# Supplementary material for: α‐Diazo Sulfonium Triflates: Synthesis, Structure, and Application to the Synthesis of 1‐(Dialkylamino)‐1,2,3‐triazoles
Source: PubMed Central journal article supplement — Angew Chem Int Ed Engl. 2021 Feb 17;60(13):6943–8. doi: 10.1002/anie.202014775 (PMC8048477; doi:10.1002/anie.202014775), 2021-02-17

Supporting Information

**$\alpha$ -Diazo Sulfonium Triflates: Synthesis, Structure, and Application to the Synthesis of 1-(Dialkylamino)-1,2,3-triazoles**

*Xiangdong Li, Christopher Golz, and Manuel Alcarazo\**

anie\_202014775\_sm\_miscellaneous\_information.pdf

# Supporting Information

## Contents

|                                                                                   |    |
|-----------------------------------------------------------------------------------|----|
| 1. General methods.....                                                           | 3  |
| 2. Synthetic procedures .....                                                     | 4  |
| 2.1 Synthesis of sulfoxides.....                                                  | 4  |
| 2.2 Synthesis of sulfonium salt <b>1</b> .....                                    | 4  |
| 2.3 Preparation of aldehyde-derived hydrazones <b>4</b> .....                     | 9  |
| 2.4 Optimizations details for the synthesis of triazoles <b>5</b> .....           | 29 |
| 2.5 Synthesis and characterization of triazoles <b>5</b> .....                    | 37 |
| 2.6 Synthesis and characterization of 1,2,3-triazolium salts <b>7</b> .....       | 59 |
| 2.7 Synthesis and characterization of rhodium complexes <b>8</b> .....            | 63 |
| 2.8 Synthesis and characterization of rhodium dicarbonyl complexes <b>9</b> ..... | 66 |
| 3. Stern-Volmer fluorescence quenching studies .....                              | 67 |
| 4. Cyclic voltammetry measurements .....                                          | 68 |
| 5. Quantum yield measurement.....                                                 | 69 |
| 5.1 Determination of the photon flux .....                                        | 69 |
| 5.2 Determination of the quantum yield.....                                       | 72 |
| 6. Light on/off experiment.....                                                   | 73 |
| 7. Other control experiments .....                                                | 74 |
| 7.1 Photoredox-catalyzed C-H diazomethylation of arenes.....                      | 74 |
| 7.2 Stoichiometric reaction .....                                                 | 78 |
| 8. Differential scanning calorimetry (DSC) of sulfonium salts <b>1</b> .....      | 78 |
| 9. Single crystal X-ray diffraction analysis .....                                | 80 |
| 9.1 General remarks .....                                                         | 80 |
| 9.2 Crystal data and structure refinement for <b>1a</b> .....                     | 81 |
| 9.3 Crystal data and structure refinement for <b>1b</b> .....                     | 82 |

|      |                                                            |    |
|------|------------------------------------------------------------|----|
| 9.4  | Crystal data and structure refinement for <b>1c</b> .....  | 83 |
| 9.5  | Crystal data and structure refinement for <b>1d</b> .....  | 84 |
| 9.6  | Crystal data and structure refinement for <b>5i</b> .....  | 85 |
| 9.7  | Crystal data and structure refinement for <b>5s</b> .....  | 86 |
| 9.8  | Crystal data and structure refinement for <b>5y</b> .....  | 87 |
| 9.9  | Crystal data and structure refinement for <b>5ab</b> ..... | 88 |
| 9.10 | Crystal data and structure refinement for <b>7w</b> .....  | 89 |
| 9.11 | Crystal data and structure refinement for <b>7x</b> .....  | 90 |
| 9.12 | Crystal data and structure refinement for <b>8w</b> .....  | 91 |
| 9.13 | Crystal data and structure refinement for <b>8x</b> .....  | 93 |
| 10.  | References .....                                           | 94 |
| 11.  | NMR spectra.....                                           | 96 |

## 1. General methods

All dry solvents were obtained from a solvent purification system MBSPS7 from M.Braun. All reactions were carried out under nitrogen atmosphere unless stated otherwise. Ethyl diazoacetate (contains  $\geq 13$  wt. % dichloromethane) was purchased from Aldrich (E22201-20G) and used without further purification. Hydrogen peroxide solution (contains inhibitor, 30 wt. % in H<sub>2</sub>O, ACS reagent) was purchased from Sigma-Aldrich (216763-500ML) and used without further purification. The photocatalysts [Ru(bpy)<sub>3</sub>][PF<sub>6</sub>]<sub>2</sub><sup>[1]</sup>, Ir(ppy)<sub>3</sub>,<sup>[2]</sup> [Ir(ppy)<sub>2</sub>(dtbbpy)][PF<sub>6</sub>]<sup>[3]</sup> and 4CzIPN<sup>[4]</sup> were prepared following the literature procedures. <sup>1</sup>H and <sup>13</sup>C NMR spectra were recorded in CDCl<sub>3</sub> or CD<sub>3</sub>CN on Bruker AVANCE III HD, Bruker AVANCE NEO 400 or Bruker AVANCE NEO 600 NMR spectrometer. <sup>1</sup>H NMR spectra were recorded with tetramethylsilane ( $\delta = 0.00$  ppm) or CD<sub>3</sub>CN ( $\delta = 1.94$  ppm) as internal reference; <sup>13</sup>C NMR spectra were recorded with CDCl<sub>3</sub> ( $\delta = 77.16$  ppm) or CD<sub>3</sub>CN ( $\delta = 1.32$  ppm) as internal reference. High resolution mass spectra (ESI) were measured on a Bruker maXis II mass spectrometer or a Bruker micrOTOF benchtop ESI-TOF mass spectrometer. IR spectra were recorded on JASCO FT/IR-4600 Fourier Transform Infrared Spectrometer at room temperature, and the stretching frequencies are reported in wavenumbers (cm<sup>-1</sup>). UV/Vis spectra were recorded on JASCO V-650 spectrophotometer. Differential scanning calorimetry (DSC) data were recorded on Mettler Toledo TGA/DSC 3<sup>+</sup> STAR<sup>e</sup> System. Column chromatography was performed either on Merck 60 (40-63  $\mu$ m) silica gel or by using Biotage One automated column chromatography system with CHROMABOND<sup>®</sup> Flash BT 15g (or 25g) SiOH 40-63  $\mu$ m from Macherey-Nagel. Thin-layer chromatography (TLC) analysis was performed using POLYGRAM<sup>®</sup> SIL G/UV254 TLC plates from Macherey-Nagel and visualized by UV irradiation and/or phosphomolybdic acid staining. All commercially available compounds (Acros, ABCR, Alfa Aesar, Aldrich, Fluorochem, TCI) were used as received unless stated otherwise.



## 2. Synthetic procedures

### 2.1 Synthesis of sulfoxides

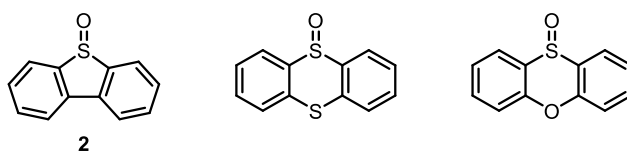

Dibenzo[*b,d*]thiophene 5-oxide (**2**)<sup>[5]</sup> and thianthrene 5-oxide<sup>[6]</sup> were prepared according to the previously reported literature procedures. Phenoxathiine 10-oxide was prepared according to the following procedure:

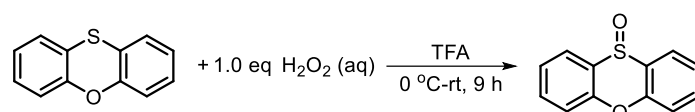

To a suspension of phenoxathiine (2.00 g, 10 mmol, 1.0 equiv.) in trifluoroacetic acid (10 mL) was added dropwise H<sub>2</sub>O<sub>2</sub> (30 wt. %, 1.02 mL, 10 mmol, 1.0 equiv.) at 0 °C. After this, the ice bath was removed and the reaction was allowed to warm up to room temperature. The reaction was stirred for an additional 9 hours, then diluted with H<sub>2</sub>O, and finally extracted with dichloromethane and dried over Na<sub>2</sub>SO<sub>4</sub>. Evaporation of the organic solvent under the reduced pressure afforded a residue, which was purified by column chromatography on silica gel (eluent: dichloromethane/methanol = 50:1) to afford phenoxathiine 10-oxide (1.99 g, 92% yield) as a white solid. <sup>1</sup>H NMR (300 MHz, CDCl<sub>3</sub>) δ 7.94-7.91 (m, 2H), 7.65-7.59 (m, 2H), 7.45-7.35 (m, 4H); <sup>13</sup>C NMR (75 MHz, CDCl<sub>3</sub>) δ 149.6, 133.9, 131.2, 125.0, 123.8, 118.9. The spectroscopic data are in agreement with those previously reported.<sup>[7]</sup>

### 2.2 Synthesis of sulfonium salt 1

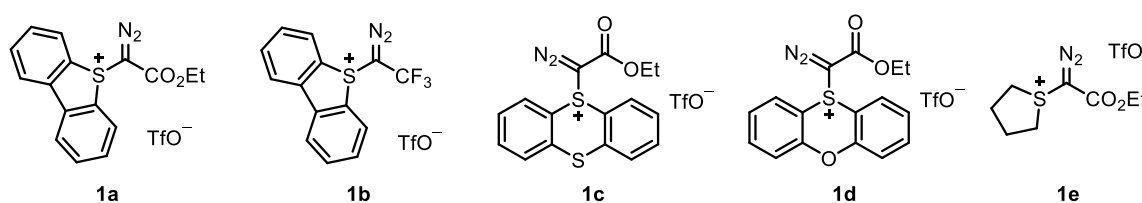

## 2.2.1 Procedure for the synthesis of 5-(1-diazo-2-ethoxy-2-oxoethyl)-5*H*-dibenzo-*[b,d]*-thiophen-5-ium trifluoromethanesulfonate (**1a**)

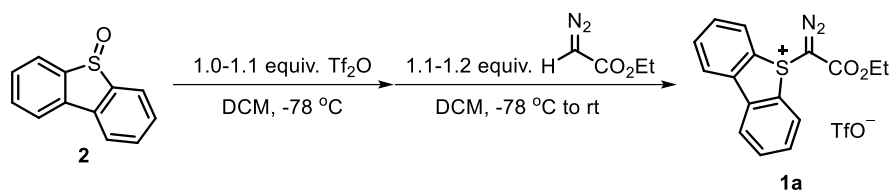

$\text{Tf}_2\text{O}$  (1.68 mL, 10 mmol, 1.0 equiv.) was added dropwise over 30 minutes with a syringe pump to a solution of dibenzo[*b,d*]thiophene 5-oxide (**2**) (2.00 g, 10 mmol, 1.0 equiv.) in dry dichloromethane (100 mL) at  $-78\text{ }^\circ\text{C}$  under  $\text{N}_2$ . After stirring the resulting mixture for one hour, a solution of ethyl diazoacetate (contains  $\geq 13$  wt. % dichloromethane, 1.33 mL, 11 mmol, 1.1 equiv.) in dichloromethane (10 mL) was added dropwise over 30 minutes by a syringe pump and the mixture was further stirred at  $-78\text{ }^\circ\text{C}$  for one additional hour. Then, the cooling system was removed, and the resulting mixture was further stirred at room temperature for 30 minutes. The reaction was then quenched with water, extracted with dichloromethane and dried over  $\text{Na}_2\text{SO}_4$ . Evaporation of the organic solvent under the reduced pressure afforded a residue, which was purified by column chromatography on silica gel (eluent: dichloromethane/methanol = 25:1) to afford **1a** (2.74 g, 61% yield) as a pale yellow solid.

A procedure for the synthesis of sulfonium salt **1a** without using column chromatography was also developed:  $\text{Tf}_2\text{O}$  (1.85 mL, 11 mmol, 1.1 equiv.) was added dropwise over 30 minutes by a syringe pump to a solution of dibenzo[*b,d*]thiophene 5-oxide (**2**) (2.00 g, 10 mmol, 1.0 equiv.) in dry dichloromethane (100 mL) at  $-78\text{ }^\circ\text{C}$  under  $\text{N}_2$ . After stirring the resulting mixture for one additional hour, a solution of ethyl diazoacetate (contains  $\geq 13$  wt. % dichloromethane, 12 mmol, 1.2 equiv, 1.45 mL) in dichloromethane (10 mL) was added dropwise over 30 minutes using a syringe pump and the mixture was further stirred at  $-78\text{ }^\circ\text{C}$  for two additional hours. Then, the cooling system was removed, and the resulting mixture was further stirred at room temperature for 30 minutes. Then, diethyl ether (200 mL) was added slowly to the above reaction mixture with continuous stirring. Filtration of the suspension afforded a light yellow solid, which was further washed with diethyl ether ( $3 \times 50$  mL). A suspension of the collected solid in dichloromethane (20 mL) was further subjected to sonication for 5 minutes applying an ultrasonic cleaner. Filtration of the suspension afforded **1a** as a pale yellow solid, which was further washed with dichloromethane ( $3 \times 5$  mL), and finally dried under vacuum furnishing 2.52 g (56% yield) of **1a**.  $^1\text{H}$  NMR (300 MHz, acetonitrile- $d_3$ )  $\delta$  8.32-8.28 (m, 2H), 8.25-8.22 (m, 2H), 7.94-7.88 (m, 2H), 7.78-7.73 (m, 2H), 3.89 (q,  $J = 7.2$  Hz, 2H), 0.86 (t,  $J = 7.2$  Hz,

3H).  $^{13}\text{C}$  NMR (75 MHz, acetonitrile- $d_3$ )  $\delta$  159.1, 140.2, 135.6, 132.3, 129.6, 129.0, 124.9, 124.3, 122.1 (q,  $J = 318.6$  Hz), 64.4, 13.9;  $^{19}\text{F}$  NMR (282 MHz, acetonitrile- $d_3$ )  $\delta$  -79.2; IR (neat): 2155, 1712, 1448, 1254, 1225, 1167, 1149, 1078, 1029, 1008, 777, 764, 755, 732, 705, 635, 614, 572, 544, 517, 473, 420  $\text{cm}^{-1}$ ; HRMS calculated  $m/z$  for  $\text{C}_{16}\text{H}_{13}\text{N}_2\text{O}_2\text{S}^+$  [M-OTf]: 297.0692, found (ESI) 297.0683.

## 2.2.2 Procedure for the synthesis of 5-(1-diazo-2,2,2-trifluoroethyl)-5*H*-dibenzo[*b,d*]thiophen-5-ium trifluoromethanesulfonate (**1b**)

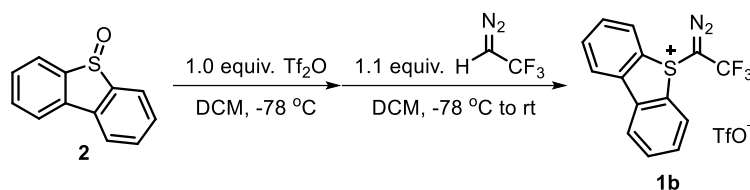

$\text{Tf}_2\text{O}$  (841  $\mu\text{L}$ , 5 mmol, 1.0 equiv.) was added dropwise over 30 minutes with a syringe pump to a solution of dibenzo[*b,d*]thiophene 5-oxide (**2**) (1.00 g, 5 mmol, 1.0 equiv.) in dry dichloromethane (40 mL) at  $-78\text{ }^\circ\text{C}$  under  $\text{N}_2$ . After stirring the resulting mixture for additional 30 minutes, 2-diazo-1,1,1-trifluoroethane<sup>[8, 9]</sup> (17.6 mL of 0.312 M in DCM, 5.5 mmol, 1.1 equiv.) was added dropwise over 30 minutes by a syringe pump and the mixture was further stirred at  $-78\text{ }^\circ\text{C}$  for two additional hours. Then, the cooling was removed, and the resulting mixture was further stirred at room temperature for 30 minutes. Diethyl ether (120 mL) was subsequently added to the above reaction mixture with continuous stirring. Filtration of the suspension afforded a light yellow solid, which was further washed with diethyl ether ( $3 \times 30$  mL). A suspension of the collected solid in dichloromethane (10 mL) was further subjected to sonication for 5 minutes using an ultrasonic cleaner. Filtration of the suspension afforded **1b** as an off-white solid, which was finally dried under vacuum furnishing 1.34 g (61% yield) of **1b**.  $^1\text{H}$  NMR (300 MHz, acetonitrile- $d_3$ )  $\delta$  8.43-8.40 (m, 2H), 8.27-8.24 (m, 2H), 7.98-7.93 (m, 2H), 7.84-7.78 (m, 2H);  $^{13}\text{C}$  NMR (75 MHz, acetonitrile- $d_3$ )  $\delta$  139.4, 136.4, 132.8, 129.6, 128.8, 125.6, 123.1 (q,  $J = 272.1$  Hz), 122.1 (q,  $J = 318.8$  Hz);  $^{19}\text{F}$  NMR (282 MHz, acetonitrile- $d_3$ )  $\delta$  -55.3, -79.3; IR (neat): 3086, 3070, 2200, 2143, 1447, 1298, 1258, 1221, 1130, 1007, 758, 627, 509, 418  $\text{cm}^{-1}$ ; HRMS calculated  $m/z$  for  $\text{C}_{14}\text{H}_8\text{F}_3\text{N}_2\text{S}^+$  [M-OTf]: 293.0355, found (ESI) 293.0356.

### 2.2.3 Procedure for the synthesis of 5-(1-diazo-2-ethoxy-2-oxoethyl)-5*H*-thianthren-5-ium trifluoromethanesulfonate (**1c**)

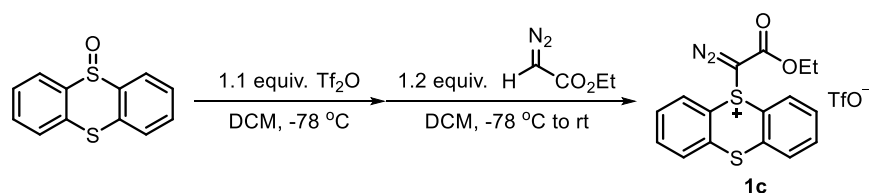

Tf<sub>2</sub>O (925 μL, 5.5 mmol, 1.1 equiv.) was added dropwise over 30 minutes with a syringe pump to a solution of thianthrene 5-oxide (1.16 g, 5 mmol, 1.0 equiv.) in dry dichloromethane (40 mL) at -78 °C under N<sub>2</sub>. After stirring the resulting mixture for one additional hour, a solution of ethyl diazoacetate (contains ≥13 wt. % dichloromethane, 725 μL, 6 mmol, 1.2 equiv.) in dichloromethane (4 mL) was added dropwise over 30 minutes using a syringe pump and the mixture was further stirred at -78 °C for two additional hours. Then, the cooling was removed, and the resulting mixture was further stirred at room temperature for 30 minutes. The reaction was quenched with water, extracted with dichloromethane and dried over Na<sub>2</sub>SO<sub>4</sub>. Evaporation of the organic solvent under the reduced pressure afforded a residue, which was purified by column chromatography on silica gel (eluent: dichloromethane/methanol = 20:1) to afford **1c** (772 mg, 32% yield) as a yellow solid. <sup>1</sup>H NMR (300 MHz, acetonitrile-*d*<sub>3</sub>) δ 8.21-8.17 (m, 2H), 8.00-7.96 (m, 2H), 7.88-7.82 (m, 2H), 7.78-7.72 (m, 2H), 4.28 (q, *J* = 7.1 Hz, 2H), 1.23 (t, *J* = 7.1 Hz, 3H). <sup>13</sup>C NMR (75 MHz, acetonitrile-*d*<sub>3</sub>) δ 160.6, 137.1, 136.0, 134.4, 131.6, 130.9, 122.1 (q, *J* = 320.8 Hz), 118.4. <sup>19</sup>F NMR (282 MHz, acetonitrile-*d*<sub>3</sub>) δ -79.3; IR (neat): 3078, 2998, 2107, 1739, 1692, 1450, 1297, 1268, 1258, 1236, 1225, 1144, 1028, 754, 733, 633, 515, 474 cm<sup>-1</sup>; HRMS calculated *m/z* for C<sub>16</sub>H<sub>13</sub>N<sub>2</sub>O<sub>2</sub>S<sub>2</sub><sup>+</sup> [M-OTf]: 329.0413, found (ESI) 329.0414.

### 2.2.4 Procedure for the synthesis of 10-(1-diazo-2-ethoxy-2-oxoethyl)-10*H*-phenoxathiin-10-ium trifluoromethanesulfonate (**1d**)

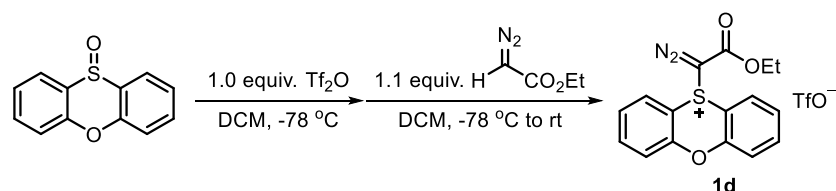

Tf<sub>2</sub>O (841 μL, 5.0 mmol, 1.0 equiv.) was added dropwise within 30 minutes with a syringe pump to a solution of phenoxathiin 10-oxide (1.08 g, 5.0 mmol, 1.0 equiv.) in dry dichloromethane (40 mL) at -78 °C under N<sub>2</sub>. After stirring the resulting mixture for one

additional hour, a solution of ethyl diazoacetate (contains  $\geq 13$  wt. % dichloromethane, 665  $\mu\text{L}$ , 5.5 mmol, 1.1 equiv.) in dichloromethane (5 mL) was added dropwise within 30 minutes using a syringe pump and the mixture was further stirred at  $-78$   $^{\circ}\text{C}$  for three additional hours. Then, the cooling was removed, and the resulting mixture was further stirred at room temperature for 30 minutes. The reaction was quenched with water, extracted with dichloromethane and dried over  $\text{Na}_2\text{SO}_4$ . Evaporation of the organic solvent under the reduced pressure afforded a residue, which was purified by column chromatography on silica gel (eluent: dichloromethane/methanol = 20:1) to afford **1d** (1.52 g, 66% yield) as an off-white solid.  $^1\text{H}$  NMR (300 MHz, acetonitrile- $d_3$ )  $\delta$  8.18-8.15 (m, 2H), 7.89-7.83 (m, 2H), 7.59-7.51 (m, 4H), 4.05 (q,  $J = 7.1$  Hz, 2H), 1.08 (t,  $J = 7.2$  Hz, 3H).  $^{13}\text{C}$  NMR (75 MHz, acetonitrile- $d_3$ )  $\delta$  159.8, 153.3, 137.9, 132.1, 127.8, 122.1 (q,  $J = 318.9$  Hz), 120.4, 102.8, 64.7, 14.1;  $^{19}\text{F}$  NMR (282 MHz, acetonitrile- $d_3$ )  $\delta$  -79.2; IR (neat): 3084, 2153, 1712, 1471, 1255, 1234, 1221, 1153, 1029, 786, 760, 734, 632, 515  $\text{cm}^{-1}$ ; HRMS calculated  $m/z$  for  $\text{C}_{16}\text{H}_{13}\text{N}_2\text{O}_3\text{S}^+$  [M-OTf]: 313.0641, found (ESI) 313.0644.

### 2.2.5 Procedure for the synthesis of 1-(1-diazo-2-ethoxy-2-oxoethyl)tetrahydro-1H-thiophen-1-ium trifluoromethanesulfonate (**1e**)

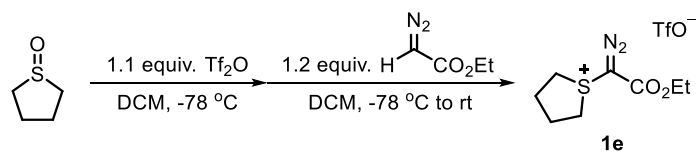

$\text{Tf}_2\text{O}$  (925  $\mu\text{L}$ , 5.5 mmol, 1.1 equiv.) was added dropwise over 30 minutes with a syringe pump to a solution of tetrahydrothiophene 1-oxide (450  $\mu\text{L}$ , 5.0 mmol, 1.0 equiv.) in dry dichloromethane (40 mL) at  $-78$   $^{\circ}\text{C}$  under  $\text{N}_2$ . After stirring the resulting mixture for one additional hour, a solution of ethyl diazoacetate (contains  $\geq 13$  wt. % dichloromethane, 725  $\mu\text{L}$ , 6.0 mmol, 1.2 equiv.) in dichloromethane (5 mL) was added dropwise over 30 minutes using a syringe pump and the mixture was further stirred at  $-78$   $^{\circ}\text{C}$  for four additional hours. Then, the cooling was removed, and the resulting mixture was further stirred at room temperature for 30 minutes. Then, diethyl ether (40 mL) was added slowly to the above reaction mixture with continuous stirring. Filtration of the suspension afforded a white solid, which was further washed with diethyl ether ( $3 \times 10$  mL), and finally dried under vacuum furnishing 908 mg (52% yield) of **1e**.  $^1\text{H}$  NMR (300 MHz, acetonitrile- $d_3$ )  $\delta$  4.32 (q,  $J = 7.1$  Hz, 2H), 3.89-3.80 (m, 2H), 3.72-3.63 (m, 2H), 2.57-2.45 (m, 2H), 2.23-2.09 (m, 2H), 1.30 (t,  $J = 7.1$  Hz, 3H).  $^{13}\text{C}$  NMR (100 MHz, acetonitrile- $d_3$ )  $\delta$  161.0, 122.1 (q,  $J = 320.8$  Hz), 64.7, 47.4, 29.6, 14.4;  $^{19}\text{F}$  NMR (282 MHz, acetonitrile- $d_3$ )  $\delta$  -79.3; IR (neat): 3006, 2994, 2955, 2116, 1703, 1466,

1452, 1426, 1396, 1370, 1290, 1268, 1250, 1223, 1207, 1167, 1145, 1096, 1081, 1027, 954, 883, 860, 801, 757, 736, 634, 574, 536, 513, 405  $\text{cm}^{-1}$ ; HRMS calculated  $m/z$  for  $\text{C}_8\text{H}_{13}\text{N}_2\text{O}_2\text{S}^+$  [M-OTf]: 201.0692, found (ESI) 201.0691.

## 2.3 Preparation of aldehyde-derived hydrazones 4

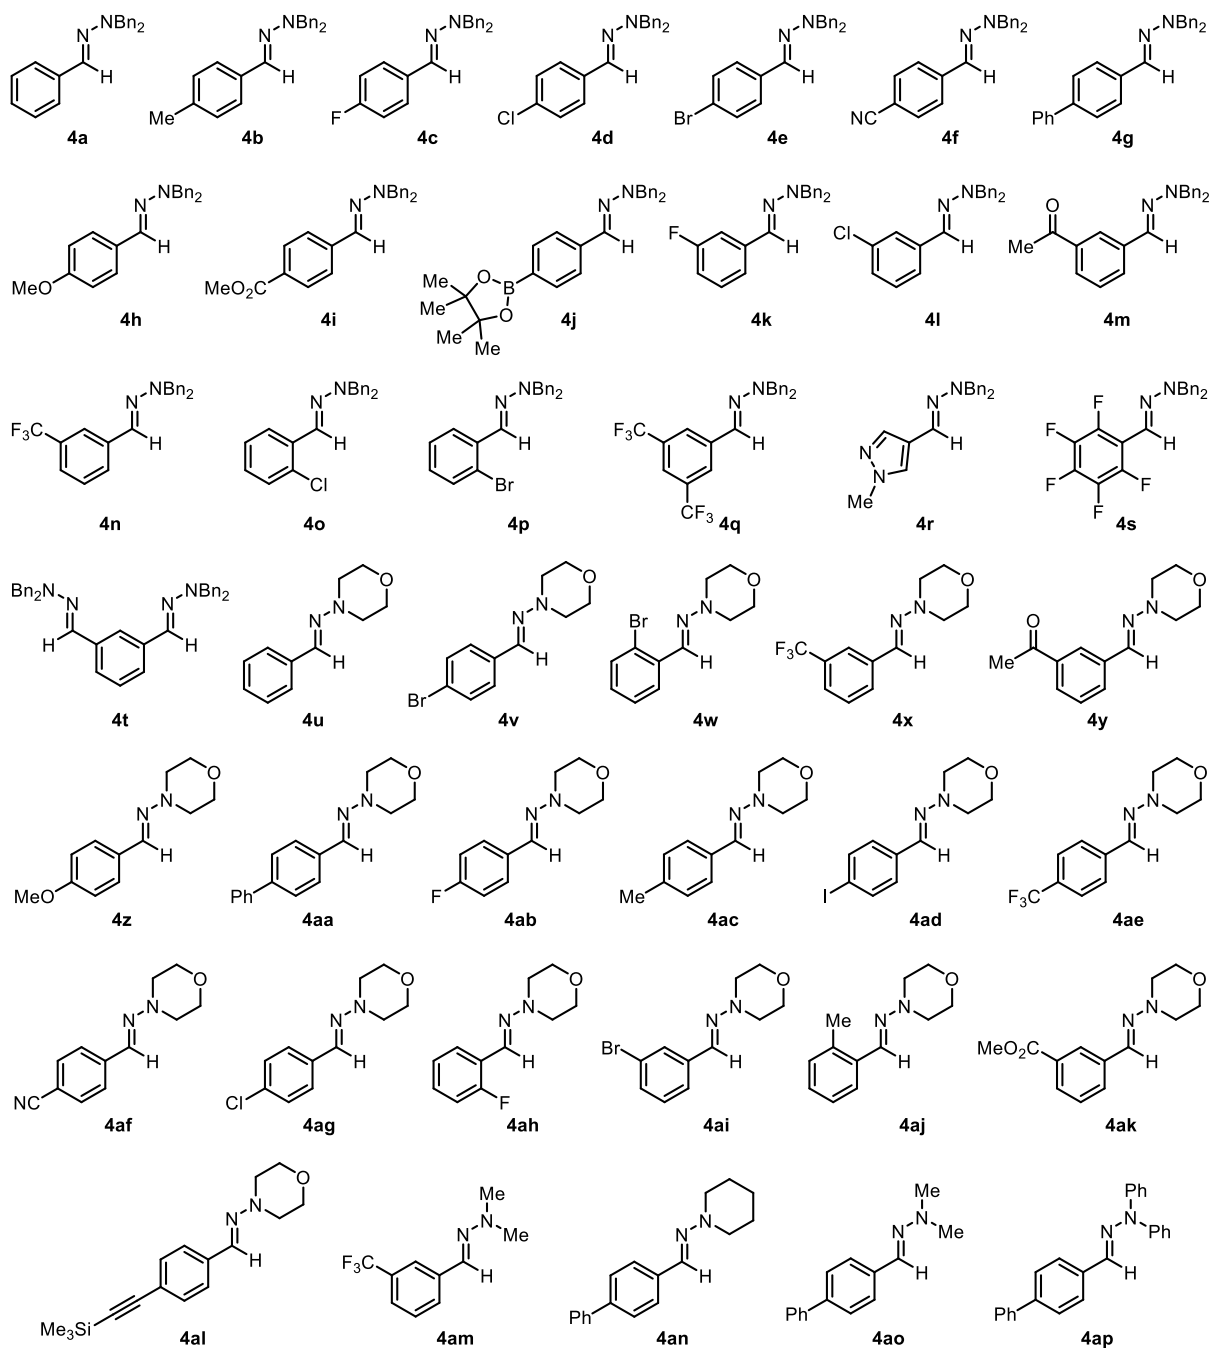

Hydrazones **4ab**,<sup>[10]</sup> **4ac**<sup>[10]</sup> and **4ao**<sup>[11]</sup> were prepared according to the previously reported literature procedures. The other hydrazones were synthesized by modified procedures of the reported method, which are described below.<sup>[12]</sup>

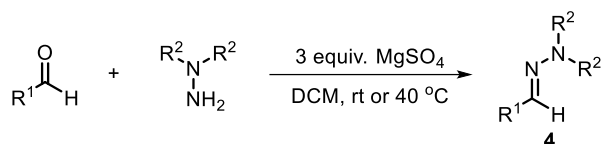

To a solution of aldehyde (1.0 equiv.) in dry DCM was added hydrazine (1.0-1.1 equiv.) and anhydrous MgSO<sub>4</sub> (3 equiv.). The resulting reaction mixture was stirred at room temperature or 40 °C with TLC monitoring until the reaction was completed. Then, the reaction mixture was filtered through a pad of celite. The solvent was removed under vacuum and the residue was purified by column chromatography on silica gel to afford hydrazones **4**.

### 2.3.1 Synthesis and characterization of (*E*)-1,1-dibenzyl-2-benzylidenehydrazine (**4a**)

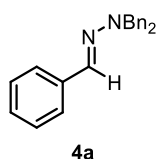

A mixture of benzaldehyde (203  $\mu$ L, 2 mmol, 1.0 equiv.), 1,1-dibenzylhydrazine (467 mg, 2.2 mmol, 1.1 equiv.), MgSO<sub>4</sub> (722 mg, 6 mmol, 3 equiv.) and DCM (20 mL) was stirred at 40 °C for 23 h. Column chromatography on silica gel (eluent: hexane to hexane/ethyl acetate = 20:1) afforded **4a** in 98% yield (588 mg) as a white solid. <sup>1</sup>H NMR (300 MHz, CDCl<sub>3</sub>)  $\delta$  7.51-7.48 (m, 2H), 7.32-7.17 (m, 14H), 4.52 (s, 4H); <sup>13</sup>C NMR (75 MHz, CDCl<sub>3</sub>)  $\delta$  137.8, 137.1, 132.0, 128.7, 128.5, 127.8, 127.3, 125.7, 58.0. The spectroscopic data are in agreement with those previously reported.<sup>[13]</sup>

### 2.3.2 Synthesis and characterization of (*E*)-1,1-dibenzyl-2-(4-methylbenzylidene)-hydrazine (**4b**)

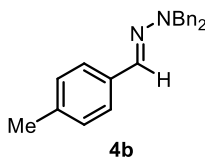

A mixture of 4-methylbenzaldehyde (236  $\mu$ L, 2 mmol, 1.0 equiv.), 1,1-dibenzylhydrazine (467 mg, 2.2 mmol, 1.1 equiv.), MgSO<sub>4</sub> (722 mg, 6 mmol, 3 equiv.) and DCM (20 mL) was stirred at 40 °C for 16 h. Column chromatography on silica gel (eluent: hexane to hexane/ethyl acetate = 20:1) afforded **4b** in 74% yield (463 mg) as a white solid. <sup>1</sup>H NMR (300 MHz, CDCl<sub>3</sub>)  $\delta$  7.41-7.38 (m, 2H), 7.33-7.20 (m, 10H), 7.16 (s, 1H), 7.10-7.08 (m, 2H), 4.48 (s, 4H), 2.31 (s, 3H); <sup>13</sup>C NMR (75 MHz, CDCl<sub>3</sub>)  $\delta$  137.8, 137.2, 134.3, 132.5, 129.3, 128.6, 127.8, 127.3, 125.7, 58.0, 21.4. The spectroscopic data are in agreement with those previously reported.<sup>[14]</sup>

### 2.3.3 Synthesis and characterization of (*E*)-1,1-dibenzyl-2-(4-fluorobenzylidene)-hydrazine (**4c**)

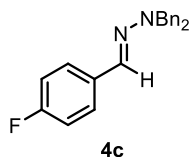

A mixture of 4-fluorobenzaldehyde (215  $\mu$ L, 2 mmol, 1.0 equiv.), 1,1-dibenzylhydrazine (467 mg, 2.2 mmol, 1.1 equiv.),  $\text{MgSO}_4$  (722 mg, 6 mmol, 3 equiv.) and DCM (20 mL) was stirred at 40  $^\circ\text{C}$  for 20 h. Column chromatography on silica gel (eluent: hexane to hexane/ethyl acetate = 20:1) afforded **4c** in 99% yield (630 mg) as a white solid.  $^1\text{H}$  NMR (300 MHz,  $\text{CDCl}_3$ )  $\delta$  7.47-7.42 (m, 2H), 7.34-7.21 (m, 10H), 7.13 (s, 1H), 6.99-6.93 (m, 2H), 4.50 (s, 4H);  $^{13}\text{C}$  NMR (75 MHz,  $\text{CDCl}_3$ )  $\delta$  162.3 (d,  $^1J_{\text{C-F}} = 246.2$  Hz), 137.7, 133.3 (d,  $^4J_{\text{C-F}} = 3.1$  Hz), 130.9, 128.7, 127.8, 127.4, 127.1 (d,  $^3J_{\text{C-F}} = 7.9$  Hz), 115.5 (d,  $^2J_{\text{C-F}} = 21.7$  Hz), 58.1;  $^{19}\text{F}$  NMR (282 MHz,  $\text{CDCl}_3$ )  $\delta$  114.9; IR (neat): 3030, 2974, 2829, 1739, 1603, 1574, 1506, 1495, 1452, 1433, 1365, 1346, 1319, 1260, 1227, 1215, 1116, 1092, 1072, 1028, 969, 953, 912, 890, 861, 841, 827, 800, 793, 748, 732, 700, 632, 621, 606, 570, 538, 528, 464  $\text{cm}^{-1}$ ; HRMS calculated  $m/z$  for  $\text{C}_{21}\text{H}_{20}\text{FN}_2^+$   $[\text{M}+\text{H}]^+$ : 319.1605, found (ESI) 319.1605.

### 2.3.4 Synthesis and characterization of (*E*)-1,1-dibenzyl-2-(4-chlorobenzylidene)-hydrazine (**4d**)

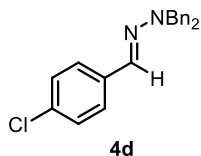

A mixture of 4-chlorobenzaldehyde (281 mg, 2 mmol, 1.0 equiv.), 1,1-dibenzylhydrazine (467 mg, 2.2 mmol, 1.1 equiv.),  $\text{MgSO}_4$  (722 mg, 6 mmol, 3 equiv.) and DCM (20 mL) was stirred at 40  $^\circ\text{C}$  for 20 h. Column chromatography on silica gel (eluent: hexane to hexane/ethyl acetate = 20:1) afforded **4d** in 44% yield (295 mg) as a white solid.  $^1\text{H}$  NMR (300 MHz,  $\text{CDCl}_3$ )  $\delta$  7.42-7.38 (m, 2H), 7.34-7.21 (m, 12H), 7.09 (s, 1H), 4.51 (s, 4H);  $^{13}\text{C}$  NMR (75 MHz,  $\text{CDCl}_3$ )  $\delta$  137.5, 135.7, 132.7, 130.3, 128.73, 128.66, 127.7, 127.4, 126.8, 58.0; IR (neat): 3030, 2859, 1581, 1557, 1491, 1452, 1342, 1321, 1255, 1115, 1098, 1088, 1072, 970, 946, 884, 833, 820, 799, 751, 732, 694, 620, 607, 550, 520, 506, 454  $\text{cm}^{-1}$ ; HRMS calculated  $m/z$  for  $\text{C}_{21}\text{H}_{20}\text{ClN}_2^+$   $[\text{M}+\text{H}]^+$ : 335.1310, found (ESI) 335.1310.



### 2.3.5 Synthesis and characterization of (*E*)-1,1-dibenzyl-2-(4-bromobenzylidene)-hydrazine (**4e**)

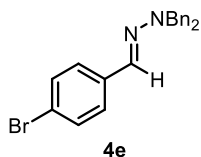

A mixture of 4-bromobenzaldehyde (637 mg, 3 mmol, 1.0 equiv.), 1,1-dibenzylhydrazine (555 mg, 3 mmol, 1.0 equiv.), MgSO<sub>4</sub> (1.08 g, 9 mmol, 3 equiv.) and DCM (30 mL) was stirred at room temperature for 24 h. Column chromatography on silica gel (eluent: hexane to hexane/ethyl acetate = 20:1) afforded **4e** in 80% yield (909 mg) as a white solid. <sup>1</sup>H NMR (300 MHz, CDCl<sub>3</sub>) δ 7.40-7.23 (m, 14H), 7.07 (s, 1H), 4.51 (s, 4H); <sup>13</sup>C NMR (75 MHz, CDCl<sub>3</sub>) δ 137.5, 136.1, 131.6, 130.2, 128.7, 127.7, 127.4, 127.1, 120.8, 58.0; IR (neat): 3030, 2963, 2853, 1739, 1587, 1487, 1451, 1344, 1114, 1097, 1069, 970, 946, 883, 832, 818, 800, 751, 732, 694, 677, 607, 547, 516, 449 cm<sup>-1</sup>; HRMS calculated *m/z* for C<sub>21</sub>H<sub>20</sub>BrN<sub>2</sub><sup>+</sup> [M+H]<sup>+</sup>: 379.0804, found (ESI) 379.0801.

### 2.3.6 Synthesis and characterization of (*E*)-4-((2,2-dibenzylhydrazineylidene)methyl)-benzonitrile (**4f**)

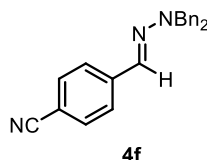

A mixture of 4-formylbenzonitrile (262 mg, 2 mmol, 1.0 equiv.), 1,1-dibenzylhydrazine (467 mg, 2.2 mmol, 1.1 equiv.), MgSO<sub>4</sub> (722 mg, 6 mmol, 3 equiv.) and DCM (20 mL) was stirred at 40 °C for 16 h. Column chromatography on silica gel (eluent: hexane to hexane/ethyl acetate = 10:1) afforded **4f** in 99% yield (643 mg) as a white solid. <sup>1</sup>H NMR (300 MHz, CDCl<sub>3</sub>) δ 7.55-7.50 (m, 4H), 7.33-7.23 (m, 10H), 7.06 (s, 1H), 4.59 (s, 4H); <sup>13</sup>C NMR (75 MHz, CDCl<sub>3</sub>) δ 141.7, 136.9, 132.3, 128.8, 128.2, 127.61, 127.57, 125.6, 119.5, 109.5, 58.0; IR (neat): 3027, 2933, 2218, 1739, 1573, 1538, 1493, 1452, 1379, 1345, 1325, 1229, 1217, 1126, 1105, 1076, 878, 833, 807, 760, 742, 732, 698, 656, 643, 578, 556, 544, 529, 466, 425 cm<sup>-1</sup>; HRMS calculated *m/z* for C<sub>22</sub>H<sub>20</sub>N<sub>3</sub><sup>+</sup> [M+H]<sup>+</sup>: 326.1652, found (ESI) 326.1652.

### 2.3.7 Synthesis and characterization of (*E*)-2-([1,1'-biphenyl]-4-ylmethylene)-1,1-dibenzylhydrazine (**4g**)

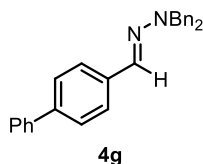

A mixture of [1,1'-biphenyl]-4-carbaldehyde (364 mg, 2 mmol, 1.0 equiv.), 1,1-dibenzylhydrazine (467 mg, 2.2 mmol, 1.1 equiv.), MgSO<sub>4</sub> (722 mg, 6 mmol, 3 equiv.) and DCM (20 mL) was stirred at 40 °C for 23 h. Column chromatography on silica gel (eluent: hexane to hexane/ethyl acetate = 20:1) afforded **4g** in 98% yield (738 mg) as a white solid. <sup>1</sup>H NMR (300 MHz, CDCl<sub>3</sub>) δ 7.60-7.51 (m, 6H), 7.44-7.38 (m, 2H), 7.34-7.20 (m, 12H), 4.54 (s, 4H); <sup>13</sup>C NMR (75 MHz, CDCl<sub>3</sub>) δ 141.0, 140.0, 137.7, 136.2, 131.4, 128.9, 128.7, 127.8, 127.35, 127.26, 127.0, 126.1, 58.0; IR (neat): 3057, 3030, 2853, 1739, 1577, 1488, 1449, 1434, 1345, 1317, 1262, 1103, 1070, 1028, 971, 951, 891, 857, 838, 796, 765, 755, 737, 728, 721, 699, 690, 642, 606, 554, 545, 492, 452 cm<sup>-1</sup>; HRMS calculated m/z for C<sub>27</sub>H<sub>25</sub>N<sub>2</sub><sup>+</sup> [M+H]<sup>+</sup>: 377.2012, found (ESI) 377.2013.

### 2.3.8 Synthesis and characterization of (*E*)-1,1-dibenzyl-2-(4-methoxybenzylidene)-hydrazine (**4h**)

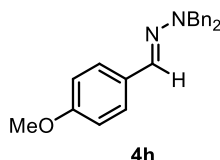

A mixture of 4-methoxybenzaldehyde (243 μL, 2 mmol, 1.0 equiv.), 1,1-dibenzylhydrazine (467 mg, 2.2 mmol, 1.1 equiv.), MgSO<sub>4</sub> (722 mg, 6 mmol, 3 equiv.) and DCM (20 mL) was stirred at 40 °C for 22 h. Column chromatography on silica gel (eluent: hexane to hexane/ethyl acetate = 10:1) afforded **4h** in 98% yield (648 mg) as a white solid. <sup>1</sup>H NMR (300 MHz, CDCl<sub>3</sub>) δ 7.46-7.41 (m, 2H), 7.34-7.21 (m, 10H), 7.17 (s, 1H), 6.86-6.81 (m, 2H), 4.47 (s, 4H), 3.79 (s, 3H); <sup>13</sup>C NMR (75 MHz, CDCl<sub>3</sub>) δ 159.3, 138.0, 132.6, 130.0, 128.6, 127.9, 127.2, 127.0, 114.0, 58.2, 55.4; IR (neat): 3030, 2838, 1606, 1511, 1493, 1453, 1348, 1308, 1253, 1110, 1097, 1069, 1028, 966, 956, 893, 822, 811, 801, 746, 731, 694, 632, 607, 528, 461 cm<sup>-1</sup>; HRMS calculated m/z for C<sub>22</sub>H<sub>23</sub>N<sub>2</sub>O<sup>+</sup> [M+H]<sup>+</sup>: 331.1805, found (ESI) 331.1803.

### 2.3.9 Synthesis and characterization of methyl (*E*)-4-[(2,2-dibenzylhydrazineylidene)-methyl]benzoate (**4i**)

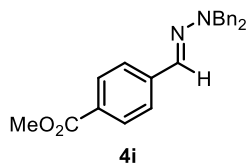

A mixture of methyl 4-formylbenzoate (328 mg, 2 mmol, 1.0 equiv.), 1,1-dibenzylhydrazine (467 mg, 2.2 mmol, 1.1 equiv.), MgSO<sub>4</sub> (722 mg, 6 mmol, 3 equiv.) and DCM (20 mL) was stirred at 40 °C for 16 h. Column chromatography on silica gel (eluent: hexane to hexane/ethyl acetate = 10:1) afforded **4i** in 97% yield (694 mg) as a white solid. <sup>1</sup>H NMR (300 MHz, CDCl<sub>3</sub>) δ 7.94 (d, *J* = 8.3 Hz, 2H), 7.53 (d, *J* = 8.3 Hz, 2H), 7.34-7.22 (m, 10H), 7.13 (s, 1H), 4.57 (s, 4H), 3.87 (s, 3H); <sup>13</sup>C NMR (75 MHz, CDCl<sub>3</sub>) δ 167.2, 141.6, 137.2, 129.9, 129.6, 128.8, 128.2, 127.6, 127.5, 125.2, 58.0, 52.1; IR (neat): 3030, 2832, 1721, 1453, 1346, 1273, 1256, 1107, 1098, 1070, 970, 899, 884, 819, 801, 752, 733, 694, 620, 608, 551, 519, 454 cm<sup>-1</sup>; HRMS calculated *m/z* for C<sub>23</sub>H<sub>23</sub>N<sub>2</sub>O<sub>2</sub><sup>+</sup> [M+H]<sup>+</sup>: 359.1754, found (ESI) 359.1754.

### 2.3.10 Synthesis and characterization of (*E*)-1,1-dibenzyl-2-(4-(4,4,5,5-tetramethyl-1,3,2-dioxaborolan-2-yl)benzylidene)hydrazine (**4j**)

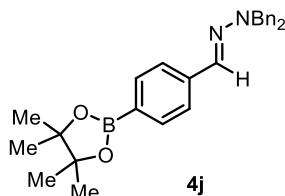

A mixture of 4-(4,4,5,5-tetramethyl-1,3,2-dioxaborolan-2-yl)benzaldehyde (464 mg, 2 mmol, 1.0 equiv.), 1,1-dibenzylhydrazine (467 mg, 2.2 mmol, 1.1 equiv.), MgSO<sub>4</sub> (722 mg, 6 mmol, 3 equiv.) and DCM (20 mL) was stirred at 40 °C for 18 h. Column chromatography on silica gel (eluent: hexane to hexane/ethyl acetate = 10:1) afforded **4j** in 81% yield (691 mg) as a white solid. <sup>1</sup>H NMR (300 MHz, CDCl<sub>3</sub>) δ 7.73 (d, *J* = 8.1 Hz, 2H), 7.49 (d, *J* = 8.1 Hz, 2H), 7.32-7.24 (m, 10H), 7.15 (s, 1H), 4.53 (s, 4H), 1.33 (s, 12H); <sup>13</sup>C NMR (75 MHz, CDCl<sub>3</sub>) δ 139.8, 137.6, 135.1, 131.5, 128.7, 127.8, 127.4, 124.9, 83.8, 58.0, 25.0; IR (neat): 2971, 2840, 1583, 1397, 1346, 1317, 1271, 1153, 1140, 1118, 1096, 1085, 1072, 972, 958, 894, 856, 832, 795, 741, 702, 662, 654, 607, 549, 456 cm<sup>-1</sup>; HRMS calculated *m/z* for C<sub>27</sub>H<sub>32</sub>BN<sub>2</sub>O<sub>2</sub><sup>+</sup> [M+H]<sup>+</sup>: 427.2551, found (ESI) 427.2557.

### 2.3.11 Synthesis and characterization of (*E*)-1,1-dibenzyl-2-(3-fluorobenzylidene)-hydrazine (4k)

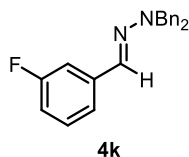

A mixture of 3-fluorobenzaldehyde (212  $\mu$ L, 2 mmol, 1.0 equiv.), 1,1-dibenzylhydrazine (467 mg, 2.2 mmol, 1.1 equiv.),  $\text{MgSO}_4$  (722 mg, 6 mmol, 3 equiv.) and DCM (20 mL) was stirred at 40  $^\circ\text{C}$  for 16 h. Column chromatography on silica gel (eluent: hexane to hexane/ethyl acetate = 20:1) afforded **4k** in 98% yield (627 mg) as a white solid.  $^1\text{H}$  NMR (300 MHz,  $\text{CDCl}_3$ )  $\delta$  7.34-7.15 (m, 13H), 7.09 (s, 1H), 6.88-6.81 (m, 1H), 4.53 (s, 4H);  $^{13}\text{C}$  NMR (75 MHz,  $\text{CDCl}_3$ )  $\delta$  163.3 (d,  $^1J_{\text{C-F}} = 244.4$  Hz), 139.6 (d,  $^3J_{\text{C-F}} = 8.0$  Hz), 137.4, 130.0 (d,  $^4J_{\text{C-F}} = 3.1$  Hz), 129.9 (d,  $^3J_{\text{C-F}} = 8.5$  Hz), 128.8, 127.7, 127.4, 121.6 (d,  $^4J_{\text{C-F}} = 2.6$  Hz), 113.9 (d,  $^2J_{\text{C-F}} = 21.7$  Hz), 111.6 (d,  $^2J_{\text{C-F}} = 22.5$  Hz), 58.0;  $^{19}\text{F}$  NMR (282 MHz,  $\text{CDCl}_3$ )  $\delta$  -113.7; IR (neat): 2835, 1591, 1565, 1493, 1445, 1429, 1346, 1321, 1260, 1154, 1138, 1108, 1069, 975, 969, 951, 905, 882, 865, 778, 747, 735, 699, 685, 650, 609, 476, 458, 422  $\text{cm}^{-1}$ ; HRMS calculated  $m/z$  for  $\text{C}_{21}\text{H}_{20}\text{FN}_2^+$   $[\text{M}+\text{H}]^+$ : 319.1605, found (ESI) 319.1607.

### 2.3.12 Synthesis and characterization of (*E*)-1,1-dibenzyl-2-(3-chlorobenzylidene)-hydrazine (4l)

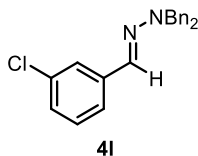

A mixture of 3-chlorobenzaldehyde (227  $\mu$ L, 2 mmol, 1.0 equiv.), 1,1-dibenzylhydrazine (467 mg, 2.2 mmol, 1.1 equiv.),  $\text{MgSO}_4$  (722 mg, 6 mmol, 3 equiv.) and DCM (20 mL) was stirred at 40  $^\circ\text{C}$  for 18 h. Column chromatography on silica gel (eluent: hexane to hexane/ethyl acetate = 20:1) afforded **4l** in 99% yield (663 mg) as a white solid.  $^1\text{H}$  NMR (300 MHz,  $\text{CDCl}_3$ )  $\delta$  7.52-7.51 (m, 1H), 7.34-7.10 (m, 13H), 7.05 (s, 1H), 4.53 (s, 4H);  $^{13}\text{C}$  NMR (75 MHz,  $\text{CDCl}_3$ )  $\delta$  139.1, 137.4, 134.6, 129.71, 129.67, 128.8, 127.7, 127.4, 127.0, 125.3, 123.8, 58.0; IR (neat): 3033, 2843, 1583, 1494, 1454, 1345, 1252, 1105, 1071, 968, 957, 902, 878, 782, 755, 736, 713, 693, 683, 652, 608, 547, 472, 450, 437  $\text{cm}^{-1}$ ; HRMS calculated  $m/z$  for  $\text{C}_{21}\text{H}_{20}\text{ClN}_2^+$   $[\text{M}+\text{H}]^+$ : 335.1310, found (ESI) 335.1308.

### 2.3.13 Synthesis and characterization of (*E*)-1-{3-[(2,2-dibenzylhydrazineylidene)-methyl]phenyl}ethan-1-one (**4m**)

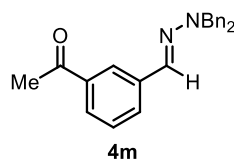

A mixture of 3-acetylbenzaldehyde (296 mg, 2 mmol, 1.0 equiv.), 1,1-dibenzylhydrazine (467 mg, 2.2 mmol, 1.1 equiv.), MgSO<sub>4</sub> (722 mg, 6 mmol, 3 equiv.) and DCM (20 mL) was stirred at 40 °C for 15 h. Column chromatography on silica gel (eluent: hexane to hexane/ethyl acetate = 10:1) afforded **4m** in 96% yield (659 mg) as a white solid. <sup>1</sup>H NMR (300 MHz, CDCl<sub>3</sub>) δ 8.01-8.00 (m, 1H), 7.78-7.72 (m, 2H), 7.40-7.24 (m, 11H), 7.18 (s, 1H), 4.56 (s, 4H), 2.59 (s, 3H); <sup>13</sup>C NMR (75 MHz, CDCl<sub>3</sub>) δ 198.5, 137.7, 137.5, 137.4, 130.2, 129.8, 128.8, 127.7, 127.5, 126.9, 125.6, 58.1, 26.9; IR (neat): 3057, 3027, 2998, 2968, 2939, 1739, 1674, 1560, 1359, 1274, 1230, 1217, 1200, 937, 753, 695, 603, 587, 551 cm<sup>-1</sup>; HRMS calculated *m/z* for C<sub>23</sub>H<sub>23</sub>N<sub>2</sub>O<sup>+</sup> [M+H]<sup>+</sup>: 343.1805, found (ESI) 343.1807.

### 2.3.14 Synthesis and characterization of (*E*)-1,1-dibenzyl-2-[3-(trifluoromethyl)benzylidene]hydrazine (**4n**)

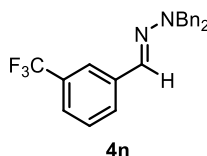

A mixture of 3-(trifluoromethyl)benzaldehyde (268 μL, 2 mmol, 1.0 equiv.), 1,1-dibenzylhydrazine (467 mg, 2.2 mmol, 1.1 equiv.), MgSO<sub>4</sub> (722 mg, 6 mmol, 3 equiv.) and DCM (20 mL) was stirred at 40 °C for 16 h. Column chromatography on silica gel (eluent: hexane to hexane/ethyl acetate = 20:1) afforded **4n** in 73% yield (540 mg) as a white solid. <sup>1</sup>H NMR (300 MHz, CDCl<sub>3</sub>) δ 7.74 (s, 1H), 7.63 (d, *J* = 7.3 Hz, 1H), 7.41-7.21 (m, 12H), 7.13 (s, 1H), 4.56 (s, 4H); <sup>13</sup>C NMR (75 MHz, CDCl<sub>3</sub>) δ 138.0, 137.3, 130.9 (q, <sup>2</sup>*J*<sub>C-F</sub> = 32.1 Hz), 129.4, 128.9, 128.8, 128.6, 127.7, 127.5, 124.4 (q, <sup>1</sup>*J*<sub>C-F</sub> = 270.7 Hz), 123.5 (q, <sup>3</sup>*J*<sub>C-F</sub> = 4.0 Hz), 122.2 (q, <sup>3</sup>*J*<sub>C-F</sub> = 3.9 Hz), 58.0; <sup>19</sup>F NMR (282 MHz, CDCl<sub>3</sub>) δ -62.7; IR (neat): 3033, 2974, 2933, 1737, 1557, 1343, 1326, 1215, 1149, 1140, 1109, 1094, 1068, 1028, 977, 902, 799, 746, 729, 695, 670, 651, 627, 553, 456 cm<sup>-1</sup>; HRMS calculated *m/z* for C<sub>22</sub>H<sub>20</sub>F<sub>3</sub>N<sub>2</sub><sup>+</sup> [M+H]<sup>+</sup>: 369.1573, found (ESI) 369.1574.

### 2.3.15 Synthesis and characterization of (*E*)-1,1-dibenzyl-2-(2-chlorobenzylidene)-hydrazine (**4o**)

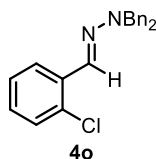

A mixture of 2-chlorobenzaldehyde (225  $\mu$ L, 2 mmol, 1.0 equiv.), 1,1-dibenzylhydrazine (467 mg, 2.2 mmol, 1.1 equiv.),  $\text{MgSO}_4$  (722 mg, 6 mmol, 3 equiv.) and DCM (20 mL) was stirred at 40  $^\circ\text{C}$  for 16 h. Column chromatography on silica gel (eluent: hexane to hexane/ethyl acetate = 20:1) afforded **4o** in 99% yield (665 mg) as a white solid.  $^1\text{H}$  NMR (300 MHz,  $\text{CDCl}_3$ )  $\delta$  7.98-7.94 (m, 1H), 7.54 (s, 1H), 7.35-7.17 (m, 12H), 7.11-7.06 (m, 1H), 4.56 (s, 4H);  $^{13}\text{C}$  NMR (75 MHz,  $\text{CDCl}_3$ )  $\delta$  137.4, 134.3, 132.3, 129.6, 128.7, 128.1, 127.93, 127.88, 127.4, 126.8, 125.8, 58.2; IR (neat): 3025, 2968, 1739, 1574, 1548, 1452, 1439, 1365, 1353, 1228, 1217, 1205, 1029, 972, 749, 731, 694, 456  $\text{cm}^{-1}$ ; HRMS calculated  $m/z$  for  $\text{C}_{21}\text{H}_{20}\text{ClN}_2^+$   $[\text{M}+\text{H}]^+$ : 335.1310, found (ESI) 335.1312.

### 2.3.16 Synthesis and characterization of (*E*)-1,1-dibenzyl-2-(2-bromobenzylidene)-hydrazine (**4p**)

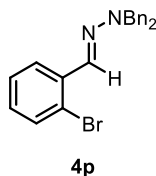

A mixture of 2-bromobenzaldehyde (233  $\mu$ L, 2 mmol, 1.0 equiv.), 1,1-dibenzylhydrazine (467 mg, 2.2 mmol, 1.1 equiv.),  $\text{MgSO}_4$  (722 mg, 6 mmol, 3 equiv.) and DCM (20 mL) was stirred at 40  $^\circ\text{C}$  for 16 h. Column chromatography on silica gel (eluent: hexane to hexane/ethyl acetate = 20:1) afforded **4p** in 96% yield (727 mg) as a white solid.  $^1\text{H}$  NMR (300 MHz,  $\text{CDCl}_3$ )  $\delta$  7.94 (dd,  $J=7.9, 1.8$  Hz, 1H), 7.48 (s, 1H), 7.42 (dd,  $J=8.0, 1.3$  Hz, 1H), 7.36-7.21 (m, 11H), 7.04-6.98 (m, 1H), 4.56 (s, 4H);  $^{13}\text{C}$  NMR (75 MHz,  $\text{CDCl}_3$ )  $\delta$  137.4, 135.8, 132.9, 130.8, 128.7, 128.3, 127.9, 127.5, 127.4, 126.2, 122.7, 58.4; IR (neat): 3057, 3030, 2936, 1741, 1568, 1547, 1128, 1018, 874, 753, 731, 701, 695, 649, 611, 555, 451, 420  $\text{cm}^{-1}$ ; HRMS calculated  $m/z$  for  $\text{C}_{21}\text{H}_{20}\text{BrN}_2^+$   $[\text{M}+\text{H}]^+$ : 379.0804, found (ESI) 379.0801.

### 2.3.17 Synthesis and characterization of (*E*)-1,1-dibenzyl-2-[3,5-bis(trifluoromethyl)benzylidene]hydrazine (**4q**)

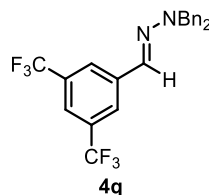

A mixture of 3,5-bis(trifluoromethyl)benzaldehyde (378 mg, 1.56 mmol, 1.0 equiv.), 1,1-dibenzylhydrazine (365 mg, 1.72 mmol, 1.1 equiv.), MgSO<sub>4</sub> (563 mg, 4.68 mmol, 3 equiv.) and DCM (20 mL) was stirred at room temperature for 20 h. Column chromatography on silica gel (eluent: hexane to hexane/ethyl acetate = 20:1) afforded **4q** in 84% yield (571 mg) as a colorless oil. <sup>1</sup>H NMR (300 MHz, CDCl<sub>3</sub>) δ 7.89 (s, 2H), 7.62 (s, 1H), 7.36-7.23 (m, 10H), 7.10 (s, 1H), 4.61 (s, 4H); <sup>13</sup>C NMR (75 MHz, CDCl<sub>3</sub>) δ 139.5, 136.8, 131.8 (q, *J* = 33.2 Hz), 128.9, 127.7, 127.6, 126.9, 125.0 (q, *J* = 3.9 Hz), 123.7 (q, *J* = 272.7 Hz), 119.9 (p, *J* = 3.8 Hz), 58.1; <sup>19</sup>F NMR (282 MHz, CDCl<sub>3</sub>) δ -62.9; IR (neat): 3064, 3033, 1561, 1453, 1340, 1274, 1168, 1122, 1074, 889, 843, 730, 696, 681, 639 cm<sup>-1</sup>; HRMS calculated *m/z* for C<sub>23</sub>H<sub>19</sub>F<sub>6</sub>N<sub>2</sub><sup>+</sup> [M+H]<sup>+</sup>: 437.1447, found (ESI) 437.1447.

### 2.3.18 Synthesis and characterization of (*E*)-4-[(2,2-dibenzylhydrazineylidene)methyl]-1-methyl-1*H*-pyrazole (**4r**)

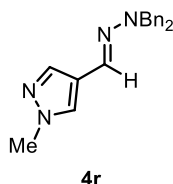

A mixture of 1-methyl-1*H*-pyrazole-4-carbaldehyde (253 mg, 2.3 mmol, 1.0 equiv.), 1,1-dibenzylhydrazine (537 mg, 2.53 mmol, 1.1 equiv.), MgSO<sub>4</sub> (831 mg, 6.9 mmol, 3 equiv.) and DCM (20 mL) was stirred at 40 °C for 16 h. Column chromatography on silica gel (eluent: hexane to hexane/ethyl acetate = 2:1) afforded **4r** in 99% yield (695 mg) as a white solid. <sup>1</sup>H NMR (300 MHz, CDCl<sub>3</sub>) δ 7.58 (s, 1H), 7.44 (s, 1H), 7.34-7.21 (m, 10H), 7.11 (s, 1H), 4.40 (s, 4H), 3.85 (s, 3H); <sup>13</sup>C NMR (75 MHz, CDCl<sub>3</sub>) δ 138.0, 137.4, 128.6, 127.8, 127.5, 127.2, 126.4, 120.9, 58.2, 39.1; IR (neat): 3030, 2960, 2921, 2840, 1739, 1450, 1171, 1063, 965, 816, 807, 756, 697, 660, 607, 542 cm<sup>-1</sup>; HRMS calculated *m/z* for C<sub>19</sub>H<sub>21</sub>N<sub>4</sub><sup>+</sup> [M+H]<sup>+</sup>: 305.1761, found (ESI) 305.1762.

### 2.3.19 Synthesis and characterization of (*E*)-1,1-dibenzyl-2-[(perfluorophenyl)methylene]hydrazine (**4s**)

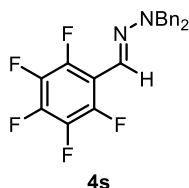

A mixture of 2,3,4,5,6-pentafluorobenzaldehyde (247  $\mu$ L, 2 mmol, 1.0 equiv.), 1,1-dibenzylhydrazine (467 mg, 2.2 mmol, 1.1 equiv.),  $\text{MgSO}_4$  (722 mg, 6 mmol, 3 equiv.) and DCM (20 mL) was stirred at 40  $^\circ\text{C}$  for 16 h. Column chromatography on silica gel (eluent: hexane to hexane/ethyl acetate = 20:1) afforded **4s** in 91% yield (710 mg) as a white solid.  $^1\text{H}$  NMR (300 MHz,  $\text{CDCl}_3$ )  $\delta$  7.34-7.24 (m, 10H), 6.98 (s, 1H), 4.59 (s, 4H);  $^{13}\text{C}$  NMR (100 MHz,  $\text{CDCl}_3$ )  $\delta$  145.6-142.8 [m, ArC(2,6)F], 139.3 [dtt,  $J = 252.6, 13.7, 4.7$  Hz, ArC(4)F], 139.3-136.4 [m, ArC(3,5)F], 136.6, 128.9, 127.7, 117.4 [q,  $J = 3.1$  Hz], 112.5 [td,  $J = 12.1, 4.1$  Hz, ArC(1)], 57.9;  $^{19}\text{F}$  NMR (282 MHz,  $\text{CDCl}_3$ )  $\delta$  -144.9 [m, Ar(2,6)F], -158.5 [t,  $J = 20.8$  Hz, Ar(4)F], -163.7 [m, Ar(3,5)F]; IR (neat): 3025, 2968, 1739, 1559, 1519, 1488, 1451, 1417, 1385, 1367, 1351, 1339, 1217, 1170, 1156, 1029, 1011, 957, 879, 854, 776, 732, 705, 694, 630, 576, 538, 460, 432  $\text{cm}^{-1}$ ; HRMS calculated  $m/z$  for  $\text{C}_{21}\text{H}_{16}\text{F}_5\text{N}_2^+$  [M+H] $^+$ : 391.1228, found (ESI) 391.1229.

### 2.3.20 Synthesis and characterization of 1,3-bis[(*E*)-(2,2-dibenzylhydrazineylidene)-methyl]benzene (**4t**)

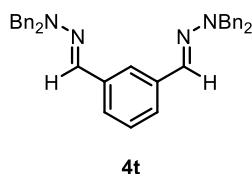

A mixture of isophthalaldehyde (268 mg, 2 mmol, 1.0 equiv.), 1,1-dibenzylhydrazine (892 mg, 4.2 mmol, 2.1 equiv.),  $\text{MgSO}_4$  (1.44 g, 12 mmol, 6 equiv.) and DCM (20 mL) was stirred at 40  $^\circ\text{C}$  for 20 h. Column chromatography on silica gel (eluent: hexane to hexane/ethyl acetate = 20:1) afforded **4t** in 99% yield (1.03 g) as a white solid.  $^1\text{H}$  NMR (300 MHz,  $\text{CDCl}_3$ )  $\delta$  7.55-7.54 (m, 1H), 7.40-7.37 (m, 2H), 7.33-7.19 (m, 21H), 7.15 (s, 2H), 4.50 (s, 8H);  $^{13}\text{C}$  NMR (75 MHz,  $\text{CDCl}_3$ )  $\delta$  137.7, 137.2, 132.0, 128.7, 127.7, 127.3, 124.5, 123.2, 58.0; IR (neat): 3057, 3025, 2936, 2845, 1591, 1563, 1494, 1453, 1442, 1352, 1342, 1326, 1312, 1287, 1273, 1260, 1118, 1107, 1070, 1029, 978, 971, 951, 914, 903, 896, 873, 810, 793, 757, 730, 694, 669, 653, 622, 607, 546, 466, 455, 433  $\text{cm}^{-1}$ ; HRMS calculated  $m/z$  for  $\text{C}_{36}\text{H}_{35}\text{N}_4^+$  [M+H] $^+$ : 523.2856,



found (ESI) 523.2857.

### 2.3.21 Synthesis and characterization of (*E*)-*N*-morpholino-1-phenylmethanimine (**4u**)

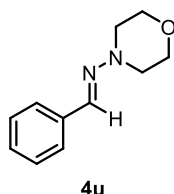

A mixture of benzaldehyde (508  $\mu$ L, 5 mmol, 1.0 equiv.), morpholin-4-amine (482  $\mu$ L, 5 mmol, 1.0 equiv.),  $\text{MgSO}_4$  (1.81 g, 15 mmol, 3 equiv.) and DCM (25 mL) was stirred at room temperature for 48 h. Column chromatography on silica gel (eluent: hexane to hexane/ethyl acetate = 5:1) afforded **4u** in 68% yield (643 mg) as a white solid.  $^1\text{H}$  NMR (300 MHz,  $\text{CDCl}_3$ )  $\delta$  7.62-7.58 (m, 3H), 7.37-7.25 (m, 3H), 3.90-3.86 (m, 4H), 3.19-3.15 (m, 4H);  $^{13}\text{C}$  NMR (75 MHz,  $\text{CDCl}_3$ )  $\delta$  136.4, 136.1, 128.7, 128.5, 126.3, 66.6, 52.0. The spectroscopic data are in agreement with those previously reported.<sup>[10]</sup>

### 2.3.22 Synthesis and characterization of (*E*)-1-(4-bromophenyl)-*N*-morpholinomethanimine (**4v**)

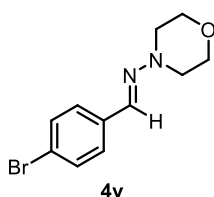

A mixture of 4-bromobenzaldehyde (555 mg, 3 mmol, 1.0 equiv.), morpholin-4-amine (322 mg, 3.15 mmol, 1.05 equiv.),  $\text{MgSO}_4$  (1.08 g, 9 mmol, 3 equiv.) and DCM (15 mL) was stirred at room temperature for 24 h. Column chromatography on silica gel (eluent: hexane to hexane/ethyl acetate = 5:1) afforded **4v** in 97% yield (785 mg) as a white solid.  $^1\text{H}$  NMR (300 MHz,  $\text{CDCl}_3$ )  $\delta$  7.50 (s, 1H), 7.46 (m, 4H), 3.90-3.86 (m, 4H), 3.19-3.15 (m, 4H);  $^{13}\text{C}$  NMR (75 MHz,  $\text{CDCl}_3$ )  $\delta$  135.1, 134.6, 131.8, 127.7, 122.2, 66.5, 51.8. The spectroscopic data are in agreement with those previously reported.<sup>[10]</sup>

### 2.3.23 Synthesis and characterization of (*E*)-1-(2-bromophenyl)-*N*-morpholinomethanimine (**4w**)

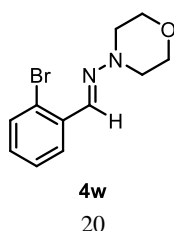

A mixture of 2-bromobenzaldehyde (370 mg, 2 mmol, 1.0 equiv.), morpholin-4-amine (214 mg, 2.1 mmol, 1.05 equiv.), MgSO<sub>4</sub> (722 mg, 6 mmol, 3 equiv.) and DCM (20 mL) was stirred at room temperature for 24 h. Column chromatography on silica gel (eluent: hexane to hexane/ethyl acetate = 5:1) afforded **4w** in 89% yield (477 mg) as a white solid. <sup>1</sup>H NMR (300 MHz, CDCl<sub>3</sub>) δ 7.92 (dd, *J* = 7.9, 1.8 Hz, 1H), 7.86 (s, 1H), 7.51 (dd, *J* = 8.0, 1.3 Hz, 1H), 7.30-7.24 (m, 1H), 7.11 (td, *J* = 7.7, 1.8 Hz, 1H), 3.90-3.86 (m, 4H), 3.23-3.20 (m, 4H); <sup>13</sup>C NMR (75 MHz, CDCl<sub>3</sub>) δ 134.8, 134.7, 132.9, 129.4, 127.5, 126.8, 123.4, 66.5, 51.8. The spectroscopic data are in agreement with those previously reported.<sup>[10]</sup>

### 2.3.24 Synthesis and characterization of (*E*)-*N*-morpholino-1-(3-(trifluoromethyl)phenyl)methanimine (**4x**)

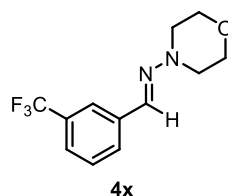

A mixture of 3-(trifluoromethyl)benzaldehyde (756 mg, 4.34 mmol, 1.0 equiv.), morpholin-4-amine (443 mg, 4.34 mmol, 1.0 equiv.), MgSO<sub>4</sub> (1.57 g, 13.0 mmol, 3 equiv.) and DCM (20 mL) was stirred at room temperature for 24 h. Column chromatography on silica gel (eluent: hexane to hexane/ethyl acetate = 5:1) afforded **4x** in 75% yield (841 mg) as a colorless oil. <sup>1</sup>H NMR (300 MHz, CDCl<sub>3</sub>) δ 7.87-7.86 (m, 1H), 7.76-7.73 (m, 1H), 7.56 (s, 1H), 7.53-7.42 (m, 2H), 3.90-3.87 (m, 4H), 3.22-3.19 (m, 4H); <sup>13</sup>C NMR (75 MHz, CDCl<sub>3</sub>) δ 137.0, 133.8, 131.1 (q, <sup>2</sup>*J*<sub>C-F</sub> = 32.3 Hz), 129.3 (q, <sup>4</sup>*J*<sub>C-F</sub> = 1.5 Hz), 129.1, 124.7 (q, <sup>3</sup>*J*<sub>C-F</sub> = 3.8 Hz), 124.3 (q, <sup>1</sup>*J*<sub>C-F</sub> = 270.8 Hz), 122.8 (q, <sup>3</sup>*J*<sub>C-F</sub> = 4.0 Hz), 66.5, 51.7; <sup>19</sup>F NMR (282 MHz, CDCl<sub>3</sub>) δ -62.8. The spectroscopic data are in agreement with those previously reported.<sup>[15]</sup>

### 2.3.25 Synthesis and characterization of (*E*)-1-{3-[(morpholinoimino)methyl]phenyl}ethan-1-one (**4y**)

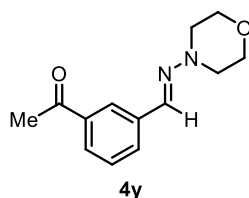

A mixture of 3-acetylbenzaldehyde (296 mg, 2 mmol, 1.0 equiv.), morpholin-4-amine (204 mg, 2 mmol, 1.0 equiv.), MgSO<sub>4</sub> (722 mg, 6 mmol, 3 equiv.) and DCM (15 mL) was stirred at room temperature for 24 h. Column chromatography on silica gel (eluent: hexane to

hexane/ethyl acetate = 3:1) afforded **4y** in 93% yield (432 mg) as a white solid. <sup>1</sup>H NMR (300 MHz, CDCl<sub>3</sub>) δ 8.16-8.14 (m, 1H), 7.87-7.79 (m, 2H), 7.60 (s, 1H), 7.43 (t, *J* = 7.7 Hz, 1H), 3.90-3.87 (m, 4H), 3.22-3.18 (m, 4H), 2.62 (s, 3H); <sup>13</sup>C NMR (75 MHz, CDCl<sub>3</sub>) δ 198.1, 137.5, 136.6, 134.5, 130.4, 128.9, 127.9, 126.1, 66.4, 51.7, 26.8; IR (neat): 2971, 2867, 1738, 1676, 1569, 1451, 1427, 1359, 1271, 1227, 1216, 1199, 1114, 1096, 1069, 1004, 917, 865, 806, 800, 690, 668, 588, 520 cm<sup>-1</sup>; HRMS calculated *m/z* for C<sub>13</sub>H<sub>17</sub>N<sub>2</sub>O<sub>2</sub><sup>+</sup> [M+H]<sup>+</sup>: 233.1285, found (ESI) 233.1286.

### 2.3.26 Synthesis and characterization of (*E*)-1-(4-methoxyphenyl)-*N*-morpholinomethanimine (**4z**)

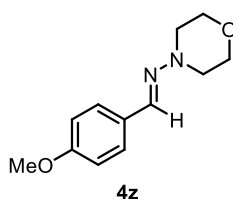

A mixture of 4-methoxybenzaldehyde (953 mg, 7 mmol, 1.0 equiv.), morpholin-4-amine (715 mg, 7 mmol, 1.0 equiv.), MgSO<sub>4</sub> (2.53 g, 21 mmol, 3 equiv.) and DCM (30 mL) was stirred at room temperature for 17 h. Column chromatography on silica gel (eluent: hexane to hexane/ethyl acetate = 4:1) afforded **4z** in 58% yield (893 mg) as a white solid. <sup>1</sup>H NMR (300 MHz, CDCl<sub>3</sub>) δ 7.59 (s, 1H), 7.57-7.52 (m, 2H), 6.91-6.86 (m, 2H), 3.90-3.87 (m, 4H), 3.82 (s, 3H), 3.16-3.13 (m, 4H); <sup>13</sup>C NMR (75 MHz, CDCl<sub>3</sub>) δ 160.1, 136.9, 128.9, 127.7, 114.2, 66.7, 55.5, 52.3. The spectroscopic data are in agreement with those previously reported.<sup>[10]</sup>

### 2.3.27 Synthesis and characterization of (*E*)-1-([1,1'-biphenyl]-4-yl)-*N*-morpholinomethanimine (**4aa**)

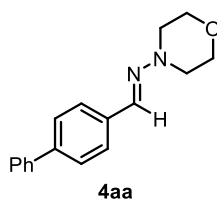

A mixture of [1,1'-biphenyl]-4-carbaldehyde (911 mg, 5 mmol, 1.0 equiv.), morpholin-4-amine (562 mg, 5.5 mmol, 1.1 equiv.), MgSO<sub>4</sub> (1.81 g, 15 mmol, 3 equiv.) and DCM (20 mL) was stirred at room temperature for 20 h. Column chromatography on silica gel (eluent: hexane to hexane/ethyl acetate = 5:1) afforded **4aa** in 98% yield (1.30 g) as a white solid. <sup>1</sup>H NMR (300 MHz, CDCl<sub>3</sub>) δ 7.68-7.57 (m, 7H), 7.46-7.41 (m, 2H), 7.36-7.31 (m, 1H), 3.90-3.87 (m, 4H), 3.21-3.17 (m, 4H); <sup>13</sup>C NMR (75 MHz, CDCl<sub>3</sub>) δ 141.1, 140.8, 135.9, 135.1, 128.9, 127.5,

127.4, 127.1, 126.7, 66.6, 52.0; IR (neat): 2952, 2853, 1587, 1447, 1355, 1263, 1114, 1092, 1067, 996, 900, 862, 833, 763, 733, 721, 694, 659, 601, 514, 500, 490  $\text{cm}^{-1}$ ; HRMS calculated  $m/z$  for  $\text{C}_{17}\text{H}_{19}\text{N}_2\text{O}^+$   $[\text{M}+\text{H}]^+$ : 267.1492, found (ESI) 267.1493.

### 2.3.28 Synthesis and characterization of (*E*)-1-(4-iodophenyl)-*N*-morpholinomethanimine (**4ad**)

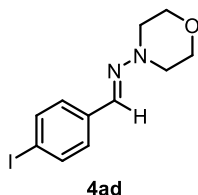

A mixture of 4-iodobenzaldehyde (464 mg, 2 mmol, 1.0 equiv.), morpholin-4-amine (214 mg, 2.1 mmol, 1.05 equiv.),  $\text{MgSO}_4$  (722 mg, 6 mmol, 3 equiv.) and DCM (15 mL) was stirred at room temperature for 18 h. Column chromatography on silica gel (eluent: hexane/ethyl acetate/DCM = 5:1:1) afforded **4ad** in 39% yield (246 mg) as a white solid.  $^1\text{H}$  NMR (300 MHz,  $\text{CDCl}_3$ )  $\delta$  7.68-7.65 (m, 2H), 7.48 (s, 1H), 7.34-7.32 (m, 2H), 3.90-3.86 (m, 4H), 3.19-3.16 (m, 4H);  $^{13}\text{C}$  NMR (75 MHz,  $\text{CDCl}_3$ )  $\delta$  137.8, 135.7, 134.7, 127.9, 93.9, 66.5, 51.8. The spectroscopic data are in agreement with those previously reported.<sup>[14]</sup>

### 2.3.29 Synthesis and characterization of (*E*)-*N*-morpholino-1-(4-(trifluoromethyl)phenyl)methanimine (**4ae**)

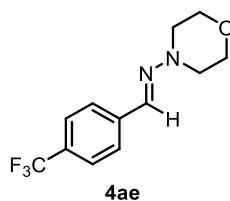

A mixture of 4-(trifluoromethyl)benzaldehyde (540 mg, 3.1 mmol, 1.0 equiv.), morpholin-4-amine (333 mg, 3.26 mmol, 1.05 equiv.),  $\text{MgSO}_4$  (1.12 g, 9.3 mmol, 3 equiv.) and DCM (15 mL) was stirred at room temperature for 18 h. Column chromatography on silica gel (eluent: hexane to hexane/ethyl acetate = 5:1) afforded **4ae** in 99% yield (796 mg) as a white solid.  $^1\text{H}$  NMR (300 MHz,  $\text{CDCl}_3$ )  $\delta$  7.68 (d,  $J = 8.1$  Hz, 2H), 7.58 (d,  $J = 8.2$  Hz, 2H), 7.54 (s, 1H), 3.90-3.87 (m, 4H), 3.23-3.20 (m, 4H);  $^{13}\text{C}$  NMR (75 MHz,  $\text{CDCl}_3$ )  $\delta$  139.6 (q,  $^5J_{\text{C-F}} = 1.6$  Hz), 133.6, 129.8 (q,  $^2J_{\text{C-F}} = 32.3$  Hz), 126.2, 125.6 (q,  $^3J_{\text{C-F}} = 3.8$  Hz), 124.3 (q,  $^1J_{\text{C-F}} = 270.3$  Hz), 66.5, 51.6;  $^{19}\text{F}$  NMR (282 MHz,  $\text{CDCl}_3$ )  $\delta$  -62.4. The spectroscopic data are in agreement with those previously reported.<sup>[10]</sup>

### 2.3.30 Synthesis and characterization of (*E*)-4-((morpholinoimino)methyl)benzonitrile (**4af**)

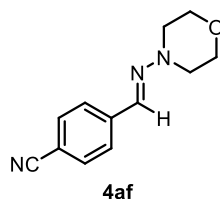

A mixture of 4-formylbenzonitrile (393 mg, 3 mmol, 1.0 equiv.), morpholin-4-amine (322 mg, 3.15 mmol, 1.05 equiv.), MgSO<sub>4</sub> (1.08 g, 9 mmol, 3 equiv.) and DCM (15 mL) was stirred at room temperature for 20 h. Column chromatography on silica gel (eluent: hexane to hexane/ethyl acetate = 3:1) afforded **4af** in 98% yield (634 mg) as a white solid. <sup>1</sup>H NMR (300 MHz, CDCl<sub>3</sub>) δ 7.68-7.65 (m, 2H), 7.62-7.59 (m, 2H), 7.50 (s, 1H), 3.91-3.88 (m, 4H), 3.26-3.22 (m, 4H); <sup>13</sup>C NMR (75 MHz, CDCl<sub>3</sub>) δ 140.6, 132.55, 132.50, 126.4, 119.2, 111.0, 66.4, 51.5. The spectroscopic data are in agreement with those previously reported.<sup>[10]</sup>

### 2.3.31 Synthesis and characterization of (*E*)-1-(4-chlorophenyl)-*N*-morpholinomethanimine (**4ag**)

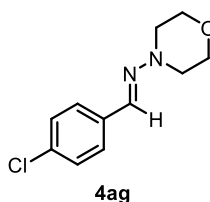

A mixture of 4-chlorobenzaldehyde (281 mg, 2 mmol, 1.0 equiv.), morpholin-4-amine (214 mg, 2.1 mmol, 1.05 equiv.), MgSO<sub>4</sub> (722 mg, 6 mmol, 3 equiv.) and DCM (10 mL) was stirred at room temperature for 15 h. Column chromatography on silica gel (eluent: hexane to hexane/ethyl acetate = 5:1) afforded **4ag** in 97% yield (438 mg) as a white solid. <sup>1</sup>H NMR (300 MHz, CDCl<sub>3</sub>) δ 7.52-7.48 (m, 3H), 7.31-7.28 (m, 2H), 3.87-3.84 (m, 4H), 3.16-3.13 (m, 4H); <sup>13</sup>C NMR (75 MHz, CDCl<sub>3</sub>) δ 134.6, 134.4, 133.8, 128.8, 127.3, 66.4, 51.7. The spectroscopic data are in agreement with those previously reported.<sup>[10]</sup>

### 2.3.32 Synthesis and characterization of (*E*)-1-(2-fluorophenyl)-*N*-morpholinomethanimine (**4ah**)

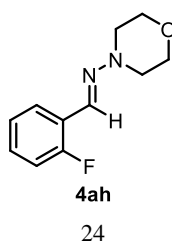

A mixture of 2-fluorobenzaldehyde (248 mg, 2 mmol, 1.0 equiv.), morpholin-4-amine (214 mg, 2.1 mmol, 1.05 equiv.), MgSO<sub>4</sub> (722 mg, 6 mmol, 3 equiv.) and DCM (10 mL) was stirred at room temperature for 16 h. Column chromatography on silica gel (eluent: hexane to hexane/ethyl acetate = 4:1) afforded **4ah** in 99% yield (412 mg) as a white solid. <sup>1</sup>H NMR (300 MHz, CDCl<sub>3</sub>) δ 7.89 (t, *J* = 7.7 Hz, 1H), 7.78 (s, 1H), 7.26-6.99 (m, 3H), 3.89-3.86 (m, 4H), 3.21-3.18 (m, 4H); <sup>13</sup>C NMR (75 MHz, CDCl<sub>3</sub>) δ 160.7 (d, *J* = 249.0 Hz), 129.6 (d, *J* = 8.4 Hz), 128.7 (d, *J* = 5.2 Hz), 125.9 (d, *J* = 3.3 Hz), 124.3 (d, *J* = 3.4 Hz), 123.8 (d, *J* = 9.9 Hz), 115.6 (d, *J* = 21.2 Hz), 66.5, 51.8; <sup>19</sup>F NMR (282 MHz, CDCl<sub>3</sub>) δ -122.8. The spectroscopic data are in agreement with those previously reported.<sup>[14]</sup>

### 2.3.33 Synthesis and characterization of (*E*)-1-(3-bromophenyl)-*N*-morpholinomethanimine (**4ai**)

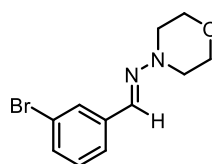

**4ai**

A mixture of 3-bromobenzaldehyde (370 mg, 2 mmol, 1.0 equiv.), morpholin-4-amine (214 mg, 2.1 mmol, 1.05 equiv.), MgSO<sub>4</sub> (722 mg, 6 mmol, 3 equiv.) and DCM (10 mL) was stirred at room temperature for 16 h. Column chromatography on silica gel (eluent: hexane to hexane/ethyl acetate = 5:1) afforded **4ai** in 95% yield (512 mg) as a white solid. <sup>1</sup>H NMR (300 MHz, CDCl<sub>3</sub>) δ 7.79-7.77 (m, 1H), 7.48-7.46 (m, 2H), 7.40-7.37 (m, 1H), 7.20 (t, *J* = 7.8 Hz, 1H), 3.89-3.86 (m, 4H), 3.19-3.16 (m, 4H); <sup>13</sup>C NMR (75 MHz, CDCl<sub>3</sub>) δ 138.3, 133.9, 131.1, 130.2, 128.9, 125.0, 123.0, 66.5, 51.8. The spectroscopic data are in agreement with those previously reported.<sup>[14]</sup>

### 2.3.34 Synthesis and characterization of (*E*)-*N*-morpholino-1-(*o*-tolyl)methanimine (**4aj**)

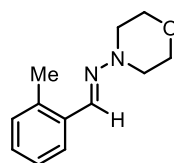

**4aj**

A mixture of 2-methylbenzaldehyde (240 mg, 2 mmol, 1.0 equiv.), morpholin-4-amine (214 mg, 2.1 mmol, 1.05 equiv.), MgSO<sub>4</sub> (722 mg, 6 mmol, 3 equiv.) and DCM (10 mL) was stirred at room temperature for 24 h. Column chromatography on silica gel (eluent: hexane to hexane/ethyl acetate = 5:1) afforded **4aj** in 99% yield (404 mg) as a white solid. <sup>1</sup>H NMR (300

MHz, CDCl<sub>3</sub>)  $\delta$  7.79-7.76 (m, 2H), 7.19-7.10 (m, 3H), 3.88-3.84 (m, 4H), 3.17-3.13 (m, 4H), 2.40 (s, 3H); <sup>13</sup>C NMR (75 MHz, CDCl<sub>3</sub>)  $\delta$  135.4, 134.8, 133.9, 130.6, 128.1, 126.2, 125.6, 66.4, 52.0, 19.6. The spectroscopic data are in agreement with those previously reported.<sup>[10]</sup>

### 2.3.35 Synthesis and characterization of methyl (*E*)-3-[(morpholinoimino)methyl]benzoate (**4ak**)

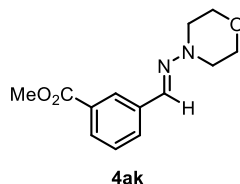

A mixture of methyl 3-formylbenzoate (328 mg, 2 mmol, 1.0 equiv.), morpholin-4-amine (214 mg, 2.1 mmol, 1.05 equiv.), MgSO<sub>4</sub> (6 mmol, 722 mg, 3 equiv.) and DCM (10 mL) was stirred at room temperature for 22 h. Column chromatography on silica gel (eluent: hexane to hexane/ethyl acetate = 3:1) afforded **4ak** in 99% yield (490 mg) as a white solid. <sup>1</sup>H NMR (300 MHz, CDCl<sub>3</sub>)  $\delta$  8.22 (s, 1H), 7.94 (d, *J* = 7.7 Hz, 1H), 7.82 (d, *J* = 7.8 Hz, 1H), 7.59 (s, 1H), 7.41 (t, *J* = 7.8 Hz, 1H), 3.97 (s, 3H), 3.92-3.86 (m, 4H), 3.21-3.18 (m, 4H); <sup>13</sup>C NMR (75 MHz, CDCl<sub>3</sub>)  $\delta$  167.0, 136.5, 134.6, 130.6, 130.1, 129.2, 128.7, 127.6, 66.5, 52.2, 51.7. The spectroscopic data are in agreement with those previously reported.<sup>[16]</sup>

### 2.3.36 Synthesis and characterization of (*E*)-*N*-morpholino-1-{4-[(trimethylsilyl)ethynyl]phenyl}methanimine (**4al**)

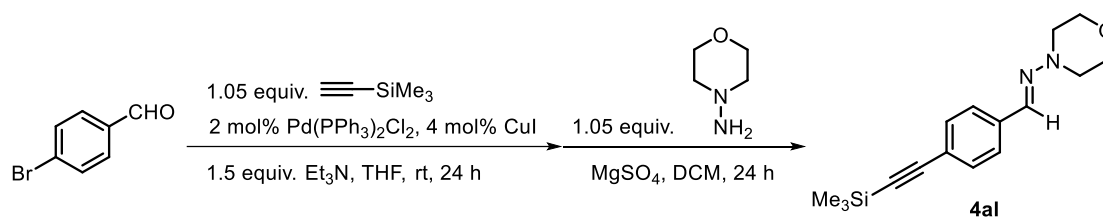

To a 100 mL oven-dried Schlenk tube equipped with a stirring bar was added Pd(PPh<sub>3</sub>)<sub>2</sub>Cl<sub>2</sub> (56.2 mg, 0.08 mmol, 2 mol%), CuI (30.5 mg, 0.16 mmol, 4 mol%) and 4-bromobenzaldehyde (740 mg, 4.0 mmol, 1.0 equiv.). The Schlenk tube was then evacuated and backfilled with N<sub>2</sub> three times. After this, 30 mL of dry THF was added under N<sub>2</sub>, followed by the addition of ethynyltrimethylsilane (582  $\mu$ L, 4.2 mmol, 1.05 equiv.) and triethylamine (834  $\mu$ L, 6 mmol, 1.5 equiv.). The resulting reaction mixture was stirred at room temperature for 24 h, then filtered through a pad of celite. The obtained organic phase was extracted with ethyl acetate, washed with brine and dried over Na<sub>2</sub>SO<sub>4</sub>. The solvent was evaporated under reduced pressure and the residue purified by column chromatography on silica gel (eluent: hexane/ethyl acetate = 40:1)

to afford 4-((trimethylsilyl)ethynyl)benzaldehyde, which was used for the next step.

Morpholin-4-amine (429 mg, 4.2 mmol, 1.05 equiv.) and MgSO<sub>4</sub> (1.44 g, 12 mmol, 3 equiv.) were added sequentially to a stirred solution of the above obtained aldehyde in DCM (30 mL). The resulting solution was stirred at room temperature for 24 h, then filtered through a pad of celite. The solvent was removed under vacuum and the residue was purified by column chromatography on silica gel (eluent: hexane to hexane/ethyl acetate = 5:1) to afford **4al** in 46% yield (530 mg) as a light yellow solid. <sup>1</sup>H NMR (300 MHz, CDCl<sub>3</sub>) δ 7.54-7.51 (m, 3H), 7.46-7.42 (m, 2H), 3.89-3.86 (m, 4H), 3.20-3.16 (m, 4H), 0.25 (s, 9H); <sup>13</sup>C NMR (75 MHz, CDCl<sub>3</sub>) δ 136.2, 135.0, 132.3, 126.0, 122.8, 105.3, 95.3, 66.5, 51.8, 0.1. The spectroscopic data are in agreement with those previously reported.<sup>[16]</sup>

### 2.3.37 Synthesis and characterization of (*E*)-1,1-dimethyl-2-[3-(trifluoromethyl)benzylidene]hydrazine (**4am**)

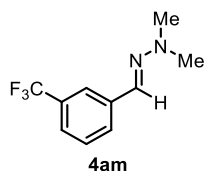

A mixture of 3-(trifluoromethyl)benzaldehyde (348 mg, 2 mmol, 1.0 equiv.), 1,1-dimethylhydrazine (126 mg, 2.1 mmol, 1.05 equiv.), MgSO<sub>4</sub> (722 mg, 6 mmol, 3 equiv.) and DCM (10 mL) was stirred at room temperature for 24 h. Column chromatography on silica gel (eluent: hexane to hexane/ethyl acetate = 20:1) afforded **4am** in 74% yield (320 mg) as a colorless oil. <sup>1</sup>H NMR (300 MHz, CDCl<sub>3</sub>) δ 7.82-7.81 (m, 1H), 7.72-7.66 (m, 1H), 7.45-7.37 (m, 2H), 7.18 (s, 1H), 3.01 (s, 6H); <sup>13</sup>C NMR (75 MHz, CDCl<sub>3</sub>) δ 138.0, 131.0 (q, *J* = 32.1 Hz), 130.0, 129.0, 128.6 (q, *J* = 1.4 Hz), 124.4 (q, *J* = 272.3 Hz), 123.5 (q, *J* = 3.9 Hz), 122.2 (q, *J* = 3.9 Hz), 42.8; IR (neat): 2864, 1566, 1445, 1324, 1280, 1207, 1160, 1116, 1093, 1066, 1039, 908, 796, 696, 666, 632, 536 cm<sup>-1</sup>; HRMS calculated *m/z* for C<sub>10</sub>H<sub>12</sub>F<sub>3</sub>N<sub>2</sub><sup>+</sup> [M+H]<sup>+</sup>: 217.0947, found (ESI) 217.0948.

### 2.3.38 Synthesis and characterization of (*E*)-1-([1,1'-biphenyl]-4-yl)-*N*-(piperidin-1-yl)-methanimine (**4an**)

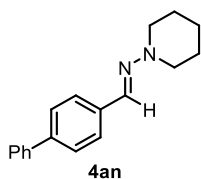

A mixture of [1,1'-biphenyl]-4-carbaldehyde (729 mg, 4 mmol, 1.0 equiv.), piperidin-1-



amine (401 mg, 4 mmol, 1.0 equiv.), MgSO<sub>4</sub> (1.44 g, 12 mmol, 3 equiv.) and DCM (20 mL) was stirred at room temperature for 24 h. Column chromatography on silica gel (eluent: hexane to hexane/ethyl acetate = 8:1) afforded **4an** in 97% yield (1.03 g) as a white solid. <sup>1</sup>H NMR (300 MHz, CDCl<sub>3</sub>) δ 7.67-7.55 (m, 7H), 7.45-7.40 (m, 2H), 7.35-7.29 (m, 1H), 3.20-3.16 (m, 4H), 1.79-1.72 (m, 4H), 1.60-1.50 (m, 2H); <sup>13</sup>C NMR (75 MHz, CDCl<sub>3</sub>) δ 141.0, 140.5, 135.9, 134.2, 128.9, 127.34, 127.29, 127.1, 126.5, 52.2, 25.3, 24.3; IR (neat): 3030, 2936, 2818, 1739, 1486, 1445, 1377, 1363, 1354, 1229, 1079, 987, 898, 884, 857, 833, 758, 721, 690, 556, 514, 491 cm<sup>-1</sup>; HRMS calculated *m/z* for C<sub>18</sub>H<sub>21</sub>N<sub>2</sub><sup>+</sup> [M+H]<sup>+</sup>: 265.1699, found (ESI) 265.1702.

### 2.3.39 Synthesis and characterization of (*E*)-2-([1,1'-biphenyl]-4-ylmethylene)-1,1-diphenylhydrazine (**4ap**)

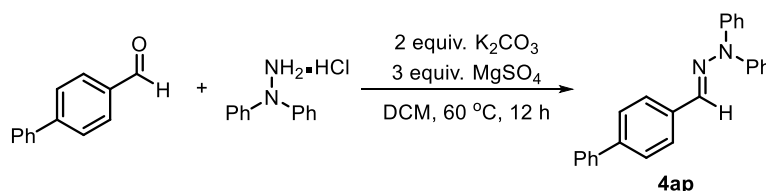

To a solution of [1,1'-biphenyl]-4-carbaldehyde (364 mg, 2 mmol, 1.0 equiv.) in dry DCM (30 mL) was added *N,N*-diphenylhydrazinium chloride (441 mg, 2 mmol, 1.0 equiv.), anhydrous MgSO<sub>4</sub> (722 mg, 6 mmol, 3 equiv.) and K<sub>2</sub>CO<sub>3</sub> (553 mg, 4 mmol, 2 equiv.). The resulting mixture was refluxed at 60 °C for 12 h. Then, the reaction mixture was filtered through a pad of celite. The solvent was removed under vacuum and the residue was purified by column chromatography on silica gel (eluent: hexane to hexane/ethyl acetate = 20:1) to afford **4ap** in 95% yield (663 mg) as a white solid. <sup>1</sup>H NMR (300 MHz, CDCl<sub>3</sub>) δ 7.70-7.65 (m, 2H), 7.62-7.55 (m, 4H), 7.46-7.40 (m, 6H), 7.36-7.30 (m, 1H), 7.23-7.17 (m, 7H); <sup>13</sup>C NMR (75 MHz, CDCl<sub>3</sub>) δ 143.8, 140.9, 140.8, 135.4, 135.2, 130.0, 128.9, 127.5, 127.3, 127.1, 126.8, 124.7, 122.7; IR (neat): 3060, 3027, 1585, 1574, 1494, 1483, 1382, 1297, 1234, 1202, 1169, 1092, 1068, 907, 831, 765, 744, 725, 697, 687, 644, 623, 574, 554, 508, 489 cm<sup>-1</sup>; HRMS calculated *m/z* for C<sub>25</sub>H<sub>21</sub>N<sub>2</sub><sup>+</sup> [M+H]<sup>+</sup>: 349.1699, found (ESI) 349.1689.

## 2.4 Optimizations details for the synthesis of triazoles 5

### 2.4.1 Evaluation of photocatalysts

To a 10 mL oven-dried Schlenk tube equipped with a stirring bar was added photocatalyst, NaHCO<sub>3</sub> (50.4 mg, 0.6 mmol, 3.0 equiv.), **1a** (116.1 mg, 0.26 mmol, 1.3 equiv.) and **4aa** (53.3 mg, 0.2 mmol, 1.0 equiv.). The Schlenk tube was then evacuated and backfilled with N<sub>2</sub> three times after which dry acetonitrile (4 mL) was added under N<sub>2</sub>. The tube was sealed and degassed by three freeze-pump-thaw cycles under N<sub>2</sub>. After that, the reaction tube was placed in a photoreactor equipped with blue LED strips (wavelength range: 430-435 nm, 28 W). A mini-fan was kept on top to maintain room temperature. The resulting mixture was stirred at room temperature for the appropriate time as indicated in Table S1. Then, the reaction was quenched with water, extracted with DCM, washed with brine and the organic phase was dried over anhydrous Na<sub>2</sub>SO<sub>4</sub>. After filtration, the solvent was evaporated under the reduced pressure and the residue was subjected to column chromatography on silica gel (eluent: hexane to hexane/ethyl acetate = 3:1). The fractions containing **5ac** were all combined. The solvent was then removed under the reduced pressure to afford a residue. The NMR yields were obtained by <sup>1</sup>H NMR analysis of the residue using CH<sub>2</sub>Br<sub>2</sub> (0.2 mmol, 14.0 μL, 1.0 equiv.) as the internal standard in CDCl<sub>3</sub>. The results were summarized in Table S1.

**Table S1: Evaluation of photocatalysts**

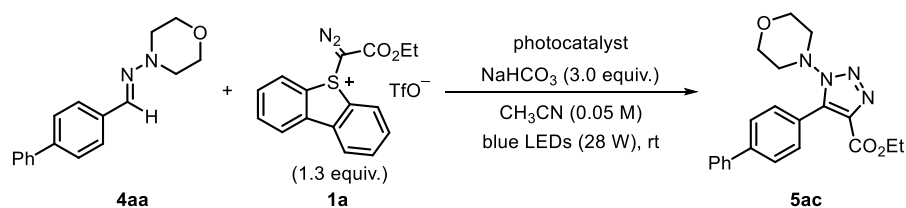

| entry | photocatalyst (mol%)                                         | time (h) | yield (%) <sup>[a]</sup> |
|-------|--------------------------------------------------------------|----------|--------------------------|
| 1     | no photocatalyst                                             | 16       | 11                       |
| 2     | Ru(bpy) <sub>3</sub> (PF <sub>6</sub> ) <sub>2</sub> (1)     | 22       | 57                       |
| 3     | Ir(ppy) <sub>3</sub> (1)                                     | 21       | 13                       |
| 4     | Ir(ppy) <sub>2</sub> (dtbbpy)PF <sub>6</sub> (1)             | 21       | 17                       |
| 5     | 4CzIPN (1)                                                   | 11       | 20                       |
| 6     | Ru(bpz) <sub>3</sub> (PF <sub>6</sub> ) <sub>2</sub> (1)     | 15       | 54                       |
| 7     | Ru(phen) <sub>3</sub> Cl <sub>2</sub> ·6H <sub>2</sub> O (1) | 15       | 52                       |
| 8     | Ru(bpy) <sub>3</sub> (PF <sub>6</sub> ) <sub>2</sub> (3)     | 14       | 58                       |
| 9     | Ru(bpy) <sub>3</sub> (PF <sub>6</sub> ) <sub>2</sub> (5)     | 14       | 59                       |
| 10    | Mes-Acr-Me <sup>+</sup> ClO <sub>4</sub> <sup>-</sup> (5)    | 15       | 59                       |

[a] <sup>1</sup>H NMR yield with CH<sub>2</sub>Br<sub>2</sub> as the internal standard.

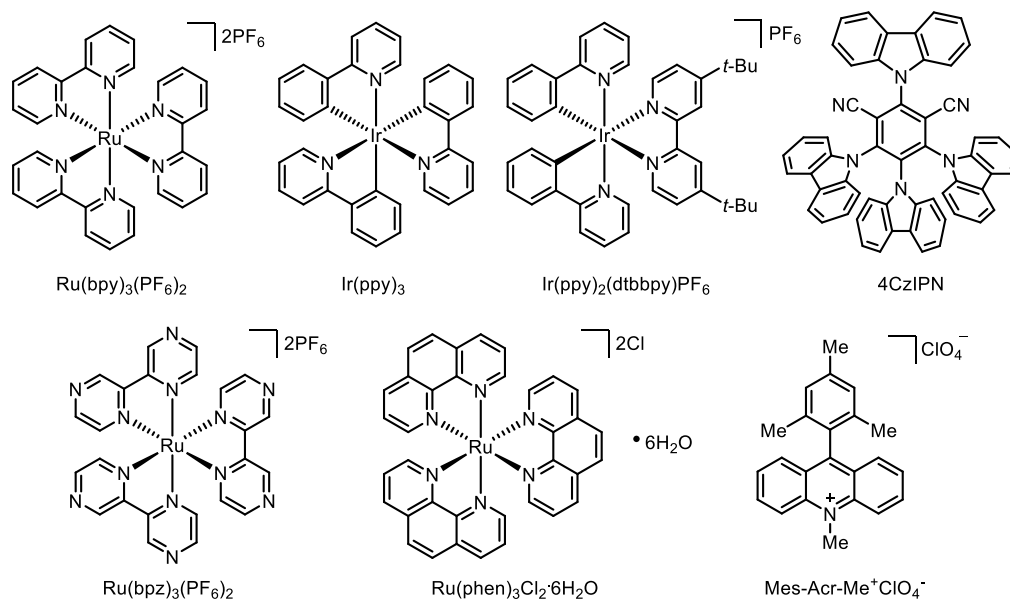

## 2.4.2 Evaluation of solvents

To a 10 mL oven-dried Schlenk tube equipped with a stirring bar was added  $\text{Ru}(\text{bpy})_3(\text{PF}_6)_2$  (1.7 mg, 0.002 mmol, 1 mol%),  $\text{NaHCO}_3$  (33.6 mg, 0.4 mmol, 2.0 equiv.), **1a** (116.1 mg, 0.26 mmol, 1.3 equiv.) and **4aa** (53.3 mg, 0.2 mmol, 1.0 equiv.). The Schlenk tube was then evacuated and backfilled with  $\text{N}_2$  three times after which dry solvents (4 mL) was added under  $\text{N}_2$ . The tube was sealed and degassed by three freeze-pump-thaw cycles under  $\text{N}_2$ . After that, the reaction tube was placed in a photoreactor equipped with blue LED strips (wavelength range: 430-435 nm, 28 W). A mini-fan was kept on top to maintain room temperature. The resulting mixture was stirred at room temperature for the appropriate time as indicated in Table S2. Then, the reaction was quenched with water, extracted with DCM, washed with brine and the organic phase was dried over anhydrous  $\text{Na}_2\text{SO}_4$ . After filtration, the solvent was evaporated under the reduced pressure and the residue was subjected to column chromatography on silica gel (eluent: hexane to hexane/ethyl acetate = 3:1). The fractions containing **5ac** were all combined. The solvent was then removed under the reduced pressure to afford a residue. The NMR yields were obtained by  $^1\text{H}$  NMR analysis of the residue using  $\text{CH}_2\text{Br}_2$  (0.2 mmol, 14.0  $\mu\text{L}$ , 1.0 equiv.) as the internal standard in  $\text{CDCl}_3$ . The results were summarized in Table S2.

**Table S2: Evaluation of solvents**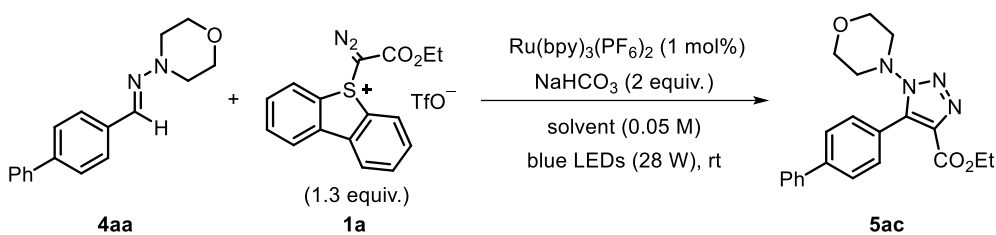

| entry | solvent                                 | time (h) | yield (%) <sup>[a]</sup> |
|-------|-----------------------------------------|----------|--------------------------|
| 1     | $\text{CH}_3\text{CN}$                  | 22       | 57                       |
| 2     | THF                                     | 12       | 15                       |
| 3     | MeOH                                    | 12       | 37                       |
| 4     | Acetone                                 | 15       | 50                       |
| 5     | DMF                                     | 13       | 30                       |
| 6     | DMSO                                    | 13       | 0                        |
| 7     | $\text{CHCl}_3$                         | 13       | 19                       |
| 8     | $\text{CH}_3\text{CN}/\text{DCE}$ (1:1) | 19       | 54                       |

[a]  $^1\text{H}$  NMR yield with  $\text{CH}_2\text{Br}_2$  as the internal standard.

### 2.4.3 Evaluation of bases and reagents

To a 10 mL oven-dried Schlenk tube equipped with a stirring bar was added  $\text{Ru}(\text{bpy})_3(\text{PF}_6)_2$  (1.7 mg, 0.002 mmol, 1 mol%), bases, **1** (0.26 mmol, 1.3 equiv.) and **4aa** (53.3 mg, 0.2 mmol, 1.0 equiv.). The Schlenk tube was then evacuated and backfilled with  $\text{N}_2$  three times after which dry  $\text{CH}_3\text{CN}$  (4 mL) was added under  $\text{N}_2$ . The tube was sealed and degassed by three freeze-pump-thaw cycles under  $\text{N}_2$ . After that, the reaction tube was placed in a photoreactor equipped with blue LED strips (wavelength range: 430-435 nm, 12 W). A mini-fan was kept on top to maintain room temperature. The resulting mixture was stirred at room temperature for the appropriate time as indicated in Table S3. Then, the reaction mixture was quenched with water, extracted with DCM, washed with brine and the organic phase was dried over anhydrous  $\text{Na}_2\text{SO}_4$ . After filtration, the solvent was evaporated under the reduced pressure and the residue was subjected to column chromatography on silica gel (eluent: hexane to hexane/ethyl acetate = 3:1). The fractions containing **5ac** were all combined. The solvent was then removed under the reduced pressure to afford a residue. The NMR yields were obtained by  $^1\text{H}$  NMR analysis of the residue using  $\text{CH}_2\text{Br}_2$  (0.2 mmol, 14.0  $\mu\text{L}$ , 1.0 equiv.) as the internal standard in  $\text{CDCl}_3$ . The results were summarized in Table S3.

**Table S3: Evaluation of bases and reagents 1**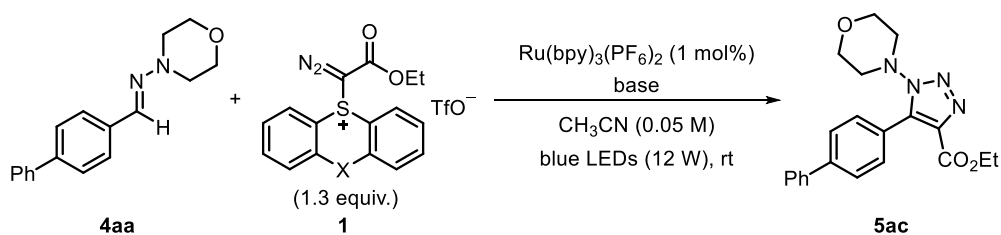

| entry             | reagent 1 | base (equiv.)                 | time (h) | yield (%) <sup>[a]</sup> |
|-------------------|-----------|-------------------------------|----------|--------------------------|
| 1                 | <b>1a</b> | $\text{NaHCO}_3$ (2)          | 15       | 57                       |
| 2                 | <b>1a</b> | $\text{Cs}_2\text{CO}_3$ (2)  | 8        | 9                        |
| 3                 | <b>1a</b> | $\text{Na}_3\text{PO}_4$ (2)  | 8        | 47                       |
| 4                 | <b>1a</b> | $\text{K}_2\text{CO}_3$ (2)   | 18       | 36                       |
| 5                 | <b>1a</b> | $\text{K}_3\text{PO}_4$ (2)   | 18       | 31                       |
| 6                 | <b>1a</b> | $\text{KH}_2\text{PO}_4$ (2)  | 18       | 30                       |
| 7                 | <b>1a</b> | $\text{Na}_2\text{HPO}_4$ (2) | 18       | 47                       |
| 8                 | <b>1a</b> | $\text{PhCO}_2\text{Na}$ (2)  | 19       | 24                       |
| 9                 | <b>1a</b> | $\text{KHCO}_3$ (2)           | 19       | 43                       |
| 10                | <b>1a</b> | $\text{NaOAc}$ (2)            | 19       | 30                       |
| 11                | <b>1a</b> | $\text{NaHCO}_3$ (3)          | 17       | 57                       |
| 12                | <b>1a</b> | no base                       | 20       | 8                        |
| 13 <sup>[b]</sup> | <b>1a</b> | $\text{NaHCO}_3$ (3)          | 17       | 55                       |
| 14                | <b>1c</b> | $\text{NaHCO}_3$ (3)          | 17       | 56                       |
| 15                | <b>1d</b> | $\text{NaHCO}_3$ (3)          | 11       | 41                       |
| 16 <sup>[c]</sup> | <b>1a</b> | $\text{NaHCO}_3$ (3)          | 10       | 20                       |

[a] <sup>1</sup>H NMR yield with  $\text{CH}_2\text{Br}_2$  as the internal standard. [b] 5 mol%  $\text{Zn}(\text{NTf}_2)_2$  was added. [c] A solution of **1a** in  $\text{CH}_3\text{CN}$  (2 mL) was added by a syringe pump over 3 h.

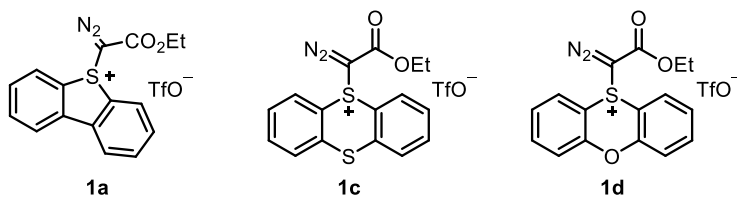

#### 2.4.4 Evaluation of appropriate stoichiometry

To a 10 mL oven-dried Schlenk tube equipped with a stirring bar was added  $\text{Ru}(\text{bpy})_3(\text{PF}_6)_2$  (1.7 mg, 0.002 mmol, 1 mol%),  $\text{NaHCO}_3$  (33.6 mg, 0.4 mmol, 2.0 equiv.), **1a** and **4aa**. The Schlenk tube was then evacuated and backfilled with  $\text{N}_2$  three times after which dry  $\text{CH}_3\text{CN}$  (4 mL) was added under  $\text{N}_2$ . The tube was sealed and degassed by three freeze-pump-thaw cycles under  $\text{N}_2$ . After that, the reaction tube was placed in a photoreactor equipped with blue LED strips (wavelength range: 430-435 nm, 28 W). A mini-fan was kept on top to maintain room temperature. The resulting mixture was stirred at room temperature for the appropriate time as

indicated in Table S4. Then, the reaction mixture was quenched with water, extracted with DCM, washed with brine and the organic phase was dried over anhydrous Na<sub>2</sub>SO<sub>4</sub>. After filtration, the solvent was evaporated under the reduced pressure and the residue was subjected to column chromatography on silica gel (eluent: hexane to hexane/ethyl acetate = 3:1). The fractions containing **5ac** were all combined. The solvent was then removed under the reduced pressure to afford a residue. The NMR yields were obtained by <sup>1</sup>H NMR analysis of the residue using CH<sub>2</sub>Br<sub>2</sub> (0.2 mmol, 14.0 μL, 1.0 equiv.) as the internal standard in CDCl<sub>3</sub>. The results were summarized in Table S4.

**Table S4: Evaluation of stoichiometry**

| entry | equiv. <b>4aa</b> | equiv. <b>1a</b> | time (h) | yield (%) <sup>[a]</sup> |
|-------|-------------------|------------------|----------|--------------------------|
| 1     | 1.3               | 1.0              | 22       | 22                       |
| 2     | 1.0               | 1.2              | 19       | 54                       |
| 3     | 1.0               | 1.3              | 22       | 57                       |
| 4     | 1.0               | 1.5              | 13       | 51                       |

[a] <sup>1</sup>H NMR yield with CH<sub>2</sub>Br<sub>2</sub> as the internal standard.

#### 2.4.5 Evaluation of additives and concentration

To a 10 mL oven-dried Schlenk tube equipped with a stirring bar was added Ru(bpy)<sub>3</sub>(PF<sub>6</sub>)<sub>2</sub> (1.7 mg, 0.002 mmol, 1 mol%), NaHCO<sub>3</sub> (50.4 mg, 0.6 mmol, 3.0 equiv.), **1a** (116.1 mg, 0.26 mmol, 1.3 equiv.), **4aa** (53.3 mg, 0.2 mmol, 1.0 equiv.) and additives. The Schlenk tube was then evacuated and backfilled with N<sub>2</sub> three times after which dry CH<sub>3</sub>CN was added under N<sub>2</sub>. The tube was sealed and degassed by three freeze-pump-thaw cycles under N<sub>2</sub>. After that, the reaction tube was placed in a photoreactor equipped with blue LED strips (wavelength range: 430-435 nm, 28 W). A mini-fan was kept on top to maintain room temperature. The resulting mixture was stirred at room temperature for the appropriate time as indicated in Table S5. Then, the reaction was quenched with water, extracted with DCM, washed with brine and the organic phase was dried over anhydrous Na<sub>2</sub>SO<sub>4</sub>. After filtration, the solvent was evaporated under the reduced pressure and the residue was subjected to column chromatography on silica gel (eluent: hexane to hexane/ethyl acetate = 3:1). The fractions containing **5ac** were all combined. The solvent was then removed under the reduced pressure to afford a residue. The NMR yields were

obtained by  $^1\text{H}$  NMR analysis of the residue using  $\text{CH}_2\text{Br}_2$  (0.2 mmol, 14.0  $\mu\text{L}$ , 1.0 equiv.) as the internal standard in  $\text{CDCl}_3$ . The results were summarized in Table S5.

**Table S5: Evaluation of additives and concentration**

| entry            | concentration <b>4aa</b> /(mol/L) | additive (equiv.) | time (h) | yield (%) <sup>[a]</sup> |
|------------------|-----------------------------------|-------------------|----------|--------------------------|
| 1                | 0.05                              | -                 | 22       | 57                       |
| 2 <sup>[b]</sup> | 0.05                              | 4Å MS             | 17       | 56                       |
| 3                | 0.05                              | MgO (3.0)         | 17       | 54                       |
| 4                | 0.025                             | -                 | 17       | 57                       |
| 5                | 0.1                               | -                 | 21       | 53                       |

[a]  $^1\text{H}$  NMR yield with  $\text{CH}_2\text{Br}_2$  as the internal standard. [b] 50 mg 4Å MS was used.

#### 2.4.6 Evaluation of light sources

To a 10 mL oven-dried Schlenk tube equipped with a stirring bar was added  $\text{Ru}(\text{bpy})_3(\text{PF}_6)_2$  (1.7 mg, 0.002 mmol, 1 mol%),  $\text{NaHCO}_3$  (50.4 mg, 0.6 mmol, 3.0 equiv.), **1a** (116.1 mg, 0.26 mmol, 1.3 equiv.) and **4aa** (53.3 mg, 0.2 mmol, 1.0 equiv.). The Schlenk tube was then evacuated and backfilled with  $\text{N}_2$  three times after which dry  $\text{CH}_3\text{CN}$  (4 mL) was added under  $\text{N}_2$ . The tube was sealed and degassed by three freeze-pump-thaw cycles under  $\text{N}_2$ . After that, the reaction tube was placed in a photoreactor equipped with blue or white LED strips. A mini-fan was kept on top to maintain room temperature. The resulting mixture was stirred at room temperature for the appropriate time as indicated in Table S6. Then, the reaction was quenched with water, extracted with DCM, washed with brine and the organic phase was dried over anhydrous  $\text{Na}_2\text{SO}_4$ . After filtration, the solvent was evaporated under the reduced pressure and the residue was subjected to column chromatography on silica gel (eluent: hexane to hexane/ethyl acetate = 3:1). The fractions containing **5ac** were all combined. The solvent was then removed under the reduced pressure to afford a residue. The NMR yields were obtained by  $^1\text{H}$  NMR analysis of the residue using  $\text{CH}_2\text{Br}_2$  (0.2 mmol, 14.0  $\mu\text{L}$ , 1.0 equiv.) as the internal standard in  $\text{CDCl}_3$ . The results were summarized in Table S6.

**Table S6: Evaluation of light sources**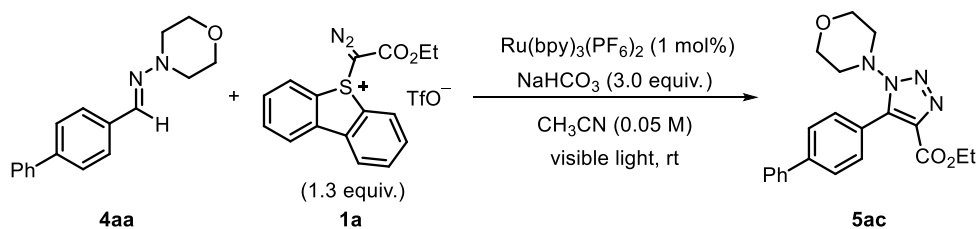

| entry | visible light    | time (h) | yield (%) <sup>[a]</sup> |
|-------|------------------|----------|--------------------------|
| 1     | no light         | 16       | 0                        |
| 2     | blue LEDs (5 W)  | 15       | 55                       |
| 3     | blue LEDs (12 W) | 17       | 57                       |
| 4     | blue LEDs (28 W) | 22       | 57                       |
| 5     | white LEDs       | 16       | 57                       |

[a] <sup>1</sup>H NMR yield with  $\text{CH}_2\text{Br}_2$  as the internal standard.

### 2.4.7 Evaluation of hydrazones

To a 10 mL oven-dried Schlenk tube equipped with a stirring bar was added  $\text{Ru}(\text{bpy})_3(\text{PF}_6)_2$  (1.7 mg, 0.002 mmol, 1 mol%),  $\text{NaHCO}_3$  (50.4 mg, 0.6 mmol, 3.0 equiv.), **1a** (116.1 mg, 0.26 mmol, 1.3 equiv.) and **4** (0.2 mmol, 1.0 equiv.). The Schlenk tube was then evacuated and backfilled with  $\text{N}_2$  three times after which dry  $\text{CH}_3\text{CN}$  (4 mL) was added under  $\text{N}_2$ . The tube was sealed and degassed by three freeze-pump-thaw cycles under  $\text{N}_2$ . After that, the reaction tube was placed in a photoreactor equipped with blue LED strips (wavelength range: 430-435 nm, 12 W). A mini-fan was kept on top to maintain room temperature. The resulting mixture was stirred at room temperature for the appropriate time as indicated in Table S7. Then, the reaction was quenched with water, extracted with DCM, washed with brine and the organic phase was dried over anhydrous  $\text{Na}_2\text{SO}_4$ . After filtration, the solvent was evaporated under the reduced pressure and the residue was subjected to column chromatography on silica gel. The fractions containing **5** were all combined. The solvent was then removed under the reduced pressure to afford a residue. The NMR yields were obtained by <sup>1</sup>H NMR analysis of the residue using  $\text{CH}_2\text{Br}_2$  (0.2 mmol, 14.0  $\mu\text{L}$ , 1.0 equiv.) as the internal standard in  $\text{CDCl}_3$ . The results were summarized in Table S7.



**Table S7: Evaluation of hydrazones**

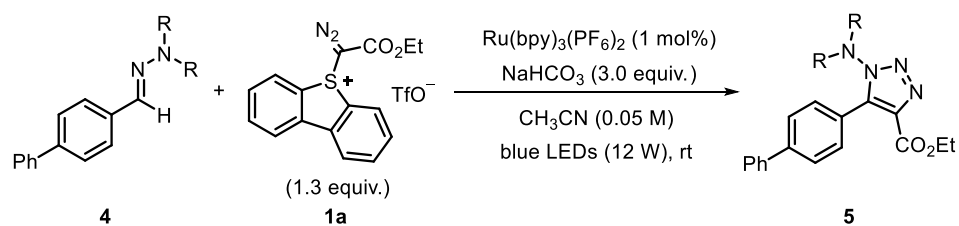

| entry | hydrazone  |  | time (h) | yield (%) <sup>[a]</sup> |
|-------|------------|--|----------|--------------------------|
| 1     | <b>4aa</b> |  | 17       | 57                       |
| 2     | <b>4an</b> |  | 23       | 40                       |
| 3     | <b>4ao</b> |  | 23       | 46                       |
| 4     | <b>4ap</b> |  | 19       | messy                    |
| 5     | <b>4g</b>  |  | 12       | 81 <sup>[b]</sup>        |

[a] <sup>1</sup>H NMR yield with  $\text{CH}_2\text{Br}_2$  as the internal standard. [b] Isolated yield.

## 2.5 Synthesis and characterization of triazoles 5

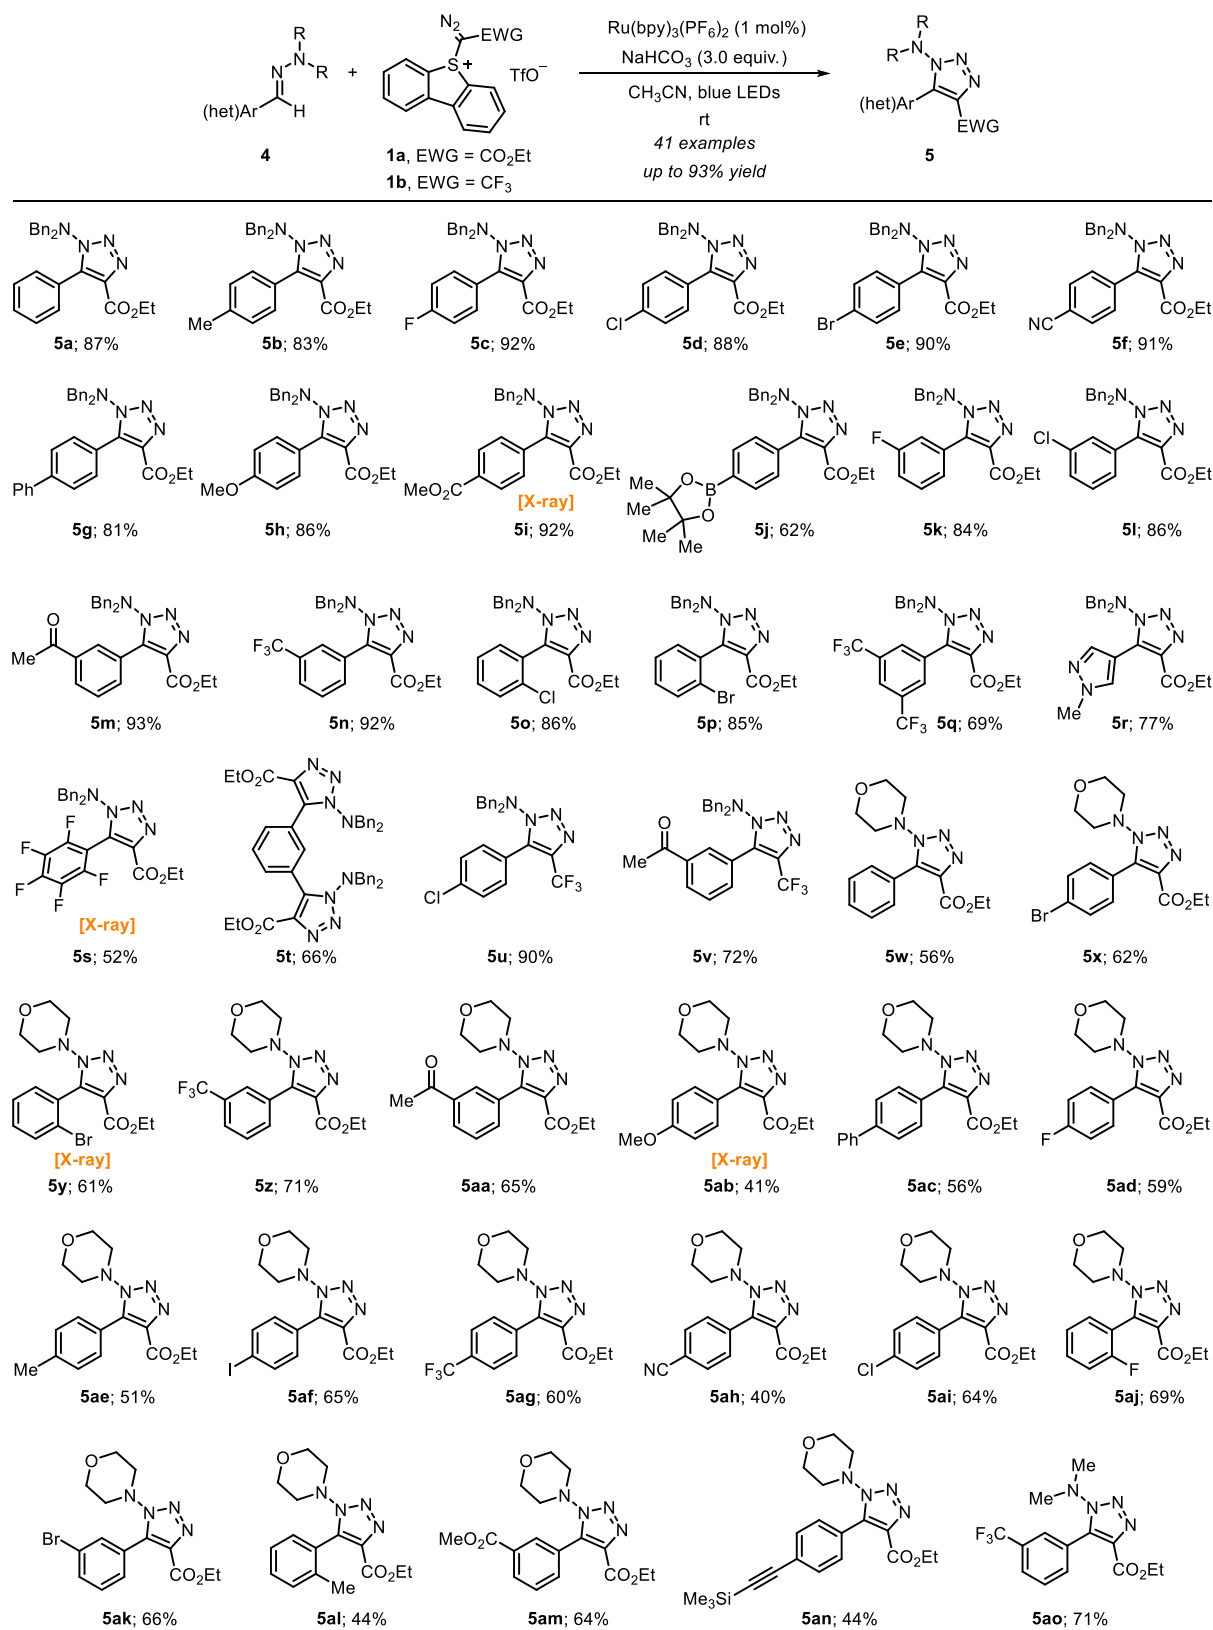

Typical procedure for the photoredox-catalyzed C(sp<sup>2</sup>)-H diazomethylation of hydrazones to triazoles **5**: To a 10 mL oven-dried Schlenk tube equipped with a stirring bar was added Ru(bpy)<sub>3</sub>(PF<sub>6</sub>)<sub>2</sub> (1.7 mg, 0.002 mmol, 1 mol%), NaHCO<sub>3</sub> (50.4 mg, 0.6 mmol, 3.0 equiv.), **1** (0.26 mmol, 1.3 equiv.) and **4** (0.2 mmol, 1.0 equiv.). The Schlenk tube was then evacuated and backfilled with N<sub>2</sub> three times after which dry CH<sub>3</sub>CN (4 mL) was added under N<sub>2</sub>. Then, the reaction tube was placed in a photoreactor equipped with blue LED strips (wavelength range: 430-435 nm, 12 W). A mini-fan was kept on top to maintain room temperature. The resulting mixture was stirred at room temperature for 8-19 hours. Then, the reaction was quenched with water, extracted with DCM, washed with brine and the organic phase was dried over anhydrous Na<sub>2</sub>SO<sub>4</sub>. After filtration, the solvent was removed under the reduced pressure to afford a residue, which was purified by column chromatography on silica gel to afford the desired products.

### 2.5.1 Synthesis and characterization of ethyl 1-(dibenzylamino)-5-phenyl-1*H*-1,2,3-triazole-4-carboxylate (**5a**)

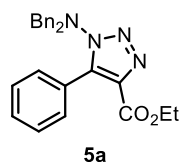

A mixture of Ru(bpy)<sub>3</sub>(PF<sub>6</sub>)<sub>2</sub> (1.7 mg, 0.002 mmol, 1 mol%), NaHCO<sub>3</sub> (50.4 mg, 0.6 mmol, 3.0 equiv.), **1a** (116.1 mg, 0.26 mmol, 1.3 equiv.) and **4a** (60.1 mg, 0.2 mmol, 1.0 equiv.) in CH<sub>3</sub>CN (4 mL) was stirred at room temperature under blue light irradiation for 12 h. Column chromatography on silica gel (eluent: hexane to hexane/ethyl acetate = 4:1) afforded **5a** in 87% yield (71.5 mg) as a colorless oil. <sup>1</sup>H NMR (300 MHz, CDCl<sub>3</sub>) δ 7.38-7.33 (m, 1H), 7.27-7.15 (m, 8H), 7.00-6.96 (m, 4H), 6.46-6.42 (m, 2H), 4.45 (bs, 4H), 4.21 (q, *J* = 7.1 Hz, 2H), 1.20 (t, *J* = 7.1 Hz, 3H); <sup>13</sup>C NMR (75 MHz, CDCl<sub>3</sub>) δ 160.9, 141.7, 134.9, 134.7, 130.1, 129.7, 129.3, 128.6, 128.2, 127.3, 125.2, 62.3, 61.0, 14.0. IR (neat): 3033, 2971, 1724, 1491, 1454, 1428, 1376, 1365, 1335, 1228, 1216, 1193, 1054, 1028, 749, 694 cm<sup>-1</sup>; HRMS (ESI) calcd *m/z* for C<sub>25</sub>H<sub>25</sub>N<sub>4</sub>O<sub>2</sub><sup>+</sup> [M+H]<sup>+</sup>: 413.1972, found 413.1973.

### 2.5.2 Synthesis and characterization of **5b**

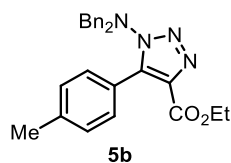

A mixture of Ru(bpy)<sub>3</sub>(PF<sub>6</sub>)<sub>2</sub> (1.7 mg, 0.002 mmol, 1 mol%), NaHCO<sub>3</sub> (50.4 mg, 0.6 mmol,

3.0 equiv.), **1a** (116.1 mg, 0.26 mmol, 1.3 equiv.) and **4b** (62.9 mg, 0.2 mmol, 1.0 equiv.) in CH<sub>3</sub>CN (4 mL) was stirred at room temperature under blue light irradiation for 9 h. Column chromatography on silica gel (eluent: hexane to hexane/ethyl acetate = 4:1) afforded **5b** in 83% yield (70.4 mg) as a colorless oil. <sup>1</sup>H NMR (400 MHz, CDCl<sub>3</sub>, 50 °C) δ 7.22-7.15 (m, 6H), 7.03-6.97 (m, 6H), 6.43-6.41 (m, 2H), 4.43 (bs, 4H), 4.21 (q, *J* = 7.1 Hz, 2H), 2.37 (s, 3H), 1.21 (t, *J* = 7.1 Hz, 3H); <sup>13</sup>C NMR (75 MHz, CDCl<sub>3</sub>) δ 161.0, 141.8, 139.4, 134.9, 134.6, 130.0, 129.7, 128.6, 128.2, 128.0, 122.1, 62.3, 61.0, 21.5, 14.1. IR (neat): 3035, 2971, 1725, 1715, 1455, 1438, 1366, 1334, 1214, 1201, 1183, 1060, 750, 700, 501 cm<sup>-1</sup>; HRMS (ESI) calcd *m/z* for C<sub>26</sub>H<sub>27</sub>N<sub>4</sub>O<sub>2</sub><sup>+</sup> [M+H]<sup>+</sup>: 427.2129, found 427.2128.

### 2.5.3 Synthesis and characterization of ethyl 1-(dibenzylamino)-5-(4-fluorophenyl)-1*H*-1,2,3-triazole-4-carboxylate (**5c**)

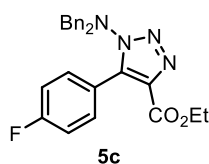

A mixture of Ru(bpy)<sub>3</sub>(PF<sub>6</sub>)<sub>2</sub> (1.7 mg, 0.002 mmol, 1 mol%), NaHCO<sub>3</sub> (50.4 mg, 0.6 mmol, 3.0 equiv.), **1a** (116.1 mg, 0.26 mmol, 1.3 equiv.) and **4c** (63.7 mg, 0.2 mmol, 1.0 equiv.) in CH<sub>3</sub>CN (4 mL) was stirred at room temperature under blue light irradiation for 10 h. Column chromatography on silica gel (eluent: hexane to hexane/ethyl acetate = 4:1) afforded **5c** in 92% yield (78.8 mg) as a colorless oil. <sup>1</sup>H NMR (400 MHz, CDCl<sub>3</sub>, 50 °C) δ 7.26-7.15 (m, 6H), 6.98-6.93 (m, 4H), 6.89-6.84 (m, 2H), 6.41-6.36 (m, 2H), 4.44 (bs, 4H), 4.21 (q, *J* = 7.1 Hz, 2H), 1.20 (t, *J* = 7.1 Hz, 3H); <sup>13</sup>C NMR (75 MHz, CDCl<sub>3</sub>) δ 163.3 (d, <sup>1</sup>*J*<sub>C-F</sub> = 249.8 Hz), 160.8, 140.9, 134.8, 134.6, 132.1 (d, <sup>3</sup>*J*<sub>C-F</sub> = 8.5 Hz), 129.7, 128.6, 128.3, 121.0 (d, <sup>4</sup>*J*<sub>C-F</sub> = 3.5 Hz), 114.4 (d, <sup>2</sup>*J*<sub>C-F</sub> = 21.8 Hz), 62.5, 61.1, 14.1; <sup>19</sup>F NMR (282 MHz, CDCl<sub>3</sub>) δ -111.2. IR (neat): 3033, 2977, 1721, 1498, 1455, 1438, 1378, 1365, 1335, 1295, 1228, 1219, 1192, 1159, 1055, 1028, 848, 835, 814, 793, 752, 730, 697, 615, 514 cm<sup>-1</sup>; HRMS (ESI) calcd *m/z* for C<sub>25</sub>H<sub>24</sub>FN<sub>4</sub>O<sub>2</sub><sup>+</sup> [M+H]<sup>+</sup>: 431.1878, found 431.1876.

### 2.5.4 Synthesis and characterization of ethyl 5-(4-chlorophenyl)-1-(dibenzylamino)-1*H*-1,2,3-triazole-4-carboxylate (**5d**)

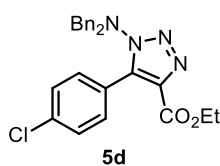

A mixture of Ru(bpy)<sub>3</sub>(PF<sub>6</sub>)<sub>2</sub> (1.7 mg, 0.002 mmol, 1 mol%), NaHCO<sub>3</sub> (50.4 mg, 0.6 mmol, 3.0 equiv.), **1a** (116.1 mg, 0.26 mmol, 1.3 equiv.) and **4d** (67.0 mg, 0.2 mmol, 1.0 equiv.) in CH<sub>3</sub>CN (4 mL) was stirred at room temperature under blue light irradiation for 9 h. Column chromatography on silica gel (eluent: hexane to hexane/ethyl acetate = 4:1) afforded **5d** in 88% yield (79.0 mg) as a white solid. <sup>1</sup>H NMR (400 MHz, CDCl<sub>3</sub>, 50 °C) δ 7.26-7.13 (m, 8H), 6.98-6.95 (m, 4H), 6.32-6.29 (m, 2H), 4.45 (bs, 4H), 4.21 (q, *J* = 7.1 Hz, 2H), 1.21 (t, *J* = 7.1 Hz, 3H); <sup>13</sup>C NMR (75 MHz, CDCl<sub>3</sub>) δ 160.7, 140.8, 135.6, 134.71, 134.65, 131.4, 129.7, 128.6, 128.3, 127.5, 123.5, 62.6, 61.1, 14.1. IR (neat): 3030, 2968, 1738, 1719, 1486, 1480, 1456, 1436, 1377, 1365, 1329, 1229, 1217, 1196, 1089, 1058, 1017, 998, 821, 792, 742, 704, 694, 523, 496 cm<sup>-1</sup>; HRMS (ESI) calcd *m/z* for C<sub>25</sub>H<sub>24</sub>ClN<sub>4</sub>O<sub>2</sub><sup>+</sup> [M+H]<sup>+</sup>: 447.1582, found 447.1577.

### 2.5.5 Synthesis and characterization of ethyl 5-(4-bromophenyl)-1-(dibenzylamino)-1*H*-1,2,3-triazole-4-carboxylate (**5e**)

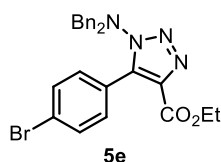

A mixture of Ru(bpy)<sub>3</sub>(PF<sub>6</sub>)<sub>2</sub> (1.7 mg, 0.002 mmol, 1 mol%), NaHCO<sub>3</sub> (50.4 mg, 0.6 mmol, 3.0 equiv.), **1a** (116.1 mg, 0.26 mmol, 1.3 equiv.) and **4e** (75.9 mg, 0.2 mmol, 1.0 equiv.) in CH<sub>3</sub>CN (4 mL) was stirred at room temperature under blue light irradiation for 13 h. Column chromatography on silica gel (eluent: hexane to hexane/ethyl acetate = 4:1) afforded **5e** in 90% yield (88.4 mg) as a white solid. <sup>1</sup>H NMR (400 MHz, CDCl<sub>3</sub>, 50 °C) δ 7.32-7.28 (m, 2H), 7.26-7.15 (m, 6H), 6.97-6.94 (m, 4H), 6.25-6.21 (m, 2H), 4.45 (bs, 4H), 4.21 (q, *J* = 7.1 Hz, 2H), 1.21 (t, *J* = 7.1 Hz, 3H); <sup>13</sup>C NMR (100 MHz, CDCl<sub>3</sub>, 50 °C) δ 160.8, 140.7, 134.9, 134.8, 131.8, 130.6, 129.8, 128.7, 128.4, 124.3, 124.0, 62.7, 61.0, 14.1. IR (neat): 3033, 2992, 1717, 1478, 1456, 1436, 1328, 1195, 1069, 1057, 1029, 1015, 996, 972, 846, 821, 791, 742, 726, 703, 693, 521, 493 cm<sup>-1</sup>; HRMS (ESI) calcd *m/z* for C<sub>25</sub>H<sub>24</sub>BrN<sub>4</sub>O<sub>2</sub><sup>+</sup> [M+H]<sup>+</sup>: 491.1077, found 491.1077.

### 2.5.6 Synthesis and characterization of ethyl 5-(4-cyanophenyl)-1-(dibenzylamino)-1*H*-1,2,3-triazole-4-carboxylate (**5f**)

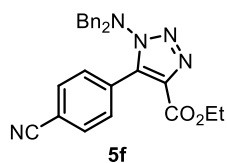

A mixture of Ru(bpy)<sub>3</sub>(PF<sub>6</sub>)<sub>2</sub> (1.7 mg, 0.002 mmol, 1 mol%), NaHCO<sub>3</sub> (50.4 mg, 0.6 mmol,

3.0 equiv.), **1a** (116.1 mg, 0.26 mmol, 1.3 equiv.) and **4f** (65.1 mg, 0.2 mmol, 1.0 equiv.) in CH<sub>3</sub>CN (4 mL) was stirred at room temperature under blue light irradiation for 9 h. Column chromatography on silica gel (eluent: hexane to hexane/ethyl acetate = 4:1) afforded **5f** in 91% yield (79.4 mg) as a white solid. <sup>1</sup>H NMR (400 MHz, CDCl<sub>3</sub>, 50 °C) δ 7.42-7.40 (m, 2H), 7.29-7.24 (m, 2H), 7.21-7.17 (m, 4H), 6.94-6.92 (m, 4H), 6.38-6.36 (m, 2H), 4.48 (bs, 4H), 4.21 (q, *J* = 7.1 Hz, 2H), 1.20 (t, *J* = 7.1 Hz, 3H); <sup>13</sup>C NMR (75 MHz, CDCl<sub>3</sub>) δ 160.5, 140.1, 134.8, 134.5, 130.78, 130.76, 129.80, 129.76, 128.7, 128.5, 118.3, 113.0, 62.8, 61.3, 14.0. IR (neat): 3030, 2968, 2225, 1738, 1717, 1496, 1444, 1378, 1365, 1337, 1330, 1230, 1216, 1197, 1058, 1032, 1015, 994, 849, 834, 760, 740, 700, 565, 546, 522 cm<sup>-1</sup>; HRMS (ESI) calcd *m/z* for C<sub>26</sub>H<sub>24</sub>N<sub>5</sub>O<sub>2</sub><sup>+</sup> [M+H]<sup>+</sup>: 438.1925, found 438.1926.

### 2.5.7 Synthesis and characterization of ethyl 5-([1,1'-biphenyl]-4-yl)-1-(dibenzylamino)-1H-1,2,3-triazole-4-carboxylate (**5g**)

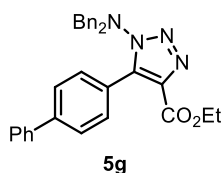

A mixture of Ru(bpy)<sub>3</sub>(PF<sub>6</sub>)<sub>2</sub> (1.7 mg, 0.002 mmol, 1 mol%), NaHCO<sub>3</sub> (50.4 mg, 0.6 mmol, 3.0 equiv.), **1a** (116.1 mg, 0.26 mmol, 1.3 equiv.) and **4g** (75.3 mg, 0.2 mmol, 1.0 equiv.) in CH<sub>3</sub>CN (4 mL) was stirred at room temperature under blue light irradiation for 12 h. Column chromatography on silica gel (eluent: hexane to hexane/ethyl acetate = 4:1) afforded **5g** in 81% yield (79.0 mg) as a white solid. <sup>1</sup>H NMR (400 MHz, CDCl<sub>3</sub>, 50 °C) δ 7.63-7.60 (m, 2H), 7.48-7.42 (m, 4H), 7.38-7.34 (m, 1H), 7.25-7.15 (m, 6H), 7.01-6.98 (m, 4H), 6.61-6.58 (m, 2H), 4.46 (bs, 4H), 4.23 (q, *J* = 7.1 Hz, 2H), 1.22 (t, *J* = 7.1 Hz, 3H); <sup>13</sup>C NMR (75 MHz, CDCl<sub>3</sub>) δ 161.0, 142.1, 141.5, 140.4, 134.9, 134.6, 130.6, 129.7, 128.9, 128.6, 128.2, 127.8, 127.2, 125.9, 124.0, 62.4, 61.1, 14.1. IR (neat): 3064, 3030, 2968, 2856, 1737, 1716, 1216, 1194, 1065, 1056, 856, 763, 749, 699, 600, 513 cm<sup>-1</sup>; HRMS (ESI) calcd *m/z* for C<sub>31</sub>H<sub>29</sub>N<sub>4</sub>O<sub>2</sub><sup>+</sup> [M+H]<sup>+</sup>: 489.2285, found 489.2283.

### 2.5.8 Synthesis and characterization of ethyl 1-(dibenzylamino)-5-(4-methoxyphenyl)-1H-1,2,3-triazole-4-carboxylate (**5h**)

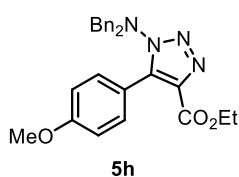

A mixture of Ru(bpy)<sub>3</sub>(PF<sub>6</sub>)<sub>2</sub> (1.7 mg, 0.002 mmol, 1 mol%), NaHCO<sub>3</sub> (50.4 mg, 0.6 mmol, 3.0 equiv.), **1a** (116.1 mg, 0.26 mmol, 1.3 equiv.) and **4h** (66.1 mg, 0.2 mmol, 1.0 equiv.) in CH<sub>3</sub>CN (4 mL) was stirred at room temperature under blue light irradiation for 10 h. Column chromatography on silica gel (eluent: hexane to hexane/ethyl acetate = 4:1) afforded **5h** in 86% yield (76.0 mg) as a white solid. <sup>1</sup>H NMR (400 MHz, CDCl<sub>3</sub>, 50 °C) δ 7.24-7.15 (m, 6H), 7.01-6.98 (m, 4H), 6.76-6.72 (m, 2H), 6.51-6.47 (m, 2H), 4.43 (bs, 4H), 4.22 (q, *J* = 7.1 Hz, 2H), 3.82 (s, 3H), 1.22 (t, *J* = 7.1 Hz, 3H); <sup>13</sup>C NMR (100 MHz, CDCl<sub>3</sub>) δ 161.0, 160.4, 141.5, 134.9, 134.4, 131.6, 129.6, 128.6, 128.2, 117.1, 112.8, 62.2, 60.9, 55.3, 14.1. IR (neat): 3064, 3033, 2966, 1714, 1611, 1501, 1437, 1300, 1253, 1190, 1065, 1030, 1019, 853, 791, 760, 750, 695, 622, 596, 502 cm<sup>-1</sup>; HRMS (ESI) calcd *m/z* for C<sub>26</sub>H<sub>27</sub>N<sub>4</sub>O<sub>3</sub><sup>+</sup> [M+H]<sup>+</sup>: 443.2078, found 443.2077.

### 2.5.9 Synthesis and characterization of ethyl 1-(dibenzylamino)-5-[4-(methoxycarbonyl)-phenyl]-1*H*-1,2,3-triazole-4-carboxylate (**5i**)

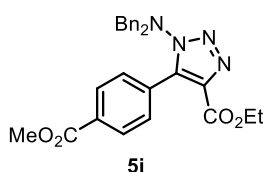

A mixture of Ru(bpy)<sub>3</sub>(PF<sub>6</sub>)<sub>2</sub> (1.7 mg, 0.002 mmol, 1 mol%), NaHCO<sub>3</sub> (50.4 mg, 0.6 mmol, 3.0 equiv.), **1a** (116.1 mg, 0.26 mmol, 1.3 equiv.) and **4i** (71.7 mg, 0.2 mmol, 1.0 equiv.) in CH<sub>3</sub>CN (4 mL) was stirred at room temperature under blue light irradiation for 8 h. Column chromatography on silica gel (eluent: hexane to hexane/ethyl acetate = 4:1) afforded **5i** in 92% yield (86.8 mg) as a white solid. <sup>1</sup>H NMR (400 MHz, CDCl<sub>3</sub>, 50 °C) δ 7.85-7.82 (m, 2H), 7.27-7.23 (m, 2H), 7.20-7.16 (m, 4H), 6.97-6.94 (m, 4H), 6.45-6.42 (m, 2H), 4.45 (bs, 4H), 4.20 (q, *J* = 7.1 Hz, 2H), 3.94 (s, 3H), 1.18 (t, *J* = 7.1 Hz, 3H); <sup>13</sup>C NMR (75 MHz, CDCl<sub>3</sub>) δ 166.6, 160.6, 140.8, 134.8, 134.6, 130.7, 130.1, 129.73, 129.69, 128.7, 128.34, 128.30, 62.6, 61.1, 52.3, 14.0. IR (neat): 2966, 1737, 1717, 1705, 1565, 1438, 1365, 1280, 1228, 1217, 1199, 1113, 1062, 1051, 855, 767, 753, 709, 696 cm<sup>-1</sup>; HRMS (ESI) calcd *m/z* for C<sub>27</sub>H<sub>27</sub>N<sub>4</sub>O<sub>4</sub><sup>+</sup> [M+H]<sup>+</sup>: 471.2027, found 471.2021.

### 2.5.10 Synthesis and characterization of ethyl 1-(dibenzylamino)-5-(4-(4,4,5,5-tetramethyl-1,3,2-dioxaborolan-2-yl)phenyl)-1*H*-1,2,3-triazole-4-carboxylate (**5j**)

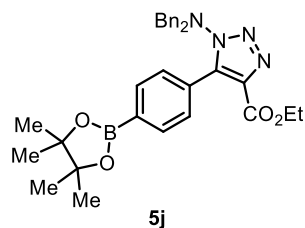

A mixture of Ru(bpy)<sub>3</sub>(PF<sub>6</sub>)<sub>2</sub> (1.7 mg, 0.002 mmol, 1 mol%), NaHCO<sub>3</sub> (50.4 mg, 0.6 mmol, 3.0 equiv.), **1a** (116.1 mg, 0.26 mmol, 1.3 equiv.) and **4j** (85.3 mg, 0.2 mmol, 1.0 equiv.) in CH<sub>3</sub>CN (4 mL) was stirred at room temperature under blue light irradiation for 8 h. Column chromatography on silica gel (eluent: hexane to hexane/ethyl acetate = 4:1) afforded **5j** in 62% yield (67.3 mg) as a white solid. <sup>1</sup>H NMR (400 MHz, CDCl<sub>3</sub>, 50 °C) δ 7.65-7.62 (m, 2H), 7.25-7.15 (m, 6H), 6.99-6.96 (m, 4H), 6.46-6.43 (m, 2H), 4.43 (bs, 4H), 4.20 (q, *J* = 7.1 Hz, 2H), 1.37 (s, 12H), 1.19 (t, *J* = 7.1 Hz, 3H); <sup>13</sup>C NMR (75 MHz, CDCl<sub>3</sub>) δ 160.8, 141.7, 134.8, 133.6, 129.8, 129.3, 128.7, 128.3, 127.8, 84.1, 62.5, 61.0, 25.0, 14.1. IR (neat): 2979, 2931, 1736, 1718, 1578, 1397, 1358, 1327, 1228, 1200, 1144, 1088, 1058, 1028, 856, 849, 751, 743, 696, 669, 654, 522 cm<sup>-1</sup>; HRMS (ESI) calcd *m/z* for C<sub>31</sub>H<sub>36</sub>BN<sub>4</sub>O<sub>4</sub><sup>+</sup> [M+H]<sup>+</sup>: 539.2824, found 539.2822.

### 2.5.11 Synthesis and characterization of ethyl 1-(dibenzylamino)-5-(3-fluorophenyl)-1*H*-1,2,3-triazole-4-carboxylate (**5k**)

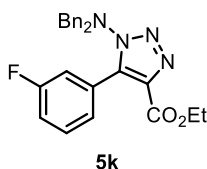

A mixture of Ru(bpy)<sub>3</sub>(PF<sub>6</sub>)<sub>2</sub> (1.7 mg, 0.002 mmol, 1 mol%), NaHCO<sub>3</sub> (50.4 mg, 0.6 mmol, 3.0 equiv.), **1a** (116.1 mg, 0.26 mmol, 1.3 equiv.) and **4k** (63.7 mg, 0.2 mmol, 1.0 equiv.) in CH<sub>3</sub>CN (4 mL) was stirred at room temperature under blue light irradiation for 9 h. Column chromatography on silica gel (eluent: hexane to hexane/ethyl acetate = 4:1) afforded **5k** in 84% yield (72.3 mg) as a white solid. <sup>1</sup>H NMR (400 MHz, CDCl<sub>3</sub>, 50 °C) δ 7.27-7.11 (m, 7H), 7.05-7.00 (m, 1H), 6.98-6.95 (m, 4H), 6.22-6.19 (m, 1H), 6.04-6.01 (m, 1H), 4.45 (bs, 4H), 4.21 (q, *J* = 7.1 Hz, 2H), 1.19 (t, *J* = 7.1 Hz, 3H); <sup>13</sup>C NMR (75 MHz, CDCl<sub>3</sub>) δ 161.6 (d, <sup>1</sup>*J*<sub>C-F</sub> = 244.3 Hz), 160.7, 140.5 (d, <sup>4</sup>*J*<sub>C-F</sub> = 2.5 Hz), 134.73, 134.70, 129.8, 128.8, 128.7, 128.4, 127.0 (d, <sup>3</sup>*J*<sub>C-F</sub> = 9.1 Hz), 125.8 (d, <sup>4</sup>*J*<sub>C-F</sub> = 3.3 Hz), 117.3 (d, <sup>2</sup>*J*<sub>C-F</sub> = 23.5 Hz), 116.3 (d, <sup>2</sup>*J*<sub>C-F</sub> = 20.9 Hz), 62.6,



61.1, 14.0;  $^{19}\text{F}$  NMR (282 MHz,  $\text{CDCl}_3$ )  $\delta$  -114.0. IR (neat): 3030, 2974, 2864, 1738, 1714, 1457, 1338, 1226, 1212, 1186, 1057, 1031, 866, 838, 780, 748, 696, 682, 524, 518  $\text{cm}^{-1}$ ; HRMS (ESI) calcd  $m/z$  for  $\text{C}_{25}\text{H}_{24}\text{N}_4\text{O}_2\text{F}^+$   $[\text{M}+\text{H}]^+$ : 431.1878, found 431.1875.

### 2.5.12 Synthesis and characterization of ethyl 5-(3-chlorophenyl)-1-(dibenzylamino)-1H-1,2,3-triazole-4-carboxylate (**5l**)

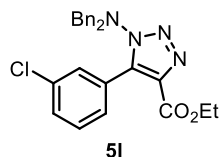

A mixture of  $\text{Ru}(\text{bpy})_3(\text{PF}_6)_2$  (1.7 mg, 0.002 mmol, 1 mol%),  $\text{NaHCO}_3$  (50.4 mg, 0.6 mmol, 3.0 equiv.), **1a** (116.1 mg, 0.26 mmol, 1.3 equiv.) and **4l** (67.0 mg, 0.2 mmol, 1.0 equiv.) in  $\text{CH}_3\text{CN}$  (4 mL) was stirred at room temperature under blue light irradiation for 10 h. Column chromatography on silica gel (eluent: hexane to hexane/ethyl acetate = 4:1) afforded **5l** in 86% yield (76.6 mg) as a white solid.  $^1\text{H}$  NMR (400 MHz,  $\text{CDCl}_3$ , 50  $^\circ\text{C}$ )  $\delta$  7.31-7.17 (m, 7H), 7.11-7.07 (m, 1H), 6.97-6.95 (m, 4H), 6.29-6.26 (m, 2H), 4.45 (bs, 4H), 4.22-4.17 (m, 2H), 1.20-1.16 (m, 3H);  $^{13}\text{C}$  NMR (100 MHz,  $\text{CDCl}_3$ )  $\delta$  160.3, 140.5, 134.7, 134.6, 133.1, 130.1, 129.8, 129.4, 128.7, 128.42, 128.38, 128.2, 126.7, 62.6, 61.1, 14.0. IR (neat): 3030, 2968, 1728, 1455, 1442, 1379, 1364, 1339, 1229, 1215, 1199, 1061, 889, 794, 769, 752, 720, 696, 682, 518  $\text{cm}^{-1}$ ; HRMS (ESI) calcd  $m/z$  for  $\text{C}_{25}\text{H}_{24}\text{ClN}_4\text{O}_2^+$   $[\text{M}+\text{H}]^+$ : 447.1582, found 447.1574.

### 2.5.13 Synthesis and characterization of ethyl 5-(3-acetylphenyl)-1-(dibenzylamino)-1H-1,2,3-triazole-4-carboxylate (**5m**)

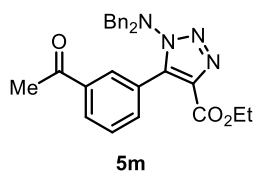

A mixture of  $\text{Ru}(\text{bpy})_3(\text{PF}_6)_2$  (1.7 mg, 0.002 mmol, 1 mol%),  $\text{NaHCO}_3$  (50.4 mg, 0.6 mmol, 3.0 equiv.), **1a** (116.1 mg, 0.26 mmol, 1.3 equiv.) and **4m** (68.5 mg, 0.2 mmol, 1.0 equiv.) in  $\text{CH}_3\text{CN}$  (4 mL) was stirred at room temperature under blue light irradiation for 10 h. Column chromatography on silica gel (eluent: hexane to hexane/ethyl acetate = 3:1) afforded **5m** in 93% yield (84.2 mg) as a white solid.  $^1\text{H}$  NMR (400 MHz,  $\text{CDCl}_3$ , 50  $^\circ\text{C}$ )  $\delta$  7.95-7.92 (m, 1H), 7.30-7.13 (m, 8H), 6.98-6.95 (m, 4H), 6.63-6.60 (m, 1H), 4.46 (bs, 4H), 4.21 (q,  $J$  = 7.1 Hz, 2H), 2.49 (s, 3H), 1.19 (t,  $J$  = 7.1 Hz, 3H);  $^{13}\text{C}$  NMR (75 MHz,  $\text{CDCl}_3$ )  $\delta$  197.1, 160.7, 140.7, 136.3, 134.70, 134.66, 134.6, 130.3, 129.7, 129.0, 128.6, 128.3, 127.6, 125.6, 62.5, 61.1, 26.7, 14.0.

IR (neat): 3033, 2979, 2244, 1721, 1684, 1454, 1264, 1239, 1229, 1190, 1057, 752, 731, 697, 667, 588  $\text{cm}^{-1}$ ; HRMS (ESI) calcd  $m/z$  for  $\text{C}_{27}\text{H}_{27}\text{N}_4\text{O}_3^+$   $[\text{M}+\text{H}]^+$ : 455.2078, found 455.2071.

#### 2.5.14 Synthesis and characterization of ethyl 1-(dibenzylamino)-5-(3-(trifluoromethyl)phenyl)-1H-1,2,3-triazole-4-carboxylate (**5n**)

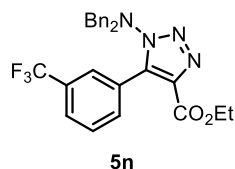

A mixture of  $\text{Ru}(\text{bpy})_3(\text{PF}_6)_2$  (1.7 mg, 0.002 mmol, 1 mol%),  $\text{NaHCO}_3$  (50.4 mg, 0.6 mmol, 3.0 equiv.), **1a** (116.1 mg, 0.26 mmol, 1.3 equiv.) and **4n** (73.7 mg, 0.2 mmol, 1.0 equiv.) in  $\text{CH}_3\text{CN}$  (4 mL) was stirred at room temperature under blue light irradiation for 10 h. Column chromatography on silica gel (eluent: hexane to hexane/ethyl acetate = 5:1) afforded **5n** in 92% yield (88.2 mg) as a white solid.  $^1\text{H}$  NMR (400 MHz,  $\text{CDCl}_3$ , 50  $^\circ\text{C}$ )  $\delta$  7.58 (d,  $J = 7.9$  Hz, 1H), 7.29-7.14 (m, 7H), 6.95-6.93 (m, 4H), 6.75 (s, 1H), 6.56 (d,  $J = 7.9$  Hz, 1H), 4.47 (bs, 4H), 4.20 (q,  $J = 7.1$  Hz, 2H), 1.16 (t,  $J = 7.1$  Hz, 3H);  $^{13}\text{C}$  NMR (100 MHz,  $\text{CDCl}_3$ )  $\delta$  160.6, 140.3, 134.8, 134.5, 133.6 (q,  $J = 1.4$  Hz), 129.77, 129.76 (q,  $J = 32.5$  Hz), 128.7, 128.5, 127.7, 127.1 (q,  $J = 3.8$  Hz), 126.0 (q,  $J = 3.7$  Hz), 125.9, 123.8 (q,  $J = 272.6$  Hz), 62.7, 61.2, 13.9. IR (neat): 3030, 2971, 1729, 1455, 1442, 1380, 1329, 1276, 1228, 1216, 1199, 1166, 1124, 1095, 1074, 1060, 1022, 903, 848, 752, 695, 651, 559, 525  $\text{cm}^{-1}$ ; HRMS (ESI) calcd  $m/z$  for  $\text{C}_{26}\text{H}_{24}\text{F}_3\text{N}_4\text{O}_2^+$   $[\text{M}+\text{H}]^+$ : 481.1846, found 481.1843.

#### 2.5.15 Synthesis and characterization of ethyl 5-(2-chlorophenyl)-1-(dibenzylamino)-1H-1,2,3-triazole-4-carboxylate (**5o**)

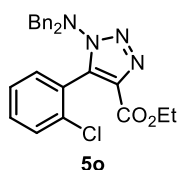

A mixture of  $\text{Ru}(\text{bpy})_3(\text{PF}_6)_2$  (1.7 mg, 0.002 mmol, 1 mol%),  $\text{NaHCO}_3$  (50.4 mg, 0.6 mmol, 3.0 equiv.), **1a** (116.1 mg, 0.26 mmol, 1.3 equiv.) and **4o** (67.0 mg, 0.2 mmol, 1.0 equiv.) in  $\text{CH}_3\text{CN}$  (4 mL) was stirred at room temperature under blue light irradiation for 9 h. Column chromatography on silica gel (eluent: hexane to hexane/ethyl acetate = 4:1) afforded **5o** in 86% yield (76.6 mg) as a colorless oil.  $^1\text{H}$  NMR (400 MHz,  $\text{CDCl}_3$ , 50  $^\circ\text{C}$ )  $\delta$  7.43-7.41 (m, 1H), 7.36 (td,  $J = 7.7, 1.6$  Hz, 1H), 7.27-7.18 (m, 6H), 7.06 (td,  $J = 7.5, 1.4$  Hz, 1H), 6.99-6.97 (m, 4H), 5.94 (dd,  $J = 7.7, 1.6$  Hz, 1H), 4.51-4.48 (m, 2H), 4.33-4.30 (m, 2H), 4.23-4.16 (m, 2H), 1.14

(t,  $J = 7.1$  Hz, 3H);  $^{13}\text{C}$  NMR (75 MHz,  $\text{CDCl}_3$ )  $\delta$  160.5, 138.6, 135.8, 135.4, 133.8, 132.0, 130.9, 129.5, 128.8, 128.7, 128.2, 126.1, 125.5, 61.5 (br), 61.0, 13.9. IR (neat): 3067, 3033, 2974, 2862, 1725, 1454, 1442, 1378, 1337, 1193, 1057, 1029, 750, 730, 697, 655  $\text{cm}^{-1}$ ; HRMS (ESI) calcd  $m/z$  for  $\text{C}_{25}\text{H}_{24}\text{ClN}_4\text{O}_2^+$   $[\text{M}+\text{H}]^+$ : 447.1582, found 447.1580.

### 2.5.16 Synthesis and characterization of ethyl 5-(2-bromophenyl)-1-(dibenzylamino)-1H-1,2,3-triazole-4-carboxylate (**5p**)

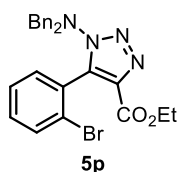

A mixture of  $\text{Ru}(\text{bpy})_3(\text{PF}_6)_2$  (1.7 mg, 0.002 mmol, 1 mol%),  $\text{NaHCO}_3$  (50.4 mg, 0.6 mmol, 3.0 equiv.), **1a** (116.1 mg, 0.26 mmol, 1.3 equiv.) and **4p** (75.9 mg, 0.2 mmol, 1.0 equiv.) in  $\text{CH}_3\text{CN}$  (4 mL) was stirred at room temperature under blue light irradiation for 10 h. Column chromatography on silica gel (eluent: hexane to hexane/ethyl acetate = 4:1) afforded **5p** in 85% yield (83.4 mg) as a colorless oil.  $^1\text{H}$  NMR (400 MHz,  $\text{CDCl}_3$ , 50  $^\circ\text{C}$ )  $\delta$  7.63-7.60 (m, 1H), 7.30-7.19 (m, 7H), 7.11-7.07 (m, 1H), 6.99-6.97 (m, 4H), 5.83-5.81 (m, 1H), 4.52-4.48 (m, 2H), 4.35-4.32 (m, 2H), 4.22-4.17 (m, 2H), 1.15-1.11 (m, 3H);  $^{13}\text{C}$  NMR (100 MHz,  $\text{CDCl}_3$ )  $\delta$  160.5, 140.1, 135.7, 135.4, 132.0, 131.0, 129.6, 128.7, 128.2, 127.8, 126.7, 123.5, 61.5 (br), 61.0, 13.9. IR (neat): 3033, 2979, 2859, 1724, 1470, 1454, 1436, 1336, 1193, 1058, 1029, 750, 729, 697, 646  $\text{cm}^{-1}$ ; HRMS (ESI) calcd  $m/z$  for  $\text{C}_{25}\text{H}_{24}\text{BrN}_4\text{O}_2^+$   $[\text{M}+\text{H}]^+$ : 491.1077, found 491.1073.

### 2.5.17 Synthesis and characterization of ethyl 5-(3,5-bis(trifluoromethyl)phenyl)-1-(dibenzylamino)-1H-1,2,3-triazole-4-carboxylate (**5q**)

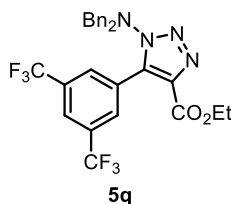

A mixture of  $\text{Ru}(\text{bpy})_3(\text{PF}_6)_2$  (1.7 mg, 0.002 mmol, 1 mol%),  $\text{NaHCO}_3$  (50.4 mg, 0.6 mmol, 3.0 equiv.), **1a** (116.1 mg, 0.26 mmol, 1.3 equiv.) and **4q** (87.3 mg, 0.2 mmol, 1.0 equiv.) in  $\text{CH}_3\text{CN}$  (4 mL) was stirred at room temperature under blue light irradiation for 9 h. Column chromatography on silica gel (eluent: hexane to hexane/ethyl acetate = 5:1) afforded **5q** in 69% yield (75.2 mg) as a white solid.  $^1\text{H}$  NMR (400 MHz,  $\text{CDCl}_3$ , 60  $^\circ\text{C}$ )  $\delta$  7.79 (s, 1H), 7.25-7.21 (m, 2H), 7.17-7.13 (m, 4H), 6.93-6.89 (m, 6H), 4.51 (bs, 4H), 4.21 (q,  $J = 7.1$  Hz, 2H), 1.17 (t,

$J = 7.1$  Hz, 3H);  $^{13}\text{C}$  NMR (75 MHz,  $\text{CDCl}_3$ )  $\delta$  160.4, 138.9, 135.0, 134.1, 130.7 (q,  $^2J_{\text{C-F}} = 33.6$  Hz), 130.6 (q,  $^3J_{\text{C-F}} = 3.9$  Hz), 129.9, 128.9, 128.8, 127.0, 123.04 (m), 123.01 (q,  $^1J_{\text{C-F}} = 271.2$  Hz), 63.2, 61.5, 13.9;  $^{19}\text{F}$  NMR (282 MHz,  $\text{CDCl}_3$ )  $\delta$  -62.5. IR (neat): 3004, 2968, 2945, 1739, 1727, 1455, 1435, 1367, 1277, 1228, 1217, 1203, 1178, 1130, 1109, 1063, 1046, 1029, 902, 755, 699, 680  $\text{cm}^{-1}$ ; HRMS (ESI) calcd  $m/z$  for  $\text{C}_{27}\text{H}_{23}\text{F}_6\text{N}_4\text{O}_2^+$   $[\text{M}+\text{H}]^+$ : 549.1720, found 549.1715.

### 2.5.18 Synthesis and characterization of ethyl 1-(dibenzylamino)-5-(1-methyl-1H-pyrazol-4-yl)-1H-1,2,3-triazole-4-carboxylate (**5r**)

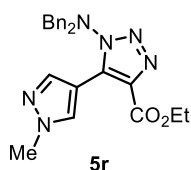

A mixture of  $\text{Ru}(\text{bpy})_3(\text{PF}_6)_2$  (1.7 mg, 0.002 mmol, 1 mol%),  $\text{NaHCO}_3$  (50.4 mg, 0.6 mmol, 3.0 equiv.), **1a** (116.1 mg, 0.26 mmol, 1.3 equiv.) and **4r** (60.9 mg, 0.2 mmol, 1.0 equiv.) in  $\text{CH}_3\text{CN}$  (4 mL) was stirred at room temperature under blue light irradiation for 9 h. Column chromatography on silica gel (eluent: hexane to hexane/ethyl acetate = 1:1) afforded **5r** in 77% yield (63.8 mg) as a white solid.  $^1\text{H}$  NMR (400 MHz,  $\text{CDCl}_3$ , 50  $^\circ\text{C}$ )  $\delta$  7.74 (s, 1H), 7.65 (s, 1H), 7.20-7.14 (m, 6H), 7.10-7.06 (m, 4H), 4.50 (bs, 4H), 4.34 (q,  $J = 7.1$  Hz, 2H), 3.81 (s, 3H), 1.37 (t,  $J = 7.1$  Hz, 3H);  $^{13}\text{C}$  NMR (75 MHz,  $\text{CDCl}_3$ )  $\delta$  161.6, 139.7, 134.6, 134.4, 132.55, 132.53, 129.8, 128.5, 128.2, 105.4, 62.4, 61.2, 39.0, 14.3. IR (neat): 2974, 2856, 1738, 1710, 1452, 1445, 1365, 1227, 1200, 1176, 1162, 1046, 981, 757, 712, 698, 520  $\text{cm}^{-1}$ ; HRMS (ESI) calcd  $m/z$  for  $\text{C}_{23}\text{H}_{25}\text{N}_6\text{O}_2^+$   $[\text{M}+\text{H}]^+$ : 417.2034, found 417.2032.

### 2.5.19 Synthesis and characterization of ethyl 1-(dibenzylamino)-5-(perfluorophenyl)-1H-1,2,3-triazole-4-carboxylate (**5s**)

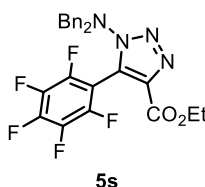

A mixture of  $\text{Ru}(\text{bpy})_3(\text{PF}_6)_2$  (1.7 mg, 0.002 mmol, 1 mol%),  $\text{NaHCO}_3$  (50.4 mg, 0.6 mmol, 3.0 equiv.), **1a** (116.1 mg, 0.26 mmol, 1.3 equiv.) and **4s** (78.1 mg, 0.2 mmol, 1.0 equiv.) in  $\text{CH}_3\text{CN}$  (4 mL) was stirred at room temperature under blue light irradiation for 9 h. Column chromatography on silica gel (eluent: hexane to hexane/ethyl acetate = 10:1) afforded **5s** in 52% yield (52.7 mg) as a white solid.  $^1\text{H}$  NMR (300 MHz,  $\text{CDCl}_3$ )  $\delta$  7.32-7.20 (m, 6H), 7.05-7.02

(m, 4H), 4.41 (bs, 4H), 4.31 (q,  $J = 7.1$  Hz, 2H), 1.29 (t,  $J = 7.1$  Hz, 3H);  $^{13}\text{C}$  NMR (100 MHz,  $\text{CDCl}_3$ )  $\delta$  159.9, 145.8-143.1 [m, ArC(2,6)F], 142.5 [dtt,  $J = 257.7, 13.0, 4.9$  Hz, ArC(4)F], 138.8-136.0 [m, ArC(3,5)F], 136.8, 134.8, 129.2, 128.8, 128.5, 127.3 (m), 102.1 [td,  $J = 17.3, 4.1$  Hz, ArC(1)], 61.70, 61.68, 14.1;  $^{19}\text{F}$  NMR (282 MHz,  $\text{CDCl}_3$ )  $\delta$  -134.9 [m, Ar(2,6)F], -150.1 [tt,  $J = 20.9, 3.4$  Hz, Ar(4)F], -162.0 [m, Ar(3,5)F]. IR (neat): 3001, 2971, 1737, 1720, 1517, 1508, 1496, 1455, 1377, 1365, 1338, 1310, 1235, 1217, 1186, 1111, 1055, 1029, 985, 854, 821, 755, 709, 700, 684, 521  $\text{cm}^{-1}$ ; HRMS (ESI) calcd  $m/z$  for  $\text{C}_{25}\text{H}_{20}\text{N}_4\text{O}_2\text{F}_5^+$  [M+H] $^+$ : 503.1501, found 503.1504.

### 2.5.20 Synthesis and characterization of diethyl 5,5'-(1,3-phenylene)bis[1-(dibenzylamino)-1H-1,2,3-triazole-4-carboxylate] (5t)

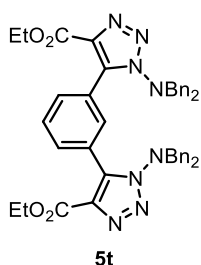

A mixture of  $\text{Ru}(\text{bpy})_3(\text{PF}_6)_2$  (1.7 mg, 0.002 mmol, 2 mol%),  $\text{NaHCO}_3$  (50.4 mg, 0.6 mmol, 6.0 equiv.), **1a** (102.7 mg, 0.23 mmol, 2.3 equiv.) and **4t** (52.3 mg, 0.1 mmol, 1.0 equiv.) in  $\text{CH}_3\text{CN}$  (4 mL) was stirred at room temperature under blue light irradiation for 19 h. Column chromatography on silica gel (eluent: hexane to hexane/ethyl acetate = 3:1) afforded **5t** in 66% yield (49.2 mg) as a white solid.  $^1\text{H}$  NMR (400 MHz,  $\text{CDCl}_3$ , 50  $^\circ\text{C}$ )  $\delta$  7.14-7.09 (m, 4H), 7.06-6.99 (m, 9H), 6.87-6.84 (m, 8H), 6.39 (dd,  $J = 7.8, 1.7$  Hz, 2H), 5.88-5.87 (m, 1H), 4.34-4.27 (m, 12H), 1.28 (t,  $J = 7.1$  Hz, 6H);  $^{13}\text{C}$  NMR (75 MHz,  $\text{CDCl}_3$ )  $\delta$  160.7, 140.8, 134.9, 134.8, 131.4, 130.7, 129.7, 128.5, 128.2, 126.7, 124.8, 62.2, 61.1, 14.2. IR (neat): 3035, 2968, 1727, 1455, 1439, 1378, 1364, 1335, 1229, 1216, 1187, 1062, 756, 732, 697, 516  $\text{cm}^{-1}$ ; HRMS (ESI) calcd  $m/z$  for  $\text{C}_{44}\text{H}_{43}\text{N}_8\text{O}_4^+$  [M+H] $^+$ : 747.3402, found 747.3387.

### 2.5.21 Synthesis and characterization of N,N-dibenzyl-5-(4-chlorophenyl)-4-(trifluoromethyl)-1H-1,2,3-triazol-1-amine (5u)

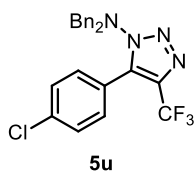

A mixture of  $\text{Ru}(\text{bpy})_3(\text{PF}_6)_2$  (1.7 mg, 0.002 mmol, 1 mol%),  $\text{NaHCO}_3$  (50.4 mg, 0.6 mmol,

3.0 equiv.), **1b** (115.0 mg, 0.26 mmol, 1.3 equiv.) and **4d** (67.0 mg, 0.2 mmol, 1.0 equiv.) in CH<sub>3</sub>CN (4 mL) was stirred at room temperature under blue light irradiation for 11 h. Column chromatography on silica gel (eluent: hexane to hexane/ethyl acetate = 10:1) afforded **5u** in 90% yield (79.4 mg) as a white solid. <sup>1</sup>H NMR (300 MHz, CDCl<sub>3</sub>) δ 7.31-7.13 (m, 8H), 6.98-6.94 (m, 4H), 6.19-6.15 (m, 2H), 4.46 (bs, 4H); <sup>13</sup>C NMR (100 MHz, CDCl<sub>3</sub>) δ 137.2 (q, *J* = 2.4 Hz), 136.2, 134.7, 134.2 (q, *J* = 38.4 Hz), 131.1, 129.8, 128.8, 128.5, 128.1, 122.3, 120.6 (q, *J* = 268.5 Hz), 62.8; <sup>19</sup>F NMR (282 MHz, CDCl<sub>3</sub>) δ -59.8. IR (neat): 3030, 2968, 2864, 1739, 1613, 1581, 1492, 1445, 1352, 1184, 1159, 1128, 1092, 1045, 985, 908, 831, 749, 737, 697, 511, 496 cm<sup>-1</sup>; HRMS (ESI) calcd *m/z* for C<sub>23</sub>H<sub>19</sub>ClF<sub>3</sub>N<sub>4</sub><sup>+</sup> [M+H]<sup>+</sup>: 443.1245, found 443.1242.

### 2.5.22 Synthesis and characterization of 1-{3-[1-(dibenzylamino)-4-(trifluoromethyl)-1*H*-1,2,3-triazol-5-yl]phenyl}ethan-1-one (**5v**)

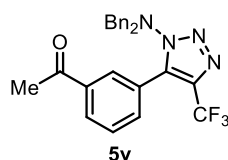

A mixture of Ru(bpy)<sub>3</sub>(PF<sub>6</sub>)<sub>2</sub> (1.7 mg, 0.002 mmol, 1 mol%), NaHCO<sub>3</sub> (50.4 mg, 0.6 mmol, 3.0 equiv.), **1b** (115.0 mg, 0.26 mmol, 1.3 equiv.) and **4m** (68.5 mg, 0.2 mmol, 1.0 equiv.) in CH<sub>3</sub>CN (4 mL) was stirred at room temperature under blue light irradiation for 15 h. Column chromatography on silica gel (eluent: hexane to hexane/ethyl acetate = 5:1) afforded **5v** in 72% yield (64.9 mg) as a white solid. <sup>1</sup>H NMR (400 MHz, CDCl<sub>3</sub>, 50 °C) δ 7.96-7.93 (m, 1H), 7.31-7.11 (m, 8H), 6.96-6.94 (m, 4H), 6.54-6.51 (m, 1H), 4.47 (bs, 4H), 2.48 (s, 3H); <sup>13</sup>C NMR (75 MHz, CDCl<sub>3</sub>) δ 196.9, 137.2 (q, *J* = 2.2 Hz), 136.8, 134.5, 134.2, 134.1 (q, *J* = 38.3 Hz), 129.73, 129.67, 129.5, 128.7, 128.5, 128.2, 124.4, 120.7 (q, *J* = 268.4 Hz), 62.7, 26.7; <sup>19</sup>F NMR (282 MHz, CDCl<sub>3</sub>) δ -59.6. IR (neat): 3033, 2971, 1739, 1684, 1446, 1432, 1381, 1360, 1230, 1216, 1189, 1158, 1122, 1049, 1003, 798, 748, 739, 697, 687, 589, 524 cm<sup>-1</sup>; HRMS (ESI) calcd *m/z* for C<sub>25</sub>H<sub>22</sub>F<sub>3</sub>N<sub>4</sub>O<sup>+</sup> [M+H]<sup>+</sup>: 451.1740, found 451.1742.

### 2.5.23 Synthesis and characterization of ethyl 1-morpholino-5-phenyl-1*H*-1,2,3-triazole-4-carboxylate (**5w**)

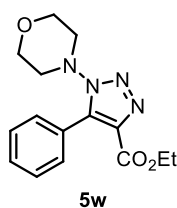

A mixture of Ru(bpy)<sub>3</sub>(PF<sub>6</sub>)<sub>2</sub> (1.7 mg, 0.002 mmol, 1 mol%), NaHCO<sub>3</sub> (50.4 mg, 0.6 mmol,

3.0 equiv.), **1a** (116.1 mg, 0.26 mmol, 1.3 equiv.) and **4u** (38.1 mg, 0.2 mmol, 1.0 equiv.) in CH<sub>3</sub>CN (4 mL) was stirred at room temperature under blue light irradiation for 13 h. Column chromatography on silica gel (eluent: hexane to hexane/ethyl acetate = 3:1) afforded **5w** in 56% yield (34.1 mg) as a white solid. <sup>1</sup>H NMR (300 MHz, CDCl<sub>3</sub>) δ 7.52-7.46 (m, 5H), 4.35 (q, *J* = 7.1 Hz, 2H), 3.79-3.76 (m, 4H), 3.38-3.35 (m, 4H), 1.31 (t, *J* = 7.1 Hz, 3H); <sup>13</sup>C NMR (75 MHz, CDCl<sub>3</sub>) δ 161.1, 138.9, 135.1, 130.3, 130.1, 128.1, 125.1, 66.6, 61.2, 55.8, 14.2. IR (neat): 3060, 3004, 2969, 2925, 2855, 1737, 1726, 1715, 1577, 1571, 1491, 1453, 1389, 1372, 1348, 1340, 1287, 1274, 1260, 1215, 1205, 1107, 1063, 1033, 1022, 1005, 912, 850, 791, 764, 755, 699, 689, 559, 510, 478 cm<sup>-1</sup>; HRMS (ESI) calcd *m/z* for C<sub>15</sub>H<sub>19</sub>N<sub>4</sub>O<sub>3</sub><sup>+</sup> [M+H]<sup>+</sup>: 303.1452, found 303.1454.

#### 2.5.24 Synthesis and characterization of ethyl 5-(4-bromophenyl)-1-morpholino-1*H*-1,2,3-triazole-4-carboxylate (**5x**)

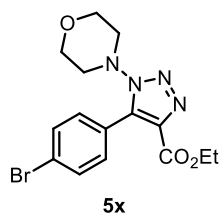

A mixture of Ru(bpy)<sub>3</sub>(PF<sub>6</sub>)<sub>2</sub> (1.7 mg, 0.002 mmol, 1 mol%), NaHCO<sub>3</sub> (50.4 mg, 0.6 mmol, 3.0 equiv.), **1a** (116.1 mg, 0.26 mmol, 1.3 equiv.) and **4v** (53.8 mg, 0.2 mmol, 1.0 equiv.) in CH<sub>3</sub>CN (4 mL) was stirred at room temperature under blue light irradiation for 14 h. Column chromatography on silica gel (eluent: hexane to hexane/ethyl acetate = 3:1) afforded **5x** in 62% yield (47.6 mg) as a white solid. <sup>1</sup>H NMR (300 MHz, CDCl<sub>3</sub>) δ 7.66-7.62 (m, 2H), 7.40-7.36 (m, 2H), 4.36 (q, *J* = 7.1 Hz, 2H), 3.80-3.77 (m, 4H), 3.37-3.34 (m, 4H), 1.34 (t, *J* = 7.1 Hz, 3H); <sup>13</sup>C NMR (75 MHz, CDCl<sub>3</sub>) δ 161.0, 137.9, 135.1, 131.9, 131.5, 124.8, 123.9, 66.5, 61.4, 55.9, 14.3. IR (neat): 2966, 2856, 1725, 1712, 1610, 1484, 1454, 1341, 1202, 1105, 1064, 1035, 1023, 998, 914, 851, 822, 788, 560, 487 cm<sup>-1</sup>; HRMS (ESI) calcd *m/z* for C<sub>15</sub>H<sub>18</sub>BrN<sub>4</sub>O<sub>3</sub><sup>+</sup> [M+H]<sup>+</sup>: 381.0557, found 381.0555.

### 2.5.25 Synthesis and characterization of ethyl 5-(2-bromophenyl)-1-morpholino-1*H*-1,2,3-triazole-4-carboxylate (**5y**)

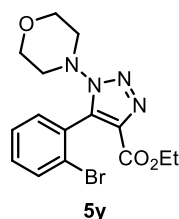

A mixture of Ru(bpy)<sub>3</sub>(PF<sub>6</sub>)<sub>2</sub> (1.7 mg, 0.002 mmol, 1 mol%), NaHCO<sub>3</sub> (50.4 mg, 0.6 mmol, 3.0 equiv.), **1a** (116.1 mg, 0.26 mmol, 1.3 equiv.) and **4w** (53.8 mg, 0.2 mmol, 1.0 equiv.) in CH<sub>3</sub>CN (4 mL) was stirred at room temperature under blue light irradiation for 14 h. Column chromatography on silica gel (eluent: hexane to hexane/ethyl acetate = 3:1) afforded **5y** in 61% yield (46.5 mg) as a white solid. <sup>1</sup>H NMR (300 MHz, CDCl<sub>3</sub>) δ 7.74-7.71 (m, 1H), 7.47-7.36 (m, 2H), 7.23-7.20 (m, 1H), 4.36-4.20 (m, 2H), 3.76-3.66 (m, 4H), 3.48-3.41 (m, 2H), 3.36-3.29 (m, 2H), 1.21 (t, *J* = 7.1 Hz, 3H); <sup>13</sup>C NMR (75 MHz, CDCl<sub>3</sub>) δ 160.5, 138.5, 136.0, 132.9, 131.41, 131.36, 128.1, 127.3, 123.8, 66.6, 61.2, 55.8, 14.1. IR (neat): 2968, 2928, 1730, 1658, 1563, 1454, 1375, 1200, 1104, 1071, 1031, 1018, 849, 766, 558 cm<sup>-1</sup>; HRMS (ESI) calcd *m/z* for C<sub>15</sub>H<sub>18</sub>BrN<sub>4</sub>O<sub>3</sub><sup>+</sup> [M+H]<sup>+</sup>: 381.0557, found 381.0556.

### 2.5.26 Synthesis and characterization of ethyl 1-morpholino-5-[3-(trifluoromethyl)phenyl]-1*H*-1,2,3-triazole-4-carboxylate (**5z**)

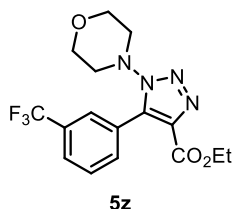

A mixture of Ru(bpy)<sub>3</sub>(PF<sub>6</sub>)<sub>2</sub> (1.7 mg, 0.002 mmol, 1 mol%), NaHCO<sub>3</sub> (50.4 mg, 0.6 mmol, 3.0 equiv.), **1a** (116.1 mg, 0.26 mmol, 1.3 equiv.) and **4x** (51.6 mg, 0.2 mmol, 1.0 equiv.) in CH<sub>3</sub>CN (4 mL) was stirred at room temperature under blue light irradiation for 16 h. Column chromatography on silica gel (eluent: hexane to hexane/ethyl acetate = 3:1) afforded **5z** in 71% yield (52.7 mg) as a white solid. <sup>1</sup>H NMR (300 MHz, CDCl<sub>3</sub>) δ 7.80-7.73 (m, 3H), 7.68-7.62 (m, 1H), 4.36 (q, *J* = 7.1 Hz, 2H), 3.80-3.77 (m, 4H), 3.40-3.37 (m, 4H), 1.32 (t, *J* = 7.1 Hz, 3H); <sup>13</sup>C NMR (75 MHz, CDCl<sub>3</sub>) δ 160.8, 137.3, 135.3, 133.9 (q, *J* = 1.5 Hz), 130.7 (q, *J* = 32.8 Hz), 128.7, 127.4 (q, *J* = 4.0 Hz), 126.8 (q, *J* = 3.7 Hz), 125.9, 123.8 (q, *J* = 272.5 Hz), 66.5, 61.5, 55.9, 14.1; <sup>19</sup>F NMR (282 MHz, CDCl<sub>3</sub>) δ -62.8. IR (neat): 2971, 2901, 2867, 1732, 1458, 1328, 1271, 1199, 1179, 1162, 1108, 1071, 1037, 1025, 912, 850, 806, 791, 699, 556 cm<sup>-1</sup>.



<sup>1</sup>; HRMS (ESI) calcd  $m/z$  for C<sub>16</sub>H<sub>18</sub>F<sub>3</sub>N<sub>4</sub>O<sub>3</sub><sup>+</sup> [M+H]<sup>+</sup>: 371.1326, found 371.1328.

### 2.5.27 Synthesis and characterization of ethyl 5-(3-acetylphenyl)-1-morpholino-1*H*-1,2,3-triazole-4-carboxylate (**5aa**)

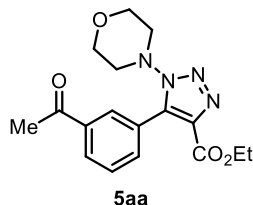

A mixture of Ru(bpy)<sub>3</sub>(PF<sub>6</sub>)<sub>2</sub> (1.7 mg, 0.002 mmol, 1 mol%), NaHCO<sub>3</sub> (50.4 mg, 0.6 mmol, 3.0 equiv.), **1a** (116.1 mg, 0.26 mmol, 1.3 equiv.) and **4y** (46.5 mg, 0.2 mmol, 1.0 equiv.) in CH<sub>3</sub>CN (4 mL) was stirred at room temperature under blue light irradiation for 13 h. Column chromatography on silica gel (eluent: hexane to hexane/ethyl acetate = 2:1) afforded **5aa** in 65% yield (44.6 mg) as a white solid. <sup>1</sup>H NMR (300 MHz, CDCl<sub>3</sub>) δ 8.15-8.08 (m, 2H), 7.75-7.71 (m, 1H), 7.65-7.59 (m, 1H), 4.36 (q,  $J = 7.1$  Hz, 2H), 3.80-3.77 (m, 4H), 3.41-3.38 (m, 4H), 2.66 (s, 3H), 1.32 (t,  $J = 7.1$  Hz, 3H); <sup>13</sup>C NMR (75 MHz, CDCl<sub>3</sub>) δ 197.1, 161.0, 137.9, 137.0, 135.2, 134.8, 130.4, 129.9, 128.5, 125.6, 66.6, 61.4, 55.9, 26.7, 14.3. IR (neat): 2979, 2862, 1722, 1685, 1560, 1467, 1278, 1258, 1239, 1198, 1106, 1065, 1037, 1014, 794, 692, 588, 561 cm<sup>-1</sup>; HRMS (ESI) calcd  $m/z$  for C<sub>17</sub>H<sub>21</sub>N<sub>4</sub>O<sub>4</sub><sup>+</sup> [M+H]<sup>+</sup>: 345.1557, found 345.1558.

### 2.5.28 Synthesis and characterization of ethyl 5-(4-methoxyphenyl)-1-morpholino-1*H*-1,2,3-triazole-4-carboxylate (**5ab**)

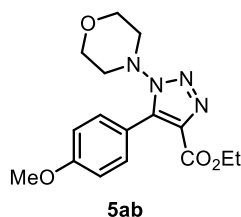

A mixture of Ru(bpy)<sub>3</sub>(PF<sub>6</sub>)<sub>2</sub> (1.7 mg, 0.002 mmol, 1 mol%), NaHCO<sub>3</sub> (50.4 mg, 0.6 mmol, 3.0 equiv.), **1a** (116.1 mg, 0.26 mmol, 1.3 equiv.) and **4z** (44.1 mg, 0.2 mmol, 1.0 equiv.) in CH<sub>3</sub>CN (4 mL) was stirred at room temperature under blue light irradiation for 12 h. Column chromatography on silica gel (eluent: hexane to hexane/ethyl acetate = 3:1) afforded **5ab** in 41% yield (27.4 mg) as a white solid. <sup>1</sup>H NMR (300 MHz, CDCl<sub>3</sub>) δ 7.48-7.45 (m, 2H), 7.02-6.99 (m, 2H), 4.37 (q,  $J = 7.1$  Hz, 2H), 3.88 (s, 3H), 3.81-3.78 (m, 4H), 3.38-3.34 (m, 4H), 1.34 (t,  $J = 7.1$  Hz, 3H); <sup>13</sup>C NMR (75 MHz, CDCl<sub>3</sub>) δ 161.3, 161.0, 138.8, 134.7, 131.9, 116.8, 113.6, 66.6, 61.2, 55.7, 55.4, 14.3. IR (neat): 2974, 2923, 2860, 2840, 1718, 1612, 1580, 1567, 1505,

1464, 1455, 1446, 1388, 1370, 1342, 1297, 1274, 1253, 1196, 1175, 1122, 1107, 1091, 1065, 1033, 1018, 992, 911, 851, 832, 814, 794, 779, 627, 616, 562, 530, 507  $\text{cm}^{-1}$ ; HRMS (ESI) calcd  $m/z$  for  $\text{C}_{16}\text{H}_{21}\text{N}_4\text{O}_4^+$   $[\text{M}+\text{H}]^+$ : 333.1557, found 333.1557.

### 2.5.29 Synthesis and characterization of ethyl 5-([1,1'-biphenyl]-4-yl)-1-morpholino-1*H*-1,2,3-triazole-4-carboxylate (**5ac**)

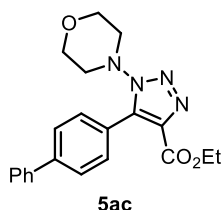

A mixture of  $\text{Ru}(\text{bpy})_3(\text{PF}_6)_2$  (1.7 mg, 0.002 mmol, 1 mol%),  $\text{NaHCO}_3$  (50.4 mg, 0.6 mmol, 3.0 equiv.), **1a** (116.1 mg, 0.26 mmol, 1.3 equiv.) and **4aa** (53.3 mg, 0.2 mmol, 1.0 equiv.) in  $\text{CH}_3\text{CN}$  (4 mL) was stirred at room temperature under blue light irradiation for 12 h. Column chromatography on silica gel (eluent: hexane to hexane/ethyl acetate = 3:1) afforded **5ac** in 56% yield (42.5 mg) as a white solid.  $^1\text{H}$  NMR (300 MHz,  $\text{CDCl}_3$ )  $\delta$  7.74-7.70 (m, 2H), 7.68-6.64 (m, 2H), 7.60-7.56 (m, 2H), 7.51-7.45 (m, 2H), 7.43-7.37 (m, 1H), 4.38 (q,  $J = 7.1$  Hz, 2H), 3.82-3.79 (m, 4H), 3.41-3.38 (m, 4H), 1.34 (t,  $J = 7.1$  Hz, 3H);  $^{13}\text{C}$  NMR (75 MHz,  $\text{CDCl}_3$ )  $\delta$  161.2, 142.9, 140.2, 138.7, 135.1, 130.8, 129.0, 128.0, 127.3, 126.8, 123.7, 66.6, 61.3, 55.9, 14.3. IR (film): 2970, 2927, 2901, 2860, 2361, 1725, 1486, 1456, 1444, 1374, 1344, 1295, 1267, 1227, 1202, 1111, 1065, 1036, 1018, 912, 853, 793, 768, 732, 698, 563  $\text{cm}^{-1}$ ; HRMS (ESI) calcd  $m/z$  for  $\text{C}_{21}\text{H}_{23}\text{N}_4\text{O}_3^+$   $[\text{M}+\text{H}]^+$ : 379.1765, found 379.1770.

### 2.5.30 Synthesis and characterization of ethyl 5-(4-fluorophenyl)-1-morpholino-1*H*-1,2,3-triazole-4-carboxylate (**5ad**)

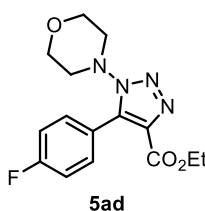

A mixture of  $\text{Ru}(\text{bpy})_3(\text{PF}_6)_2$  (1.7 mg, 0.002 mmol, 1 mol%),  $\text{NaHCO}_3$  (50.4 mg, 0.6 mmol, 3.0 equiv.), **1a** (116.1 mg, 0.26 mmol, 1.3 equiv.) and **4ab** (41.6 mg, 0.2 mmol, 1.0 equiv.) in  $\text{CH}_3\text{CN}$  (4 mL) was stirred at room temperature under blue light irradiation for 13 h. Column chromatography on silica gel (eluent: hexane to hexane/ethyl acetate = 3:1) afforded **5ad** in 59% yield (37.6 mg) as a white solid.  $^1\text{H}$  NMR (300 MHz,  $\text{CDCl}_3$ )  $\delta$  7.53-7.48 (m, 2H), 7.22-7.17 (m, 2H), 4.36 (q,  $J = 7.1$  Hz, 2H), 3.80-3.77 (m, 4H), 3.38-3.35 (m, 4H), 1.33 (t,  $J = 7.1$  Hz,

3H);  $^{13}\text{C}$  NMR (75 MHz,  $\text{CDCl}_3$ )  $\delta$  163.7 (d,  $^1J_{\text{C-F}} = 251.1$  Hz), 161.1, 138.0, 135.0, 132.5 (d,  $^3J_{\text{C-F}} = 8.6$  Hz), 121.0 (d,  $^4J_{\text{C-F}} = 3.6$  Hz), 115.5 (d,  $^2J_{\text{C-F}} = 22.0$  Hz), 66.6, 61.3, 55.8, 14.3;  $^{19}\text{F}$  NMR (282 MHz,  $\text{CDCl}_3$ )  $\delta$  -109.9. IR (neat): 2963, 2934, 2917, 2898, 2860, 1721, 1712, 1615, 1597, 1572, 1501, 1464, 1443, 1394, 1386, 1373, 1340, 1289, 1262, 1254, 1234, 1223, 1199, 1160, 1130, 1111, 1065, 1032, 1022, 1003, 925, 910, 868, 852, 835, 813, 789, 730, 720, 691, 626, 615, 560, 517, 494, 457, 411  $\text{cm}^{-1}$ ; HRMS (ESI) calcd  $m/z$  for  $\text{C}_{15}\text{H}_{18}\text{FN}_4\text{O}_3^+$   $[\text{M}+\text{H}]^+$ : 321.1357, found 321.1359.

### 2.5.31 Synthesis and characterization of ethyl 1-morpholino-5-(*p*-tolyl)-1*H*-1,2,3-triazole-4-carboxylate (**5ae**)

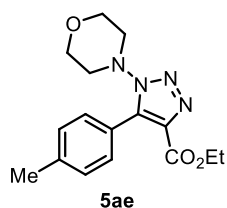

A mixture of  $\text{Ru}(\text{bpy})_3(\text{PF}_6)_2$  (1.7 mg, 0.002 mmol, 1 mol%),  $\text{NaHCO}_3$  (50.4 mg, 0.6 mmol, 3.0 equiv.), **1a** (116.1 mg, 0.26 mmol, 1.3 equiv.) and **4ac** (40.9 mg, 0.2 mmol, 1.0 equiv.) in  $\text{CH}_3\text{CN}$  (4 mL) was stirred at room temperature under blue light irradiation for 13 h. Column chromatography on silica gel (eluent: hexane to hexane/ethyl acetate = 3:1) afforded **5ae** in 51% yield (32.2 mg) as a white solid.  $^1\text{H}$  NMR (300 MHz,  $\text{CDCl}_3$ )  $\delta$  7.40-7.36 (m, 2H), 7.31-7.27 (m, 2H), 4.35 (q,  $J = 7.1$  Hz, 2H), 3.80-3.77 (m, 4H), 3.38-3.34 (m, 4H), 2.44 (s, 3H), 1.33 (t,  $J = 7.1$  Hz, 3H);  $^{13}\text{C}$  NMR (75 MHz,  $\text{CDCl}_3$ )  $\delta$  161.2, 140.3, 139.0, 134.9, 130.2, 128.9, 121.9, 66.6, 61.2, 55.8, 21.6, 14.3. IR (neat): 2982, 2901, 2855, 1708, 1618, 1578, 1506, 1465, 1443, 1393, 1370, 1345, 1295, 1266, 1250, 1200, 1187, 1165, 1120, 1107, 1063, 1035, 1013, 990, 915, 849, 819, 794, 773, 730, 720, 703, 694, 561, 515, 496, 486, 427  $\text{cm}^{-1}$ ; HRMS (ESI) calcd  $m/z$  for  $\text{C}_{16}\text{H}_{21}\text{N}_4\text{O}_3^+$   $[\text{M}+\text{H}]^+$ : 317.1608, found 317.1612.

### 2.5.32 Synthesis and characterization of ethyl 5-(4-iodophenyl)-1-morpholino-1*H*-1,2,3-triazole-4-carboxylate (**5af**)

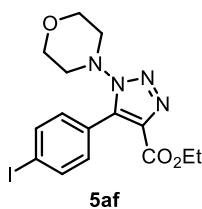

A mixture of  $\text{Ru}(\text{bpy})_3(\text{PF}_6)_2$  (1.7 mg, 0.002 mmol, 1 mol%),  $\text{NaHCO}_3$  (50.4 mg, 0.6 mmol, 3.0 equiv.), **1a** (116.1 mg, 0.26 mmol, 1.3 equiv.) and **4ad** (63.2 mg, 0.2 mmol, 1.0 equiv.) in

CH<sub>3</sub>CN (4 mL) was stirred at room temperature under blue light irradiation for 13 h. Column chromatography on silica gel (eluent: hexane to hexane/ethyl acetate = 3:1) afforded **5af** in 65% yield (55.5 mg) as a white solid. <sup>1</sup>H NMR (300 MHz, CDCl<sub>3</sub>) δ 7.86-7.82 (m, 2H), 7.26-7.22 (m, 2H), 4.36 (q, *J* = 7.1 Hz, 2H), 3.80-3.77 (m, 4H), 3.37-3.34 (m, 4H), 1.34 (t, *J* = 7.1 Hz, 3H); <sup>13</sup>C NMR (75 MHz, CDCl<sub>3</sub>) δ 161.0, 138.0, 137.4, 135.1, 131.9, 124.5, 96.8, 66.5, 61.4, 55.9, 14.3. IR (neat): 2981, 2897, 2856, 1716, 1600, 1485, 1274, 1266, 1200, 1106, 1064, 1035, 1013, 991, 850, 822, 795, 557 cm<sup>-1</sup>; HRMS (ESI) calcd *m/z* for C<sub>15</sub>H<sub>18</sub>IN<sub>4</sub>O<sub>3</sub><sup>+</sup> [M+H]<sup>+</sup>: 429.0418, found 429.0420.

### 2.5.33 Synthesis and characterization of ethyl 1-morpholino-5-[4-(trifluoromethyl)-phenyl]-1*H*-1,2,3-triazole-4-carboxylate (**5ag**)

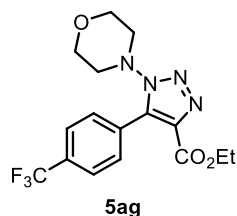

A mixture of Ru(bpy)<sub>3</sub>(PF<sub>6</sub>)<sub>2</sub> (1.7 mg, 0.002 mmol, 1 mol%), NaHCO<sub>3</sub> (50.4 mg, 0.6 mmol, 3.0 equiv.), **1a** (116.1 mg, 0.26 mmol, 1.3 equiv.) and **4ae** (51.6 mg, 0.2 mmol, 1.0 equiv.) in CH<sub>3</sub>CN (4 mL) was stirred at room temperature under blue light irradiation for 13 h. Column chromatography on silica gel (eluent: hexane to hexane/ethyl acetate = 3:1) afforded **5ag** in 60% yield (44.4 mg) as a white solid. <sup>1</sup>H NMR (300 MHz, CDCl<sub>3</sub>) δ 7.77 (d, *J* = 8.2 Hz, 2H), 7.63 (d, *J* = 8.1 Hz, 2H), 4.36 (q, *J* = 7.1 Hz, 2H), 3.81-3.78 (m, 4H), 3.40-3.36 (m, 4H), 1.33 (t, *J* = 7.1 Hz, 3H); <sup>13</sup>C NMR (75 MHz, CDCl<sub>3</sub>) δ 160.9, 137.6, 135.4, 132.1 (q, *J* = 32.7 Hz), 130.9, 128.8 (q, *J* = 1.2 Hz), 125.2 (q, *J* = 3.8 Hz), 123.9 (q, *J* = 272.5 Hz), 66.5, 61.5, 56.0, 14.2. IR (neat): 2979, 2912, 2851, 1728, 1714, 1587, 1453, 1326, 1207, 1162, 1104, 1064, 1034, 1022, 1002, 852, 841, 560 cm<sup>-1</sup>; HRMS (ESI) calcd *m/z* for C<sub>16</sub>H<sub>18</sub>F<sub>3</sub>N<sub>4</sub>O<sub>3</sub><sup>+</sup> [M+H]<sup>+</sup>: 371.1326, found 371.1326.

### 2.5.34 Synthesis and characterization of ethyl 5-(4-cyanophenyl)-1-morpholino-1*H*-1,2,3-triazole-4-carboxylate (**5ah**)

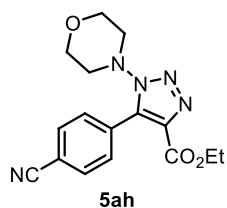

A mixture of Ru(bpy)<sub>3</sub>(PF<sub>6</sub>)<sub>2</sub> (1.7 mg, 0.002 mmol, 1 mol%), NaHCO<sub>3</sub> (50.4 mg, 0.6 mmol,

3.0 equiv.), **1a** (116.1 mg, 0.26 mmol, 1.3 equiv.) and **4af** (43.1 mg, 0.2 mmol, 1.0 equiv.) in CH<sub>3</sub>CN (4 mL) was stirred at room temperature under blue light irradiation for 13 h. Column chromatography on silica gel (eluent: hexane to hexane/ethyl acetate = 2:1) afforded **5ah** in 40% yield (26.3 mg) as a white solid. <sup>1</sup>H NMR (300 MHz, CDCl<sub>3</sub>) δ 7.83-7.79 (m, 2H), 7.66-7.62 (m, 2H), 4.37 (q, *J* = 7.1 Hz, 2H), 3.80-3.77 (m, 4H), 3.39-3.36 (m, 4H), 1.34 (t, *J* = 7.1 Hz, 3H); <sup>13</sup>C NMR (75 MHz, CDCl<sub>3</sub>) δ 160.8, 137.1, 135.5, 131.9, 131.2, 129.7, 118.2, 114.0, 66.5, 61.7, 56.0, 14.3. IR (neat): 2971, 2859, 2223, 1731, 1458, 1446, 1394, 1374, 1347, 1266, 1189, 1110, 1096, 1068, 1035, 1022, 911, 853, 835, 793, 728, 558 cm<sup>-1</sup>; HRMS (ESI) calcd *m/z* for C<sub>16</sub>H<sub>18</sub>N<sub>5</sub>O<sub>3</sub><sup>+</sup> [M+H]<sup>+</sup>: 328.1404, found 328.1406.

### 2.5.35 Synthesis and characterization of ethyl 5-(4-chlorophenyl)-1-morpholino-1*H*-1,2,3-triazole-4-carboxylate (**5ai**)

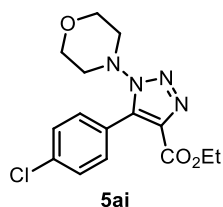

A mixture of Ru(bpy)<sub>3</sub>(PF<sub>6</sub>)<sub>2</sub> (1.7 mg, 0.002 mmol, 1 mol%), NaHCO<sub>3</sub> (50.4 mg, 0.6 mmol, 3.0 equiv.), **1a** (116.1 mg, 0.26 mmol, 1.3 equiv.) and **4ag** (44.9 mg, 0.2 mmol, 1.0 equiv.) in CH<sub>3</sub>CN (4 mL) was stirred at room temperature under blue light irradiation for 16 h. Column chromatography on silica gel (eluent: hexane to hexane/ethyl acetate = 3:1) afforded **5ai** in 64% yield (43.2 mg) as a white solid. <sup>1</sup>H NMR (300 MHz, CDCl<sub>3</sub>) δ 7.50-7.43 (m, 4H), 4.36 (q, *J* = 7.1 Hz, 2H), 3.80-3.77 (m, 4H), 3.38-3.34 (m, 4H), 1.33 (t, *J* = 7.1 Hz, 3H); <sup>13</sup>C NMR (75 MHz, CDCl<sub>3</sub>) δ 161.0, 137.8, 136.4, 135.1, 131.7, 128.5, 123.4, 66.6, 61.4, 55.9, 14.3. IR (neat): 2968, 2915, 2862, 2372, 2322, 1725, 1713, 1488, 1455, 1202, 1106, 1064, 1036, 1022, 999, 851, 824, 788, 561 cm<sup>-1</sup>; HRMS (ESI) calcd *m/z* for C<sub>15</sub>H<sub>18</sub>ClN<sub>4</sub>O<sub>3</sub><sup>+</sup> [M+H]<sup>+</sup>: 337.1062, found 337.1064.

### 2.5.36 Synthesis and characterization of ethyl 5-(2-fluorophenyl)-1-morpholino-1*H*-1,2,3-triazole-4-carboxylate (**5aj**)

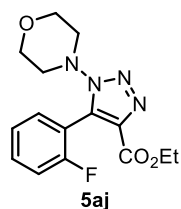

A mixture of Ru(bpy)<sub>3</sub>(PF<sub>6</sub>)<sub>2</sub> (1.7 mg, 0.002 mmol, 1 mol%), NaHCO<sub>3</sub> (50.4 mg, 0.6 mmol, 3.0 equiv.), **1a** (116.1 mg, 0.26 mmol, 1.3 equiv.) and **4ah** (41.6 mg, 0.2 mmol, 1.0 equiv.) in

CH<sub>3</sub>CN (4 mL) was stirred at room temperature under blue light irradiation for 11 h. Column chromatography on silica gel (eluent: hexane to hexane/ethyl acetate = 3:1) afforded **5aj** in 69% yield (44.3 mg) as a white solid. <sup>1</sup>H NMR (300 MHz, CDCl<sub>3</sub>) δ 7.57-7.49 (m, 1H), 7.40-7.34 (m, 1H), 7.31-7.18 (m, 2H), 4.33 (q, *J* = 7.1 Hz, 2H), 3.77-3.74 (m, 4H), 3.38-3.35 (m, 4H), 1.28 (t, *J* = 7.1 Hz, 3H); <sup>13</sup>C NMR (75 MHz, CDCl<sub>3</sub>) δ 161.6, 160.0 (d, *J* = 250.3 Hz), 136.0, 134.2, 132.3 (d, *J* = 8.4 Hz), 132.1 (d, *J* = 1.9 Hz), 124.0 (d, *J* = 3.6 Hz), 115.8 (d, *J* = 21.5 Hz), 113.9 (d, *J* = 15.0 Hz), 66.7, 61.3, 55.8, 14.2; <sup>19</sup>F NMR (282 MHz, CDCl<sub>3</sub>) δ -111.9. IR (neat): 2974, 2898, 2859, 1728, 1584, 1459, 1377, 1348, 1224, 1194, 1107, 1070, 1038, 918, 849, 820, 772, 563 cm<sup>-1</sup>; HRMS (ESI) calcd *m/z* for C<sub>15</sub>H<sub>18</sub>FN<sub>4</sub>O<sub>3</sub><sup>+</sup> [M+H]<sup>+</sup>: 321.1357, found 321.1360.

### 2.5.37 Synthesis and characterization of ethyl 5-(3-bromophenyl)-1-morpholino-1*H*-1,2,3-triazole-4-carboxylate (**5ak**)

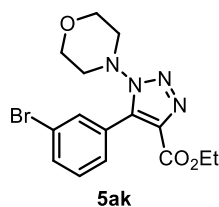

A mixture of Ru(bpy)<sub>3</sub>(PF<sub>6</sub>)<sub>2</sub> (1.7 mg, 0.002 mmol, 1 mol%), NaHCO<sub>3</sub> (50.4 mg, 0.6 mmol, 3.0 equiv.), **1a** (116.1 mg, 0.26 mmol, 1.3 equiv.) and **4ai** (53.8 mg, 0.2 mmol, 1.0 equiv.) in CH<sub>3</sub>CN (4 mL) was stirred at room temperature under blue light irradiation for 15 h. Column chromatography on silica gel (eluent: hexane to hexane/ethyl acetate = 3:1) afforded **5ak** in 66% yield (50.3 mg) as a white solid. <sup>1</sup>H NMR (300 MHz, CDCl<sub>3</sub>) δ 7.66-7.62 (m, 2H), 7.46-7.35 (m, 2H), 4.36 (q, *J* = 7.1 Hz, 2H), 3.81-3.78 (m, 4H), 3.38-3.35 (m, 4H), 1.32 (t, *J* = 7.1 Hz, 3H); <sup>13</sup>C NMR (75 MHz, CDCl<sub>3</sub>) δ 160.8, 137.2, 135.2, 133.2, 133.1, 129.6, 129.0, 126.9, 121.9, 66.5, 61.4, 55.9, 14.2. IR (neat): 3057, 2979, 2901, 2862, 1735, 1563, 1265, 1195, 1105, 1070, 1038, 1019, 899, 849, 790, 752, 723, 693, 561 cm<sup>-1</sup>; HRMS (ESI) calcd *m/z* for C<sub>15</sub>H<sub>18</sub>BrN<sub>4</sub>O<sub>3</sub><sup>+</sup> [M+H]<sup>+</sup>: 381.0557, found 381.0556.

### 2.5.38 Synthesis and characterization of ethyl 1-morpholino-5-(*o*-tolyl)-1*H*-1,2,3-triazole-4-carboxylate (**5al**)

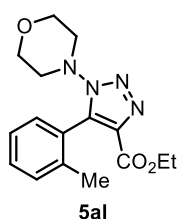

A mixture of Ru(bpy)<sub>3</sub>(PF<sub>6</sub>)<sub>2</sub> (1.7 mg, 0.002 mmol, 1 mol%), NaHCO<sub>3</sub> (50.4 mg, 0.6 mmol,

3.0 equiv.), **1a** (116.1 mg, 0.26 mmol, 1.3 equiv.) and **4aj** (40.9 mg, 0.2 mmol, 1.0 equiv.) in CH<sub>3</sub>CN (4 mL) was stirred at room temperature under blue light irradiation for 15 h. Column chromatography on silica gel (eluent: hexane to hexane/ethyl acetate = 3:1) afforded **5al** in 44% yield (27.6 mg) as a white solid. <sup>1</sup>H NMR (300 MHz, CDCl<sub>3</sub>) δ 7.44-7.38 (m, 1H), 7.34-7.25 (m, 2H), 7.11-7.08 (m, 1H), 4.28 (q, *J* = 7.1 Hz, 2H), 3.71 (t, *J* = 4.7 Hz, 4H), 3.41-3.25 (m, 4H), 2.11 (s, 3H), 1.22 (t, *J* = 7.1 Hz, 3H); <sup>13</sup>C NMR (75 MHz, CDCl<sub>3</sub>) δ 160.9, 139.0, 137.3, 135.9, 130.2, 130.1, 129.9, 125.7, 125.6, 66.5, 61.1, 55.8, 19.9, 14.1. IR (neat): 2992, 2968, 2923, 2864, 2370, 2325, 1729, 1437, 1375, 1199, 1107, 1031, 769 cm<sup>-1</sup>; HRMS (ESI) calcd *m/z* for C<sub>16</sub>H<sub>21</sub>N<sub>4</sub>O<sub>3</sub><sup>+</sup> [M+H]<sup>+</sup>: 317.1608, found 317.1609.

### 2.5.39 Synthesis and characterization of ethyl 5-[3-(methoxycarbonyl)phenyl]-1-morpholino-1*H*-1,2,3-triazole-4-carboxylate (**5am**)

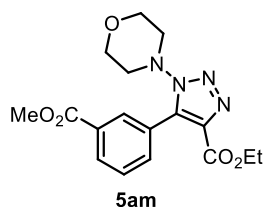

A mixture of Ru(bpy)<sub>3</sub>(PF<sub>6</sub>)<sub>2</sub> (1.7 mg, 0.002 mmol, 1 mol%), NaHCO<sub>3</sub> (50.4 mg, 0.6 mmol, 3.0 equiv.), **1a** (116.1 mg, 0.26 mmol, 1.3 equiv.) and **4ak** (49.7 mg, 0.2 mmol, 1.0 equiv.) in CH<sub>3</sub>CN (4 mL) was stirred at room temperature under blue light irradiation for 15 h. Column chromatography on silica gel (eluent: hexane to hexane/ethyl acetate = 2:1) afforded **5am** in 64% yield (46.4 mg) as a colorless sticky oil. <sup>1</sup>H NMR (300 MHz, CDCl<sub>3</sub>) δ 8.20-8.17 (m, 2H), 7.74-7.71 (m, 1H), 7.62-7.57 (m, 1H), 4.36 (q, *J* = 7.1 Hz, 2H), 3.96 (s, 3H), 3.80-3.77 (m, 4H), 3.40-3.37 (m, 4H), 1.31 (t, *J* = 7.1 Hz, 3H); <sup>13</sup>C NMR (75 MHz, CDCl<sub>3</sub>) δ 166.3, 160.9, 137.9, 135.2, 134.7, 131.6, 131.1, 130.2, 128.3, 125.4, 66.5, 61.4, 55.9, 52.5, 14.2. IR (neat): 2968, 2862, 1718, 1563, 1437, 1276, 1263, 1236, 1196, 1107, 1064, 1033, 757, 720, 691, 560 cm<sup>-1</sup>; HRMS (ESI) calcd *m/z* for C<sub>17</sub>H<sub>21</sub>N<sub>4</sub>O<sub>5</sub><sup>+</sup> [M+H]<sup>+</sup>: 361.1506, found 361.1507.

### 2.5.40 Synthesis and characterization of ethyl 1-morpholino-5-{4-[(trimethylsilyl)ethynyl]phenyl}-1*H*-1,2,3-triazole-4-carboxylate (**5an**)

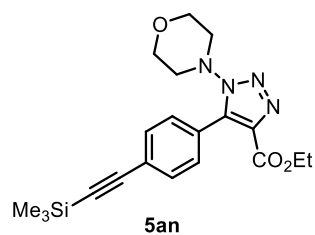

A mixture of Ru(bpy)<sub>3</sub>(PF<sub>6</sub>)<sub>2</sub> (1.7 mg, 0.002 mmol, 1 mol%), NaHCO<sub>3</sub> (50.4 mg, 0.6 mmol, 3.0 equiv.), **1a** (116.1 mg, 0.26 mmol, 1.3 equiv.) and **4al** (57.3 mg, 0.2 mmol, 1.0 equiv.) in CH<sub>3</sub>CN (4 mL) was stirred at room temperature under blue light irradiation for 13 h. Column chromatography on silica gel (eluent: hexane to hexane/ethyl acetate = 3:1) afforded **5an** in 44% yield (35.4 mg) as a white solid. <sup>1</sup>H NMR (300 MHz, CDCl<sub>3</sub>) δ 7.59-7.56 (m, 2H), 7.45-7.42 (m, 2H), 4.35 (q, *J* = 7.1 Hz, 2H), 3.78-3.75 (m, 4H), 3.36-3.33 (m, 4H), 1.31 (t, *J* = 7.1 Hz, 3H), 0.28 (s, 9H); <sup>13</sup>C NMR (75 MHz, CDCl<sub>3</sub>) δ 161.0, 138.2, 135.2, 131.6, 130.2, 125.05, 124.96, 104.3, 96.7, 66.6, 61.3, 55.8, 14.3, -0.0. IR (neat): 2960, 2894, 2856, 2150, 1720, 1498, 1248, 1211, 1108, 1068, 1035, 1019, 853, 838, 759, 672, 559 cm<sup>-1</sup>; HRMS (ESI) calcd *m/z* for C<sub>20</sub>H<sub>27</sub>N<sub>4</sub>O<sub>3</sub>Si<sup>+</sup> [M+H]<sup>+</sup>: 399.1847, found 399.1846.

#### 2.5.41 Synthesis and characterization of ethyl 1-(dimethylamino)-5-[3-(trifluoromethyl)phenyl]-1*H*-1,2,3-triazole-4-carboxylate (**5ao**)

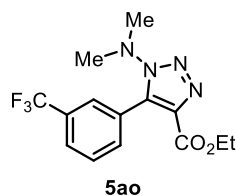

A mixture of Ru(bpy)<sub>3</sub>(PF<sub>6</sub>)<sub>2</sub> (2.2 mg, 0.0026 mmol, 1 mol%), NaHCO<sub>3</sub> (65.5 mg, 0.78 mmol, 3.0 equiv.), **1a** (150.9 mg, 0.338 mmol, 1.3 equiv.) and **4am** (56.2 mg, 0.26 mmol, 1.0 equiv.) in CH<sub>3</sub>CN (5.2 mL) was stirred at room temperature under blue light irradiation for 14 h. Column chromatography on silica gel (eluent: hexane to hexane/ethyl acetate = 3:1) afforded **5ao** in 71% yield (60.2 mg) as a white solid. <sup>1</sup>H NMR (300 MHz, CDCl<sub>3</sub>) δ 7.78-7.75 (m, 2H), 7.72-7.61 (m, 2H), 4.35 (q, *J* = 7.1 Hz, 2H), 3.02 (s, 6H), 1.30 (t, *J* = 7.1 Hz, 3H); <sup>13</sup>C NMR (75 MHz, CDCl<sub>3</sub>) δ 160.9, 137.4, 135.3, 133.7 (q, *J* = 1.5 Hz), 130.7 (q, *J* = 32.8 Hz), 128.7, 127.3 (q, *J* = 4.0 Hz), 126.7 (q, *J* = 3.7 Hz), 126.3, 123.9 (q, *J* = 272.5 Hz), 61.4, 47.7, 14.1; <sup>19</sup>F NMR (282 MHz, CDCl<sub>3</sub>) δ -62.7. IR (neat): 2974, 1714, 1576, 1442, 1344, 1329, 1319, 1273, 1182, 1167, 1122, 1096, 1078, 1047, 1027, 905, 807, 698 cm<sup>-1</sup>; HRMS (ESI) calcd *m/z* for C<sub>14</sub>H<sub>16</sub>F<sub>3</sub>N<sub>4</sub>O<sub>2</sub><sup>+</sup> [M+H]<sup>+</sup>: 329.1220, found 329.1219.

#### 2.6 Synthesis and characterization of 1,2,3-triazolium salts **7**

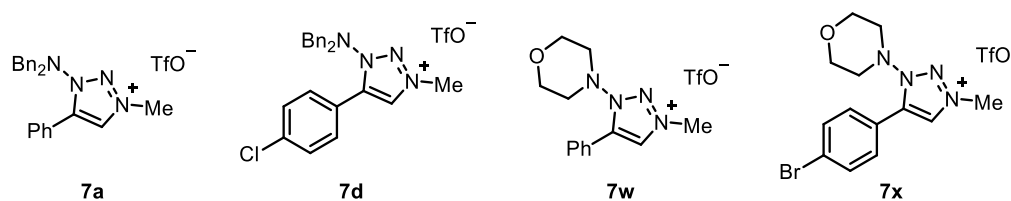



The carbene salts **7** were synthesized by modified previously reported procedures,<sup>[17]</sup> which are described below.

### 2.6.1 Procedure for the preparation of 1-(dibenzylamino)-3-methyl-5-phenyl-1*H*-1,2,3-triazol-3-ium trifluoromethanesulfonate (**7a**)

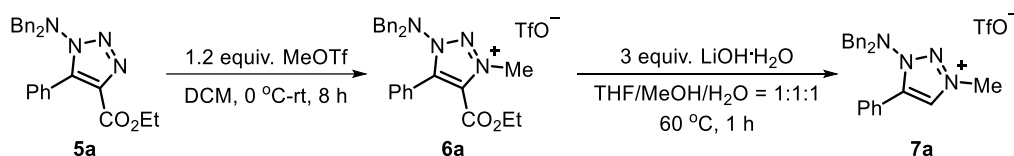

A solution of **5a** (743 mg, 1.8 mmol, 1.0 equiv.) in dry CH<sub>2</sub>Cl<sub>2</sub> (30 mL) was cooled to 0 °C under N<sub>2</sub>. Then, MeOTf (245 μL, 2.16 mmol, 1.2 equiv.) dissolved in CH<sub>2</sub>Cl<sub>2</sub> (5 mL) was added over one hour using a syringe pump. After that, the mixture was stirred at room temperature for additional 7 hours. Evaporation of the organic solvent under the reduced pressure afforded crude **6a**, which was used directly in the next step without further purification.

To a stirred solution of the above crude **6a** in a THF/MeOH/H<sub>2</sub>O mixture (15 mL, 1/1/1 volume ratio) was added LiOH·H<sub>2</sub>O (227 mg, 5.4 mmol, 3 equiv.). The resulting suspension was stirred at 60 °C for one hour. Then, the reaction was diluted with water, extracted with CH<sub>2</sub>Cl<sub>2</sub> and the organic phase was dried over anhydrous Na<sub>2</sub>SO<sub>4</sub>. Evaporation of the solvents under reduced pressure afforded a residue, which was purified by column chromatography on silica gel (eluent: CH<sub>2</sub>Cl<sub>2</sub> to CH<sub>2</sub>Cl<sub>2</sub>/MeOH = 10:1) to afford **7a** in 89% yield (804 mg) over two steps as a colorless sticky oil. <sup>1</sup>H NMR (300 MHz, CDCl<sub>3</sub>) δ 8.68 (s, 1H), 7.49-7.43 (m, 1H), 7.37-7.31 (m, 2H), 7.28-7.17 (m, 8H), 7.06-7.01 (m, 4H), 4.45 (s, 3H), 4.44 (s, 4H); <sup>13</sup>C NMR (75 MHz, CDCl<sub>3</sub>) δ 143.1, 133.0, 131.5, 129.4, 129.3, 129.1, 129.00, 128.97, 128.8, 121.5, 120.8 (q, *J* = 320.3 Hz), 62.3, 41.5; <sup>19</sup>F NMR (282 MHz, CDCl<sub>3</sub>) δ -78.3. IR (neat): 3102, 3064, 3035, 1610, 1584, 1493, 1453, 1256, 1223, 1148, 1028, 756, 742, 698, 635, 597, 572, 562, 517, 493 cm<sup>-1</sup>; HRMS (ESI) calcd *m/z* for C<sub>23</sub>H<sub>23</sub>N<sub>4</sub><sup>+</sup> [M-OTf]<sup>+</sup>: 355.1917, found 355.1920.

### 2.6.2 Procedure for the preparation of 5-(4-chlorophenyl)-1-(dibenzylamino)-3-methyl-1*H*-1,2,3-triazol-3-ium trifluoromethanesulfonate (**7d**)

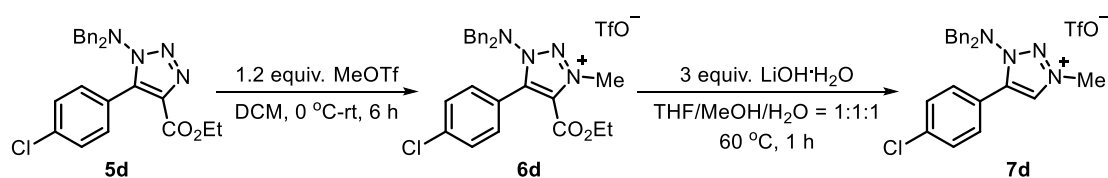

A solution of **5d** (626 mg, 1.4 mmol, 1.0 equiv.) in dry CH<sub>2</sub>Cl<sub>2</sub> (20 mL) was cooled to 0 °C

under N<sub>2</sub>. Then, MeOTf (190  $\mu$ L, 1.68 mmol, 1.2 equiv.) dissolved in CH<sub>2</sub>Cl<sub>2</sub> (5 mL) was added over one hour using a syringe pump. After that, the mixture was stirred at room temperature for additional 5 hours. Evaporation of the organic solvent under the reduced pressure afforded crude **6d**, which was used directly in the next step without further purification.

To a stirred solution of the above crude **6d** in a THF/MeOH/H<sub>2</sub>O mixture (15 mL, 1/1/1 volume ratio) was added LiOH·H<sub>2</sub>O (176 mg, 4.2 mmol, 3 equiv.). The resulting suspension was stirred at 60 °C for one hour. Then, the reaction was diluted with water, extracted with CH<sub>2</sub>Cl<sub>2</sub> and the organic phase was dried over anhydrous Na<sub>2</sub>SO<sub>4</sub>. Evaporation of the solvents under reduced pressure afforded a residue, which was purified by column chromatography on silica gel (eluent: CH<sub>2</sub>Cl<sub>2</sub> to CH<sub>2</sub>Cl<sub>2</sub>/MeOH = 10:1) to afford **7d** in 89% yield (670 mg) over two steps as a colorless sticky oil. <sup>1</sup>H NMR (300 MHz, CDCl<sub>3</sub>)  $\delta$  8.75 (s, 1H), 7.31-7.19 (m, 8H), 7.16-7.12 (m, 2H), 7.05-7.00 (m, 4H), 4.46 (s, 3H), 4.45 (s, 4H); <sup>13</sup>C NMR (75 MHz, CDCl<sub>3</sub>)  $\delta$  142.2, 138.0, 133.0, 130.5, 129.6, 129.4, 129.1, 120.7 (q,  $J$  = 320.3 Hz), 120.0, 62.5, 41.6; <sup>19</sup>F NMR (282 MHz, CDCl<sub>3</sub>)  $\delta$  -78.4. IR (neat): 3078, 3030, 2971, 1739, 1613, 1488, 1450, 1373, 1365, 1273, 1254, 1220, 1157, 1092, 1027, 827, 821, 756, 702, 637, 572, 517, 503 cm<sup>-1</sup>; HRMS (ESI) calcd  $m/z$  for C<sub>23</sub>H<sub>22</sub>ClN<sub>4</sub><sup>+</sup> [M-OTf]<sup>+</sup>: 389.1528, found 389.1528.

### 2.6.3 Procedure for the preparation of 3-methyl-1-morpholino-5-phenyl-1H-1,2,3-triazol-3-ium trifluoromethanesulfonate (**7w**)

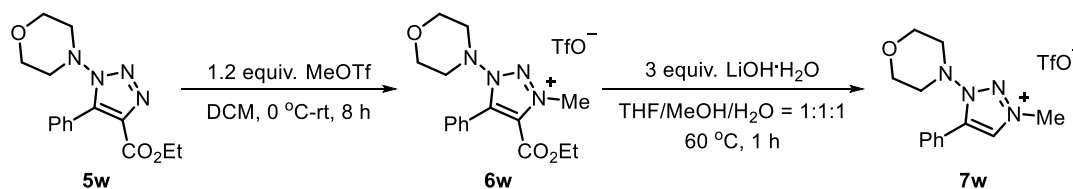

A solution of **5w** (327 mg, 1.08 mmol, 1.0 equiv.) in dry CH<sub>2</sub>Cl<sub>2</sub> (10 mL) was cooled to 0 °C under N<sub>2</sub>. Then, MeOTf (147  $\mu$ L, 1.296 mmol, 1.2 equiv.) dissolved in CH<sub>2</sub>Cl<sub>2</sub> (4 mL) was added over one hour using a syringe pump. After that, the mixture was stirred at room temperature for additional 7 hours. Evaporation of the organic solvent under the reduced pressure afforded crude **6w**, which was used directly in the next step without further purification.

To a stirred solution of the above crude **6w** in a THF/MeOH/H<sub>2</sub>O mixture (6 mL, 1/1/1 volume ratio) was added LiOH·H<sub>2</sub>O (136 mg, 3.24 mmol, 3 equiv.). The resulting suspension was stirred at 60 °C for one hour. Then, the reaction was diluted with CH<sub>2</sub>Cl<sub>2</sub>, dried directly over anhydrous Na<sub>2</sub>SO<sub>4</sub>, followed by filtration. Evaporation of the solvents under reduced pressure afforded a residue, which was purified by column chromatography on silica gel (eluent:

CH<sub>2</sub>Cl<sub>2</sub> to CH<sub>2</sub>Cl<sub>2</sub>/MeOH = 10:1) to afford **7w** in 71% yield (304 mg) over two steps as a white solid. <sup>1</sup>H NMR (300 MHz, CDCl<sub>3</sub>) δ 8.81 (s, 1H), 7.86-7.82 (m, 2H), 7.56-7.48 (m, 3H), 4.35 (s, 3H), 3.87-3.84 (m, 4H), 3.42-3.39 (m, 4H); <sup>13</sup>C NMR (75 MHz, CDCl<sub>3</sub>) δ 140.2, 131.9, 129.4, 129.3, 128.8, 121.6, 120.6 (q, *J* = 320.3 Hz), 66.2, 55.9, 41.0; <sup>19</sup>F NMR (282 MHz, CDCl<sub>3</sub>) δ -78.5. IR (neat): 3088, 3033, 2864, 1739, 1488, 1367, 1264, 1223, 1204, 1146, 1104, 1033, 1017, 906, 782, 694, 634, 573, 556, 516 cm<sup>-1</sup>; HRMS (ESI) calcd *m/z* for C<sub>13</sub>H<sub>17</sub>N<sub>4</sub>O<sup>+</sup> [M-OTf]<sup>+</sup>: 245.1397, found 245.1397.

#### 2.6.4 Procedure for the preparation of 5-(4-bromophenyl)-3-methyl-1-morpholino-1*H*-1,2,3-triazol-3-ium trifluoromethanesulfonate (**7x**)

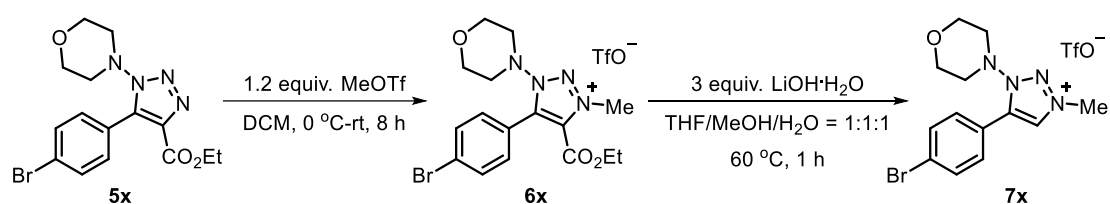

A solution of **5x** (252 mg, 0.66 mmol, 1.0 equiv.) in dry CH<sub>2</sub>Cl<sub>2</sub> (15 mL) was cooled to 0 °C under N<sub>2</sub>. Then, MeOTf (89.7 μL, 0.792 mmol, 1.2 equiv.) dissolved in CH<sub>2</sub>Cl<sub>2</sub> (4 mL) was added over one hour by a syringe pump. After that, the mixture was stirred at room temperature for additional 7 hours. Evaporation of the organic solvent under the reduced pressure afforded crude **6x**, which was used directly in the next step without further purification.

To a stirred solution of the above crude **6x** in a THF/MeOH/H<sub>2</sub>O mixture (6 mL, 1/1/1 volume ratio) was added LiOH·H<sub>2</sub>O (83.1 mg, 1.98 mmol, 3 equiv.). The resulting suspension was stirred at 60 °C for one hour. Then, the reaction was diluted with CH<sub>2</sub>Cl<sub>2</sub>, dried directly over anhydrous Na<sub>2</sub>SO<sub>4</sub>, followed by filtration. Evaporation of the solvents under reduced pressure afforded a residue, which was purified by column chromatography on silica gel (eluent: CH<sub>2</sub>Cl<sub>2</sub> to CH<sub>2</sub>Cl<sub>2</sub>/MeOH = 10:1) to afford **7x** in 61% yield (190 mg) over two steps as a white solid. <sup>1</sup>H NMR (300 MHz, CDCl<sub>3</sub>) δ 8.95 (s, 1H), 7.76-7.73 (m, 2H), 7.67-7.64 (m, 2H), 4.37 (s, 3H), 3.89-3.86 (m, 4H), 3.43-3.40 (m, 4H); <sup>13</sup>C NMR (75 MHz, CDCl<sub>3</sub>) δ 139.5, 132.8, 130.4, 129.9, 126.9, 120.7, 120.6 (q, *J* = 320.3 Hz), 66.3, 56.1, 41.3; <sup>19</sup>F NMR (282 MHz, CDCl<sub>3</sub>) δ -78.5. IR (neat): 3108, 2971, 2870, 1739, 1603, 1491, 1370, 1277, 1255, 1225, 1158, 1148, 1107, 1075, 1029, 1007, 903, 847, 828, 635, 594, 573, 562, 517, 487 cm<sup>-1</sup>; HRMS (ESI) calcd *m/z* for C<sub>13</sub>H<sub>16</sub>BrN<sub>4</sub>O<sup>+</sup> [M-OTf]<sup>+</sup>: 323.0502, found 323.0502.

## 2.7 Synthesis and characterization of rhodium complexes **8**

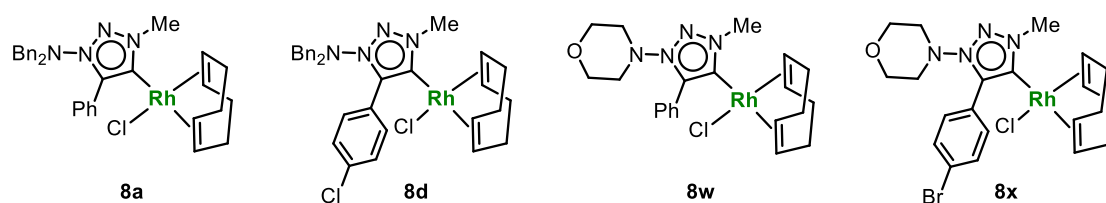

The rhodium complexes **8** were synthesized using modified reported procedures,<sup>[18, 19]</sup> which are described below.

### 2.7.1 Procedure for the preparation of (1*Z*,5*Z*)-cycloocta-1,5-diene [1-(dibenzylamino)-3-methyl-5-phenyl-2,3-dihydro-1*H*-1,2,3-triazol-4-yl]rhodium(I) chloride (**8a**)

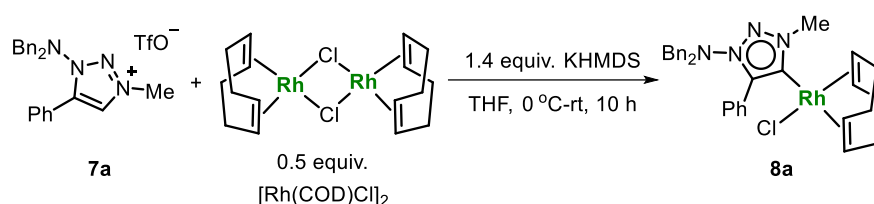

THF (4 mL) was added to a solid mixture of  $[\text{Rh}(\text{COD})\text{Cl}]_2$  (49.3 mg, 0.1 mmol, 0.5 equiv.) and KHMDS (55.9 mg, 0.28 mmol, 1.4 equiv.) under a  $\text{N}_2$  atmosphere. The resulting solution was stirred for 5 minutes at 0 °C. Then, **7a** (101 mg, 0.2 mmol, 1.0 equiv.) was added in one portion. The resulting mixture was stirred at 0 °C for one hour, then stirred at room temperature for an additional 9 hours and filtered through a pad of celite. The solvent was removed under vacuum and the residue was purified by column chromatography on silica gel (eluent:  $\text{CH}_2\text{Cl}_2/\text{MeOH} = 100:1$ ) to afford **8a** in 60% yield (71.6 mg) as a yellow solid.  $^1\text{H}$  NMR (400 MHz,  $\text{CDCl}_3$ , 55 °C)  $\delta$  7.88-7.85 (m, 2H), 7.36-7.32 (m, 3H), 7.23-7.18 (m, 6H), 7.00 (bs, 4H), 4.93 (bs, 2H), 4.54 (s, 3H), 4.23 (bs, 4H), 2.76-2.72 (m, 2H), 2.25-1.65 (m, 8H);  $^{13}\text{C}$  NMR (100 MHz,  $\text{CDCl}_3$ , 55 °C)  $\delta$  171.8 (d,  $J = 46.9$  Hz), 143.2 (d,  $J = 2.6$  Hz), 134.2, 130.4, 129.4, 128.9, 128.8, 128.5, 127.5, 127.4, 96.6 (d,  $J = 7.1$  Hz), 68.2 (br), 61.6, 42.8, 32.7 (br), 29.1. IR (film): 3030, 2932, 2912, 2872, 2827, 2213, 1496, 1454, 1430, 1296, 1279, 1260, 1065, 1028, 907, 863, 753, 725, 694, 643, 630, 615, 607, 568, 524, 499, 448  $\text{cm}^{-1}$ ; HRMS (ESI) calcd  $m/z$  for  $\text{C}_{31}\text{H}_{34}\text{ClN}_4\text{NaRh}^+ [\text{M}+\text{Na}]^+$ : 623.1419, found 623.1424.

### 2.7.2 Procedure for the preparation of (1*Z*,5*Z*)-cycloocta-1,5-diene [5-(4-chlorophenyl)-1-(dibenzylamino)-3-methyl-2,3-dihydro-1*H*-1,2,3-triazol-4-yl]rhodi-um(I) chloride (**8d**)

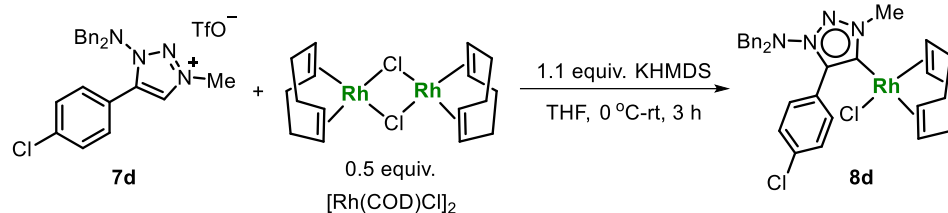

THF (2 mL) was added to a solid mixture of  $[\text{Rh}(\text{COD})\text{Cl}]_2$  (24.7 mg, 0.05 mmol, 0.5 equiv.) and KHMDS (21.9 mg, 0.11 mmol, 1.1 equiv.) under a  $\text{N}_2$  atmosphere. The resulting solution was stirred for 10 minutes at 0 °C. Then a solution of **7d** (53.9 mg, 0.1 mmol, 1.0 equiv.) dissolved in THF (1 mL) was added dropwise over 30 minutes using a syringe pump. The mixture was further stirred at 0 °C for 30 minutes, and then at room temperature for an additional 2 hours. After that, the reaction mixture was filtered through a pad of celite. The solvent was removed under vacuum and the residue was purified by column chromatography on silica gel (eluent:  $\text{CH}_2\text{Cl}_2/\text{MeOH} = 100:1$ ) to afford **8d** in 60% yield (38.4 mg) as a yellow solid.  $^1\text{H}$  NMR (600 MHz,  $\text{CDCl}_3$ , 55 °C)  $\delta$  7.83-7.80 (m, 2H), 7.30-7.28 (m, 2H), 7.24-7.20 (m, 6H), 6.97 (bs, 4H), 4.94 (bs, 2H), 4.55 (s, 3H), 4.24 (bs, 4H), 3.01 (bs, 1H), 2.50-2.18 (m, 4H), 1.82-1.50 (m, 5H);  $^{13}\text{C}$  NMR (150 MHz,  $\text{CDCl}_3$ , 55 °C)  $\delta$  172.3 (d,  $J = 46.8$  Hz), 142.4, 135.1, 134.1, 131.6, 129.5, 128.9, 128.7, 127.7, 126.0, 97.1 (d,  $J = 7.1$  Hz), 68.5 (br), 62.0 (br), 42.9, 33.4 (br), 32.4 (br), 29.1. IR (film): 3062, 3031, 2988, 2931, 2913, 2873, 2827, 1711, 1602, 1519, 1496, 1455, 1430, 1362, 1331, 1305, 1290, 1268, 1220, 1090, 1065, 1029, 1015, 994, 831, 816, 747, 735, 728, 699, 679, 639, 602, 528, 503, 485  $\text{cm}^{-1}$ ; HRMS (ESI) calcd  $m/z$  for  $\text{C}_{31}\text{H}_{33}\text{ClN}_4\text{Rh}^+ [\text{M}-\text{Cl}]^+$ : 599.1443, found 599.1443.

### 2.7.3 Procedure for the preparation of (1*Z*,5*Z*)-cycloocta-1,5-diene (3-methyl-1-morpholino-5-phenyl-2,3-dihydro-1*H*-1,2,3-triazol-4-yl)rhodium(I) chloride (**8w**)

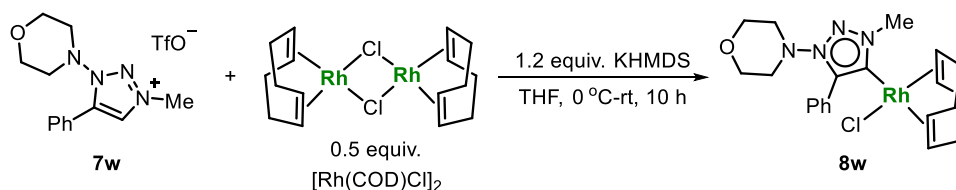

THF (4 mL) was added to a solid mixture of  $[\text{Rh}(\text{COD})\text{Cl}]_2$  (49.3 mg, 0.1 mmol, 0.5 equiv.) and KHMDS (47.9 mg, 0.24 mmol, 1.2 equiv.) under a  $\text{N}_2$  atmosphere. The resulting solution was stirred at 0 °C for 5 minutes. Then **7w** (78.9 mg, 0.2 mmol, 1.0 equiv.) was added in one portion. The resulting mixture was stirred at 0 °C for one hour, and then at room temperature

for an additional 9 hours. Then, the reaction mixture was filtered through a pad of celite. The solvent was removed under vacuum and the residue was purified by column chromatography on silica gel (eluent: CH<sub>2</sub>Cl<sub>2</sub>/MeOH = 50:1) to afford **8w** in 70% yield (68.3 mg) as a yellow solid. <sup>1</sup>H NMR (600 MHz, CDCl<sub>3</sub>, 55 °C) δ 8.48-8.46 (m, 2H), 7.53-7.50 (m, 2H), 7.47-7.45 (m, 1H), 5.04-4.97 (m, 2H), 4.53 (s, 3H), 3.82 (t, *J* = 4.7 Hz, 4H), 3.31-3.09 (m, 5H), 2.62 (bs, 1H), 2.32-2.28 (m, 3H), 1.86-1.74 (m, 4H), 1.64-1.58 (m, 1H); <sup>13</sup>C NMR (150 MHz, CDCl<sub>3</sub>, 55 °C) δ 172.4 (d, *J* = 46.7 Hz), 140.5 (d, *J* = 2.5 Hz), 130.0, 129.3, 128.0, 127.5, 96.9, 69.1 (br), 67.8 (br), 66.5, 55.8, 42.8, 33.5 (br), 32.0 (br), 29.1 (br). IR (film): 2962, 2929, 2913, 2865, 2827, 1710, 1456, 1430, 1403, 1331, 1306, 1264, 1215, 1108, 1071, 1060, 1016, 994, 911, 863, 849, 768, 732, 693, 564, 487, 449 cm<sup>-1</sup>; HRMS (ESI) calcd *m/z* for C<sub>21</sub>H<sub>28</sub>ClN<sub>4</sub>NaORh<sup>+</sup> [M+Na]<sup>+</sup>: 513.0899, found 513.0888.

#### 2.7.4 Procedure for the preparation of (1*Z*,5*Z*)-cycloocta-1,5-diene [5-(4-bromo-phenyl)-3-methyl-1-morpholino-2,3-dihydro-1*H*-1,2,3-triazol-4-yl]rhodium(I) chloride (**8x**)

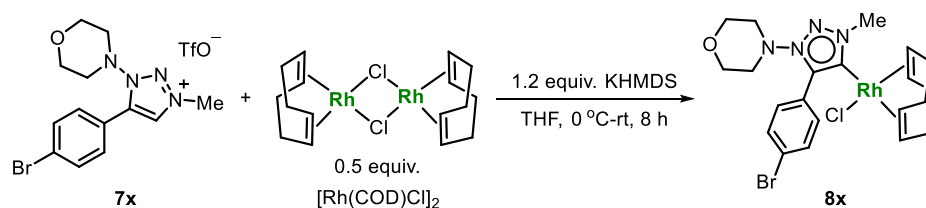

THF (4 mL) was added to a solid mixture of [Rh(COD)Cl]<sub>2</sub> (49.3 mg, 0.1 mmol, 0.5 equiv.) and KHMDS (47.9 mg, 0.24 mmol, 1.2 equiv.) under a N<sub>2</sub> atmosphere. The resulting solution was stirred at 0 °C for 5 minutes. Then **7x** (94.7 mg, 0.2 mmol, 1.0 equiv.) was added in one portion. The resulting mixture was stirred at 0 °C for one hour, and then stirred at room temperature for additional 7 hours. Then, the reaction mixture was filtered through a pad of celite. The solvent was removed under vacuum and the residue was purified by column chromatography on silica gel (eluent: CH<sub>2</sub>Cl<sub>2</sub>/MeOH = 50:1) to afford **8x** in 81% yield (92.6 mg) as a yellow solid. <sup>1</sup>H NMR (300 MHz, CDCl<sub>3</sub>) δ 8.47-8.43 (m, 2H), 7.69-7.65 (m, 2H), 5.07 (bs, 1H), 4.95 (bs, 1H), 4.53 (s, 3H), 3.85 (t, *J* = 4.7 Hz, 4H), 3.27-3.19 (m, 5H), 2.60 (bs, 1H), 2.36-2.28 (m, 3H), 1.89-1.87 (m, 4H), 1.67-1.56 (m, 1H); <sup>13</sup>C NMR (100 MHz, CDCl<sub>3</sub>) δ 172.6 (d, *J* = 46.8 Hz), 139.4 (d, *J* = 2.5 Hz), 131.39, 131.35, 126.2, 123.9, 97.5 (d, *J* = 7.2 Hz), 97.2 (d, *J* = 7.3 Hz), 69.3 (d, *J* = 14.6 Hz), 68.0 (d, *J* = 14.5 Hz), 66.5, 55.8, 43.0, 33.5, 32.1, 29.5, 28.9. IR (film): 2959, 2929, 2916, 2862, 2829, 2218, 1702, 1594, 1455, 1429, 1415, 1391, 1304, 1286, 1263, 1108, 1070, 1008, 909, 864, 849, 826, 724, 685, 671, 644, 633, 622, 613, 563, 516, 489 cm<sup>-1</sup>; HRMS (ESI) calcd *m/z* for C<sub>21</sub>H<sub>27</sub>BrClN<sub>4</sub>NaORh<sup>+</sup> [M+Na]<sup>+</sup>: 591.0004,

found 590.9997.

## 2.8 Synthesis and characterization of rhodium dicarbonyl complexes 9

### 2.8.1 Procedure for the preparation of [1-(dibenzylamino)-3-methyl-5-phenyl-2,3-dihydro-1*H*-1,2,3-triazol-4-yl]rhodium(I) chloride dicarbonyl (**9a**)

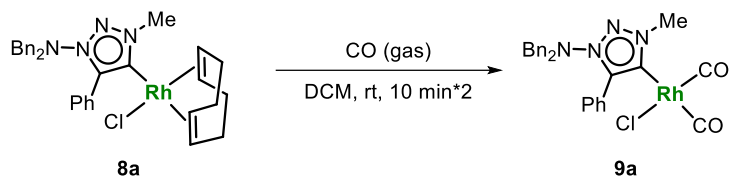

CO was bubbled through a solution of **8a** (39.2 mg, 0.0652 mmol, 1.0 equiv.) in DCM (10 mL) for 10 min. The solvent was then removed under reduced pressure and the residue was dried in high vacuum. In order to ensure reaction completion, the residue was again dissolved in DCM (10 mL) and CO was bubbled through the solution for a second time for an additional 10 min. After this, the solvent was removed until residual volume of approximately 1 mL, and hexane (40 mL) was slowly added to form a suspension. Filtration of the reaction mixture through a pad of celite afforded a light yellow solution. The solvent was then removed under reduced pressure, and the residue was dried in high vacuum to afford **9a** in 75% yield (26.8 mg) as a light yellow oil.  $^1\text{H NMR}$  (300 MHz,  $\text{CDCl}_3$ )  $\delta$  7.40-7.21 (m, 11H), 7.03-6.99 (m, 4H), 4.43 (s, 3H), 4.30 (s, 4H);  $^{13}\text{C NMR}$  (75 MHz,  $\text{CDCl}_3$ )  $\delta$  185.9 (d,  $J = 54.2$  Hz), 183.0 (d,  $J = 75.3$  Hz), 162.1 (d,  $J = 39.5$  Hz), 146.1 (d,  $J = 3.1$  Hz), 133.9, 130.6, 129.6, 129.3, 129.0, 128.7, 127.8, 126.3, 61.8, 43.5. IR (film): 2953, 2067, 1990, 1771, 1644, 1431, 1361, 1263, 1156, 1027, 861, 800, 735, 696, 568, 523, 494  $\text{cm}^{-1}$ ; HRMS (ESI) calcd  $m/z$  for  $\text{C}_{25}\text{H}_{22}\text{N}_4\text{O}_2\text{Rh}^+$  [ $\text{M}-\text{Cl}$ ] $^+$ : 513.0792, found 513.0798.

### 2.8.2 Procedure for the preparation of [5-(4-bromophenyl)-3-methyl-1-morpholino-2,3-dihydro-1*H*-1,2,3-triazol-4-yl]rhodium(I) chloride dicarbonyl (**9x**)

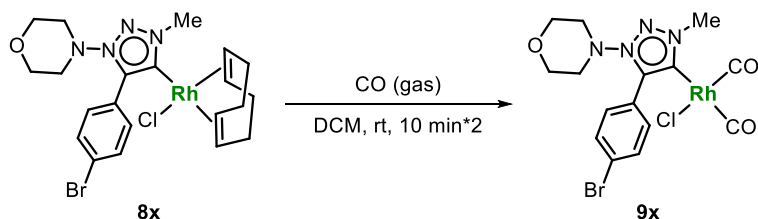

CO was bubbled through a solution of **8x** (82.6 mg, 0.145 mmol, 1.0 equiv.) in DCM (20 mL) for 10 min. The solvent was then removed under reduced pressure, and the residue was dried in high vacuum. Once again the residue was dissolved in DCM (20 mL), and CO was bubbled through the solution for an additional 10 minutes ensuring the reaction completion.

The solvent was then removed until the residual volume of approximately 2 mL, and hexane (80 mL) was added to form a suspension. Filtration of the reaction mixture afforded a light yellow solution. The solvent was then removed under reduced pressure and the residue was dried in high vacuum to afford **9x** in 72% yield (53.7 mg) as a light yellow oil. <sup>1</sup>H NMR (300 MHz, CDCl<sub>3</sub>) δ 7.99-7.96 (m, 2H), 7.66-7.63 (m, 2H), 4.40 (s, 3H), 3.87-3.84 (m, 4H), 3.32-3.29 (m, 4H); <sup>13</sup>C NMR (75 MHz, CDCl<sub>3</sub>) δ 185.5 (d, *J* = 54.3 Hz), 182.9 (d, *J* = 75.1 Hz), 162.9 (d, *J* = 39.7 Hz), 142.2 (d, *J* = 3.1 Hz), 131.8, 131.7, 125.1, 124.8, 66.4, 55.9, 43.6. IR (film): 2957, 2071, 1992, 1456, 1392, 1261, 1158, 1109, 1073, 1009, 912, 826, 564 cm<sup>-1</sup>; HRMS (ESI) calcd *m/z* for C<sub>15</sub>H<sub>15</sub>BrN<sub>4</sub>O<sub>3</sub>Rh<sup>+</sup> [M-Cl]<sup>+</sup>: 480.9377, found 480.9372.

### 3. Stern-Volmer fluorescence quenching studies

Fluorescence quenching experiments were performed on JASCO FP-8500 Fluorescence Spectrometer. The measurements were carried out mixing a 0.05 mM solution of Ru(bpy)<sub>3</sub>(PF<sub>6</sub>)<sub>2</sub> in MeCN (3 mL) with the appropriate amount of quencher in a quartz cuvette equipped with a septum under nitrogen atmosphere. The solvent used was previously degassed with nitrogen for 10 minutes. All solutions were irradiated at λ = 452 nm (absorption maximum of Ru(bpy)<sub>3</sub>(PF<sub>6</sub>)<sub>2</sub>) and the emission intensity at 593 nm was observed (emission maximum). Plots were constructed according to the Stern-Volmer equation and *K<sub>sv</sub>* was calculated<sup>[20]</sup>.

Stern-Volmer equation:

$$\frac{I_0}{I} = 1 + K_{sv}[Q]$$

Increasing amounts of reagent **1a** were added to a solution of Ru(bpy)<sub>3</sub>(PF<sub>6</sub>)<sub>2</sub> in MeCN (0.05 mM). After each addition, an emission spectrum of the solution was recorded. The results in Figure S1 indicate that **1a** quenches emission of [Ru(bpy)<sub>3</sub>]<sup>2+\*</sup>.

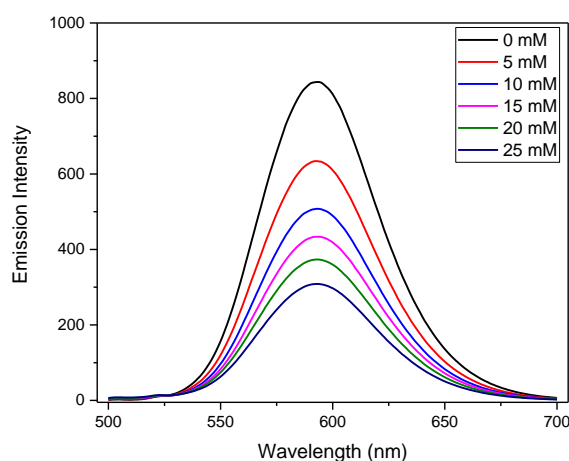



**Figure S1.** Emission spectrum of  $[\text{Ru}(\text{bpy})_3]_2^{+*}$  varying concentration of **1a**.

The Stern-Volmer plot reported in Figure S2 shows a linear correlation between the amounts of **1a** and the ratio  $I_0/I$  with a constant  $K_{SV}$  of  $67.08 \text{ M}^{-1}$ .

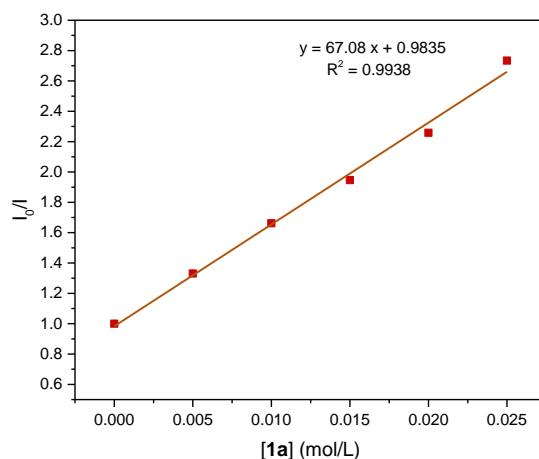

**Figure S2.** Stern-Volmer plot of  $\text{Ru}(\text{bpy})_3(\text{PF}_6)_2$  quenching with varying **1a**.

#### 4. Cyclic voltammetry measurements

Cyclic voltammetry data<sup>[21]</sup> was measured using VersaSTAT 4 Potentiostat Galvanostat electrochemical analyser. All cyclic voltammetry experiments were performed under argon atmosphere. The cell setup consisted of a glassy carbon working electrode, platinum coil counter electrode, and Ag/AgCl reference electrode. All measurements were performed in dry MeCN or DMSO, which had been degassed by bubbling  $\text{N}_2$  for 30 minutes prior to measurements. 0.1 M tetrabutylammonium hexafluorophosphate was used as the supporting electrolyte. Unless otherwise stated, each measurement consisted of an oxidative scan, followed by the reverse reductive scan. Ferrocene was added at the end of the measurements as an internal standard to determine the precise potential scale. Potential values are given versus the saturated calomel electrode (SCE). Irreversible reduction waves were obtained; therefore, the reduction potentials were obtained from the maximum,  $E_{p,\text{max}}$ .

##### *Sulfonium salt 1a:*

The cyclic voltammogram for a solution of **1a** in DMSO [0.1 M  $(\text{n-Bu})_4\text{NPF}_6$ ] is shown in Figure S3. The sweep rate is 500 mV/s. The reduction potential ( $E_{1/2}^{\text{red}}$ ) was normalized to the ferrocene/ferrocenium ( $\text{Fc}/\text{Fc}^+$ ) redox couple and then converted to saturated calomel electrode (SCE) by adding 0.435 V.<sup>[22]</sup> The reduction potential of **1a** was determined to be  $-0.939 \text{ V vs Fc}/\text{Fc}^+$  or  $-0.504 \text{ V vs SCE}$ .

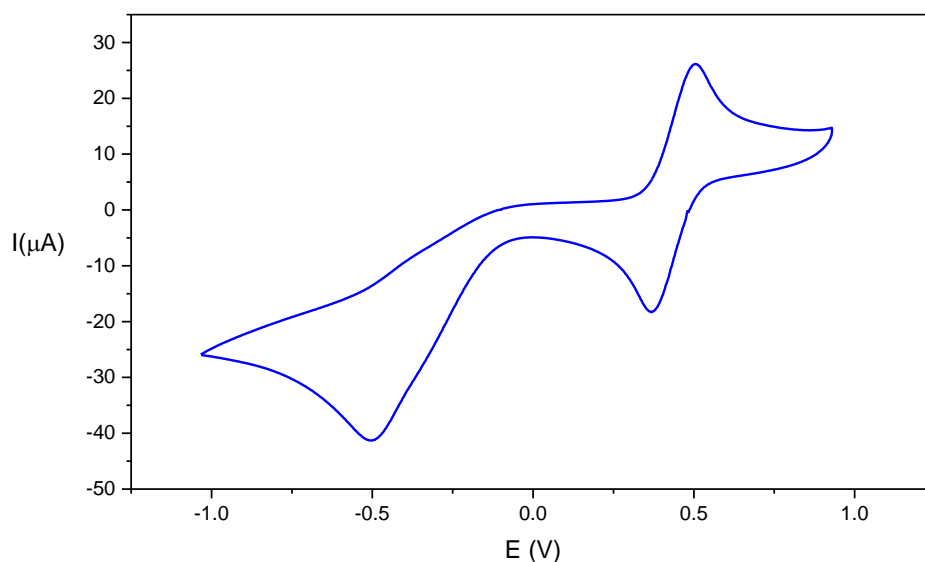

**Figure S3.** Cyclic voltammogram of **1a** with ferrocene as an internal standard

*Sulfonium salt 1e:*

The cyclic voltammogram for a solution of **1e** in CH<sub>3</sub>CN [0.1 M (n-Bu)<sub>4</sub>NPF<sub>6</sub>] is shown in Figure S4. The sweep rate is 200 mV/s. The reduction potential ( $E_{1/2}^{\text{red}}$ ) was normalized to the ferrocene/ferrocenium (Fc/Fc<sup>+</sup>) redox couple and then converted to saturated calomel electrode (SCE) by adding 0.382 V.<sup>[23]</sup> The reduction potential of **1e** was determined to be  $-1.088$  V vs Fc/Fc<sup>+</sup> or  $-0.706$  V vs SCE.

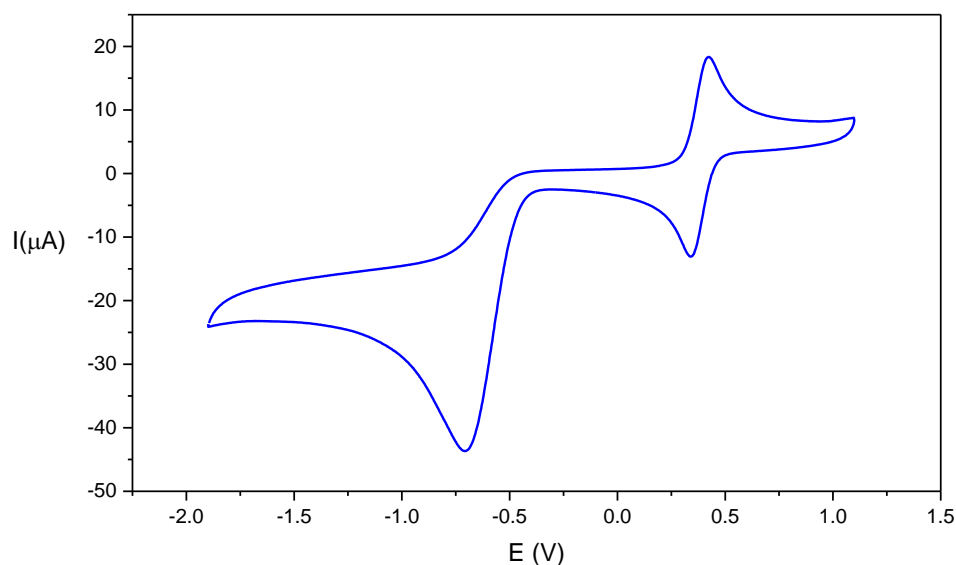

**Figure S4.** Cyclic voltammogram of **1e** with ferrocene as an internal standard

## 5. Quantum yield measurement

### 5.1 Determination of the photon flux

The photon flux of the LED setup was determined using standard ferrioxalate actinometry<sup>[23]</sup>

following a modified literature procedure.<sup>[24]</sup>

*Solutions prepared:*

**0.05 M H<sub>2</sub>SO<sub>4</sub> aqueous solution:**

In a 1L volumetric flask, 2.81 mL of conc. H<sub>2</sub>SO<sub>4</sub> (95% w/w, 17.8 M) was added to 400 mL of deionized water. Then, deionized water was added until the 1L graduation mark was reached.

**0.006 M ferrioxalate solution:**

In a darkened room, potassium ferrioxalate (K<sub>3</sub>FeC<sub>2</sub>O<sub>4</sub>·3H<sub>2</sub>O, 737 mg, 1.5 mmol) was added to a 250 mL volumetric flask. Then, the above 0.05 M H<sub>2</sub>SO<sub>4</sub> aqueous solution was added until the 250 mL graduation mark was reached. The mixture was shaken violently to ensure homogeneity. Then, the solution was covered by aluminum foil and stored in the dark.

**Buffer solution:**

To a 100 mL volumetric flask was added NaOAc (7.30 g, 89.0 mmol) and 50 mL deionized water. Then, 1.0 mL of conc. H<sub>2</sub>SO<sub>4</sub> (95% w/w, 17.8 M) was added dropwise. After this, deionized water was added until the 100 mL graduation mark was reached. The mixture was completely dissolved by using ultrasonic cleaner for 5 minutes.

*Measurements:*

While being careful to minimize exposure to background light, 4.0 mL of the 0.006 M ferrioxalate solution was added to a 10 mL Schlenk tube. The tube was positioned 5 cm from a single PR160L-440 nm Kessil LED lamp ( $\lambda_{\text{max}} = 440 \text{ nm}$ , 25% of the maximum intensity) and irradiated for 10 seconds. Immediately after irradiation, 0.50 mL of the solution was transferred to a foil-covered 10 mL volumetric flask containing 10 mg of 1,10-phenanthroline and 0.50 mL of the buffer solution. Deionized water was then added to the flask to make a total volume of 10 mL. The flask was shaken to ensure efficient mixing and the solution was stored in the dark for approximately one hour. 1.0 mL of the solution was transferred to a quartz cuvette (1.0 cm path length) and the absorbance at  $\lambda = 510 \text{ nm}$  was measured by UV/Vis spectroscopy (Figure S5). A non-irradiated sample and other samples with different irradiation time (20 s, 30 s) were also prepared and the absorbance at 510 nm was measured.

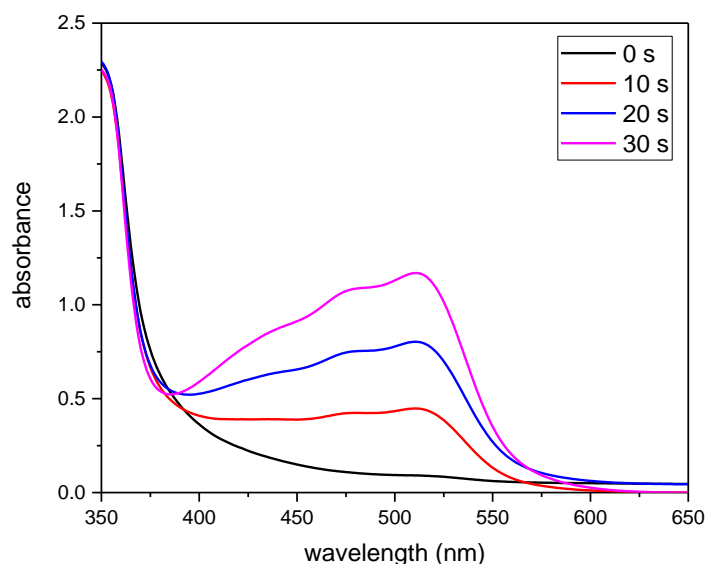

**Figure S5.** Actinometry: UV/Vis spectra of ferrioxalate/1,10-phenanthroline solutions  
The moles of ferrous ions formed in the irradiated volume are given by

$$\text{moles } Fe^{2+} = \frac{V_1 \times V_3 \times \Delta A(510 \text{ nm})}{V_2 \times l \times \varepsilon(510 \text{ nm})}$$

where  $V_1$  is the irradiated volume (4 mL),  $V_2$  is the aliquot of the irradiated solution taken for the determination of the ferrous ions (0.5 mL),  $V_3$  is the final volume after complexation with phenanthroline (10 mL),  $l$  is the optical pathlength of the irradiation cell (1.0 cm),  $\Delta A(510 \text{ nm})$  is the difference in absorbance at  $\lambda = 510 \text{ nm}$  between the irradiated and non-irradiated ferrioxalate/1,10-phenanthroline solutions, and  $\varepsilon(510 \text{ nm})$  is the molar absorptivity of the  $Fe(phen)_3^{2+}$  complex at  $\lambda = 510 \text{ nm}$  ( $11,100 \text{ L}\cdot\text{mol}^{-1}\cdot\text{cm}^{-1}$ ).

The moles of  $Fe^{2+}$  were plotted as a function of time (Figure S6):

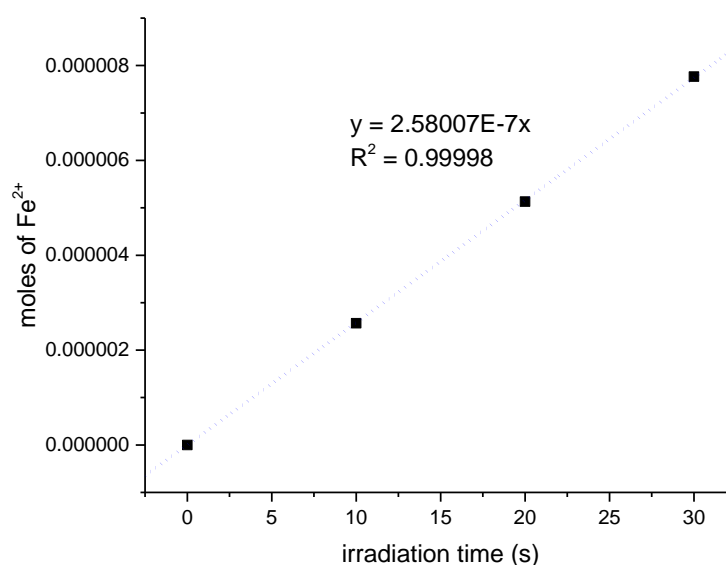

**Figure S6.** Actinometry: Moles of  $Fe^{2+}$  formed vs. irradiation time

The photon flux was then calculated using:

$$\text{photon flux} = \frac{\text{moles Fe}^{2+}}{\Phi t f}$$

where  $\Phi$  is the quantum yield of the ferrioxalate actinometer (approximated as 1.11, which was reported for a 0.006 M solution at  $\lambda = 436$  nm),<sup>[23]</sup>  $t$  is the irradiation time, and  $f$  is the fraction of light absorbed at 440 nm (0.3821).

The fraction of light absorbed was determined by the following equation:

$$f = 1 - 10^{-A}$$

where  $A$  is the measured absorbance (0.2091) of the 0.006 M solution of potassium ferrioxalate at 440 nm.

**Table S8.** Calculation of radiant flux.

| irradiation time (s) | Absorbance ( $A$ ) | $\Delta A$ | moles $\text{Fe}^{2+}$ (mol) | radiant flux (Einstein/s) |
|----------------------|--------------------|------------|------------------------------|---------------------------|
| non-irradiation      | 0.091              | —          | —                            | —                         |
| 10                   | 0.448              | 0.356      | 2.56685E-06                  | 6.052E-07                 |
| 20                   | 0.803              | 0.712      | 5.12959E-06                  | 6.048E-07                 |
| 30                   | 1.169              | 1.077      | 7.76497E-06                  | 6.103E-07                 |

The average radiant flux is  $6.07 \times 10^{-7}$  Einstein/s.

## 5.2 Determination of the quantum yield

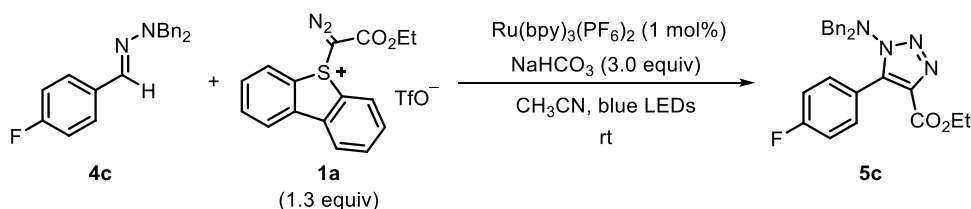

To a 10 mL oven-dried Schlenk tube equipped with a stirring bar was added  $\text{Ru(bpy)}_3\text{(PF}_6)_2$  (1.7 mg, 0.002 mmol, 1 mol%),  $\text{NaHCO}_3$  (50.4 mg, 0.6 mmol, 3.0 equiv), **1a** (116.1 mg, 0.26 mmol, 1.3 equiv) and **4c** (63.7 mg, 0.2 mmol, 1.0 equiv). The Schlenk tube was then evacuated and backfilled with  $\text{N}_2$  three times after which  $\text{CH}_2\text{Br}_2$  (0.2 mmol, 14.0  $\mu\text{L}$ , 1.0 equiv) and acetonitrile (4 mL) were added under  $\text{N}_2$ . The tube was positioned 5 cm from a single PR160L-440 nm Kessil LED lamp ( $\lambda_{\text{max}} = 440$  nm, 25% of the maximum intensity). The reaction was stirred at 500 rpm and approximate 0.1 mL reaction mixture was taken by a syringe every 5 minutes, which was diluted with  $\text{CDCl}_3$ , and comparison of the integration of the internal standard  $\text{CH}_2\text{Br}_2$  (4.97 ppm, s, 2H) with that of the formed product (4.20 ppm, q,  $J = 7.1$  Hz, 2H) revealed yields of **5c**.

The quantum yield ( $\Phi$ ) was then calculated using:

$$\Phi = \frac{\text{moles of product}}{\text{photon flux} \cdot t \cdot f}$$

where flux is the photon flux determined by ferrioxalate actinometry ( $6.07 \times 10^{-7}$  Einstein/s),  $t$  is the time, and  $f$  is the fraction of light absorbed by Ru(bpy)<sub>3</sub>(PF<sub>6</sub>)<sub>2</sub> at 440 nm.

A  $1.0 \times 10^{-4}$  M solution of Ru(bpy)<sub>3</sub>(PF<sub>6</sub>)<sub>2</sub> in acetonitrile was prepared, and the absorbance of the solution at 440 nm was 2.168. The fraction of light absorbed at 440 nm was calculated:

$$f = 1 - 10^{-A} = 0.9932$$

**Table S9.** Calculation of quantum yield.

| reaction time (s) | yield (%) | moles of product (mol) | quantum yield $\Phi$ |
|-------------------|-----------|------------------------|----------------------|
| 300               | 17        | 3.40E-05               | 0.188                |
| 600               | 32        | 6.40E-05               | 0.177                |
| 900               | 47        | 9.40E-05               | 0.173                |
| 1200              | 68        | 1.36E-04               | 0.188                |
| 1500              | 88        | 1.76E-04               | 0.195                |

The average quantum yield is 0.18.

## 6. Light on/off experiment

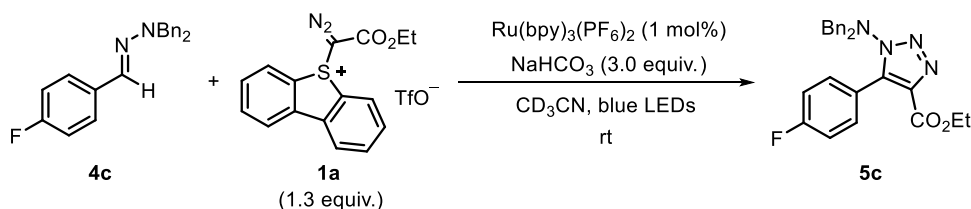

To a 10 mL oven-dried Schlenk tube equipped with a stirring bar was added Ru(bpy)<sub>3</sub>(PF<sub>6</sub>)<sub>2</sub> (1.7 mg, 0.002 mmol, 1 mol%), NaHCO<sub>3</sub> (50.4 mg, 0.6 mmol, 3.0 equiv.), **1a** (116.1 mg, 0.26 mmol, 1.3 equiv.) and **4c** (63.7 mg, 0.2 mmol, 1.0 equiv.). The Schlenk tube was then evacuated and backfilled with N<sub>2</sub> three times after which CH<sub>2</sub>Br<sub>2</sub> (0.2 mmol, 14.0  $\mu$ L, 1.0 equiv.) and CD<sub>3</sub>CN (4 mL) were added under N<sub>2</sub>. Then, the reaction tube was placed in a photoreactor equipped with blue LED strips (wavelength range: 430-435 nm, 12 W). A mini-fan was kept on top to maintain room temperature. The reaction mixture was stirred at room temperature, and the light was turned on and off every 15 minutes. During each on/off shift, approximate 0.4 mL reaction mixture was taken by a syringe, which was directly transferred into an NMR tube over a syringe filter (additional CD<sub>3</sub>CN was added if it is necessary). Comparison of the integration of the internal standard CH<sub>2</sub>Br<sub>2</sub> (5.09 ppm, s, 2H) with that of the formed product (4.12 ppm,

q,  $J = 7.1$  Hz, 2H) revealed yields of **5c** (Figure S7).

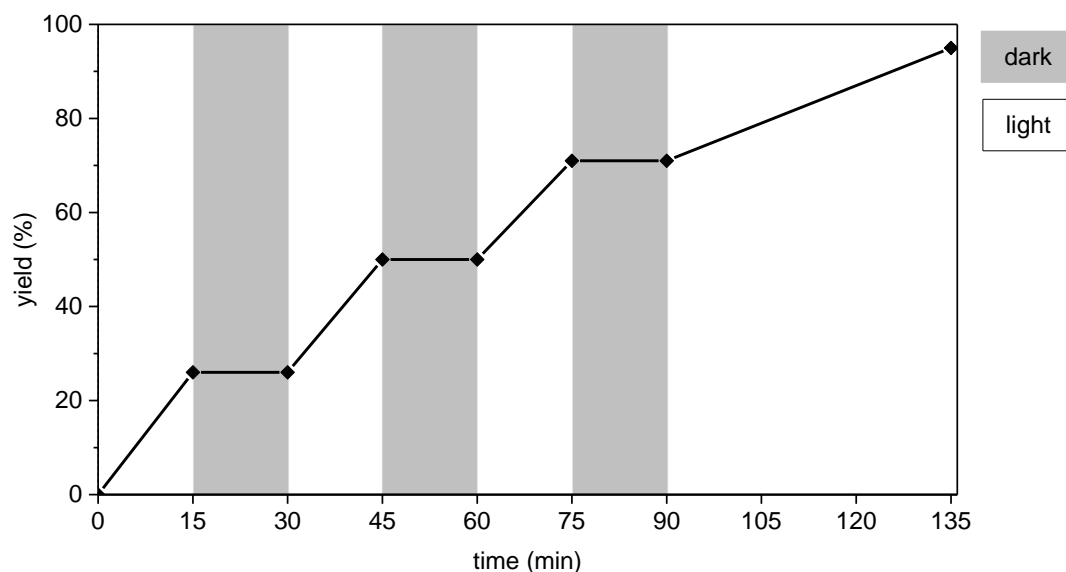

**Figure S7.** Time profile of the reaction with and without light

The light on/off experiment verified the necessity of continuous irradiation of visible light, which suggested that chain propagation might not be involved in the mechanistic pathway.

## 7. Other control experiments

### 7.1 Photoredox-catalyzed C-H diazomethylation of arenes

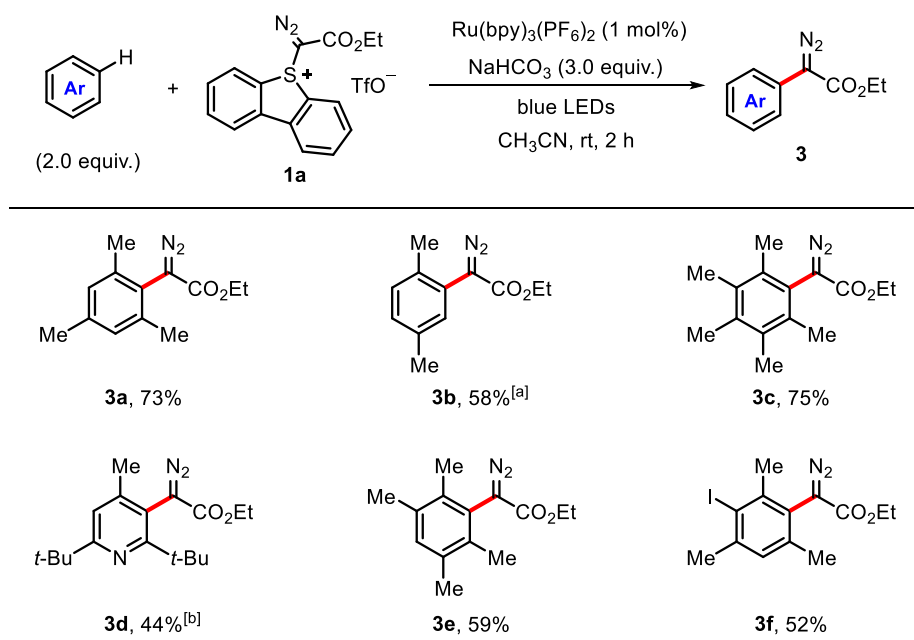

[a] 10 equiv. *p*-xylene was used. [b] 3 equiv. 2,6-di-*tert*-butyl-4-methylpyridine was used.

Typical procedure for the photoredox catalyzed C-H diazomethylation of arenes: To a 10 mL oven-dried Schlenk tube equipped with a stirring bar was added Ru(bpy)<sub>3</sub>(PF<sub>6</sub>)<sub>2</sub> (1.7 mg,

0.002 mmol, 1 mol%), NaHCO<sub>3</sub> (50.4 mg, 0.6 mmol, 3.0 equiv.) and **1a** (89.3 mg, 0.2 mmol, 1.0 equiv.). The Schlenk tube was then evacuated and backfilled with N<sub>2</sub> three times after which CH<sub>3</sub>CN (2 mL) and arenes (0.4 mmol, 2.0 equiv.) were added under N<sub>2</sub>. After that, the reaction mixture was placed in a photoreactor equipped with blue LED strips (wavelength range: 430-435 nm, 9 W). A mini-fan was kept on top to maintain room temperature. Two hours later, the reaction mixture was passed through a short pad of celite and eluted with dichloromethane. The combined solvents were removed under reduced pressure and the residue was purified by column chromatography on silica gel to afford **3**.

### 7.1.1 Synthesis and characterization of ethyl 2-diazo-2-mesitylacetate (**3a**)

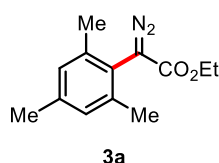

A mixture of Ru(bpy)<sub>3</sub>(PF<sub>6</sub>)<sub>2</sub> (1.7 mg, 0.002 mmol, 1 mol%), NaHCO<sub>3</sub> (50.4 mg, 0.6 mmol, 3.0 equiv.), **1a** (89.3 mg, 0.2 mmol, 1.0 equiv.) and mesitylene (55.6 μL, 0.4 mmol, 2.0 equiv.) in CH<sub>3</sub>CN (2 mL) was stirred at room temperature with blue light for 2 h. Column chromatography on silica gel (eluent: hexane to hexane/ethyl acetate = 20:1) afforded **3a** in 73% yield (33.8 mg) as a yellowish oil. <sup>1</sup>H NMR (300 MHz, CDCl<sub>3</sub>) δ 6.87 (s, 2H), 4.19 (q, *J* = 7.2 Hz, 2H), 2.22 (s, 3H), 2.21 (s, 6H), 1.21 (t, *J* = 7.2 Hz, 3H). The spectroscopic data are in agreement with those previously reported.<sup>[25]</sup>

### 7.1.2 Synthesis and characterization of ethyl 2-diazo-2-(2,5-dimethylphenyl)acetate (**3b**)

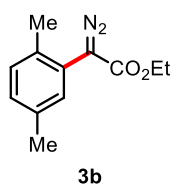

A mixture of Ru(bpy)<sub>3</sub>(PF<sub>6</sub>)<sub>2</sub> (1.7 mg, 0.002 mmol, 1 mol%), NaHCO<sub>3</sub> (50.4 mg, 0.6 mmol, 3.0 equiv.), **1a** (89.3 mg, 0.2 mmol, 1.0 equiv.) and *p*-xylene (247 μL, 2.0 mmol, 10.0 equiv.) in CH<sub>3</sub>CN (2 mL) was stirred at room temperature with blue light for 2 h. Column chromatography on silica gel (eluent: hexane to hexane/ethyl acetate = 20:1) afforded **3b** in 58% yield (25.4 mg) as a yellowish oil. <sup>1</sup>H NMR (400 MHz, CDCl<sub>3</sub>) δ 7.20 (s, 1H), 7.15-7.13 (m, 1H), 7.08-7.06 (m, 1H), 4.29 (q, *J* = 7.2 Hz, 2H), 2.32 (s, 3H), 2.26 (s, 3H), 1.31 (t, *J* = 7.1 Hz, 3H). The spectroscopic data are in agreement with those previously reported.<sup>[25]</sup>



### 7.1.3 Synthesis and characterization of ethyl 2-diazo-2-(2,3,4,5,6-pentamethylphenyl)acetate (**3c**)

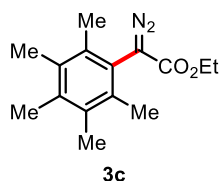

A mixture of Ru(bpy)<sub>3</sub>(PF<sub>6</sub>)<sub>2</sub> (1.7 mg, 0.002 mmol, 1 mol%), NaHCO<sub>3</sub> (50.4 mg, 0.6 mmol, 3.0 equiv.), **1a** (89.3 mg, 0.2 mmol, 1.0 equiv.) and 1,2,3,4,5-pentamethylbenzene (59.3 mg, 0.4 mmol, 2.0 equiv.) in CH<sub>3</sub>CN (2 mL) was stirred at room temperature with blue light for 2 h. Column chromatography on silica gel (eluent: hexane to hexane/ethyl acetate = 20:1) afforded **3c** in 75% yield (39.3 mg) as a yellowish oil. <sup>1</sup>H NMR (300 MHz, CDCl<sub>3</sub>) δ 4.27 (q, *J* = 7.1 Hz, 2H), 2.27 (s, 6H), 2.25 (s, 3H), 2.23 (s, 6H), 1.28 (t, *J* = 7.1 Hz, 3H); <sup>13</sup>C NMR (100 MHz, CDCl<sub>3</sub>) δ 167.0 (br), 137.3, 135.2, 133.3, 121.9, 61.0, 18.1, 17.1, 17.0, 14.8. IR (neat): 2971, 2927, 2079, 1820, 1738, 1698, 1682, 1445, 1366, 1335, 1277, 1257, 1205, 1171, 1108, 1067, 1018, 927, 827, 739, 708, 614, 538, 514, 470, 419 cm<sup>-1</sup>; HRMS (ESI) calcd *m/z* for C<sub>15</sub>H<sub>20</sub>N<sub>2</sub>O<sub>2</sub>Na<sup>+</sup> [M+Na]<sup>+</sup>: 283.1417, found 283.1422.

### 7.1.4 Synthesis and characterization of ethyl 2-(2,6-di-*tert*-butyl-4-methylpyridin-3-yl)-2-diazoacetate (**3d**)

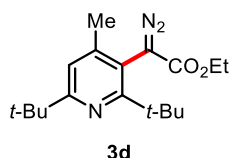

A mixture of Ru(bpy)<sub>3</sub>(PF<sub>6</sub>)<sub>2</sub> (1.7 mg, 0.002 mmol, 1 mol%), NaHCO<sub>3</sub> (50.4 mg, 0.6 mmol, 3.0 equiv.), **1a** (89.3 mg, 0.2 mmol, 1.0 equiv.) and 2,6-di-*tert*-butyl-4-methylpyridine (123.2 mg, 0.6 mmol, 3.0 equiv.) in CH<sub>3</sub>CN (2 mL) was stirred at room temperature with blue light for 2 h. Column chromatography on silica gel (eluent: hexane to hexane/ethyl acetate = 20:1) afforded **3d** in 44% yield (28.1 mg) as a light yellow oil. <sup>1</sup>H NMR (300 MHz, CDCl<sub>3</sub>) δ 7.07 (s, 1H), 4.31-4.24 (m, 2H), 2.28 (s, 3H), 1.41 (s, 9H), 1.33 (s, 9H), 1.31-1.25 (m, 3H). The spectroscopic data are in agreement with those previously reported.<sup>[25]</sup>

### 7.1.5 Synthesis and characterization of ethyl 2-diazo-2-(2,3,5,6-tetramethylphenyl)acetate (3e)

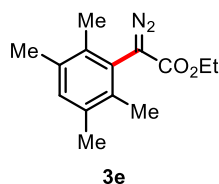

A mixture of Ru(bpy)<sub>3</sub>(PF<sub>6</sub>)<sub>2</sub> (1.7 mg, 0.002 mmol, 1 mol%), NaHCO<sub>3</sub> (50.4 mg, 0.6 mmol, 3.0 equiv.), **1a** (89.3 mg, 0.2 mmol, 1.0 equiv.) and 1,2,4,5-tetramethylbenzene (53.7 mg, 0.4 mmol, 2.0 equiv.) in CH<sub>3</sub>CN (2 mL) was stirred at room temperature with blue light for 2 h. Column chromatography on silica gel (eluent: hexane to hexane/ethyl acetate = 20:1) afforded **3e** in 59% yield (29.1 mg) as a yellowish oil. <sup>1</sup>H NMR (300 MHz, CDCl<sub>3</sub>) δ 7.03 (s, 1H), 4.27 (q, *J* = 7.1 Hz, 2H), 2.25 (s, 6H), 2.21 (s, 6H), 1.29 (t, *J* = 7.1 Hz, 3H); <sup>13</sup>C NMR (100 MHz, CDCl<sub>3</sub>) δ 166.7 (br), 135.7, 134.4, 133.2, 124.2, 61.1, 20.4, 16.9, 14.7. IR (neat): 2971, 2921, 2868, 2078, 1698, 1682, 1603, 1465, 1445, 1409, 1384, 1365, 1333, 1263, 1200, 1170, 1106, 1020, 977, 873, 803, 757, 741, 722, 581, 531, 519, 462, 431, 420 cm<sup>-1</sup>; HRMS (ESI) calcd *m/z* for C<sub>14</sub>H<sub>19</sub>N<sub>2</sub>O<sub>2</sub><sup>+</sup> [M+H]<sup>+</sup>: 247.1441, found 247.1438.

### 7.1.6 Synthesis and characterization of ethyl 2-diazo-2-(3-iodo-2,4,6-trimethylphenyl)acetate (3f)

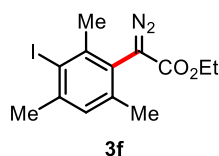

A mixture of Ru(bpy)<sub>3</sub>(PF<sub>6</sub>)<sub>2</sub> (1.7 mg, 0.002 mmol, 1 mol%), NaHCO<sub>3</sub> (50.4 mg, 0.6 mmol, 3.0 equiv.), **1a** (89.3 mg, 0.2 mmol, 1.0 equiv.) and 2-iodo-1,3,5-trimethylbenzene (98.4 mg, 0.4 mmol, 2.0 equiv.) in CH<sub>3</sub>CN (2 mL) was stirred at room temperature with blue light for 2 h. Column chromatography on silica gel (eluent: hexane to hexane/ethyl acetate = 20:1) afforded **3f** in 52% yield (37.2 mg) as a yellowish oil. <sup>1</sup>H NMR (300 MHz, CDCl<sub>3</sub>) δ 7.05 (s, 1H), 4.27 (q, *J* = 7.1 Hz, 2H), 2.54 (s, 3H), 2.46 (s, 3H), 2.26 (s, 3H), 1.28 (t, *J* = 7.1 Hz, 3H); <sup>13</sup>C NMR (100 MHz, CDCl<sub>3</sub>) δ 166.1 (br), 144.1, 143.2, 139.6, 129.3, 121.8, 106.2, 61.3, 30.2, 28.0, 20.0, 14.7. IR (neat): 2977, 2920, 2081, 1823, 1685, 1444, 1366, 1323, 1262, 1214, 1169, 1139, 1093, 1036, 1024, 954, 862, 822, 764, 744, 641, 604, 586, 546, 526, 470, 418 cm<sup>-1</sup>; HRMS (ESI) calcd *m/z* for C<sub>13</sub>H<sub>16</sub>N<sub>2</sub>O<sub>2</sub>I<sup>+</sup> [M+H]<sup>+</sup>: 359.0251, found 359.0249.

## 7.2 Stoichiometric reaction

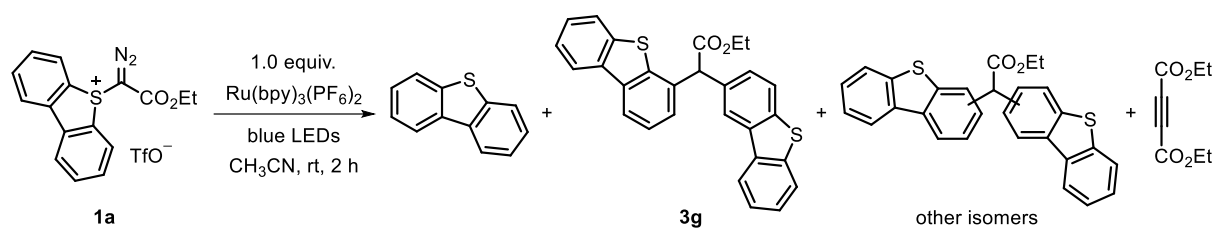

To a 3 mL oven-dried Schlenk tube equipped with a stirring bar was added Ru(bpy)<sub>3</sub>(PF<sub>6</sub>)<sub>2</sub> (43.0 mg, 0.05 mmol, 1.0 equiv.) and **1a** (22.3 mg, 0.05 mmol, 1.0 equiv.). The Schlenk tube was then evacuated and backfilled with N<sub>2</sub> three times after which CH<sub>3</sub>CN (0.5 mL) was added under N<sub>2</sub>. After that, the reaction mixture was placed in a photoreactor equipped with blue LED strips (wavelength range: 430-435 nm, 9 W). A mini-fan was kept on top to maintain room temperature. After two hours, the reaction mixture was passed through a short pad of celite and eluted with dichloromethane. The solvent was then removed under reduced pressure and the residue was purified by column chromatography on silica gel (eluent: hexane to hexane/ethyl acetate = 20:1) to afford dibenzo[*b,d*]thiophene (4.8 mg, 52% yield) as a white solid and a colorless mixture (3.0 mg). The mixture was further subjected to preparative HPLC, affording **3g** (1.2 mg, 11% yield) as a colorless oil and other isomers. Diethyl but-2-ynedioate was observed in trace amount. Characterization of **3g**: <sup>1</sup>H NMR (300 MHz, CDCl<sub>3</sub>) δ 8.35-8.33 (m, 1H), 8.08-8.04 (m, 2H), 7.91-7.82 (m, 4H), 7.47-7.39 (m, 6H), 7.30-7.27 (m, 1H), 6.29 (s, 1H), 4.39-4.21 (m, 2H), 1.28 (t, *J* = 7.1 Hz, 3H); <sup>13</sup>C NMR (100 MHz, CDCl<sub>3</sub>) δ 172.7, 140.7, 140.1, 140.0, 138.9, 136.3, 135.4, 135.3, 135.2, 134.2, 133.6, 127.9, 127.1, 126.4, 126.3, 126.2, 125.0, 124.6, 124.5, 123.4, 123.2, 123.0, 122.4, 122.2, 121.9, 61.8, 55.0, 14.4. IR (film): 3060, 2979, 1734, 1562, 1469, 1440, 1366, 1294, 1231, 1179, 1158, 1081, 1025, 907, 764, 732, 620, 507, 496, 483, 469, 443, 431, 419 cm<sup>-1</sup>; HRMS calculated *m/z* for C<sub>28</sub>H<sub>21</sub>O<sub>2</sub>S<sub>2</sub><sup>+</sup> [M+H]: 453.0977, found (ESI) 453.0961.

## 8. Differential scanning calorimetry (DSC) of sulfonium salts 1

Experimental method of the DSC analysis of sulfonium salts: from 25 °C to 500 °C, 15 °C/min, air as the working gas.

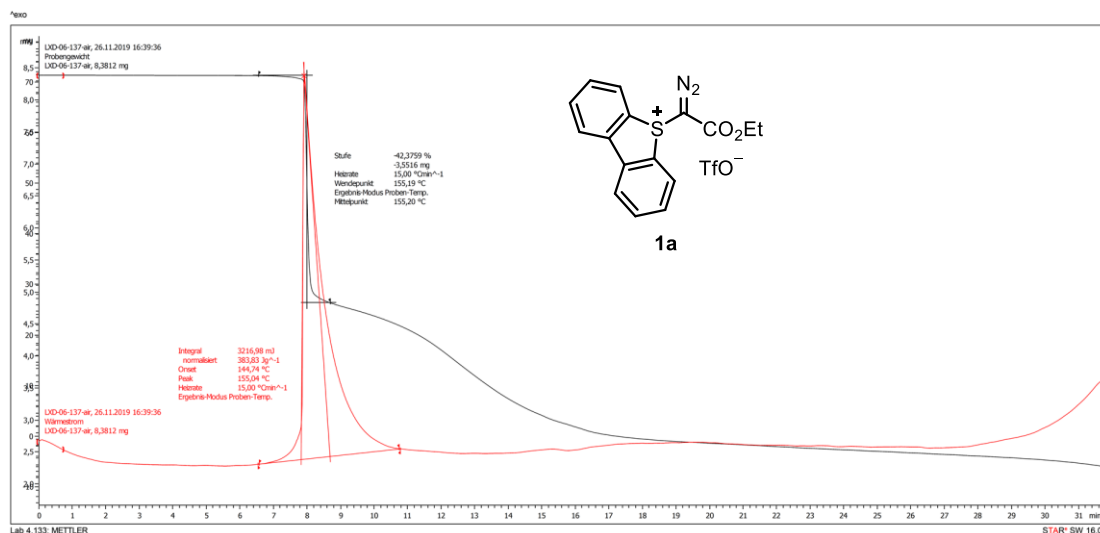

Figure S8. DSC measurement curve for **1a**.

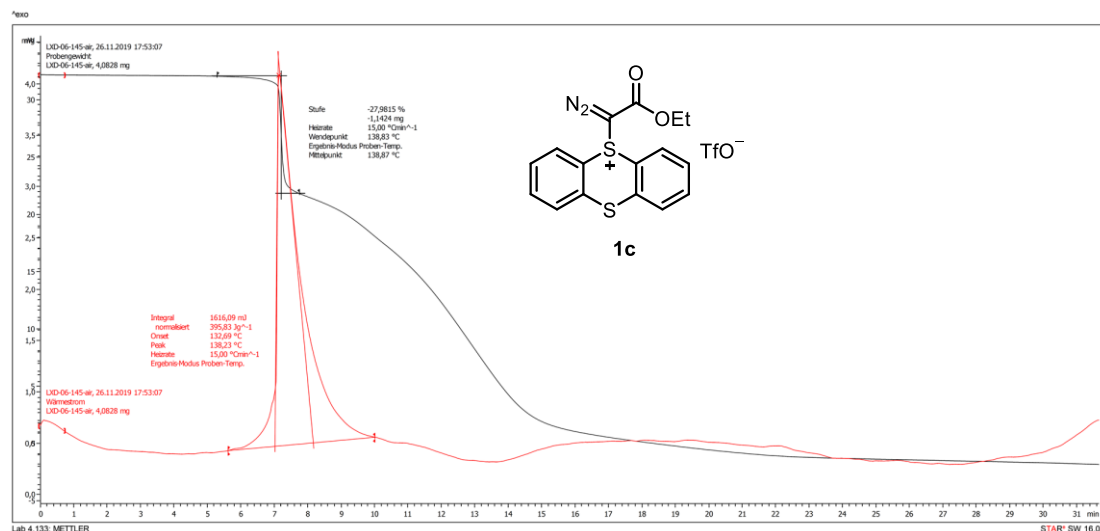

Figure S9. DSC measurement curve for **1c**.

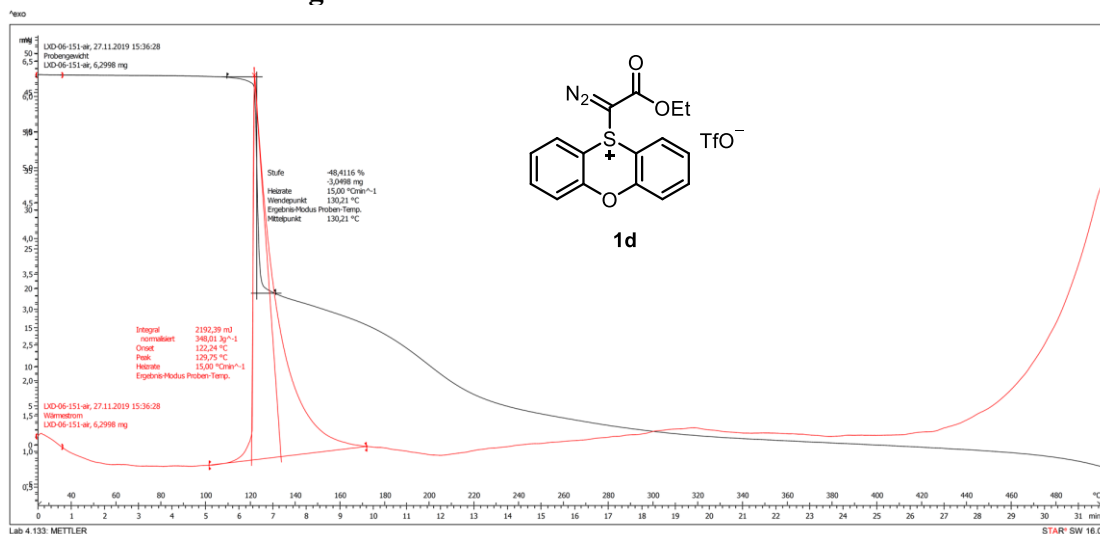

Figure S10. DSC measurement curve for **1d**.

## 9. Single crystal X-ray diffraction analysis

### 9.1 General remarks

Data collection was done on two dual source equipped Bruker D8 Venture four-circle-diffractometer from Bruker AXS GmbH; used X-ray sources: microfocus I $\mu$ S 2.0 Cu/Mo and microfocus I $\mu$ S 3.0 Ag/Mo from Incoatec GmbH with mirror optics HELIOS and single-hole collimator from Bruker AXS GmbH; used detector: Photon III CE14 (Cu/Mo) and Photon III HE (Ag/Mo) from Bruker AXS GmbH.

Used programs: APEX3 Suite (v2018.7-2) for data collection and therein integrated programs SAINT V8.38A (Integration) und SADABS 2016/2 (Absorption correction) from Bruker AXS GmbH; structure solution was done with SHELXT, refinement with SHELXL-2018/3;<sup>[26]</sup> OLEX2 was used for data finalization.<sup>[27]</sup>

Special Utilities: SMZ1270 stereomicroscope from Nikon Metrology GmbH was used for sample preparation; crystals were mounted on MicroMounts or MicroLoops from MiTeGen in NVH oil; for sensitive samples the X-TEMP 2 System was used for picking of crystals;<sup>[28]</sup> crystals were cooled to given temperature with Cryostream 800 from Oxford Cryosystems.

| Compound Identifier | CCDC number |
|---------------------|-------------|
| <b>1a</b>           | 2009414     |
| <b>1b</b>           | 2041657     |
| <b>1c</b>           | 2009416     |
| <b>1d</b>           | 2009417     |
| <b>5i</b>           | 2041658     |
| <b>5s</b>           | 2041659     |
| <b>5y</b>           | 2041660     |
| <b>5ab</b>          | 2009418     |
| <b>7w</b>           | 2041661     |
| <b>7x</b>           | 2041662     |
| <b>8w</b>           | 2041663     |
| <b>8x</b>           | 2041664     |

## 9.2 Crystal data and structure refinement for 1a

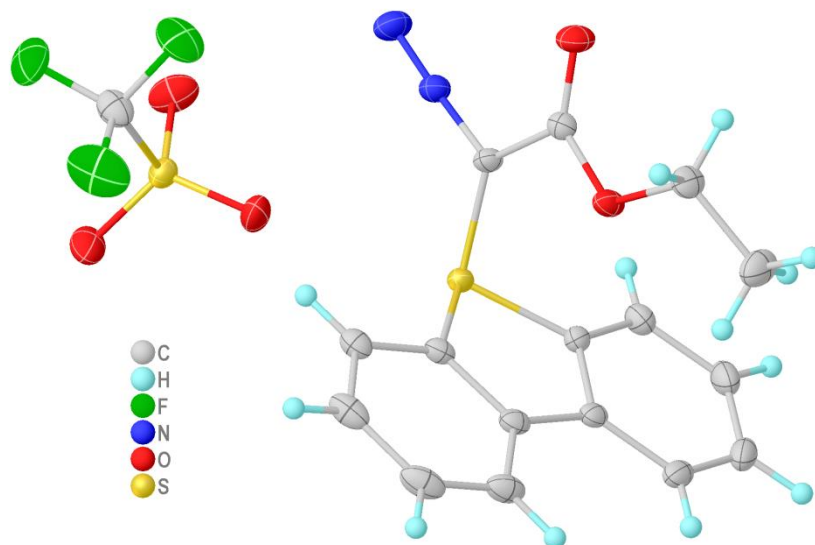

|                                               |                                                               |
|-----------------------------------------------|---------------------------------------------------------------|
| Empirical formula                             | $C_{17}H_{13}F_3N_2O_5S_2$                                    |
| Formula weight                                | 446.41                                                        |
| Temperature/K                                 | 100.0                                                         |
| Crystal system                                | triclinic                                                     |
| Space group                                   | P-1                                                           |
| $a/\text{\AA}$                                | 8.8866(8)                                                     |
| $b/\text{\AA}$                                | 10.5241(8)                                                    |
| $c/\text{\AA}$                                | 11.8134(10)                                                   |
| $\alpha/^\circ$                               | 110.309(3)                                                    |
| $\beta/^\circ$                                | 108.409(3)                                                    |
| $\gamma/^\circ$                               | 101.173(3)                                                    |
| Volume/ $\text{\AA}^3$                        | 924.22(14)                                                    |
| Z                                             | 2                                                             |
| $\rho_{\text{calc}}/\text{cm}^3$              | 1.604                                                         |
| $\mu/\text{mm}^{-1}$                          | 0.351                                                         |
| F(000)                                        | 456.0                                                         |
| Crystal size/ $\text{mm}^3$                   | $0.308 \times 0.181 \times 0.07$                              |
| Radiation                                     | MoK $\alpha$ ( $\lambda = 0.71073$ )                          |
| $2\Theta$ range for data collection/ $^\circ$ | 4.39 to 61.086                                                |
| Index ranges                                  | $-12 \leq h \leq 12, -14 \leq k \leq 15, -16 \leq l \leq 15$  |
| Reflections collected                         | 38735                                                         |
| Independent reflections                       | 5371 [ $R_{\text{int}} = 0.0279, R_{\text{sigma}} = 0.0189$ ] |
| Data/restraints/parameters                    | 5371/0/264                                                    |
| Goodness-of-fit on $F^2$                      | 1.056                                                         |
| Final R indexes [ $I \geq 2\sigma(I)$ ]       | $R_1 = 0.0324, wR_2 = 0.0799$                                 |
| Final R indexes [all data]                    | $R_1 = 0.0386, wR_2 = 0.0843$                                 |
| Largest diff. peak/hole / $e \text{\AA}^{-3}$ | 0.56/-0.39                                                    |

### 9.3 Crystal data and structure refinement for 1b

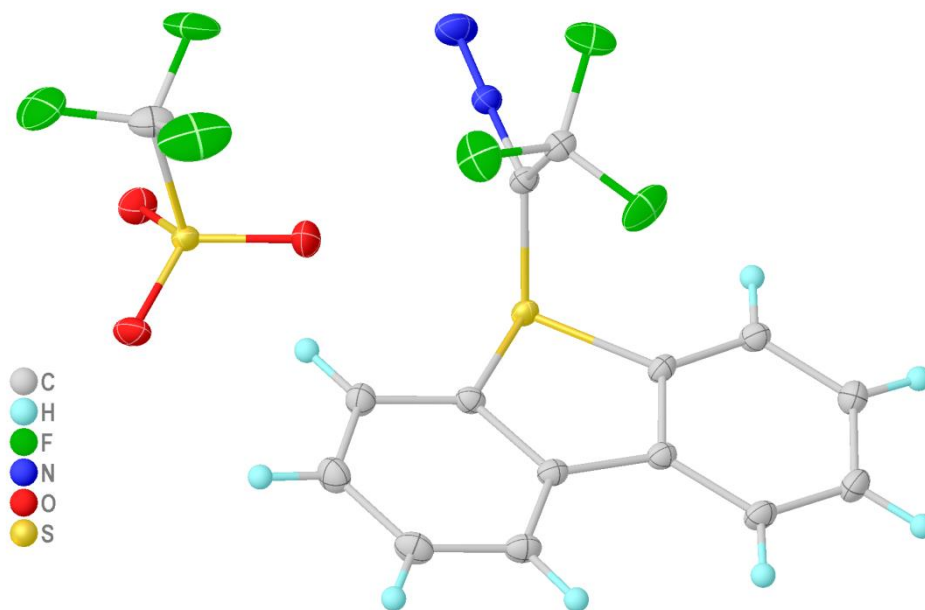

|                                               |                                                               |
|-----------------------------------------------|---------------------------------------------------------------|
| Empirical formula                             | $C_{15}H_8F_6N_2O_3S_2$                                       |
| Formula weight                                | 442.35                                                        |
| Temperature/K                                 | 100.0                                                         |
| Crystal system                                | triclinic                                                     |
| Space group                                   | P-1                                                           |
| $a/\text{\AA}$                                | 7.6962(8)                                                     |
| $b/\text{\AA}$                                | 10.7945(12)                                                   |
| $c/\text{\AA}$                                | 11.2457(11)                                                   |
| $\alpha/^\circ$                               | 64.258(4)                                                     |
| $\beta/^\circ$                                | 85.031(5)                                                     |
| $\gamma/^\circ$                               | 81.268(5)                                                     |
| Volume/ $\text{\AA}^3$                        | 831.56(15)                                                    |
| Z                                             | 2                                                             |
| $\rho_{\text{calc}}/\text{g cm}^{-3}$         | 1.767                                                         |
| $\mu/\text{mm}^{-1}$                          | 0.406                                                         |
| F(000)                                        | 444.0                                                         |
| Crystal size/ $\text{mm}^3$                   | $0.328 \times 0.313 \times 0.19$                              |
| Radiation                                     | MoK $\alpha$ ( $\lambda = 0.71073$ )                          |
| $2\theta$ range for data collection/ $^\circ$ | 4.224 to 57.418                                               |
| Index ranges                                  | $-10 \leq h \leq 10, -14 \leq k \leq 14, -15 \leq l \leq 15$  |
| Reflections collected                         | 21188                                                         |
| Independent reflections                       | 4285 [ $R_{\text{int}} = 0.0202, R_{\text{sigma}} = 0.0178$ ] |
| Data/restraints/parameters                    | 4285/0/253                                                    |
| Goodness-of-fit on $F^2$                      | 1.043                                                         |
| Final R indexes [ $I \geq 2\sigma(I)$ ]       | $R_1 = 0.0249, wR_2 = 0.0656$                                 |
| Final R indexes [all data]                    | $R_1 = 0.0254, wR_2 = 0.0660$                                 |
| Largest diff. peak/hole / $e \text{\AA}^{-3}$ | 0.44/-0.37                                                    |

## 9.4 Crystal data and structure refinement for 1c

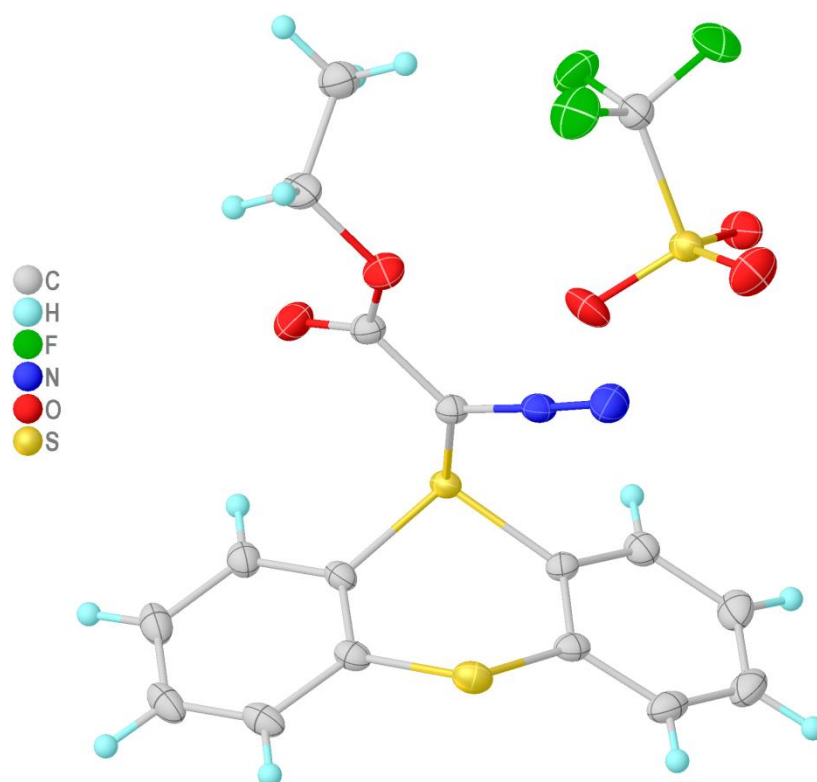

|                                                |                                                                  |
|------------------------------------------------|------------------------------------------------------------------|
| Empirical formula                              | $C_{17}H_{13}F_3N_2O_5S_3$                                       |
| Formula weight                                 | 478.47                                                           |
| Temperature/K                                  | 100.0                                                            |
| Crystal system                                 | triclinic                                                        |
| Space group                                    | P-1                                                              |
| a/Å                                            | 9.3754(9)                                                        |
| b/Å                                            | 10.0246(10)                                                      |
| c/Å                                            | 11.2424(11)                                                      |
| $\alpha/^\circ$                                | 102.665(3)                                                       |
| $\beta/^\circ$                                 | 107.668(3)                                                       |
| $\gamma/^\circ$                                | 91.868(3)                                                        |
| Volume/Å <sup>3</sup>                          | 976.68(17)                                                       |
| Z                                              | 2                                                                |
| $\rho_{\text{calc}}/\text{cm}^3$               | 1.627                                                            |
| $\mu/\text{mm}^{-1}$                           | 0.441                                                            |
| F(000)                                         | 488.0                                                            |
| Crystal size/mm <sup>3</sup>                   | 0.204 × 0.187 × 0.122                                            |
| Radiation                                      | MoK $\alpha$ ( $\lambda = 0.71073$ )                             |
| 2 $\theta$ range for data collection/ $^\circ$ | 3.918 to 61.084                                                  |
| Index ranges                                   | -13 ≤ h ≤ 13, -14 ≤ k ≤ 14, -16 ≤ l ≤ 15                         |
| Reflections collected                          | 56639                                                            |
| Independent reflections                        | 5924 [ $R_{\text{int}} = 0.0255$ , $R_{\text{sigma}} = 0.0144$ ] |
| Data/restraints/parameters                     | 5924/0/272                                                       |



|                                                |                                  |
|------------------------------------------------|----------------------------------|
| Goodness-of-fit on $F^2$                       | 1.034                            |
| Final R indexes [ $I \geq 2\sigma(I)$ ]        | $R_1 = 0.0290$ , $wR_2 = 0.0787$ |
| Final R indexes [all data]                     | $R_1 = 0.0327$ , $wR_2 = 0.0817$ |
| Largest diff. peak/hole / $e \text{ \AA}^{-3}$ | 0.47/-0.41                       |

## 9.5 Crystal data and structure refinement for 1d

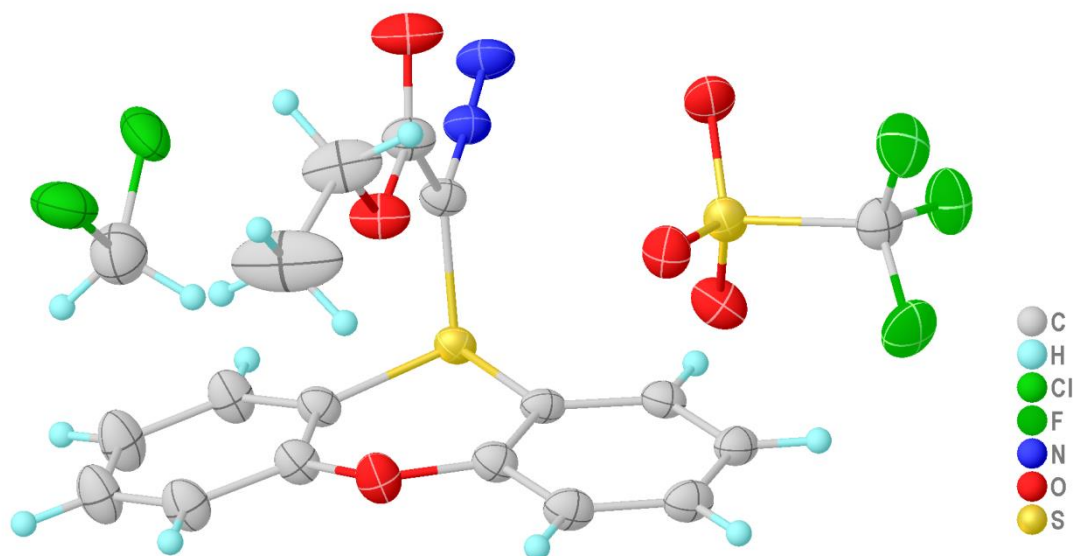

|                                               |                                                                    |
|-----------------------------------------------|--------------------------------------------------------------------|
| Empirical formula                             | $C_{17.04}H_{13.07}Cl_{0.07}F_3N_2O_6S_2^*$                        |
| Formula weight                                | 465.51                                                             |
| Temperature/K                                 | 100.0                                                              |
| Crystal system                                | monoclinic                                                         |
| Space group                                   | $P2_1/n$                                                           |
| $a/\text{\AA}$                                | 10.3106(18)                                                        |
| $b/\text{\AA}$                                | 15.392(2)                                                          |
| $c/\text{\AA}$                                | 13.213(2)                                                          |
| $\alpha/^\circ$                               | 90                                                                 |
| $\beta/^\circ$                                | 106.098(5)                                                         |
| $\gamma/^\circ$                               | 90                                                                 |
| Volume/ $\text{\AA}^3$                        | 2014.6(6)                                                          |
| Z                                             | 4                                                                  |
| $\rho_{\text{calc}}/\text{cm}^3$              | 1.535                                                              |
| $\mu/\text{mm}^{-1}$                          | 0.339                                                              |
| F(000)                                        | 950.0                                                              |
| Crystal size/ $\text{mm}^3$                   | $0.598 \times 0.043 \times 0.04$                                   |
| Radiation                                     | MoK $\alpha$ ( $\lambda = 0.71073$ )                               |
| $2\theta$ range for data collection/ $^\circ$ | 4.158 to 57.446                                                    |
| Index ranges                                  | $-13 \leq h \leq 13$ , $-20 \leq k \leq 20$ , $-17 \leq l \leq 17$ |
| Reflections collected                         | 46638                                                              |
| Independent reflections                       | 5200 [ $R_{\text{int}} = 0.0424$ , $R_{\text{sigma}} = 0.0243$ ]   |
| Data/restraints/parameters                    | 5200/28/301                                                        |
| Goodness-of-fit on $F^2$                      | 1.106                                                              |

|                                                |                                  |
|------------------------------------------------|----------------------------------|
| Final R indexes [ $I \geq 2\sigma(I)$ ]        | $R_1 = 0.0481$ , $wR_2 = 0.1259$ |
| Final R indexes [all data]                     | $R_1 = 0.0618$ , $wR_2 = 0.1366$ |
| Largest diff. peak/hole / $e \text{ \AA}^{-3}$ | 0.37/-0.55                       |

\*: DCM molecule on special position with occupation far below 1 leads to the non-integer sum formula. It is assumed, that the DCM can relatively freely evaporate from the lattice without major damage to the crystal.

## 9.6 Crystal data and structure refinement for 5i

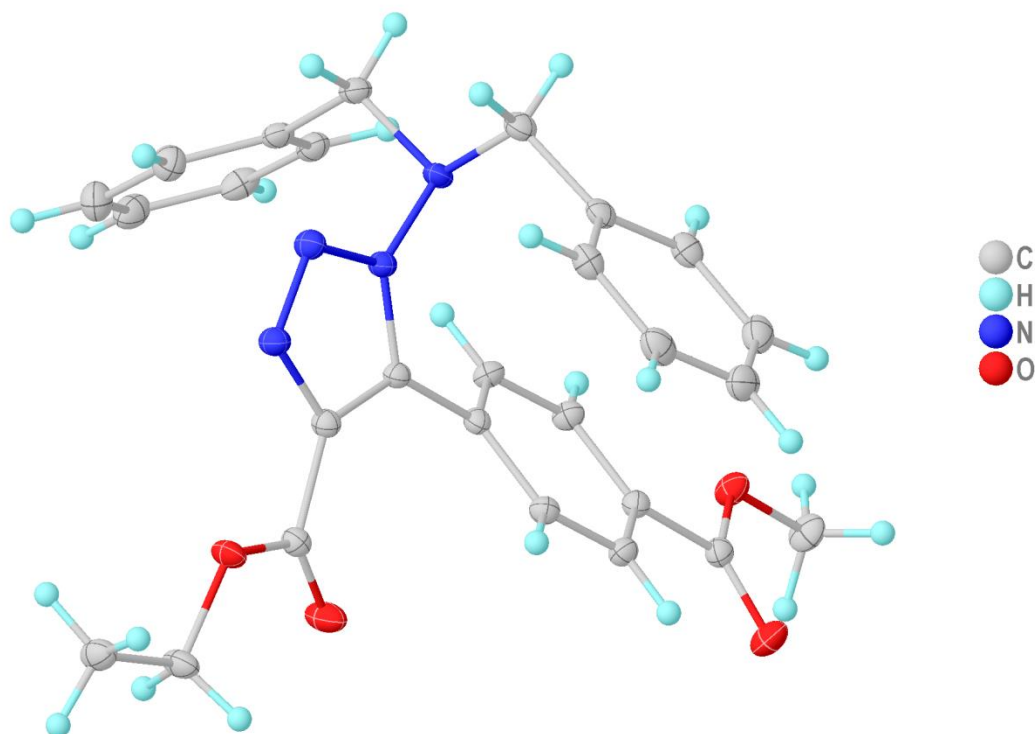

|                                  |                                   |
|----------------------------------|-----------------------------------|
| Empirical formula                | $C_{27}H_{26}N_4O_4$              |
| Formula weight                   | 470.52                            |
| Temperature/K                    | 100.0                             |
| Crystal system                   | monoclinic                        |
| Space group                      | $P2_1/n$                          |
| $a/\text{\AA}$                   | 7.9095(11)                        |
| $b/\text{\AA}$                   | 11.8073(18)                       |
| $c/\text{\AA}$                   | 24.960(4)                         |
| $\alpha/^\circ$                  | 90                                |
| $\beta/^\circ$                   | 91.947(6)                         |
| $\gamma/^\circ$                  | 90                                |
| Volume/ $\text{\AA}^3$           | 2329.7(6)                         |
| Z                                | 4                                 |
| $\rho_{\text{calc}}/\text{cm}^3$ | 1.341                             |
| $\mu/\text{mm}^{-1}$             | 0.092                             |
| F(000)                           | 992.0                             |
| Crystal size/ $\text{mm}^3$      | $0.378 \times 0.275 \times 0.254$ |

|                                                  |                                                               |
|--------------------------------------------------|---------------------------------------------------------------|
| Radiation                                        | MoK $\alpha$ ( $\lambda = 0.71073$ )                          |
| 2 $\theta$ range for data collection/ $^{\circ}$ | 4.75 to 61.052                                                |
| Index ranges                                     | $-11 \leq h \leq 11, 0 \leq k \leq 16, 0 \leq l \leq 35$      |
| Reflections collected                            | 7673                                                          |
| Independent reflections                          | 7673 [ $R_{\text{int}} = ?^*$ , $R_{\text{sigma}} = 0.0206$ ] |
| Data/restraints/parameters                       | 7673/0/319                                                    |
| Goodness-of-fit on $F^2$                         | 1.024                                                         |
| Final R indexes [ $I \geq 2\sigma(I)$ ]          | $R_1 = 0.0359$ , $wR_2 = 0.0884$                              |
| Final R indexes [all data]                       | $R_1 = 0.0412$ , $wR_2 = 0.0928$                              |
| Largest diff. peak/hole / $e \text{ \AA}^{-3}$   | 0.44/-0.25                                                    |

\*: Integrated and refined as non-merohedral twin.

## 9.7 Crystal data and structure refinement for 5s

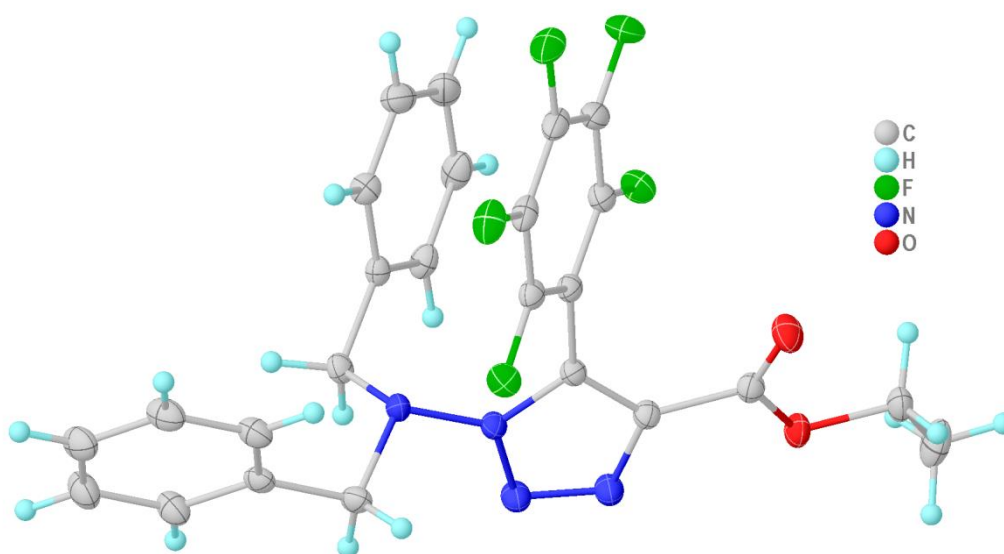

|                                  |                                      |
|----------------------------------|--------------------------------------|
| Empirical formula                | $C_{25}H_{19}F_5N_4O_2$              |
| Formula weight                   | 502.44                               |
| Temperature/K                    | 100.0                                |
| Crystal system                   | triclinic                            |
| Space group                      | P-1                                  |
| $a/\text{\AA}$                   | 7.6176(7)                            |
| $b/\text{\AA}$                   | 12.0476(10)                          |
| $c/\text{\AA}$                   | 13.1839(15)                          |
| $\alpha/^\circ$                  | 85.199(3)                            |
| $\beta/^\circ$                   | 87.319(3)                            |
| $\gamma/^\circ$                  | 74.947(4)                            |
| Volume/ $\text{\AA}^3$           | 1163.9(2)                            |
| Z                                | 2                                    |
| $\rho_{\text{calc}}/\text{cm}^3$ | 1.434                                |
| $\mu/\text{mm}^{-1}$             | 0.120                                |
| F(000)                           | 516.0                                |
| Crystal size/ $\text{mm}^3$      | $0.289 \times 0.241 \times 0.072$    |
| Radiation                        | MoK $\alpha$ ( $\lambda = 0.71073$ ) |

|                                                  |                                                               |
|--------------------------------------------------|---------------------------------------------------------------|
| 2 $\Theta$ range for data collection/ $^{\circ}$ | 4.508 to 61.082                                               |
| Index ranges                                     | $-10 \leq h \leq 10, -17 \leq k \leq 17, -18 \leq l \leq 18$  |
| Reflections collected                            | 85023                                                         |
| Independent reflections                          | 7118 [ $R_{\text{int}} = 0.0190, R_{\text{sigma}} = 0.0104$ ] |
| Data/restraints/parameters                       | 7118/0/326                                                    |
| Goodness-of-fit on $F^2$                         | 1.046                                                         |
| Final R indexes [ $I \geq 2\sigma(I)$ ]          | $R_1 = 0.0335, wR_2 = 0.0923$                                 |
| Final R indexes [all data]                       | $R_1 = 0.0362, wR_2 = 0.0953$                                 |
| Largest diff. peak/hole / $e \text{ \AA}^{-3}$   | 0.44/-0.22                                                    |

## 9.8 Crystal data and structure refinement for 5y

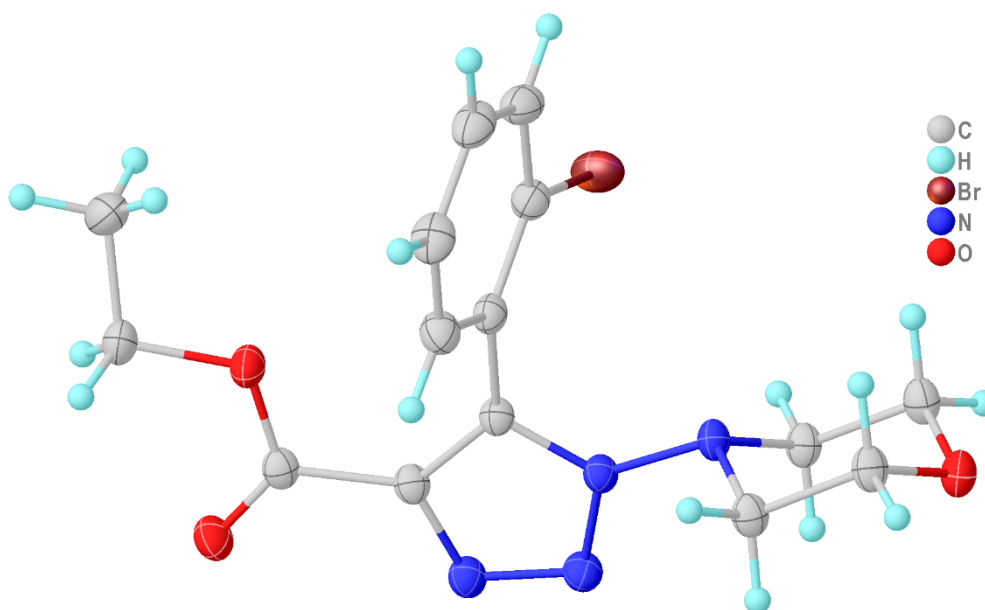

|                                                  |                                      |
|--------------------------------------------------|--------------------------------------|
| Empirical formula                                | $C_{15}H_{17}BrN_4O_3$               |
| Formula weight                                   | 381.24                               |
| Temperature/K                                    | 100.0                                |
| Crystal system                                   | monoclinic                           |
| Space group                                      | $P2_1/n$                             |
| $a/\text{\AA}$                                   | 9.5088(5)                            |
| $b/\text{\AA}$                                   | 8.6800(6)                            |
| $c/\text{\AA}$                                   | 19.6924(11)                          |
| $\alpha/^\circ$                                  | 90                                   |
| $\beta/^\circ$                                   | 100.540(2)                           |
| $\gamma/^\circ$                                  | 90                                   |
| Volume/ $\text{\AA}^3$                           | 1597.92(17)                          |
| Z                                                | 4                                    |
| $\rho_{\text{calc}}/\text{cm}^3$                 | 1.585                                |
| $\mu/\text{mm}^{-1}$                             | 2.593                                |
| F(000)                                           | 776.0                                |
| Crystal size/ $\text{mm}^3$                      | $0.34 \times 0.272 \times 0.203$     |
| Radiation                                        | MoK $\alpha$ ( $\lambda = 0.71073$ ) |
| 2 $\Theta$ range for data collection/ $^{\circ}$ | 5.144 to 61.084                      |

|                                                |                                                               |
|------------------------------------------------|---------------------------------------------------------------|
| Index ranges                                   | $-13 \leq h \leq 13, -12 \leq k \leq 12, -28 \leq l \leq 28$  |
| Reflections collected                          | 59669                                                         |
| Independent reflections                        | 4880 [ $R_{\text{int}} = 0.0259, R_{\text{sigma}} = 0.0134$ ] |
| Data/restraints/parameters                     | 4880/0/209                                                    |
| Goodness-of-fit on $F^2$                       | 1.032                                                         |
| Final R indexes [ $I \geq 2\sigma(I)$ ]        | $R_1 = 0.0242, wR_2 = 0.0667$                                 |
| Final R indexes [all data]                     | $R_1 = 0.0258, wR_2 = 0.0679$                                 |
| Largest diff. peak/hole / $e \text{ \AA}^{-3}$ | 1.04/-0.50                                                    |

## 9.9 Crystal data and structure refinement for 5ab

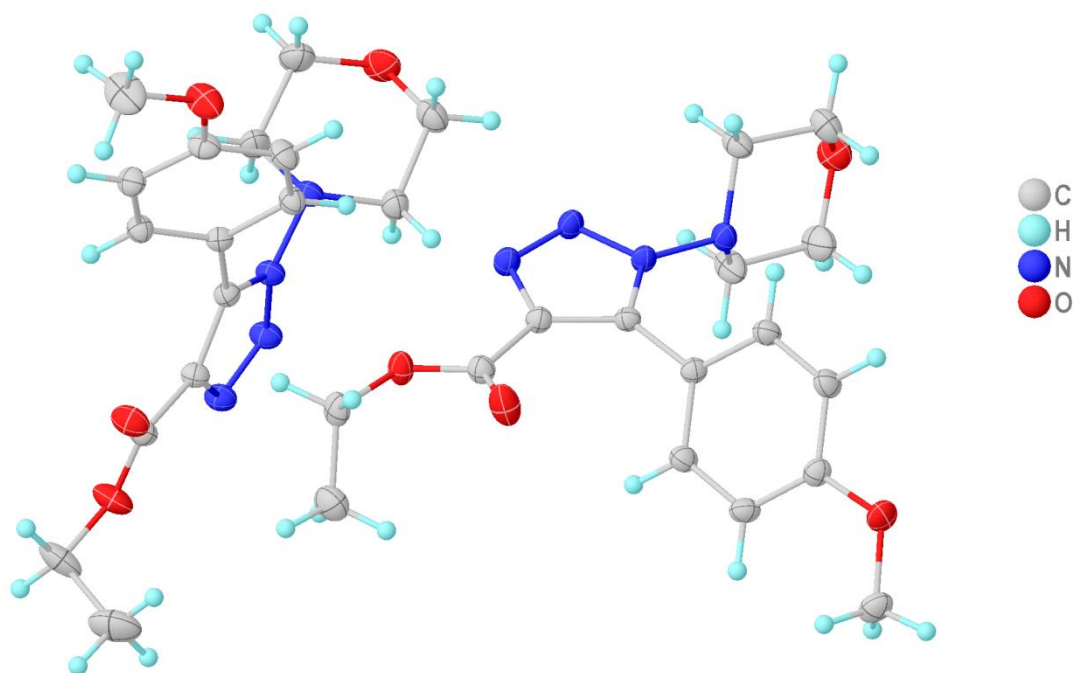

|                                       |                                   |
|---------------------------------------|-----------------------------------|
| Empirical formula                     | $C_{16}H_{20}N_4O_4$              |
| Formula weight                        | 332.36                            |
| Temperature/K                         | 150                               |
| Crystal system                        | monoclinic                        |
| Space group                           | $P2_1/n$                          |
| $a/\text{\AA}$                        | 11.1940(8)                        |
| $b/\text{\AA}$                        | 11.0232(7)                        |
| $c/\text{\AA}$                        | 27.2006(19)                       |
| $\alpha/^\circ$                       | 90                                |
| $\beta/^\circ$                        | 99.377(2)                         |
| $\gamma/^\circ$                       | 90                                |
| Volume/ $\text{\AA}^3$                | 3311.5(4)                         |
| Z                                     | 8                                 |
| $\rho_{\text{calc}}/\text{g cm}^{-3}$ | 1.333                             |
| $\mu/\text{mm}^{-1}$                  | 0.098                             |
| F(000)                                | 1408.0                            |
| Crystal size/ $\text{mm}^3$           | $0.382 \times 0.343 \times 0.282$ |

|                                                  |                                                                    |
|--------------------------------------------------|--------------------------------------------------------------------|
| Radiation                                        | MoK $\alpha$ ( $\lambda = 0.71073$ )                               |
| 2 $\Theta$ range for data collection/ $^{\circ}$ | 3.994 to 59.2                                                      |
| Index ranges                                     | $-15 \leq h \leq 15$ , $-15 \leq k \leq 15$ , $-37 \leq l \leq 37$ |
| Reflections collected                            | 159503                                                             |
| Independent reflections                          | 9310 [ $R_{\text{int}} = 0.0221$ , $R_{\text{sigma}} = 0.0133$ ]   |
| Data/restraints/parameters                       | 9310/0/438                                                         |
| Goodness-of-fit on $F^2$                         | 1.109                                                              |
| Final R indexes [ $I \geq 2\sigma(I)$ ]          | $R_1 = 0.0397$ , $wR_2 = 0.1048$                                   |
| Final R indexes [all data]                       | $R_1 = 0.0423$ , $wR_2 = 0.1067$                                   |
| Largest diff. peak/hole / $e \text{ \AA}^{-3}$   | 0.35/-0.21                                                         |

## 9.10 Crystal data and structure refinement for 7w

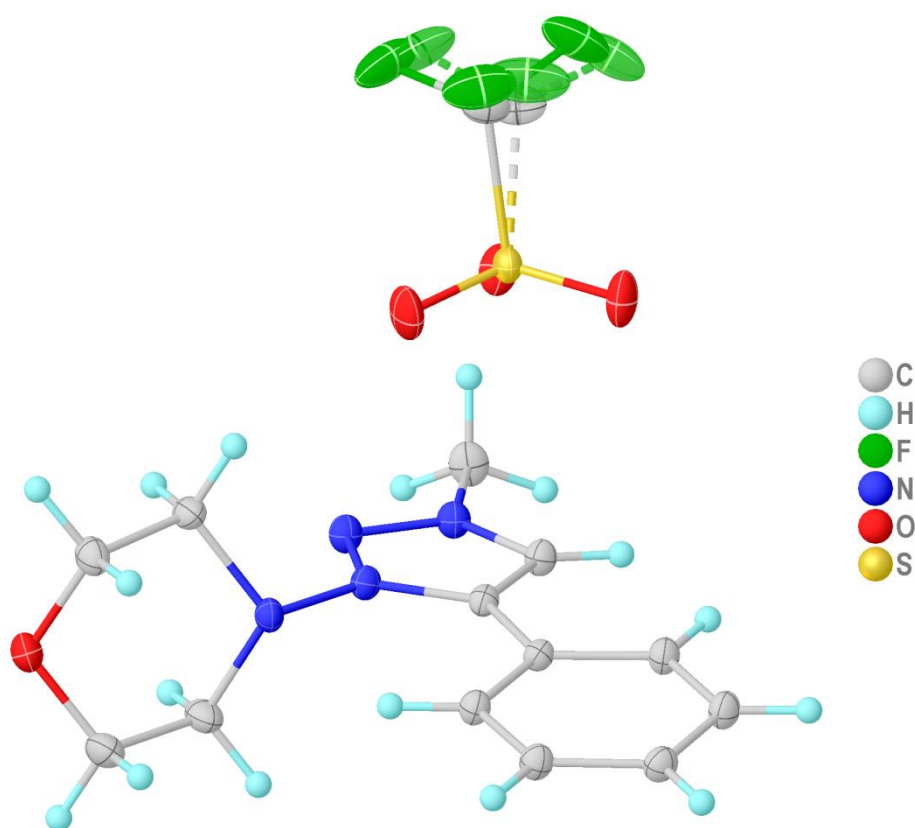

|                   |                          |
|-------------------|--------------------------|
| Empirical formula | $C_{14}H_{17}F_3N_4O_4S$ |
| Formula weight    | 394.37                   |
| Temperature/K     | 100.0                    |
| Crystal system    | triclinic                |
| Space group       | P-1                      |
| $a/\text{\AA}$    | 9.1707(7)                |
| $b/\text{\AA}$    | 9.3189(8)                |
| $c/\text{\AA}$    | 10.6588(7)               |
| $\alpha/^\circ$   | 78.592(2)                |
| $\beta/^\circ$    | 88.611(2)                |
| $\gamma/^\circ$   | 72.022(3)                |

|                                             |                                                                  |
|---------------------------------------------|------------------------------------------------------------------|
| Volume/Å <sup>3</sup>                       | 848.66(11)                                                       |
| Z                                           | 2                                                                |
| $\rho_{\text{calc}}/\text{cm}^3$            | 1.543                                                            |
| $\mu/\text{mm}^{-1}$                        | 0.251                                                            |
| F(000)                                      | 408.0                                                            |
| Crystal size/mm <sup>3</sup>                | 0.308 × 0.304 × 0.26                                             |
| Radiation                                   | MoK $\alpha$ ( $\lambda = 0.71073$ )                             |
| 2 $\theta$ range for data collection/°      | 4.674 to 66.59                                                   |
| Index ranges                                | -14 ≤ h ≤ 14, -14 ≤ k ≤ 14, -16 ≤ l ≤ 16                         |
| Reflections collected                       | 140969                                                           |
| Independent reflections                     | 6497 [ $R_{\text{int}} = 0.0273$ , $R_{\text{sigma}} = 0.0121$ ] |
| Data/restraints/parameters                  | 6497/10/276                                                      |
| Goodness-of-fit on F <sup>2</sup>           | 1.041                                                            |
| Final R indexes [ $I \geq 2\sigma(I)$ ]     | $R_1 = 0.0281$ , $wR_2 = 0.0811$                                 |
| Final R indexes [all data]                  | $R_1 = 0.0289$ , $wR_2 = 0.0818$                                 |
| Largest diff. peak/hole / e Å <sup>-3</sup> | 0.51/-0.37                                                       |

### 9.11 Crystal data and structure refinement for 7x

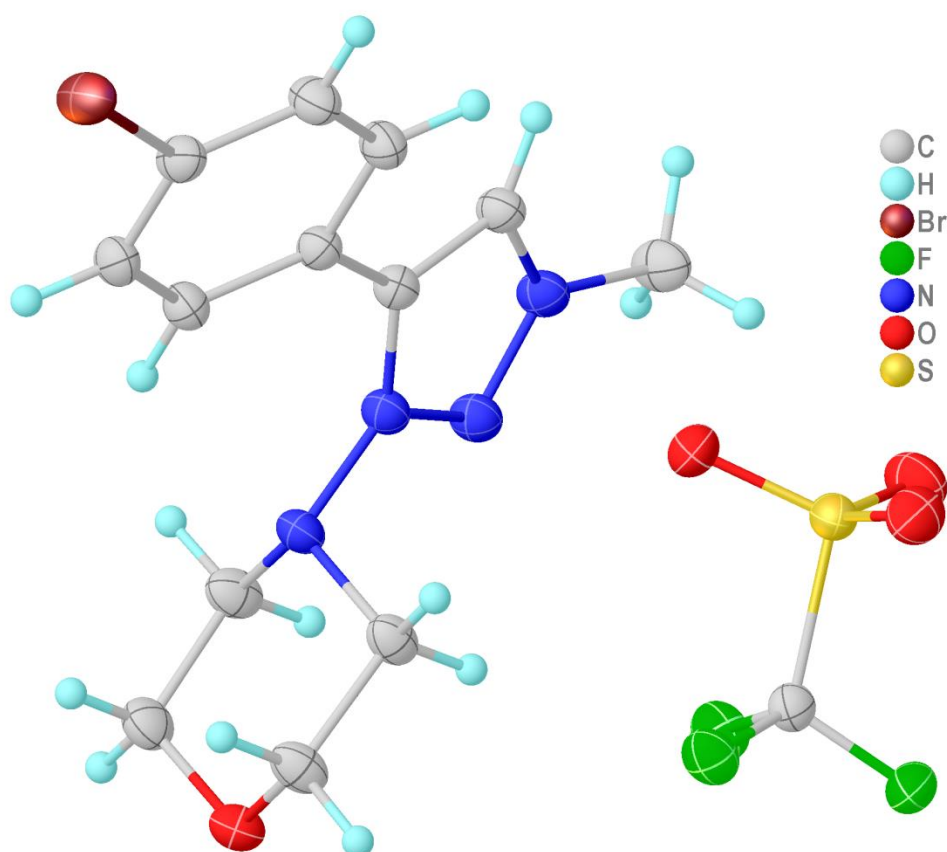

|                   |                                                                                  |
|-------------------|----------------------------------------------------------------------------------|
| Empirical formula | C <sub>14</sub> H <sub>16</sub> BrF <sub>3</sub> N <sub>4</sub> O <sub>4</sub> S |
| Formula weight    | 473.28                                                                           |
| Temperature/K     | 100.0                                                                            |
| Crystal system    | monoclinic                                                                       |
| Space group       | P2 <sub>1</sub> /n                                                               |

|                                                |                                                               |
|------------------------------------------------|---------------------------------------------------------------|
| a/Å                                            | 11.1233(15)                                                   |
| b/Å                                            | 12.0528(19)                                                   |
| c/Å                                            | 13.966(2)                                                     |
| $\alpha/^\circ$                                | 90                                                            |
| $\beta/^\circ$                                 | 98.295(5)                                                     |
| $\gamma/^\circ$                                | 90                                                            |
| Volume/Å <sup>3</sup>                          | 1852.8(5)                                                     |
| Z                                              | 4                                                             |
| $\rho_{\text{calc}}/\text{g/cm}^3$             | 1.697                                                         |
| $\mu/\text{mm}^{-1}$                           | 2.389                                                         |
| F(000)                                         | 952.0                                                         |
| Crystal size/mm <sup>3</sup>                   | 0.551 × 0.401 × 0.322                                         |
| Radiation                                      | MoK $\alpha$ ( $\lambda = 0.71073$ )                          |
| 2 $\Theta$ range for data collection/ $^\circ$ | 4.386 to 61.144                                               |
| Index ranges                                   | -15 ≤ h ≤ 15, 0 ≤ k ≤ 17, 0 ≤ l ≤ 19                          |
| Reflections collected                          | 7040                                                          |
| Independent reflections                        | 7040 [ $R_{\text{int}} = ?^*$ , $R_{\text{sigma}} = 0.0219$ ] |
| Data/restraints/parameters                     | 7040/0/246                                                    |
| Goodness-of-fit on F <sup>2</sup>              | 1.072                                                         |
| Final R indexes [ $I \geq 2\sigma(I)$ ]        | $R_1 = 0.0259$ , $wR_2 = 0.0764$                              |
| Final R indexes [all data]                     | $R_1 = 0.0310$ , $wR_2 = 0.0787$                              |
| Largest diff. peak/hole / e Å <sup>-3</sup>    | 0.40/-0.45                                                    |

\*: Integrated and refined as non-merohedral twin.

## 9.12 Crystal data and structure refinement for 8w

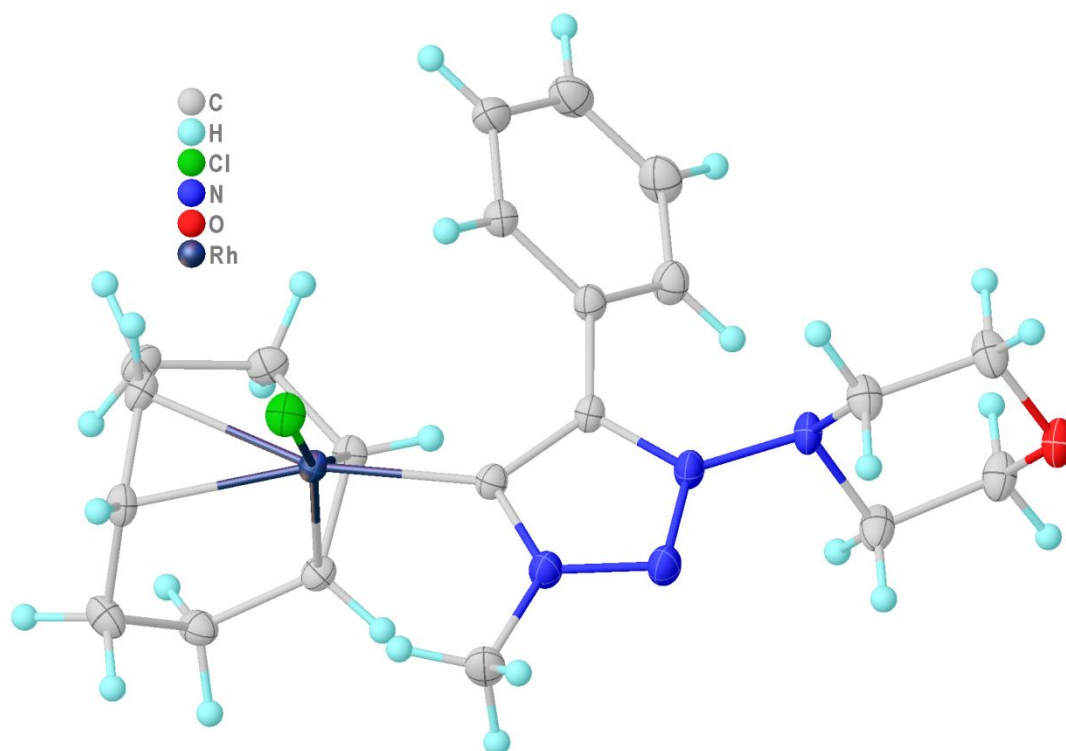

|                   |                                                      |
|-------------------|------------------------------------------------------|
| Empirical formula | C <sub>21</sub> H <sub>28</sub> ClN <sub>4</sub> ORh |
|-------------------|------------------------------------------------------|



|                                             |                                                               |
|---------------------------------------------|---------------------------------------------------------------|
| Formula weight                              | 490.83                                                        |
| Temperature/K                               | 100.0                                                         |
| Crystal system                              | monoclinic                                                    |
| Space group                                 | P2 <sub>1</sub> /c                                            |
| a/Å                                         | 17.1685(9)                                                    |
| b/Å                                         | 9.7210(4)                                                     |
| c/Å                                         | 13.0030(7)                                                    |
| α/°                                         | 90                                                            |
| β/°                                         | 93.961(2)                                                     |
| γ/°                                         | 90                                                            |
| Volume/Å <sup>3</sup>                       | 2164.95(19)                                                   |
| Z                                           | 4                                                             |
| ρ <sub>calc</sub> /cm <sup>3</sup>          | 1.506                                                         |
| μ/mm <sup>-1</sup>                          | 0.931                                                         |
| F(000)                                      | 1008.0                                                        |
| Crystal size/mm <sup>3</sup>                | 0.35 × 0.258 × 0.048                                          |
| Radiation                                   | MoKα (λ = 0.71073)                                            |
| 2θ range for data collection/°              | 4.756 to 65.29                                                |
| Index ranges                                | -25 ≤ h ≤ 25, -12 ≤ k ≤ 14, -19 ≤ l ≤ 19                      |
| Reflections collected                       | 63799                                                         |
| Independent reflections                     | 7753 [R <sub>int</sub> = 0.0236, R <sub>sigma</sub> = 0.0154] |
| Data/restraints/parameters                  | 7753/0/268                                                    |
| Goodness-of-fit on F <sup>2</sup>           | 1.066                                                         |
| Final R indexes [I ≥ 2σ (I)]                | R <sub>1</sub> = 0.0187, wR <sub>2</sub> = 0.0460             |
| Final R indexes [all data]                  | R <sub>1</sub> = 0.0209, wR <sub>2</sub> = 0.0474             |
| Largest diff. peak/hole / e Å <sup>-3</sup> | 0.44/-0.70                                                    |

### 9.13 Crystal data and structure refinement for 8x

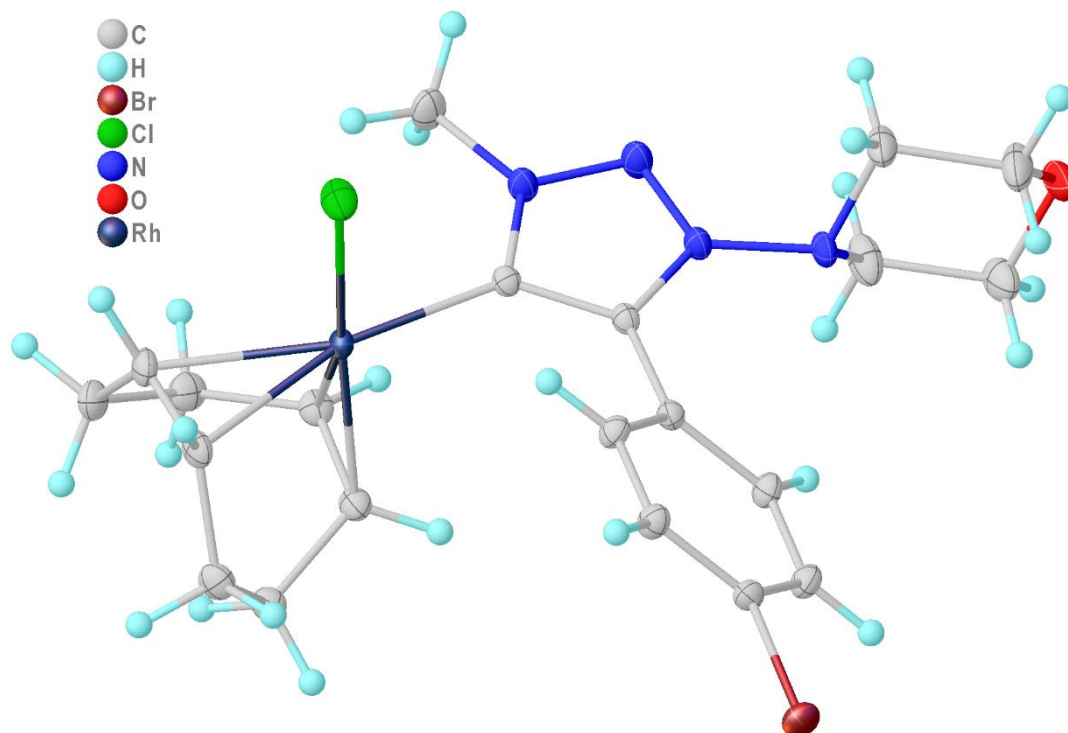

|                                               |                                                               |
|-----------------------------------------------|---------------------------------------------------------------|
| Empirical formula                             | $C_{21}H_{27}BrClN_4ORh$                                      |
| Formula weight                                | 569.73                                                        |
| Temperature/K                                 | 100.0                                                         |
| Crystal system                                | monoclinic                                                    |
| Space group                                   | $P2_1/c$                                                      |
| $a/\text{\AA}$                                | 17.4156(9)                                                    |
| $b/\text{\AA}$                                | 9.6081(4)                                                     |
| $c/\text{\AA}$                                | 14.3393(7)                                                    |
| $\alpha/^\circ$                               | 90                                                            |
| $\beta/^\circ$                                | 113.468(2)                                                    |
| $\gamma/^\circ$                               | 90                                                            |
| Volume/ $\text{\AA}^3$                        | 2200.93(18)                                                   |
| Z                                             | 4                                                             |
| $\rho_{\text{calc}}/\text{g/cm}^3$            | 1.719                                                         |
| $\mu/\text{mm}^{-1}$                          | 2.733                                                         |
| F(000)                                        | 1144.0                                                        |
| Crystal size/ $\text{mm}^3$                   | $0.547 \times 0.381 \times 0.04$                              |
| Radiation                                     | MoK $\alpha$ ( $\lambda = 0.71073$ )                          |
| $2\theta$ range for data collection/ $^\circ$ | 4.948 to 61.072                                               |
| Index ranges                                  | $-24 \leq h \leq 24, -13 \leq k \leq 13, -20 \leq l \leq 20$  |
| Reflections collected                         | 67001                                                         |
| Independent reflections                       | 6746 [ $R_{\text{int}} = 0.0252, R_{\text{sigma}} = 0.0140$ ] |
| Data/restraints/parameters                    | 6746/0/263                                                    |
| Goodness-of-fit on $F^2$                      | 1.037                                                         |
| Final R indexes [ $I \geq 2\sigma(I)$ ]       | $R_1 = 0.0198, wR_2 = 0.0498$                                 |

|                                                |                                  |
|------------------------------------------------|----------------------------------|
| Final R indexes [all data]                     | $R_1 = 0.0214$ , $wR_2 = 0.0507$ |
| Largest diff. peak/hole / $e \text{ \AA}^{-3}$ | 0.77/-0.84                       |

## 10. References

- [1] M. A. Ischay, Z. Lu, T. P. Yoon, *J. Am. Chem. Soc.* **2010**, *132*, 8572–8574.
- [2] A. B. Tamayo, B. D. Alleyne, P. I. Djurovich, S. Lamansky, I. Tsyba, N. N. Ho, R. Bau, M. E. Thompson, *J. Am. Chem. Soc.* **2003**, *125*, 7377–7387.
- [3] J. D. Slinker, A. A. Gorodetsky, M. S. Lowry, J. Wang, S. Parker, R. Rohl, S. Bernhard, G. G. Malliaras, *J. Am. Chem. Soc.* **2004**, *126*, 2763–2767.
- [4] J. Luo, J. Zhang, *ACS Catal.* **2016**, *6*, 873–877.
- [5] B. Waldecker, F. Kraft, C. Golz, M. Alcarazo, *Angew. Chem. Int. Ed.* **2018**, *57*, 12538–12542.
- [6] K. Amani, M. A. Zolfigol, A. Ghorbani-Choghamarani, M. Hajjami, *Monatsh. Chem.* **2009**, *140*, 65–68.
- [7] H. Marom, S. Antonov, Y. Popowski, M. Gozin, *J. Org. Chem.* **2011**, *76*, 5240–5246.
- [8] S. Hyde, J. Veliks, B. Liegault, D. Grassi, M. Taillefer, V. Gouverneur, *Angew. Chem. Int. Ed.* **2016**, *55*, 3785–3789.
- [9] P. K. Mykhailiuk, *Chem. Rev.* **2020**, *120*, 12718–12755.
- [10] M. Ke, Q. Song, *J. Org. Chem.* **2016**, *81*, 3654–3664.
- [11] D. Miyazaki, K. Nomura, T. Yamashita, I. Iwakura, T. Ikeno, T. Yamada, *Org. Lett.* **2003**, *5*, 3555–3558.
- [12] A. V. Dubrovskiy, R. C. Larock, *J. Org. Chem.* **2012**, *77*, 11232–11256.
- [13] J. Mohr, D. Porwal, I. Chatterjee, M. Oestreich, *Chem. Eur. J.* **2015**, *21*, 17583–17586.
- [14] P. Xu, G. Wang, Y. Zhu, W. Li, Y. Cheng, S. Li, C. Zhu, *Angew. Chem. Int. Ed.* **2016**, *55*, 2939–2943.
- [15] X. Xu, F. Liu, *Org. Chem. Front.* **2017**, *4*, 2306–2310.
- [16] J. Xie, T. Zhang, F. Chen, N. Mehrkens, F. Rominger, M. Rudolph, A. S. K. Hashmi, *Angew. Chem. Int. Ed.* **2016**, *55*, 2934–2938.
- [17] S. Sabater, H. Müller-Bunz, M. Albrecht, *Organometallics* **2016**, *35*, 2256–2266.
- [18] M. T. Zamora, M. J. Ferguson, M. Cowie, *Organometallics* **2012**, *31*, 5384–5395.
- [19] M. Alcarazo, R. Fernández, E. Álvarez, J. M. Lassaletta, *J. Organomet. Chem.* **2005**, *690*, 5979–5988.
- [20] J. R. Lakowicz, *Principles of Fluorescence Spectroscopy*, 3<sup>rd</sup> Ed., Chap. 3, pp. 63–97, Chap. 8, pp. 278–289, Springer US, New York, 2006.

- [21] N. Elgrishi, K. J. Rountree, B. D. McCarthy, E. S. Rountree, T. T. Eisenhart, J. L. Dempsey, *J. Chem. Educ.* **2018**, *95*, 197–206.
- [22] J. R. Aranzaes, M.-C. Daniel, D. Astruc, *Can. J. Chem.* **2006**, *84*, 288–299.
- [23] M. Montalti, A. Credi, L. Prodi, M. T. Gandolfi, *Handbook of Photochemistry* (CRC/Taylor & Francis, Boca Raton, FL, ed. 3, 2006).
- [24] H. J. Kuhn, S. E. Braslavsky, R. Schmidt, *Pure Appl. Chem.* **2004**, *76*, 2105–2146.
- [25] Z. Wang, A. G. Herraiz, A. M. del Hoyo, M. G. Suero, *Nature*, **2018**, *554*, 86–91.
- [26] G. M. Sheldrick, *Acta Cryst.* **2008**, *A64*, 112–122.
- [27] O. V. Dolomanov, L. J. Bourhis, R. J. Gildea, J. A. K. Howard, H. Puschmann, *J. Appl. Cryst.* **2009**, *42*, 339–341.
- [28] T. Kottke, D. Stalke, *J. Appl. Cryst.* **1993**, *26*, 615–619.

# 11. NMR spectra

## <sup>1</sup>H NMR (300 MHz, CDCl<sub>3</sub>)

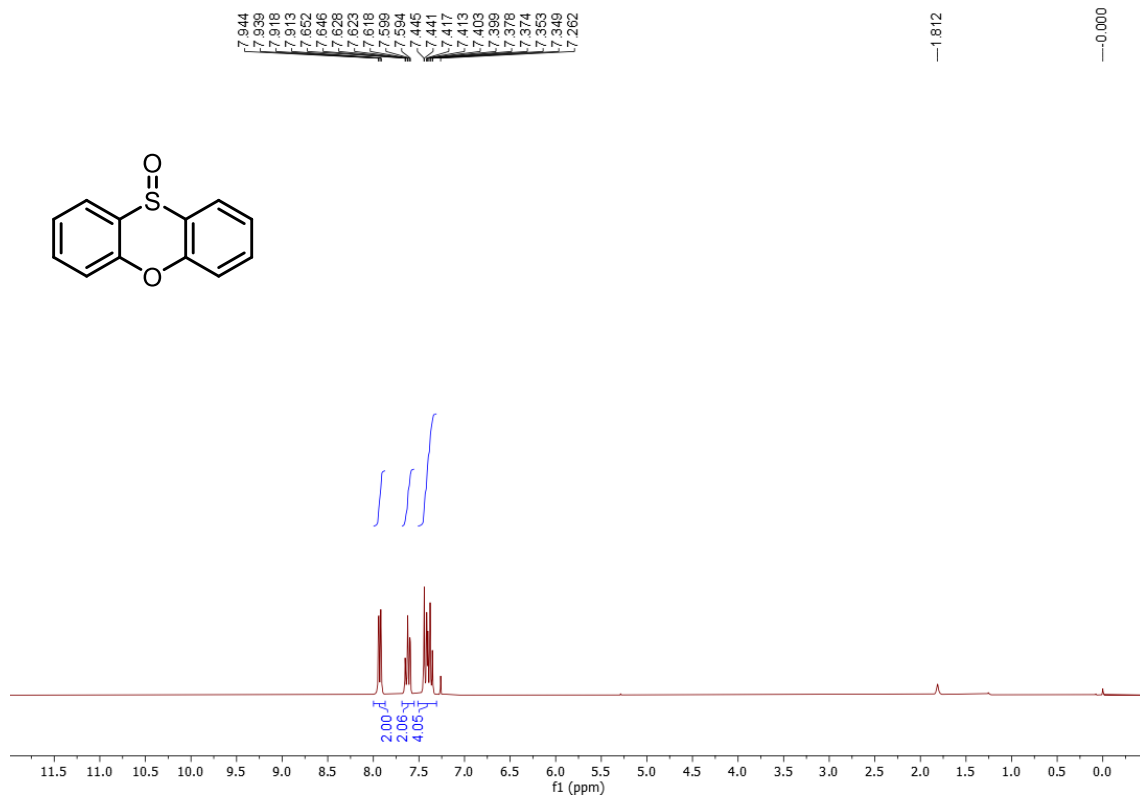

## <sup>13</sup>C NMR (75 MHz, CDCl<sub>3</sub>)

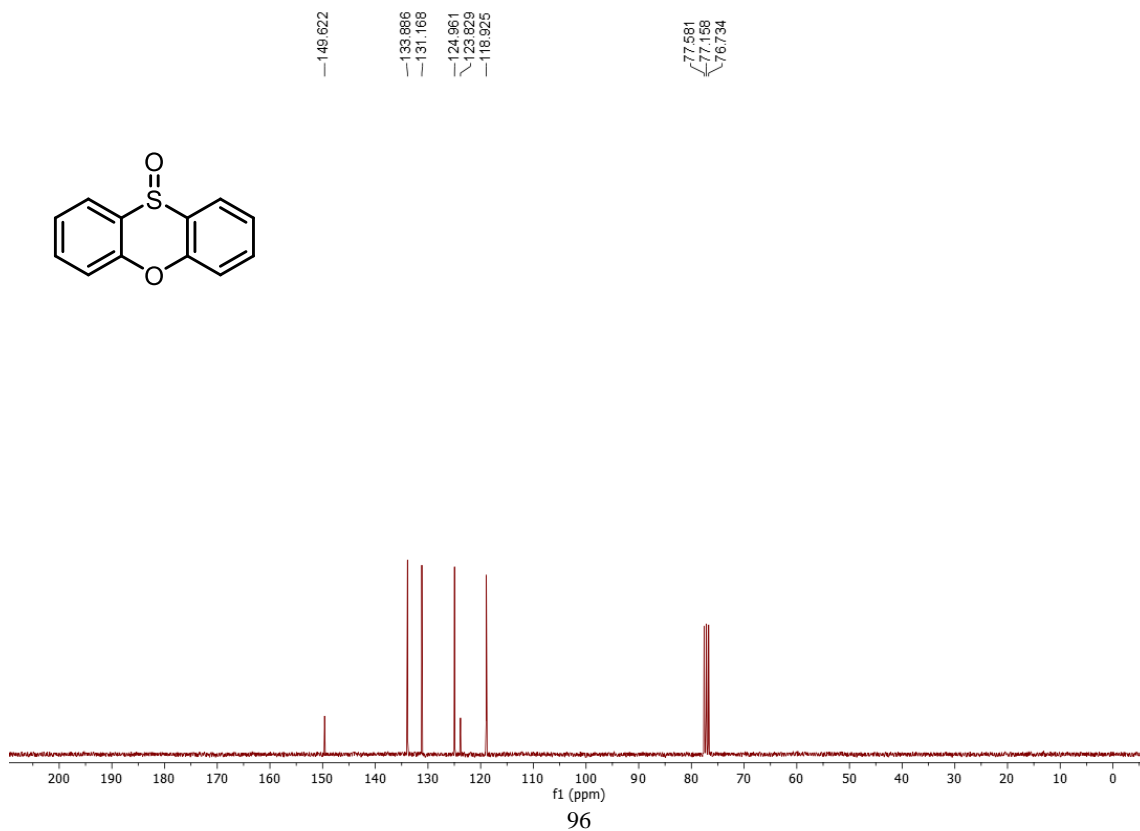

# <sup>1</sup>H NMR (300 MHz, CD<sub>3</sub>CN)

8.315  
8.313  
8.310  
8.288  
8.284  
8.245  
8.241  
8.219  
8.215  
7.936  
7.932  
7.911  
7.907  
7.885  
7.881  
7.781  
7.777  
7.756  
7.754  
7.751  
7.729  
7.725

3.928  
3.904  
3.881  
3.857

2.193  
1.966  
1.948  
1.940  
1.932  
1.923

0.881  
0.857  
0.833

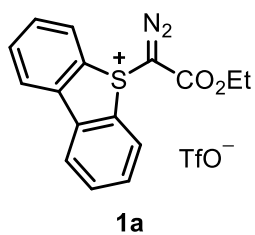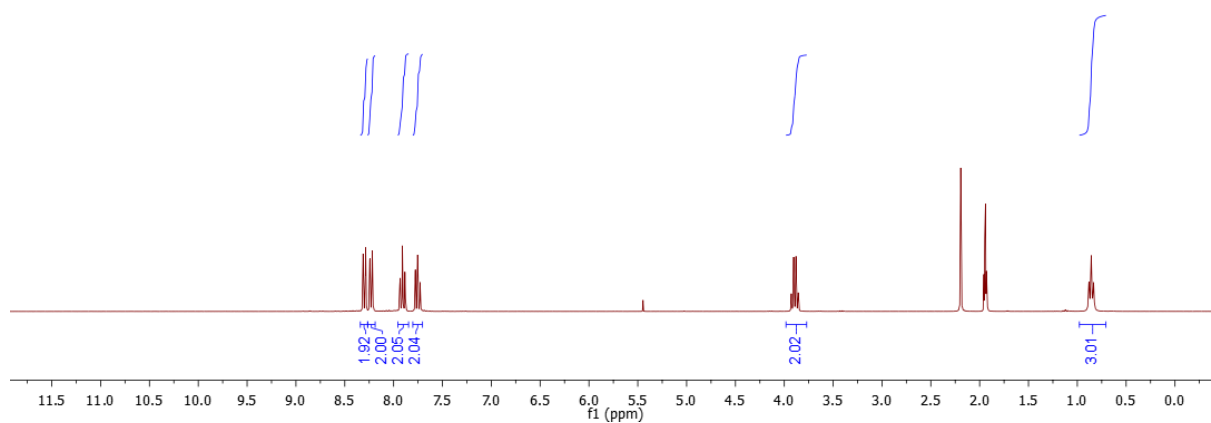

# <sup>13</sup>C NMR (75 MHz, CD<sub>3</sub>CN)

159.042  
140.211  
135.576  
132.286  
128.541  
128.941  
124.913  
124.241  
119.993  
118.325

64.393

13.899  
21.147  
18.71  
15.96  
13.21  
10.45  
0.769  
0.495

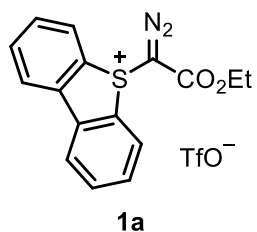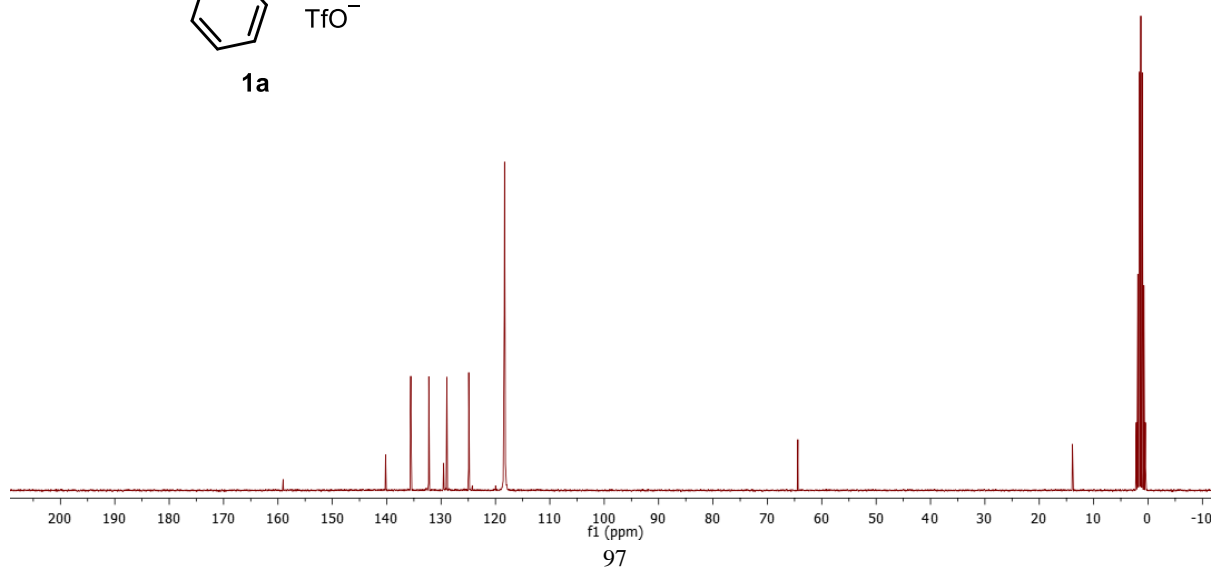

# <sup>1</sup>H NMR (300 MHz, CD<sub>3</sub>CN)

8.433  
8.430  
8.406  
8.402  
8.272  
8.268  
8.246  
8.242  
7.984  
7.980  
7.959  
7.955  
7.933  
7.929  
7.838  
7.834  
7.812  
7.808  
7.786  
7.782

2.179  
1.957  
1.948  
1.940  
1.932  
1.924

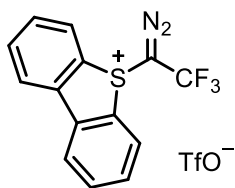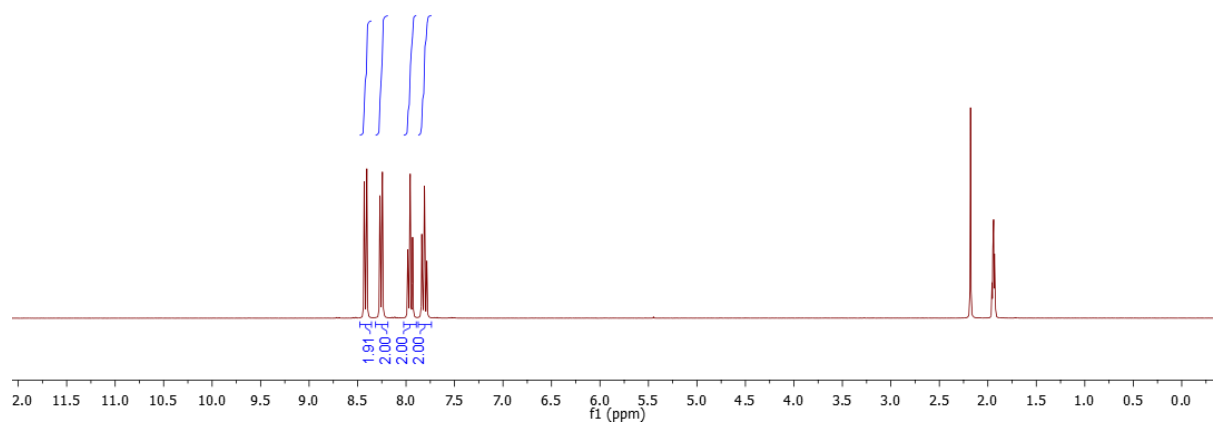

# <sup>13</sup>C NMR (75 MHz, CD<sub>3</sub>CN)

139.399  
136.369  
132.770  
129.602  
128.792  
128.510  
126.577  
124.876  
124.266  
121.251  
120.015  
118.337

2.146  
1.870  
1.596  
1.320  
1.044  
0.770  
0.494

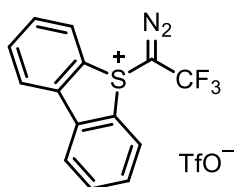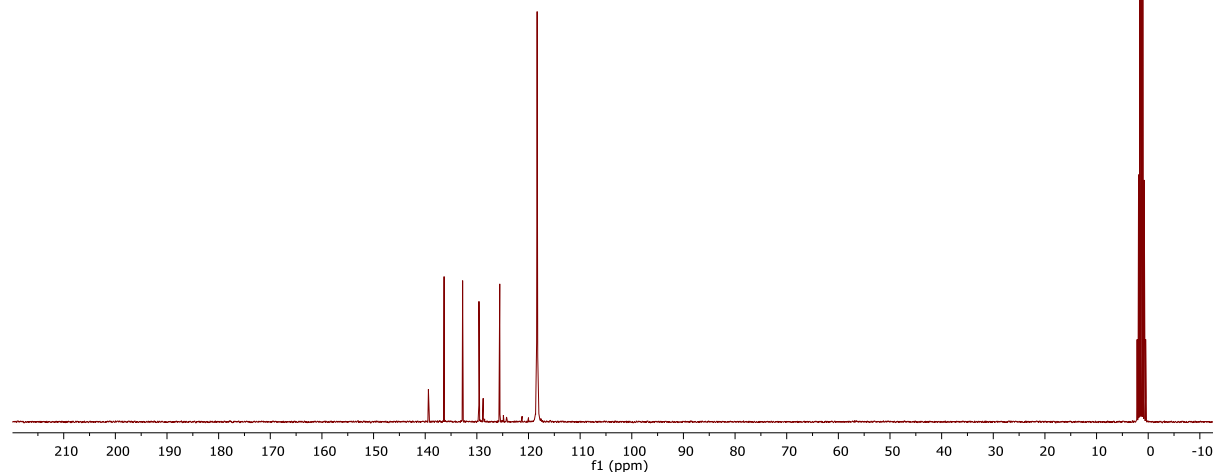

# <sup>19</sup>F NMR (282 MHz, CD<sub>3</sub>CN)

-55.269  
-79.266

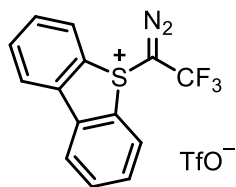

**1b**

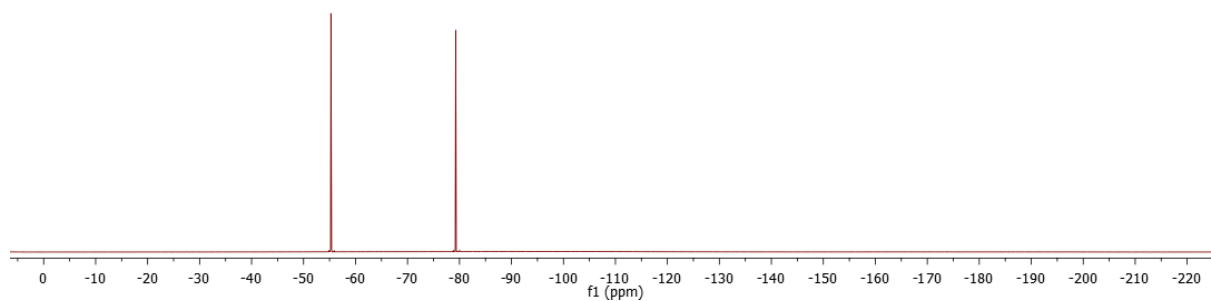

# <sup>1</sup>H NMR (300 MHz, CD<sub>3</sub>CN)

8.208, 8.205, 8.201, 8.182, 8.178, 8.174, 8.174, 7.998, 7.995, 7.991, 7.973, 7.969, 7.964, 7.861, 7.877, 7.873, 7.866, 7.862, 7.848, 7.830, 7.826, 7.822, 7.778, 7.775, 7.771, 7.749, 7.744, 7.727, 7.723, 7.719, 4.315, 4.291, 4.267, 4.244, 2.443, 1.969, 1.966, 1.951, 1.948, 1.943, 1.940, 1.934, 1.931, 1.924, 1.256, 1.232, 1.208

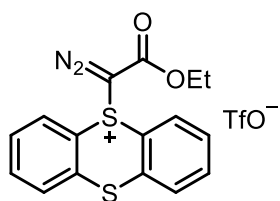

**1c**

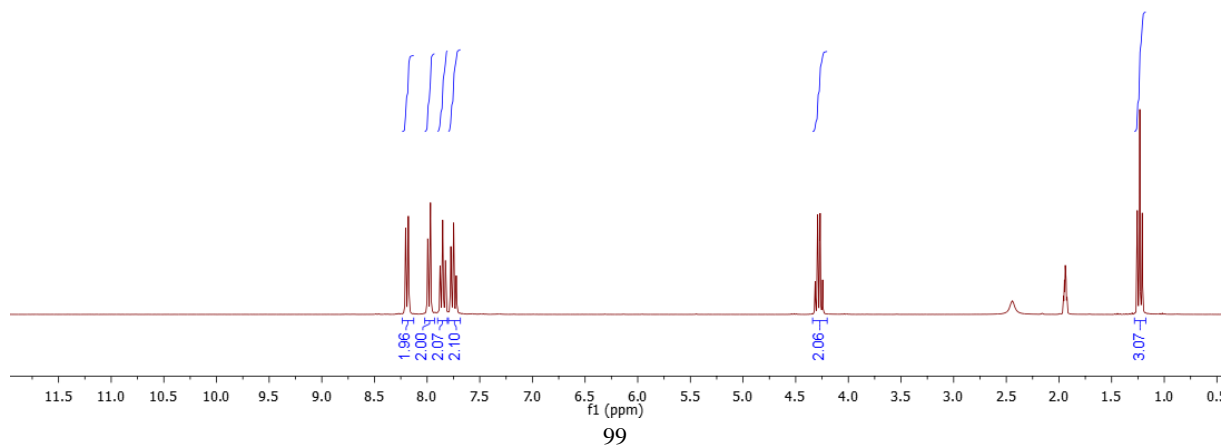



### $^{13}\text{C}$ NMR (75 MHz, $\text{CD}_3\text{CN}$ )

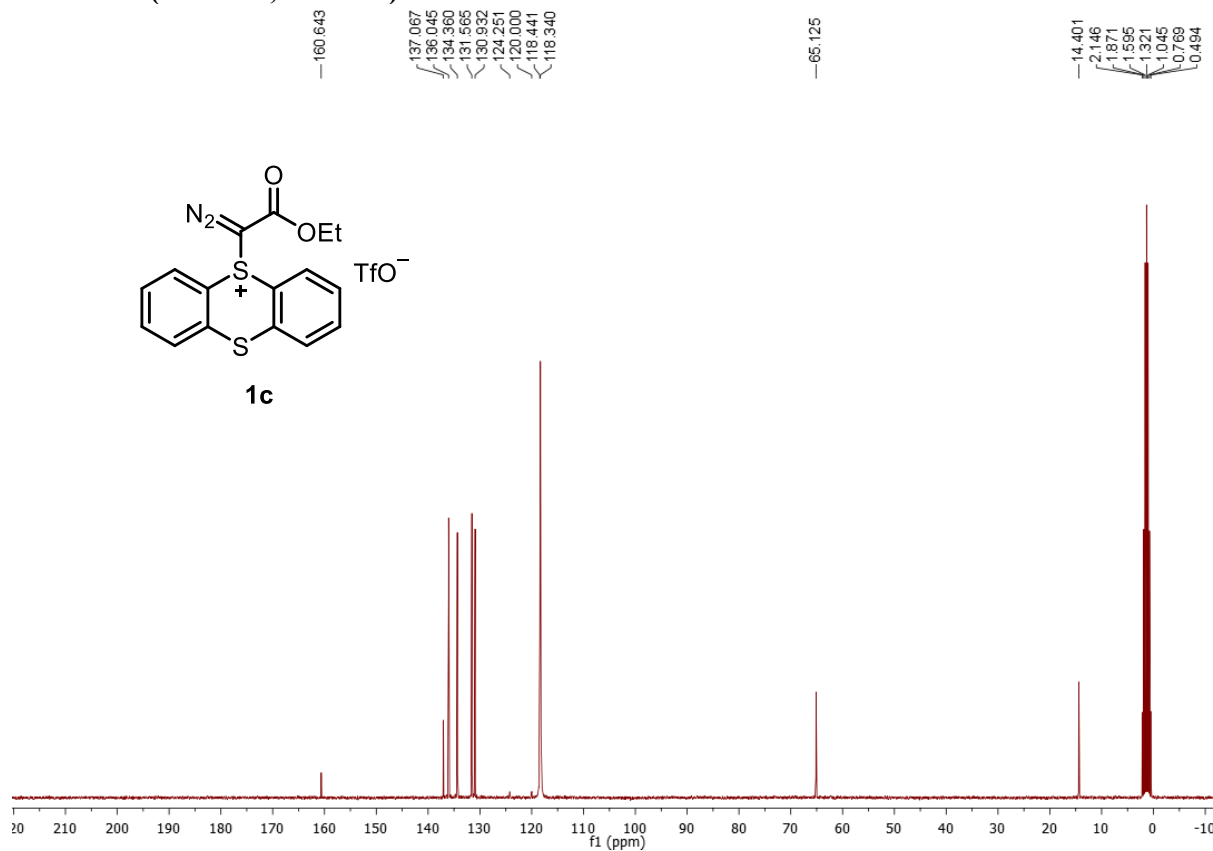

### $^1\text{H}$ NMR (300 MHz, $\text{CD}_3\text{CN}$ )

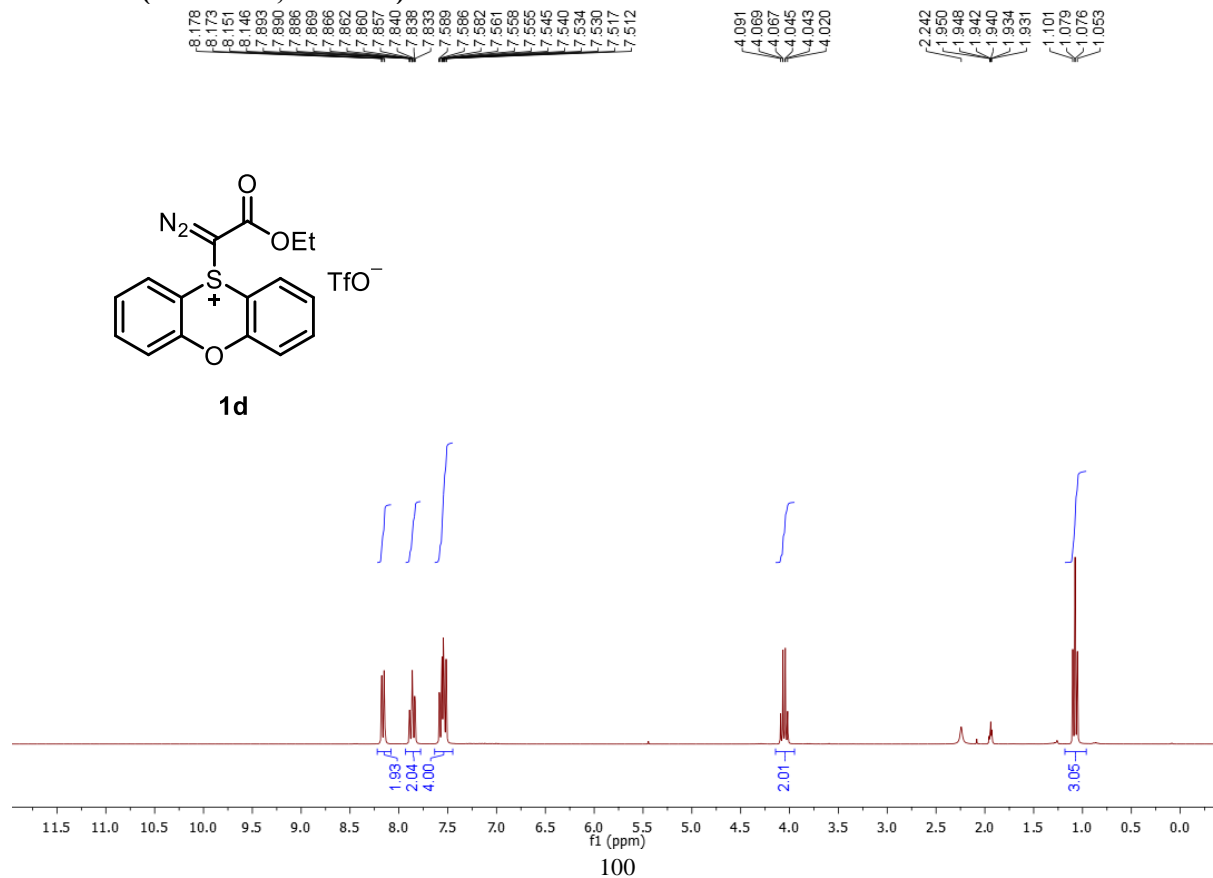

### $^{13}\text{C}$ NMR (75 MHz, $\text{CD}_3\text{CN}$ )

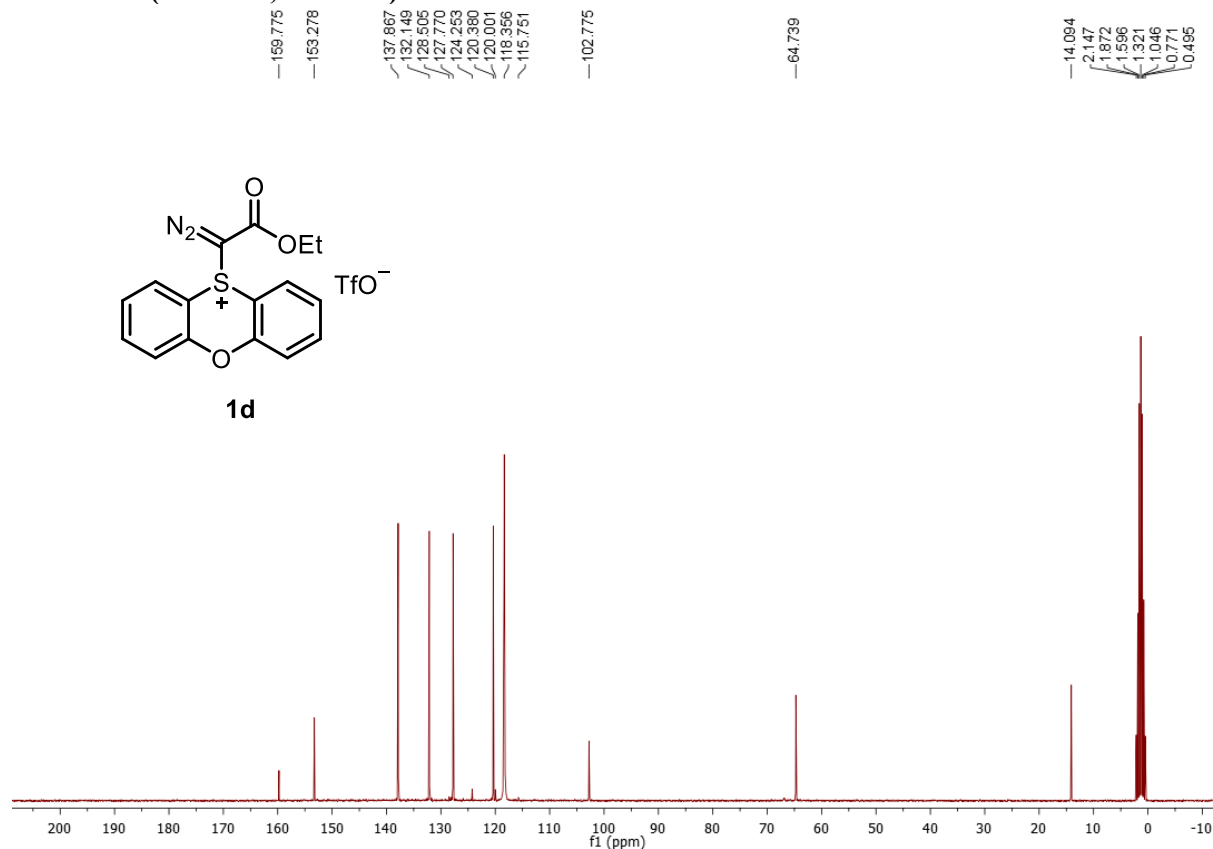

### $^1\text{H}$ NMR (300 MHz, $\text{CD}_3\text{CN}$ )

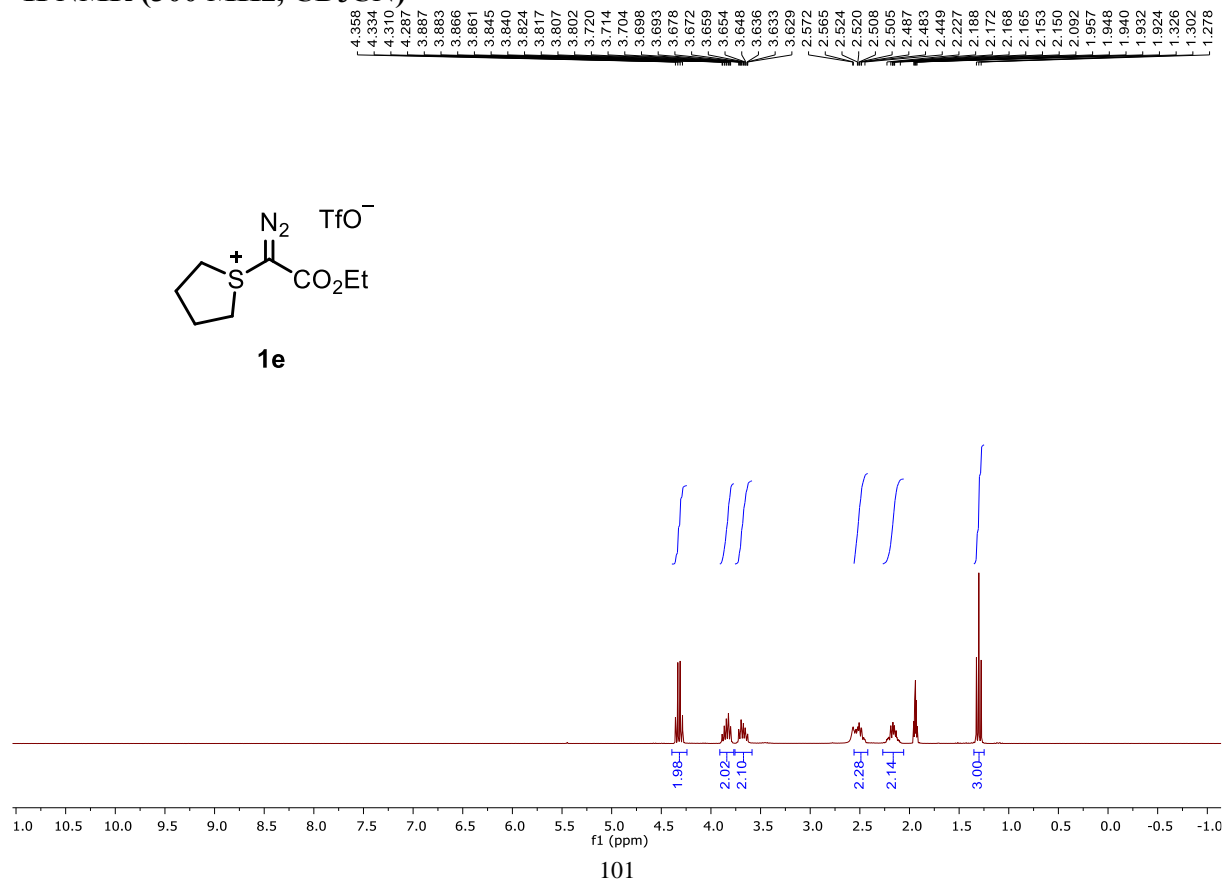

### $^{13}\text{C}$ NMR (100 MHz, $\text{CD}_3\text{CN}$ )

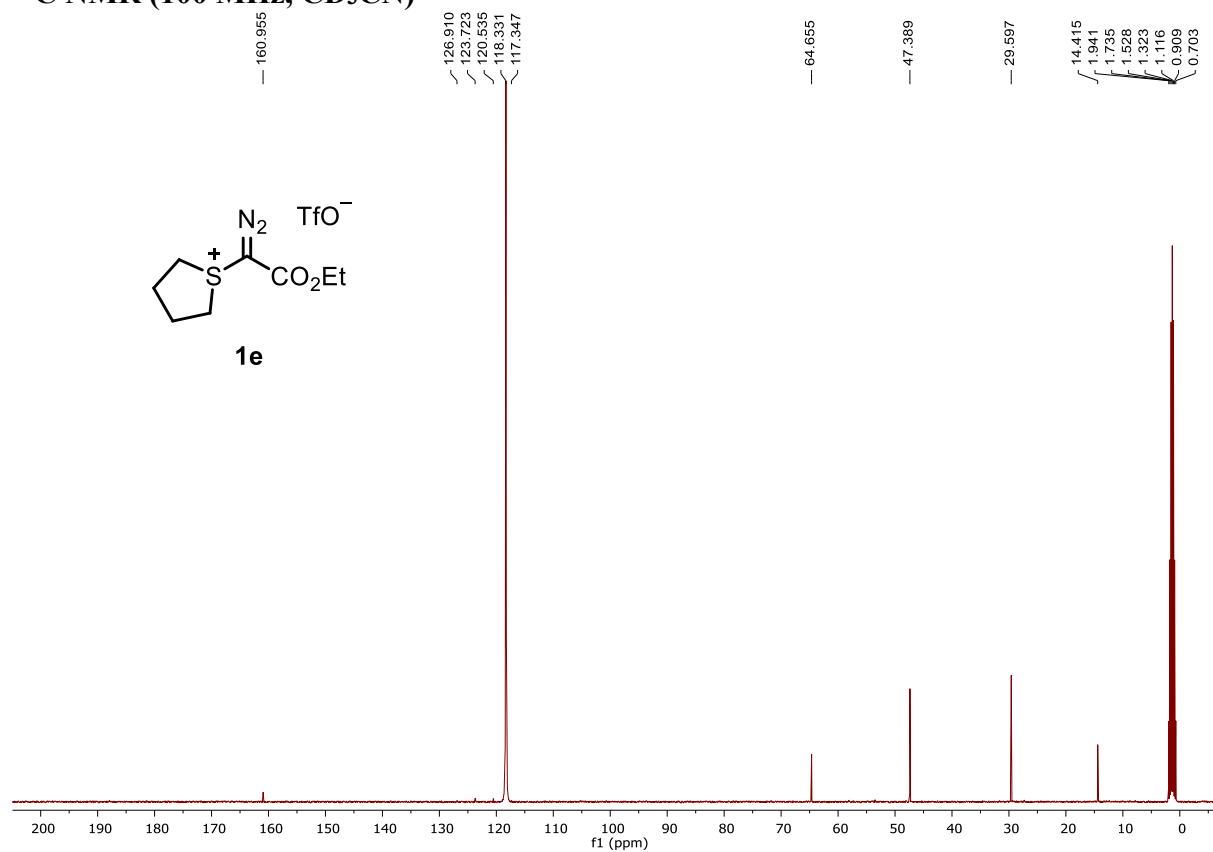

### $^1\text{H}$ NMR (300 MHz, $\text{CDCl}_3$ )

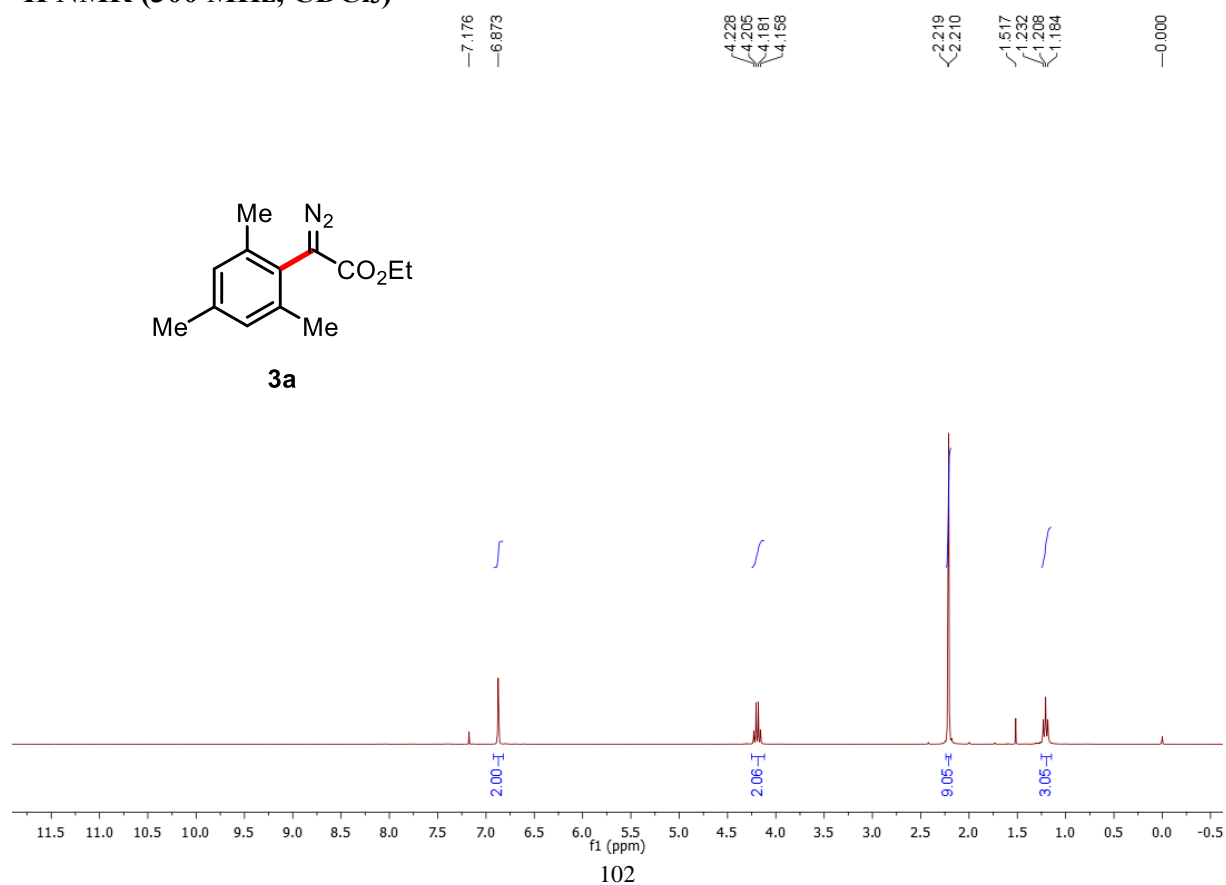

**<sup>1</sup>H NMR (400 MHz, CDCl<sub>3</sub>)**

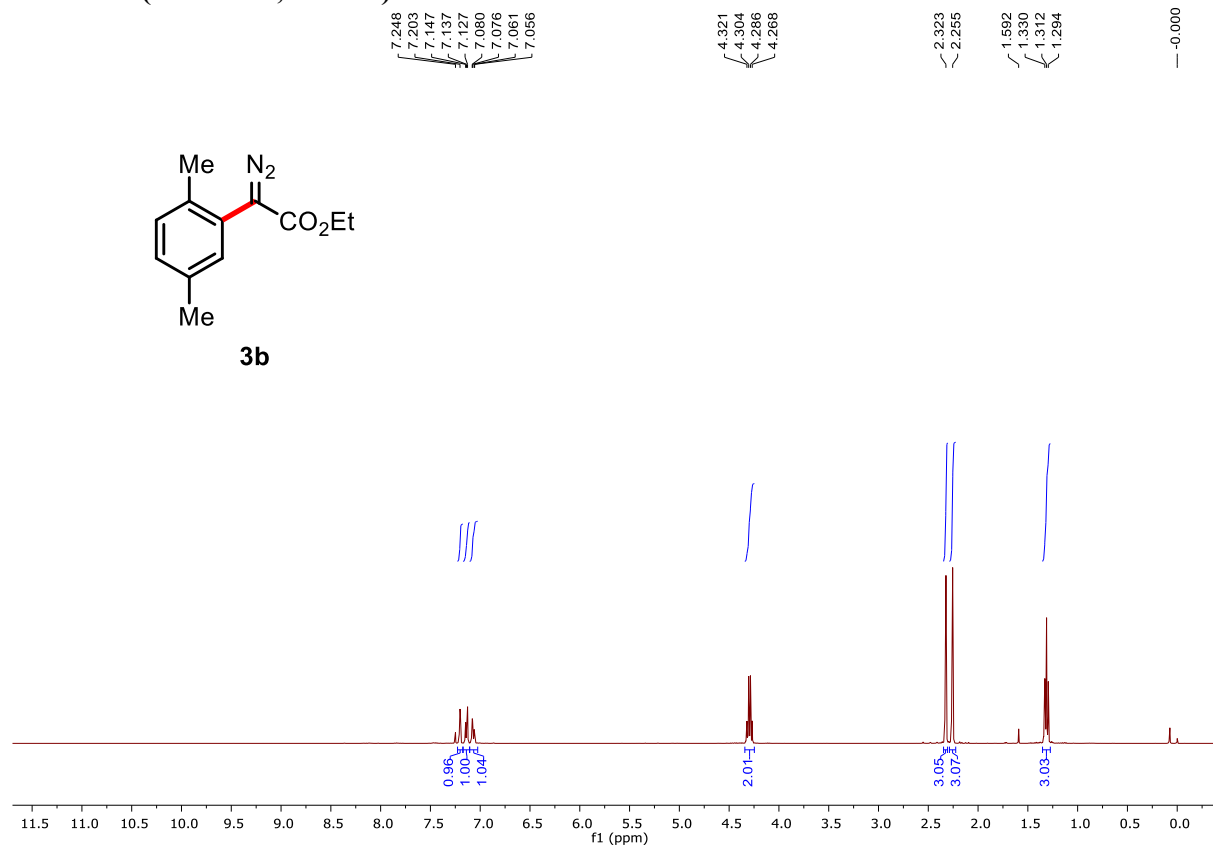

**<sup>1</sup>H NMR (300 MHz, CDCl<sub>3</sub>)**

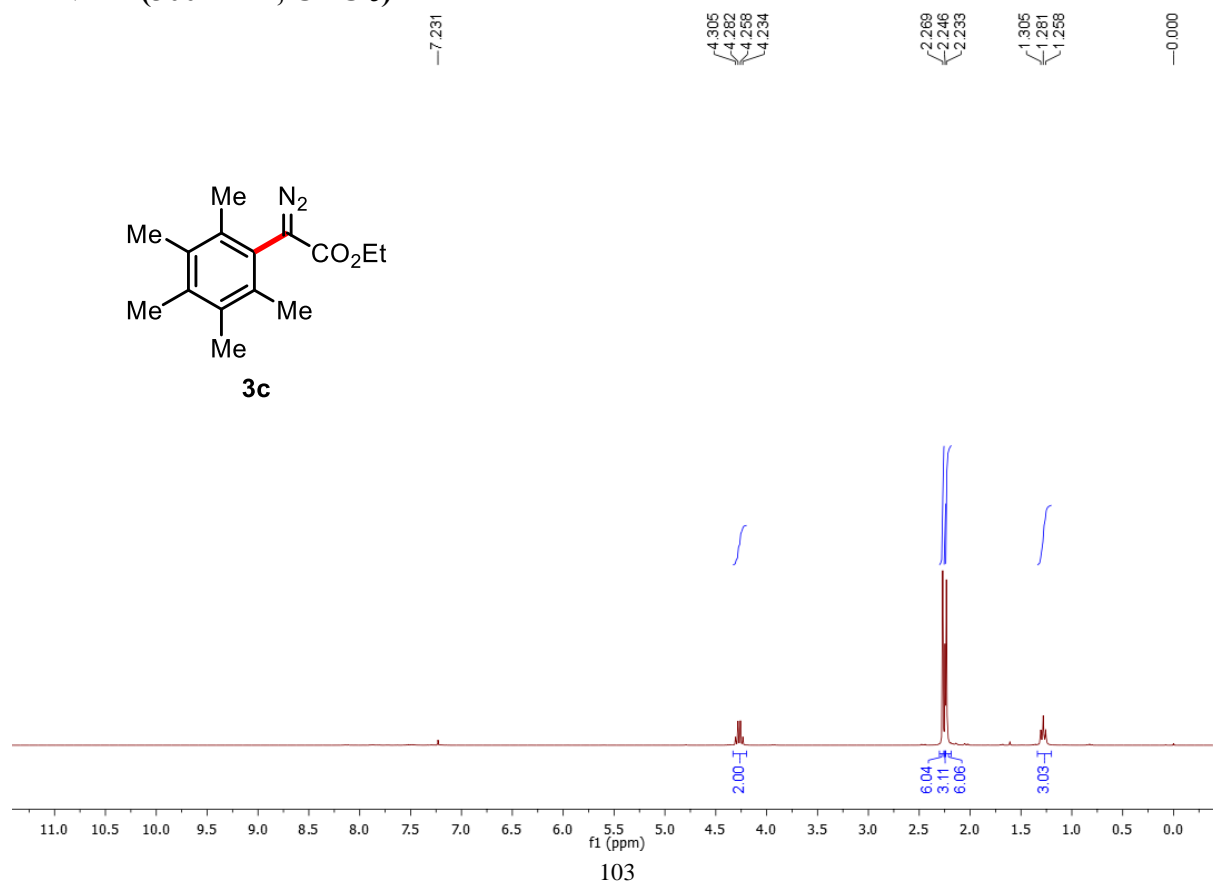

**<sup>13</sup>C NMR (100 MHz, CDCl<sub>3</sub>)**

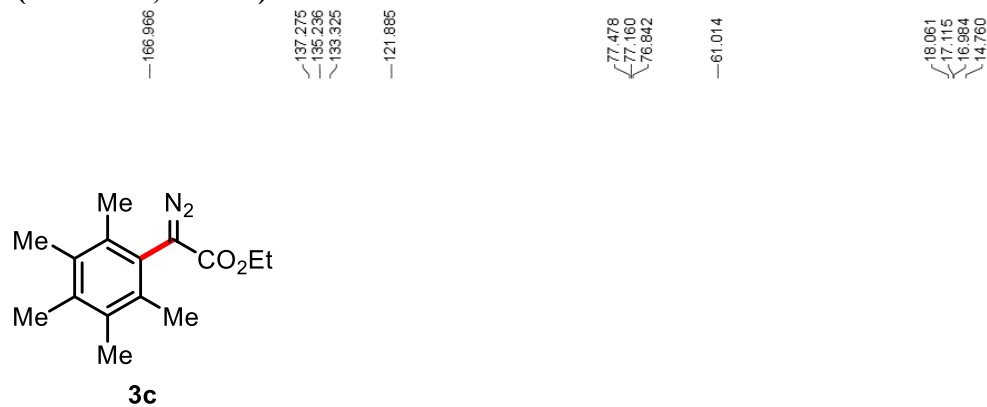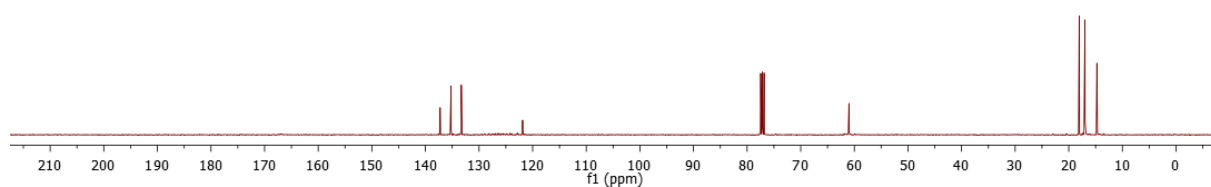

**<sup>1</sup>H NMR (300 MHz, CDCl<sub>3</sub>)**

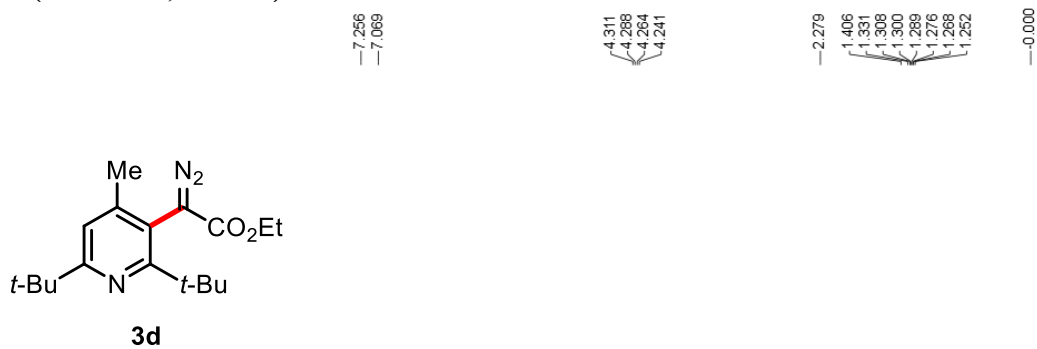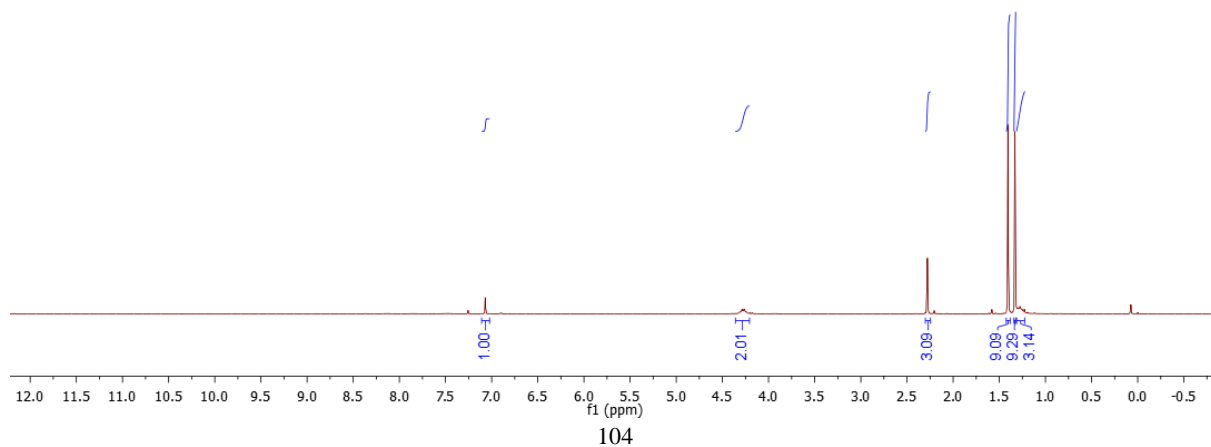

### <sup>1</sup>H NMR (300 MHz, CDCl<sub>3</sub>)

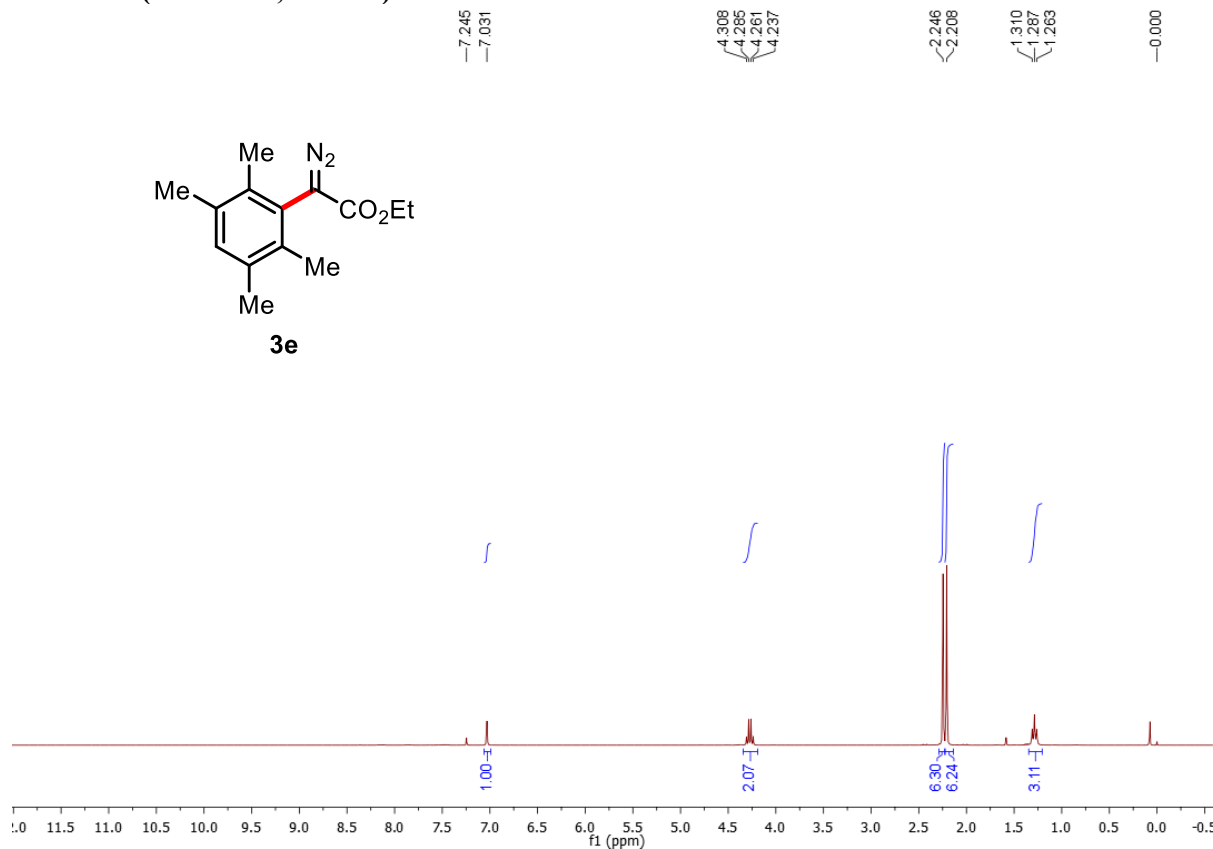

### <sup>13</sup>C NMR (100 MHz, CDCl<sub>3</sub>)

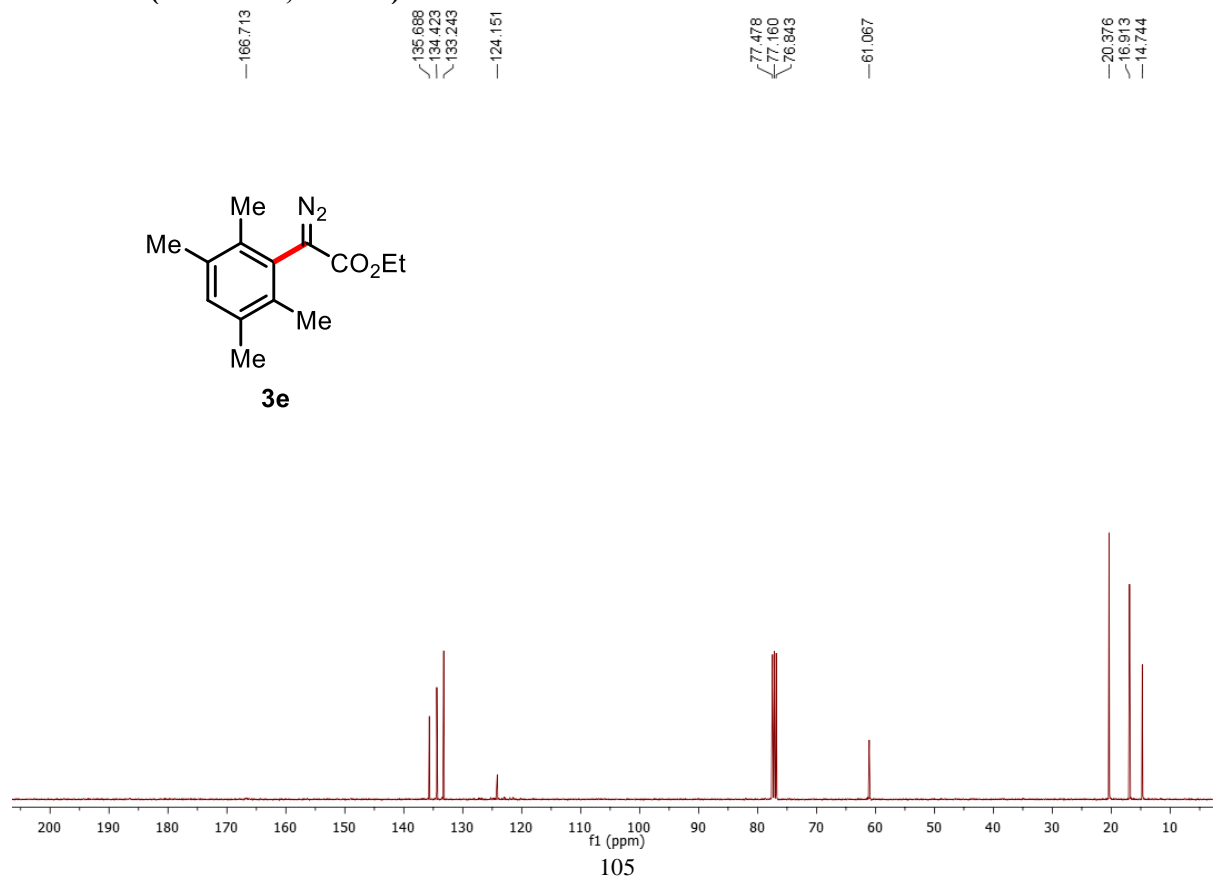

### <sup>1</sup>H NMR (300 MHz, CDCl<sub>3</sub>)

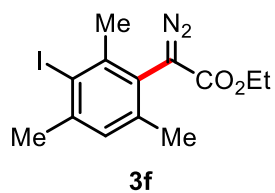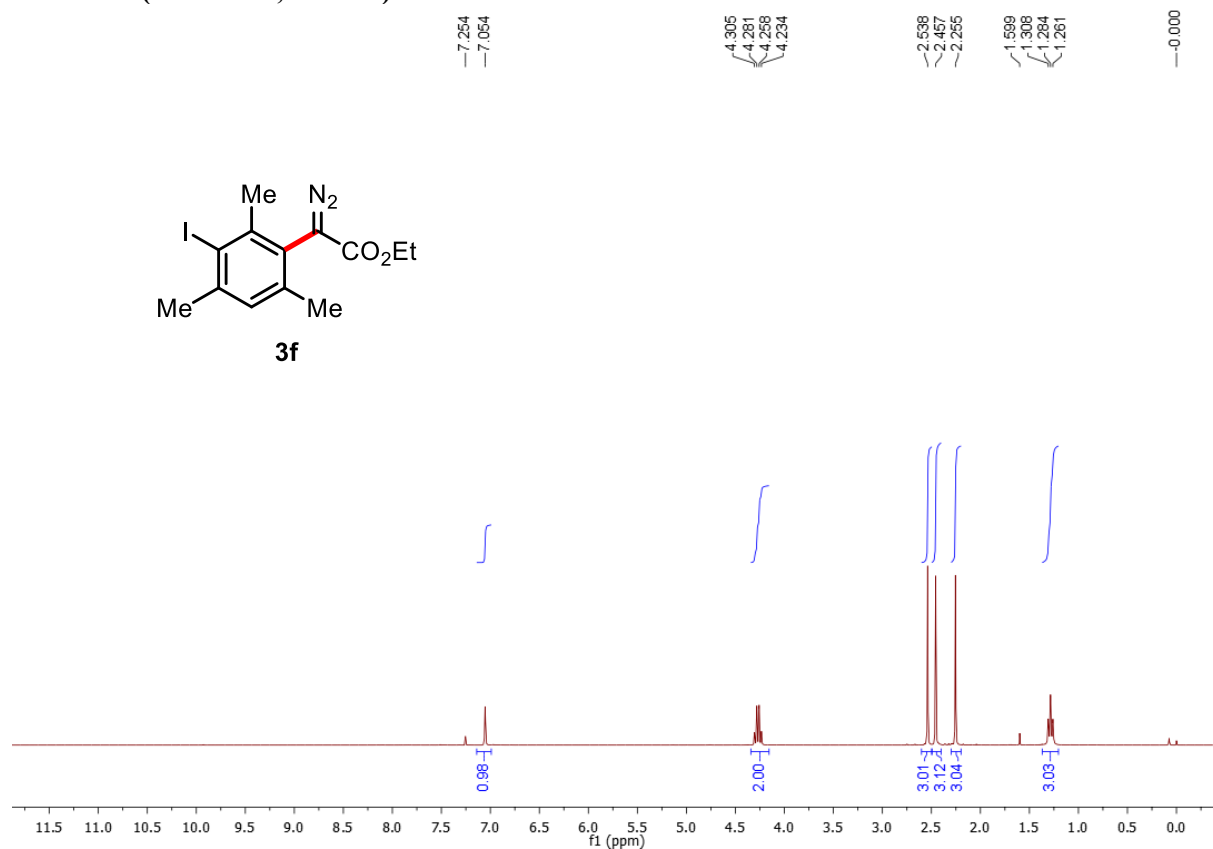

### <sup>13</sup>C NMR (100 MHz, CDCl<sub>3</sub>)

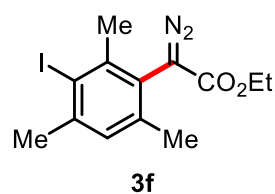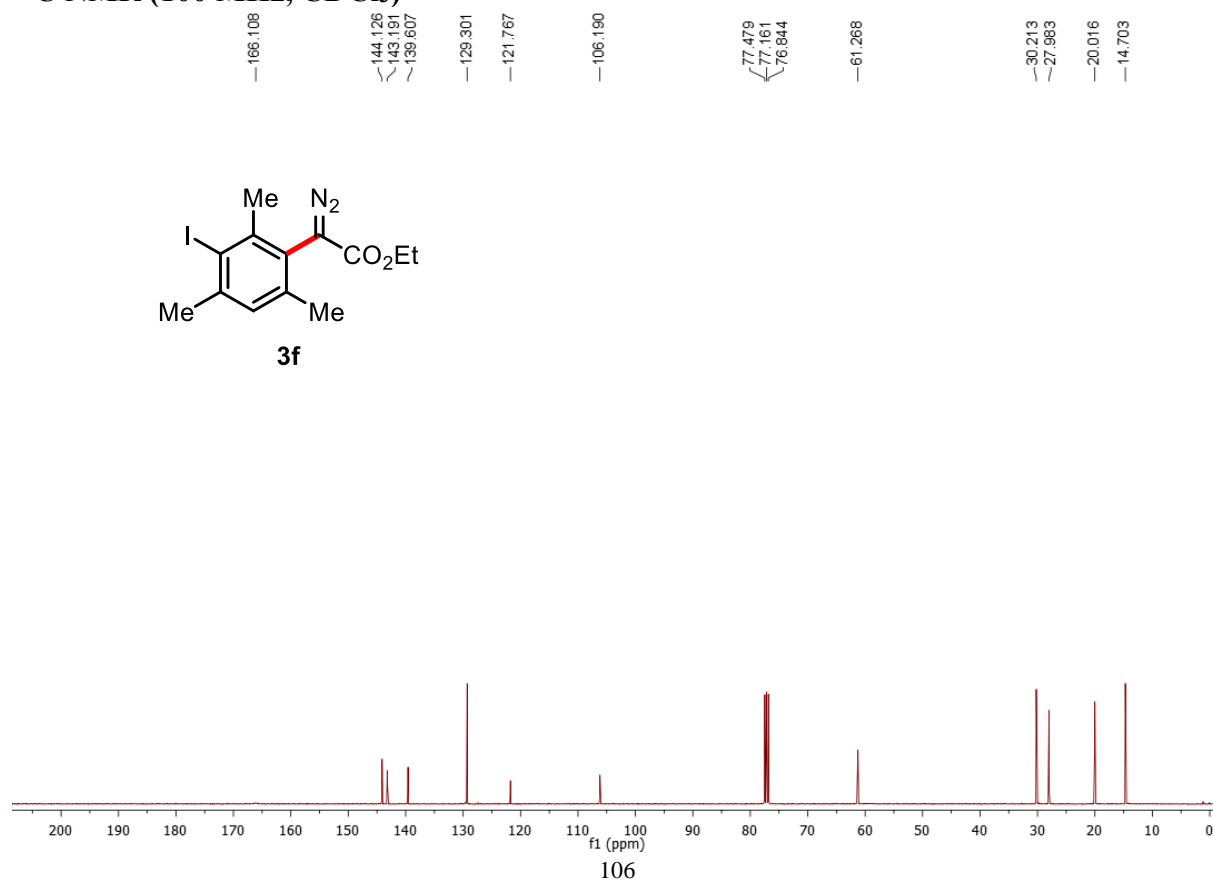

# <sup>1</sup>H NMR (300 MHz, CDCl<sub>3</sub>)

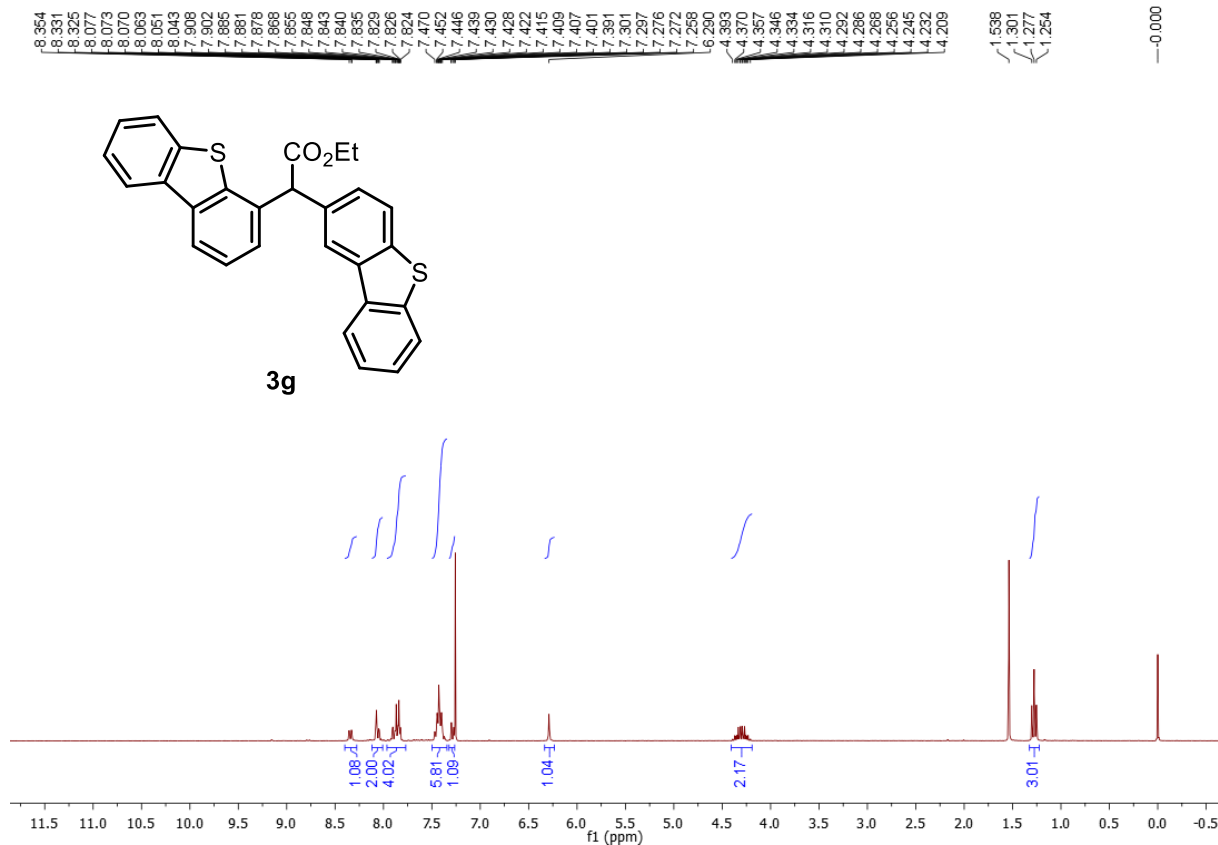

# <sup>13</sup>C NMR (100 MHz, CDCl<sub>3</sub>)

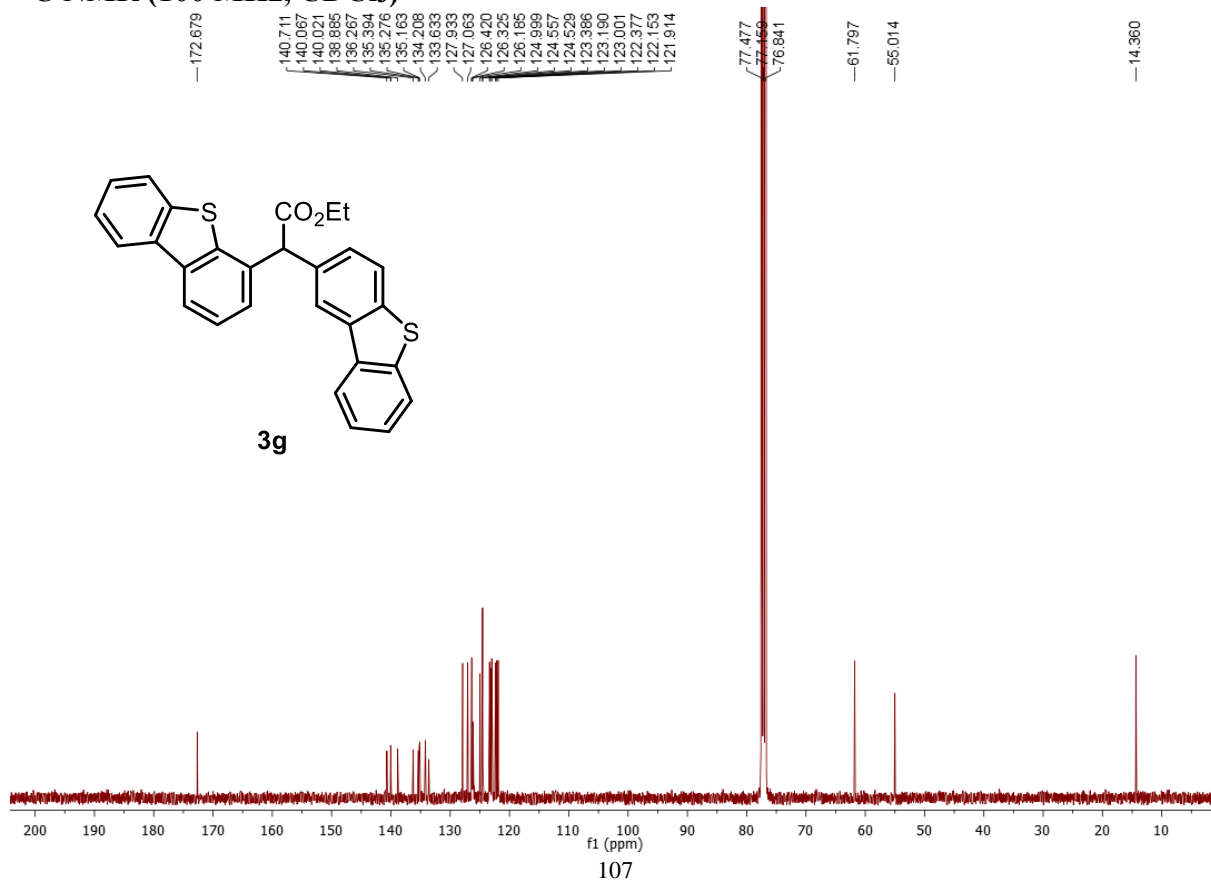



**<sup>1</sup>H NMR (300 MHz, CDCl<sub>3</sub>)**

7.513, 7.508, 7.489, 7.484, 7.480, 7.319, 7.312, 7.307, 7.289, 7.281, 7.268, 7.266, 7.261, 7.256, 7.250, 7.247, 7.239, 7.236, 7.204, 7.179, 7.169, -4.516, -1.527, -0.000

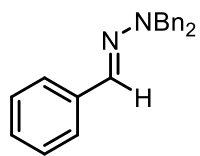

**4a**

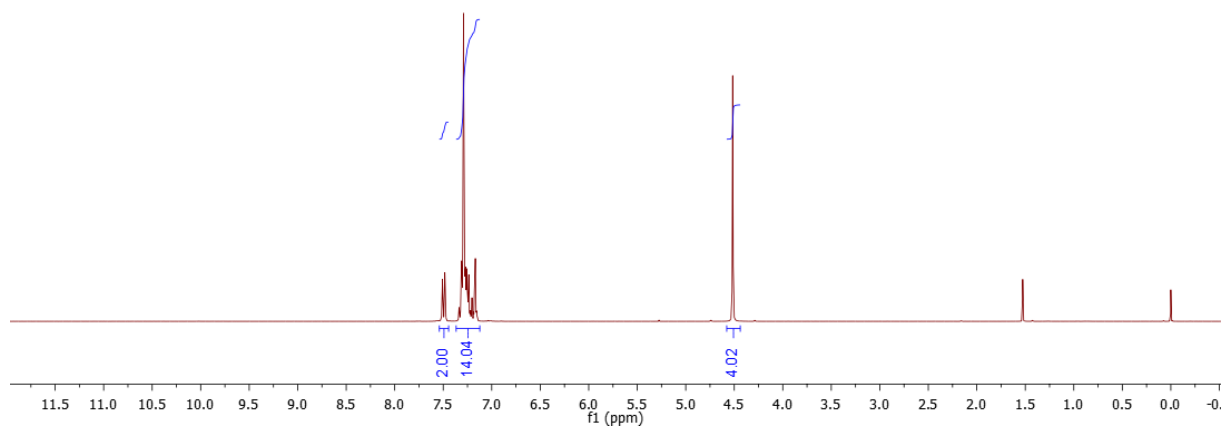

**<sup>13</sup>C NMR (75 MHz, CDCl<sub>3</sub>)**

137.68, 137.107, 131.957, 128.689, 128.547, 127.791, 127.319, 125.700, 77.583, 77.158, 76.735, -58.036

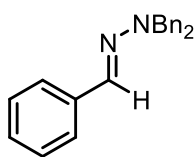

**4a**

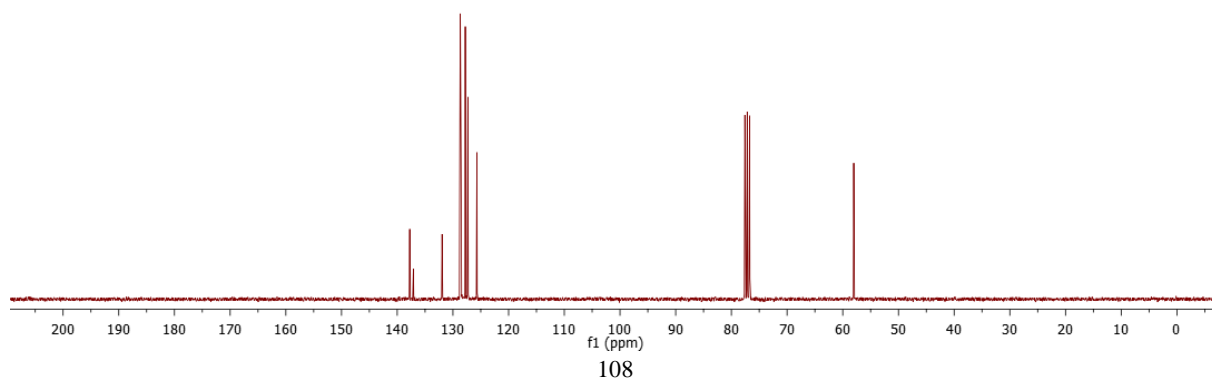

# <sup>1</sup>H NMR (300 MHz, CDCl<sub>3</sub>)

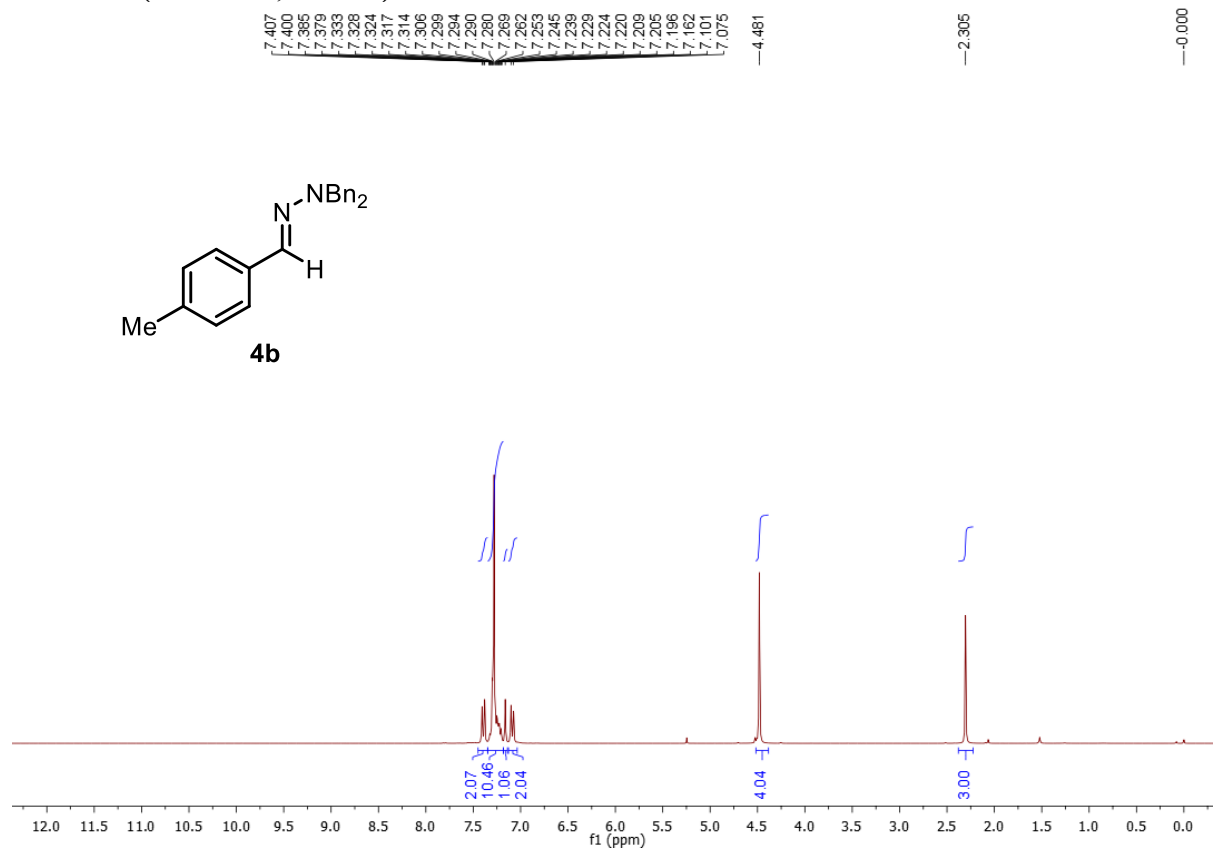

# <sup>13</sup>C NMR (75 MHz, CDCl<sub>3</sub>)

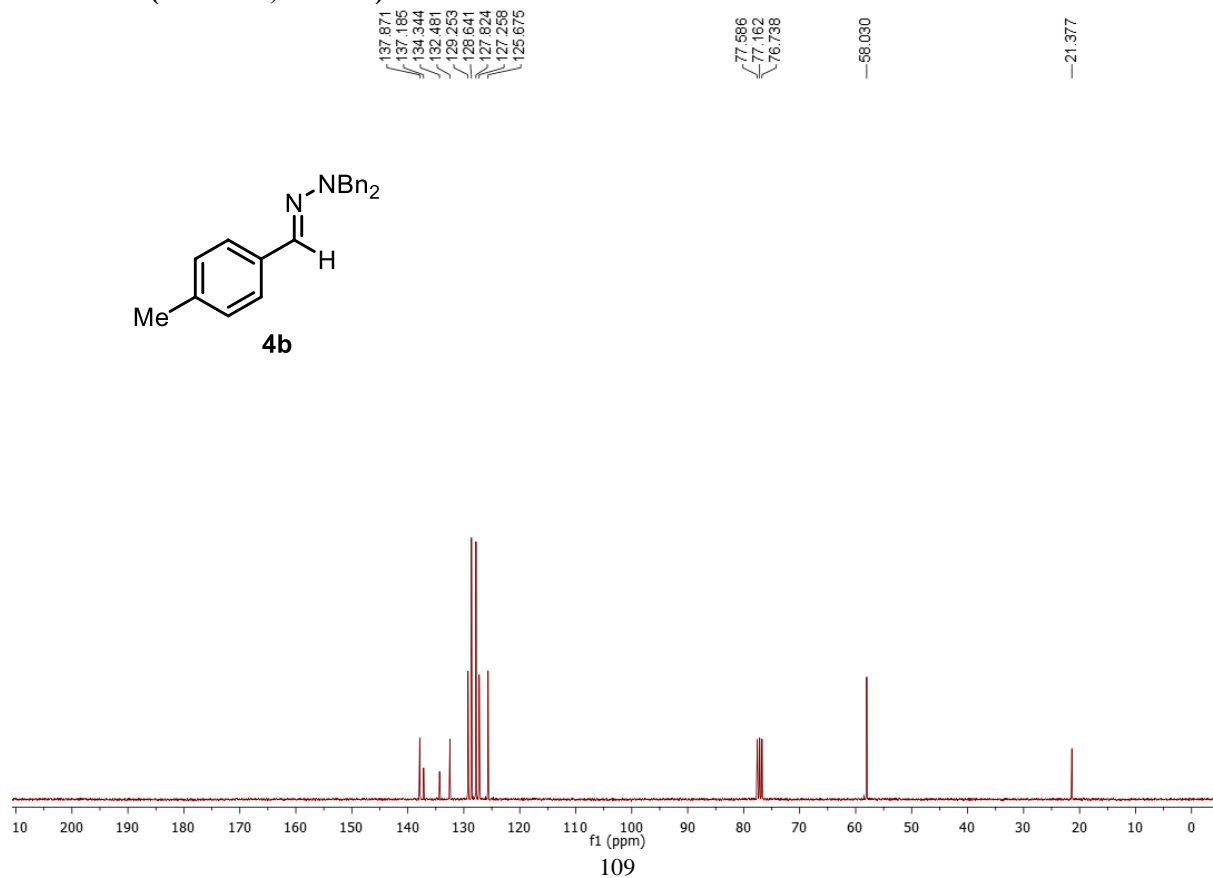

# <sup>1</sup>H NMR (300 MHz, CDCl<sub>3</sub>)

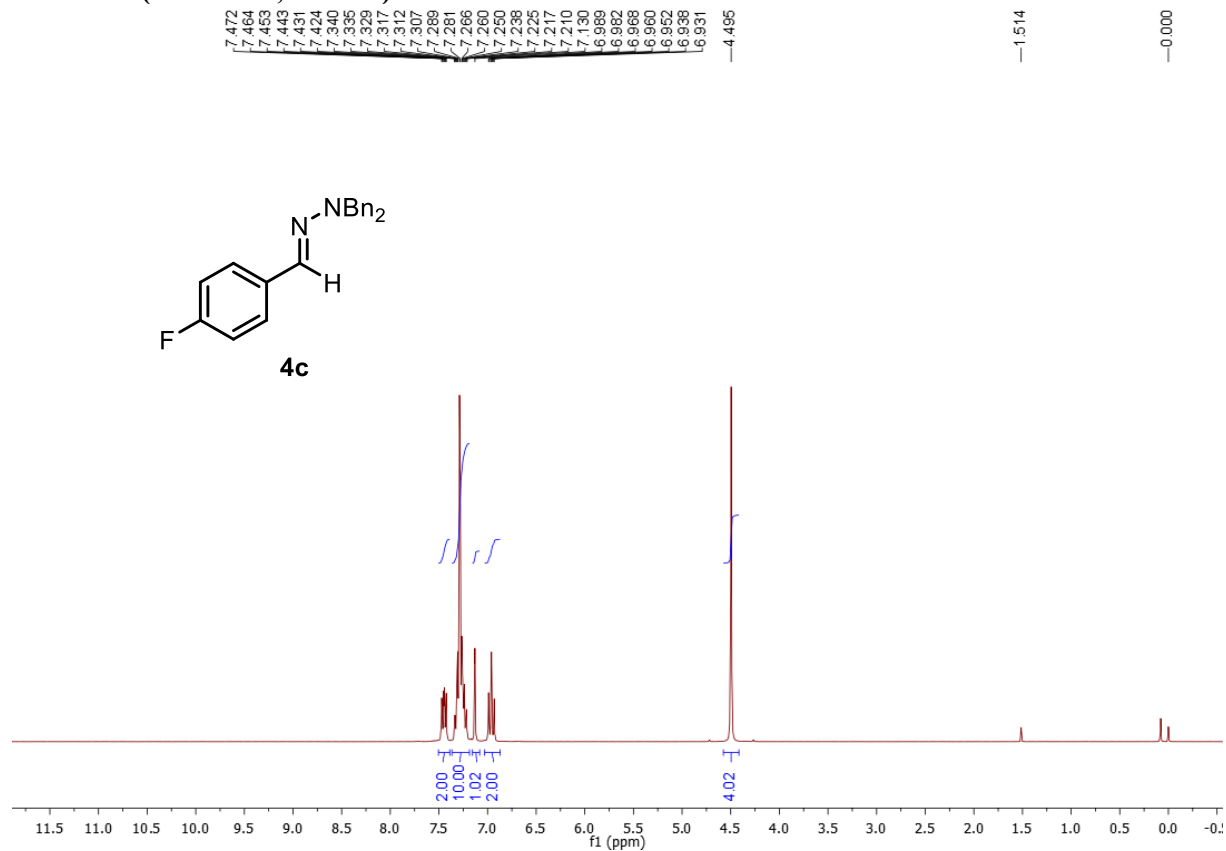

# <sup>13</sup>C NMR (75 MHz, CDCl<sub>3</sub>)

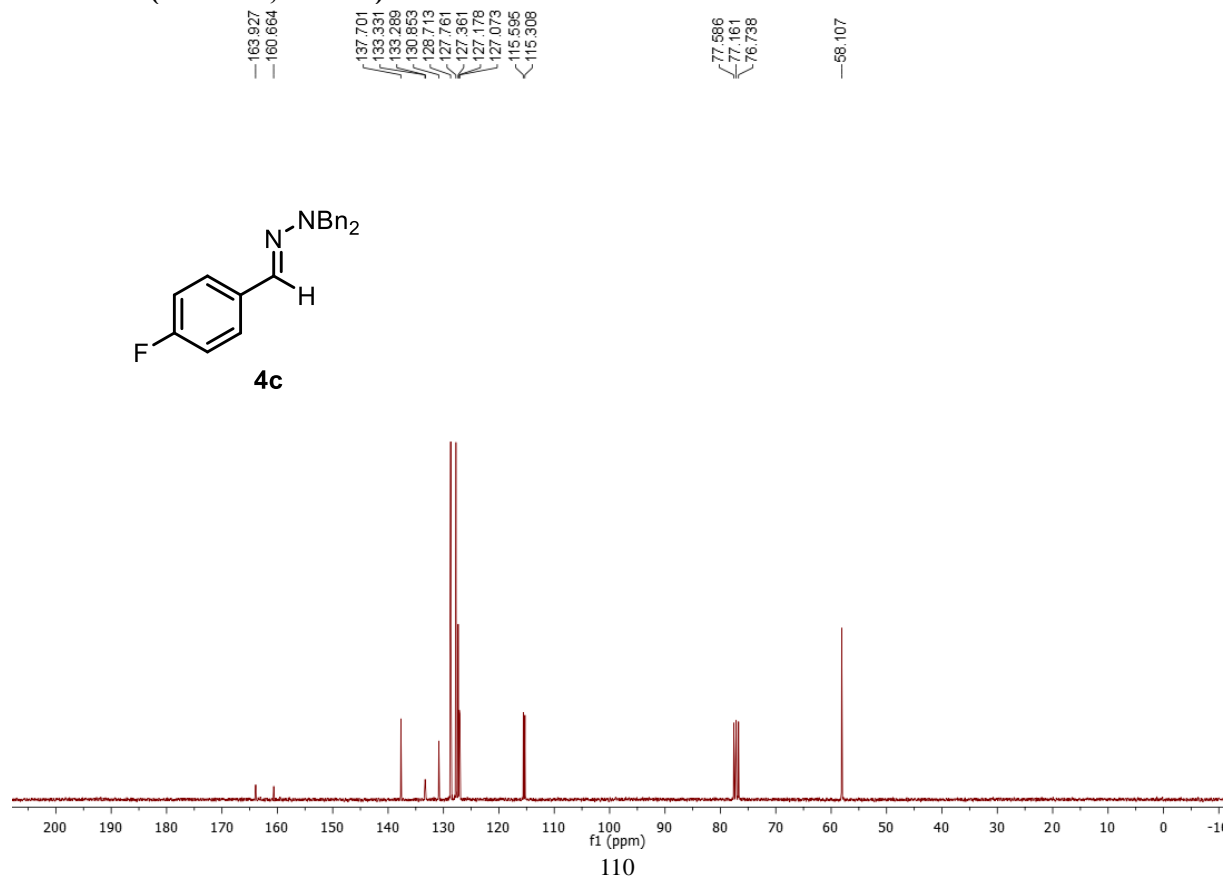

### <sup>1</sup>H NMR (300 MHz, CDCl<sub>3</sub>)

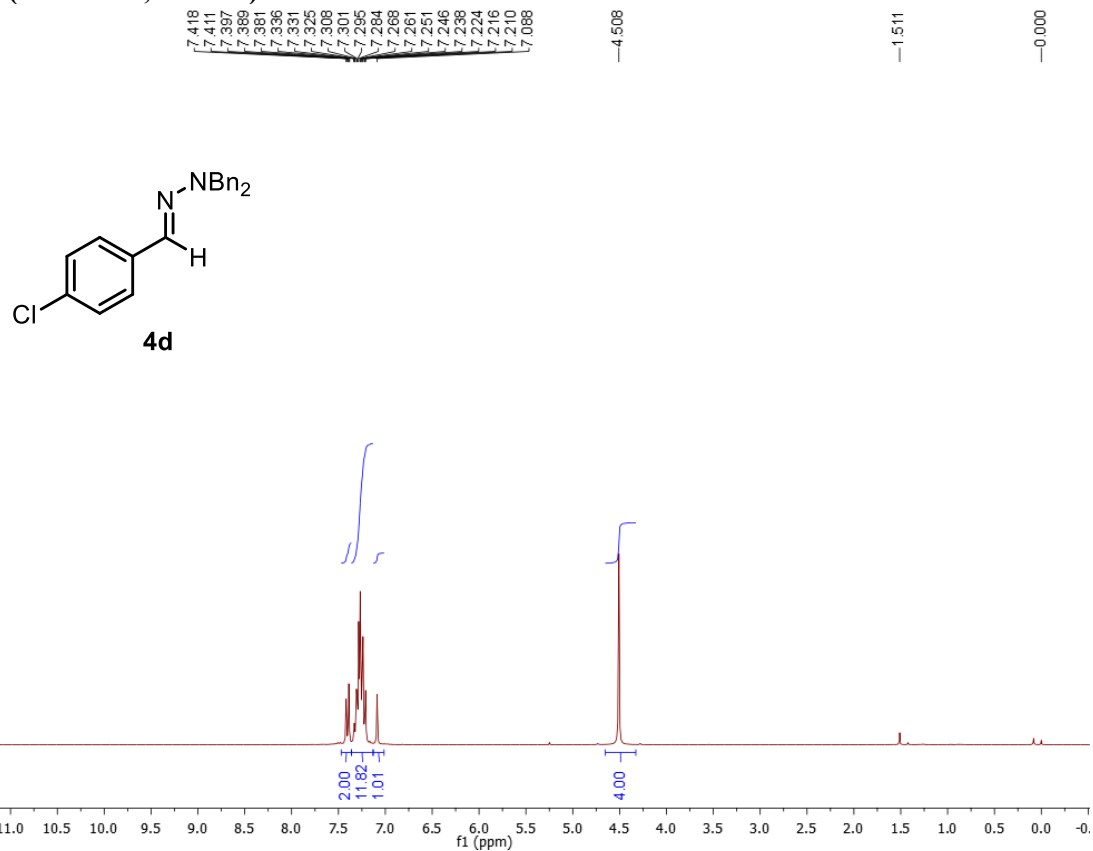

### <sup>13</sup>C NMR (75 MHz, CDCl<sub>3</sub>)

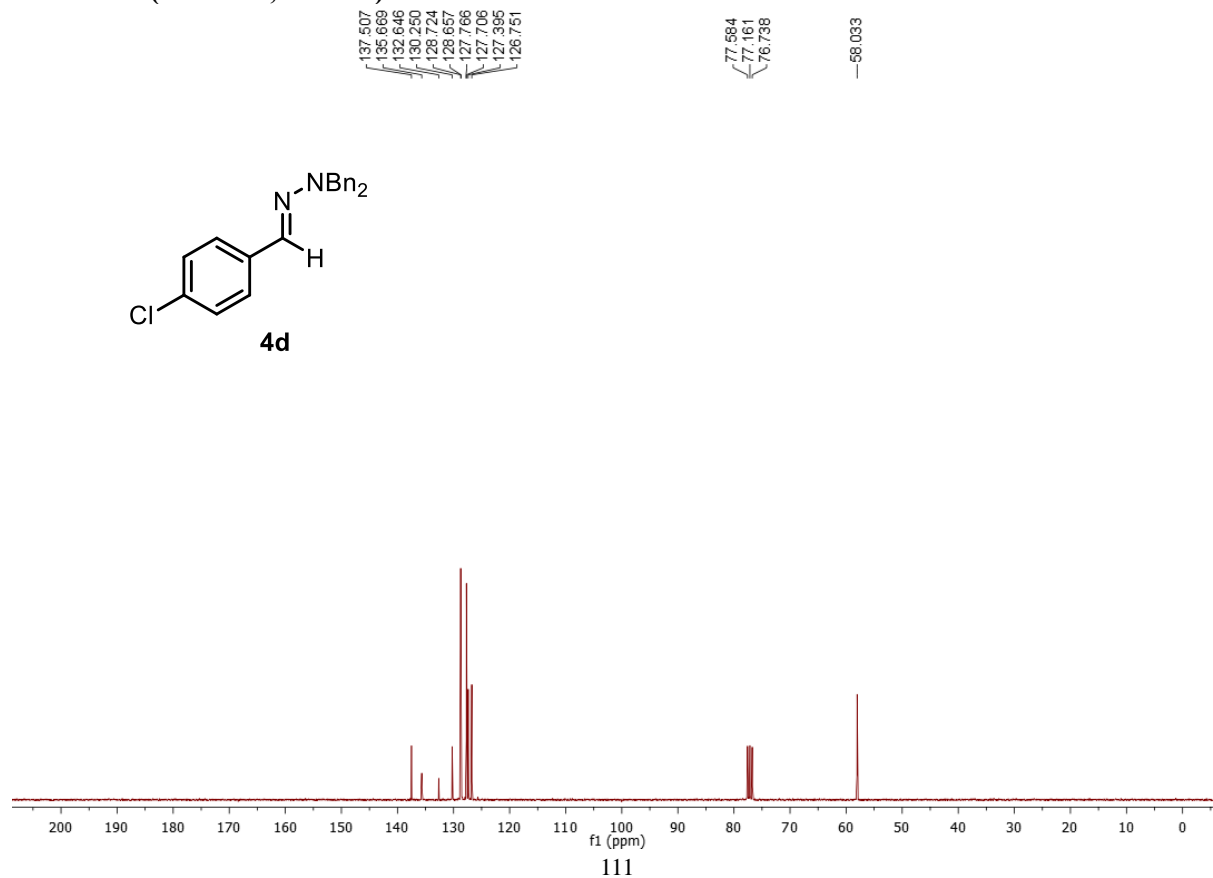

**<sup>1</sup>H NMR (300 MHz, CDCl<sub>3</sub>)**

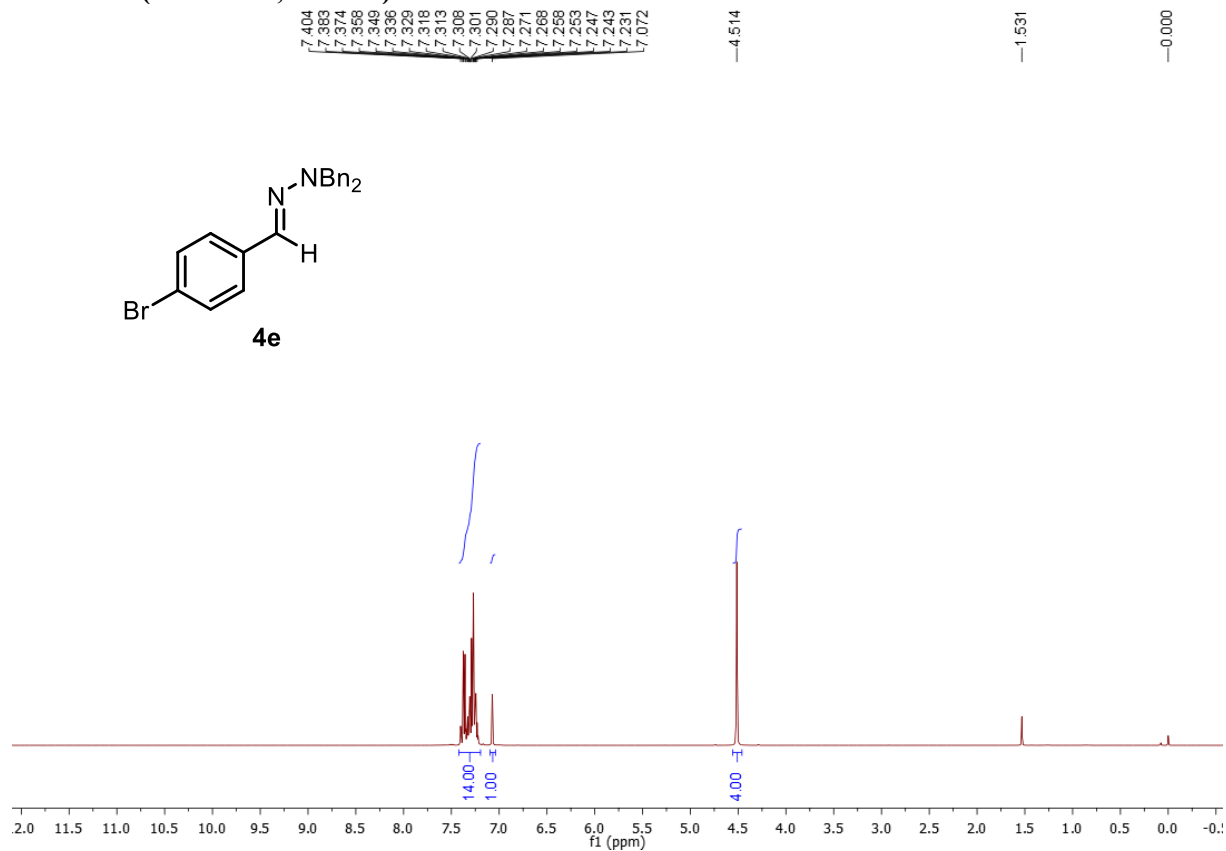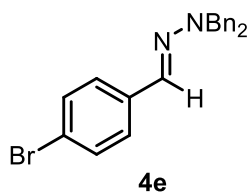

**<sup>13</sup>C NMR (75 MHz, CDCl<sub>3</sub>)**

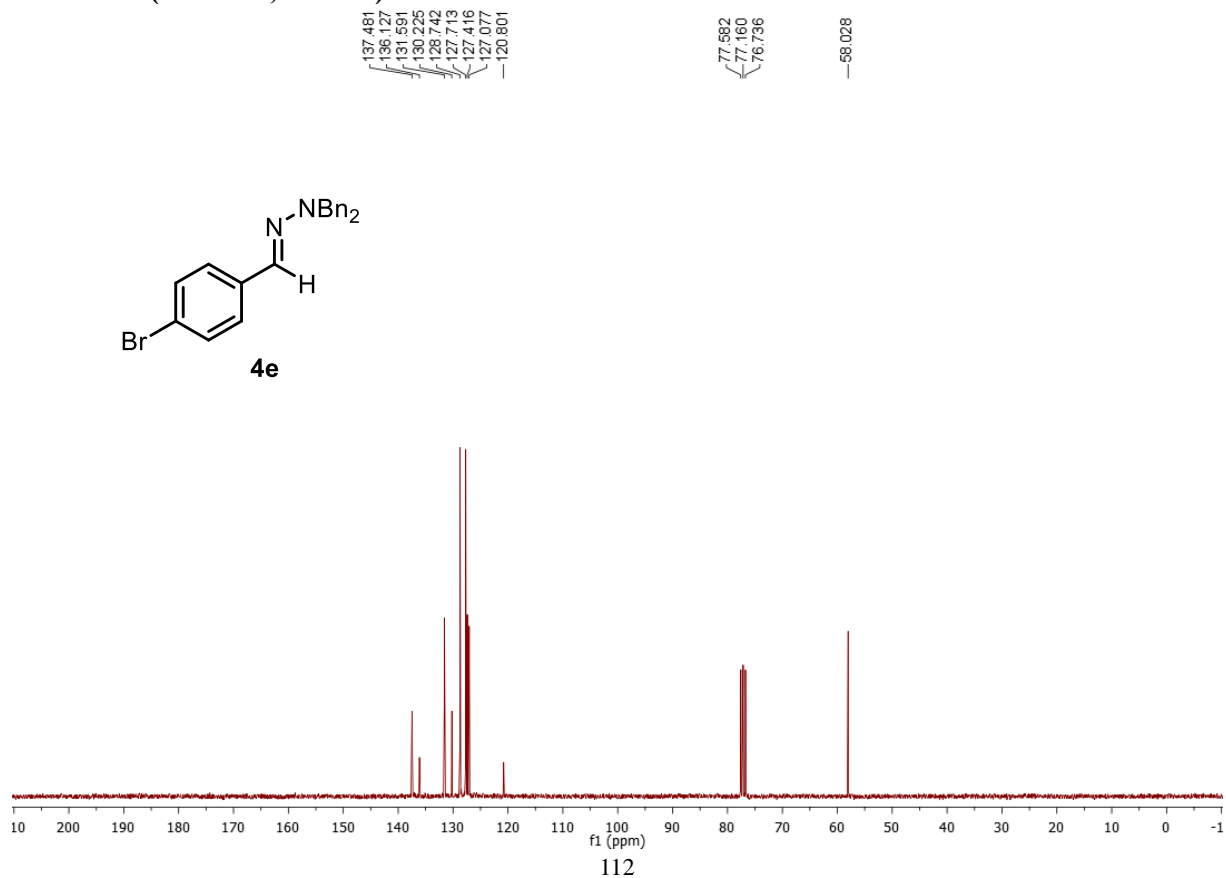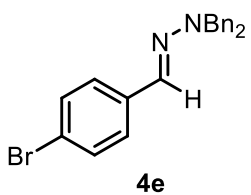

# <sup>1</sup>H NMR (300 MHz, CDCl<sub>3</sub>)

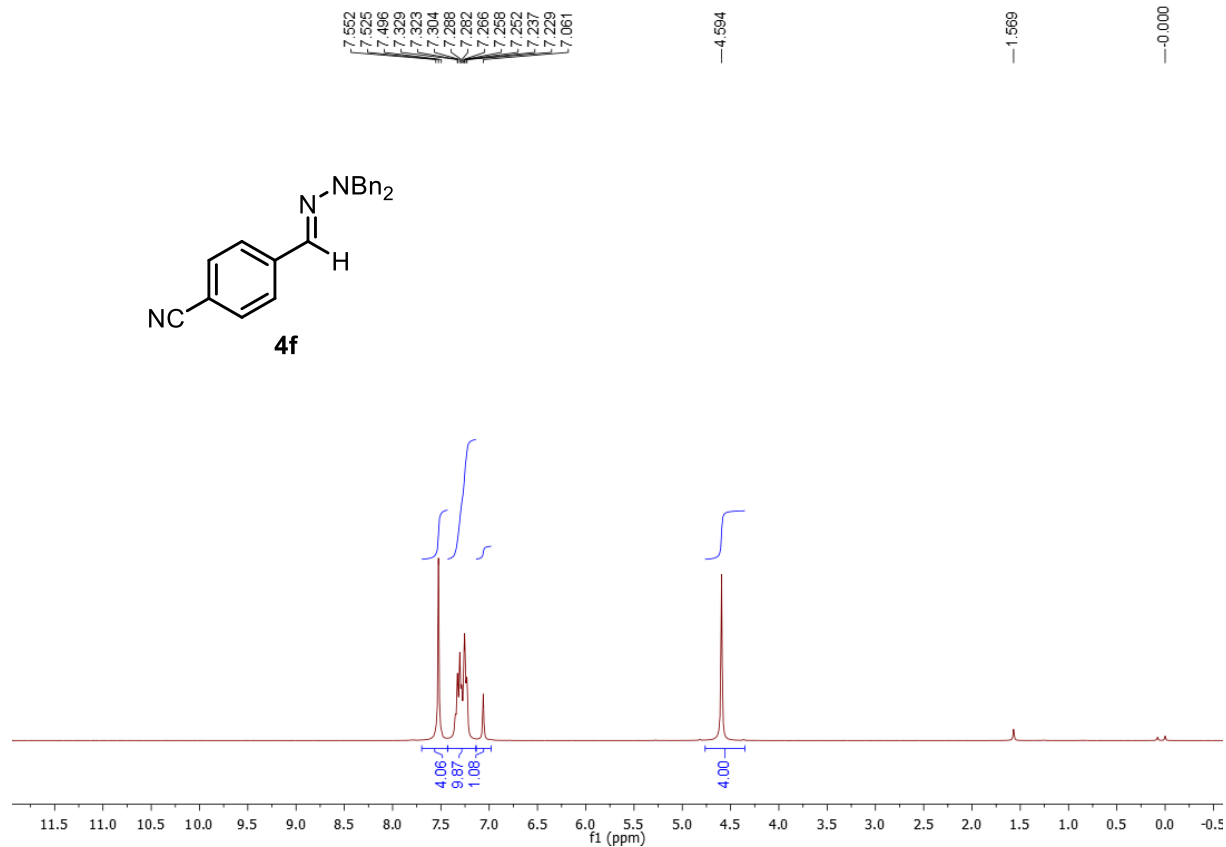

# <sup>13</sup>C NMR (75 MHz, CDCl<sub>3</sub>)

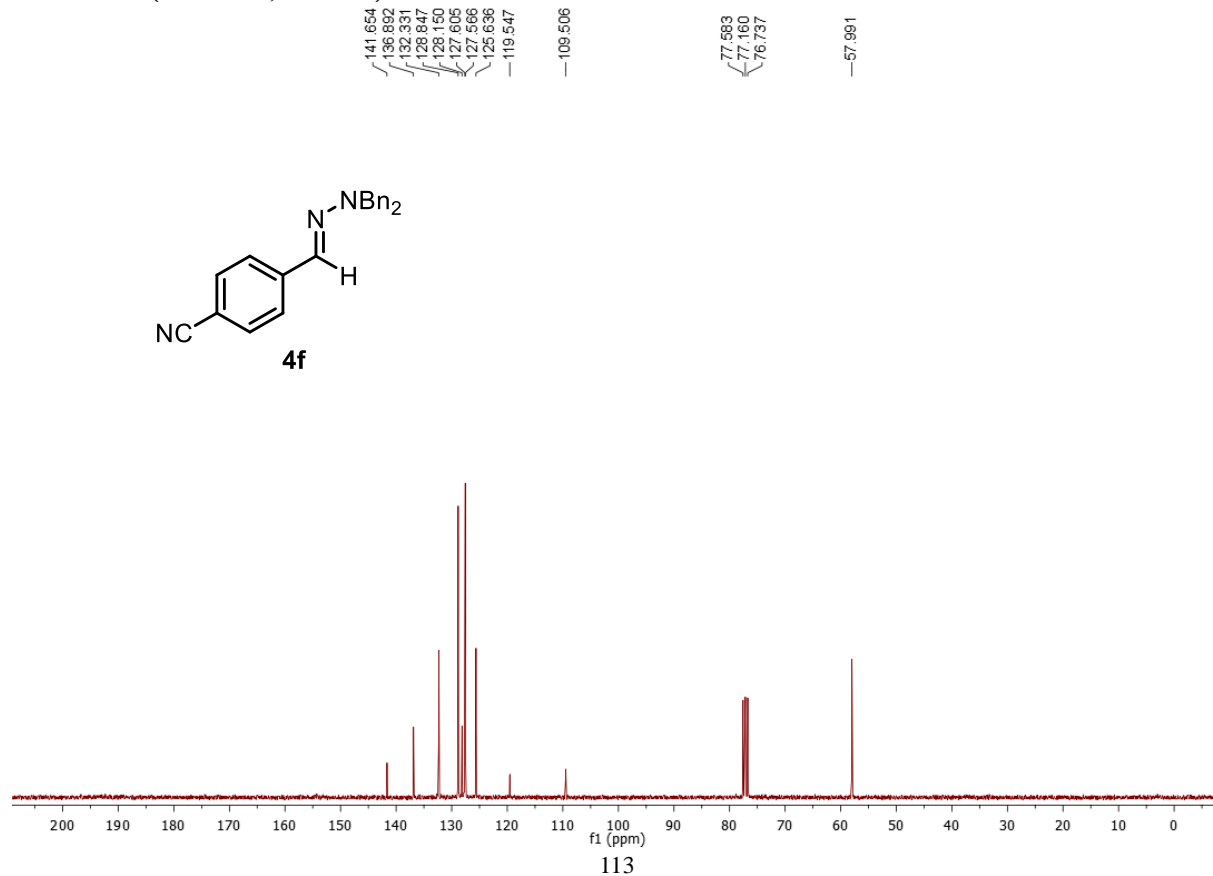

# <sup>1</sup>H NMR (300 MHz, CDCl<sub>3</sub>)

7.595  
7.590  
7.584  
7.571  
7.566  
7.563  
7.556  
7.537  
7.529  
7.516  
7.508  
7.437  
7.433  
7.409  
7.403  
7.388  
7.383  
7.341  
7.335  
7.330  
7.324  
7.317  
7.312  
7.304  
7.295  
7.281  
7.276  
7.271  
7.264  
7.259  
7.254  
7.249  
7.242  
7.214  
7.196  
-4.535

-1.516

-0.000

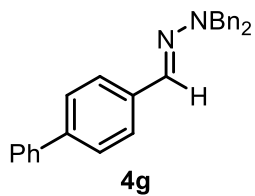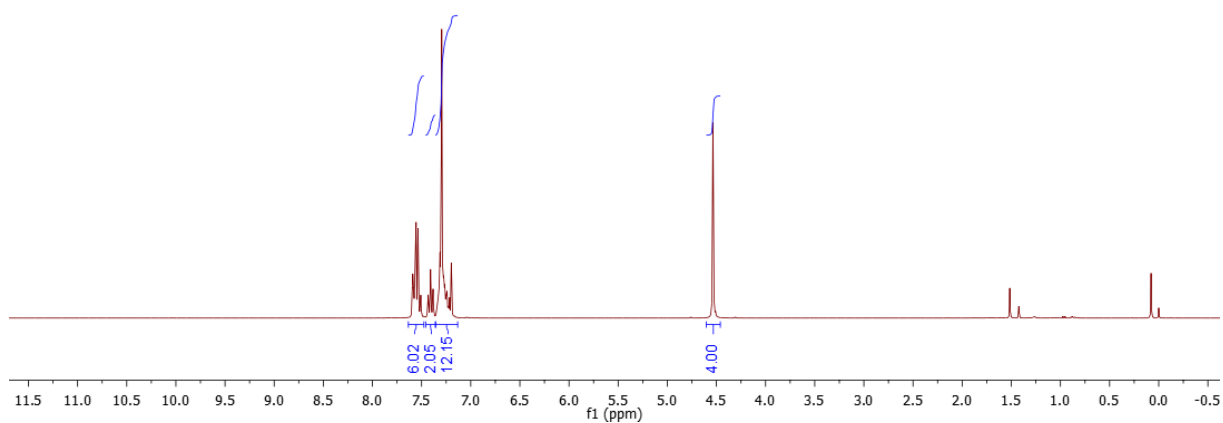

# <sup>13</sup>C NMR (75 MHz, CDCl<sub>3</sub>)

141.038  
139.955  
137.710  
136.218  
131.420  
128.874  
128.708  
127.777  
127.345  
127.280  
127.018  
126.067

77.581  
77.168  
76.733

-58.034

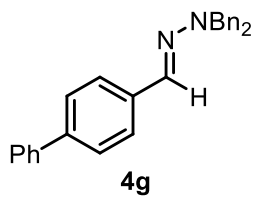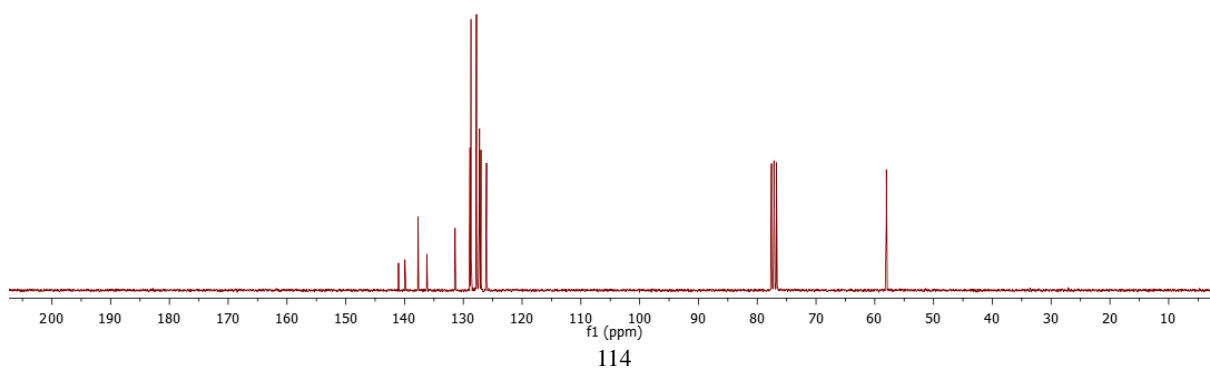

# <sup>1</sup>H NMR (300 MHz, CDCl<sub>3</sub>)

7.459, 7.449, 7.443, 7.427, 7.420, 7.410, 7.339, 7.335, 7.329, 7.316, 7.310, 7.306, 7.303, 7.292, 7.281, 7.277, 7.274, 7.262, 7.254, 7.248, 7.241, 7.234, 7.228, 7.218, 7.215, 7.205, 7.189, 6.856, 6.847, 6.840, 6.824, 6.817, 6.807, 4.467, -3.787, -1.545, -0.000

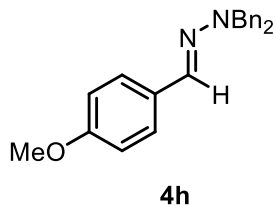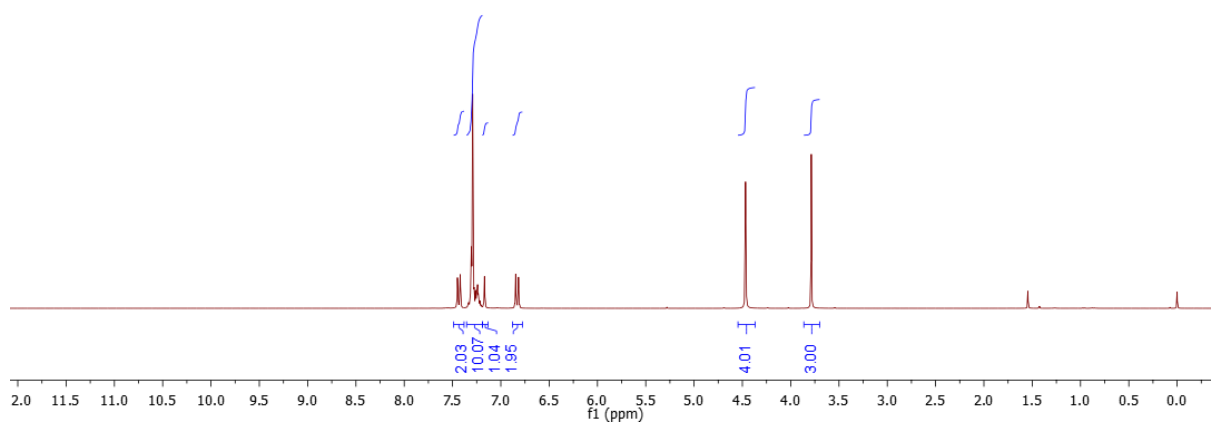

# <sup>13</sup>C NMR (75 MHz, CDCl<sub>3</sub>)

159.294, 137.986, 132.588, 130.011, 128.642, 127.872, 127.248, 127.002, 114.045, 77.585, 77.162, 76.738, 58.161, 55.445

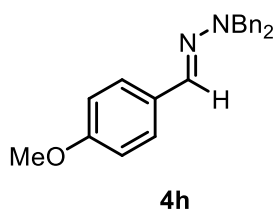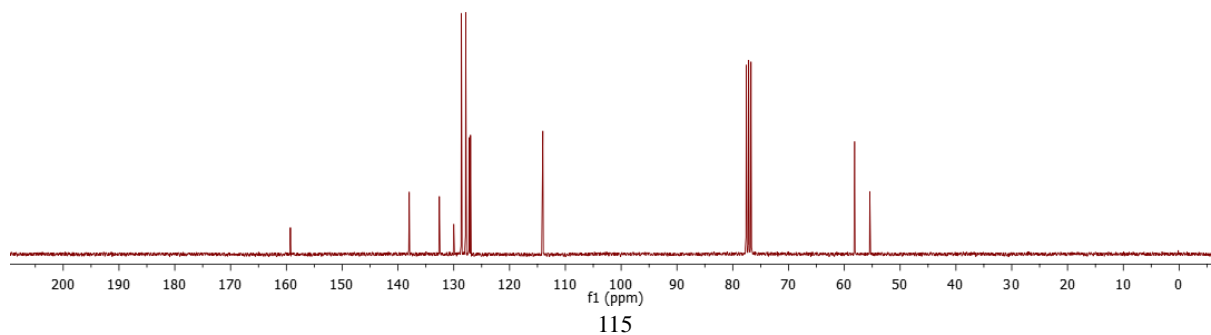



**<sup>1</sup>H NMR (300 MHz, CDCl<sub>3</sub>)**

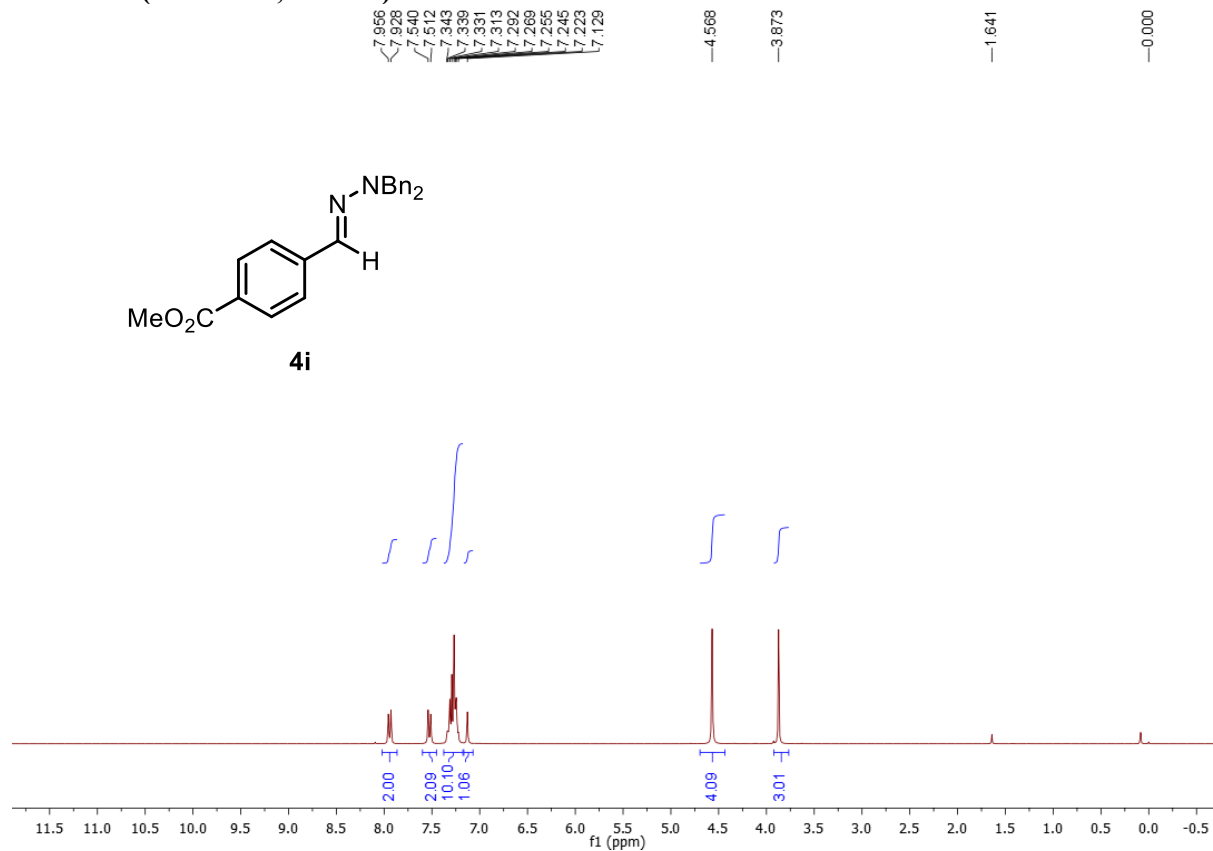

**<sup>13</sup>C NMR (75 MHz, CDCl<sub>3</sub>)**

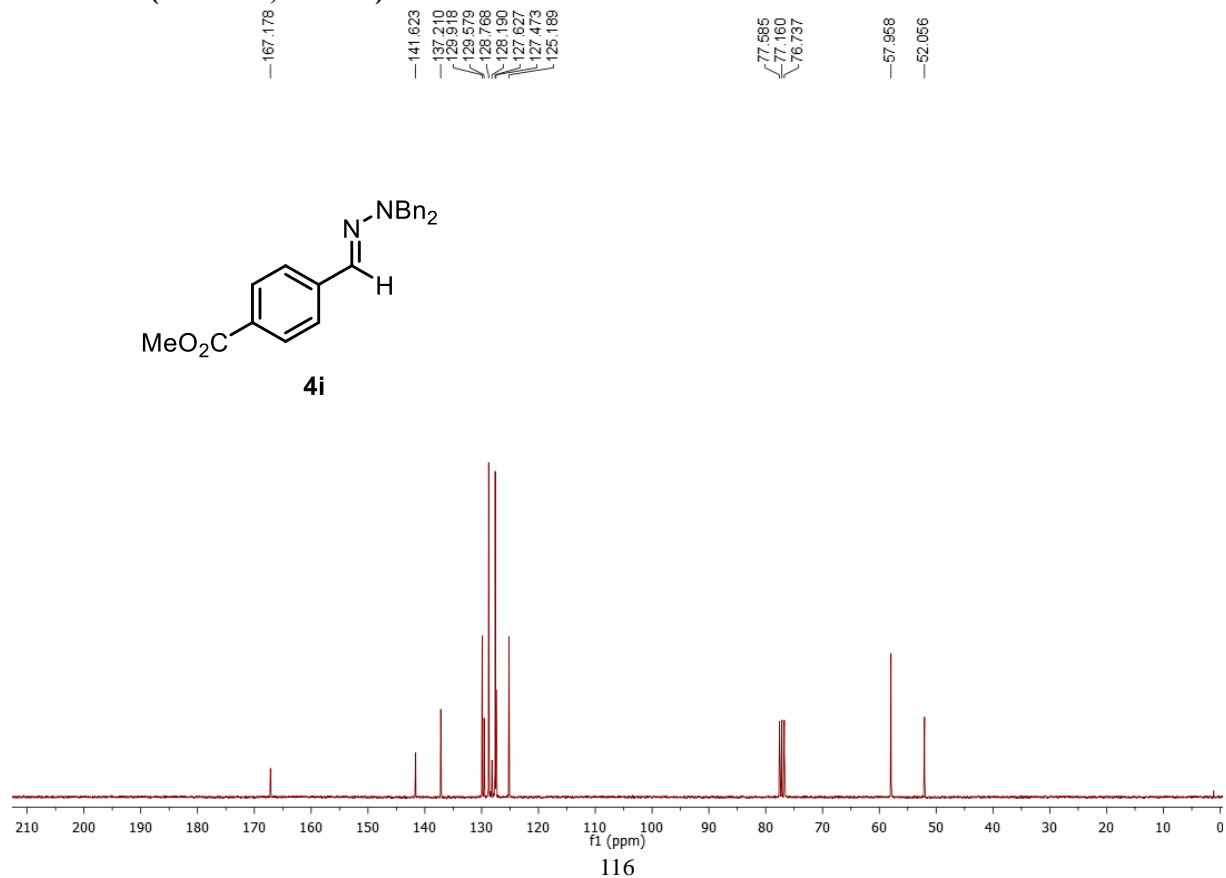

# <sup>1</sup>H NMR (300 MHz, CDCl<sub>3</sub>)

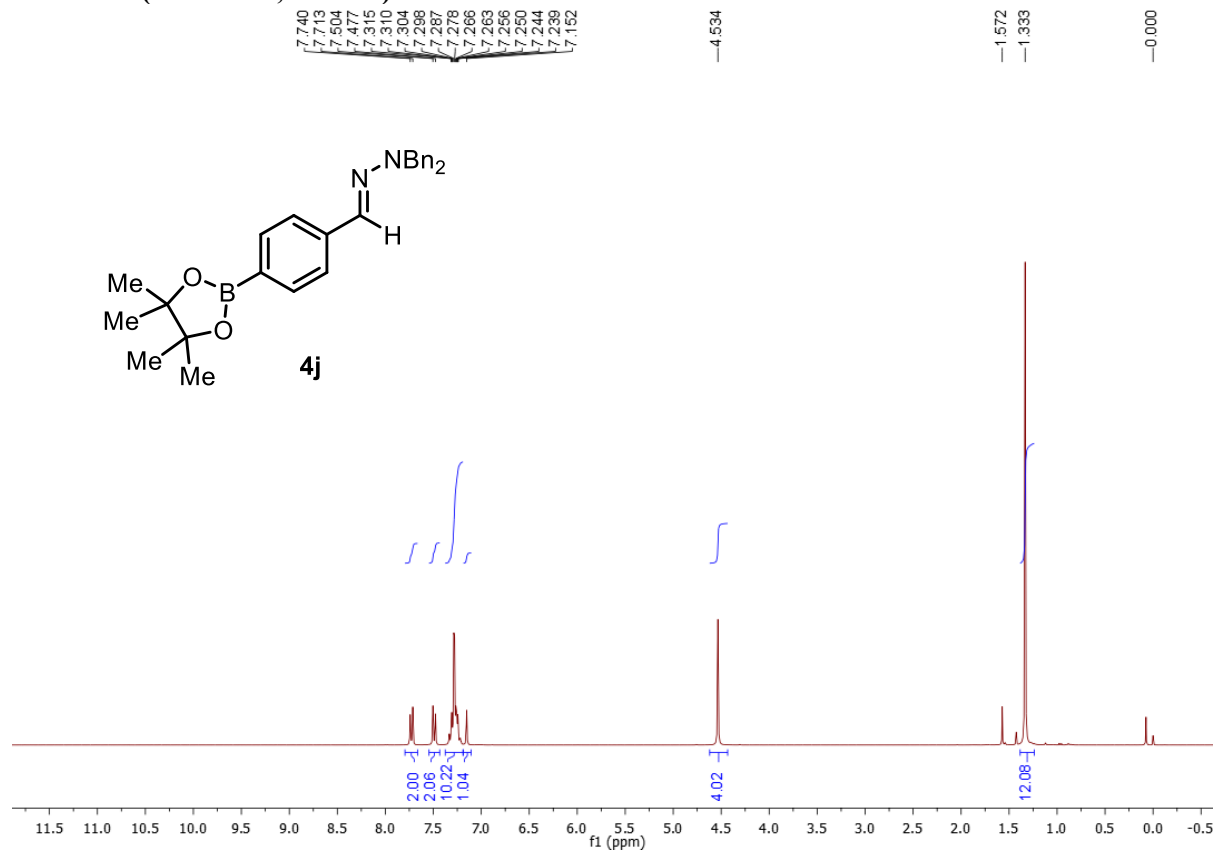

# <sup>13</sup>C NMR (75 MHz, CDCl<sub>3</sub>)

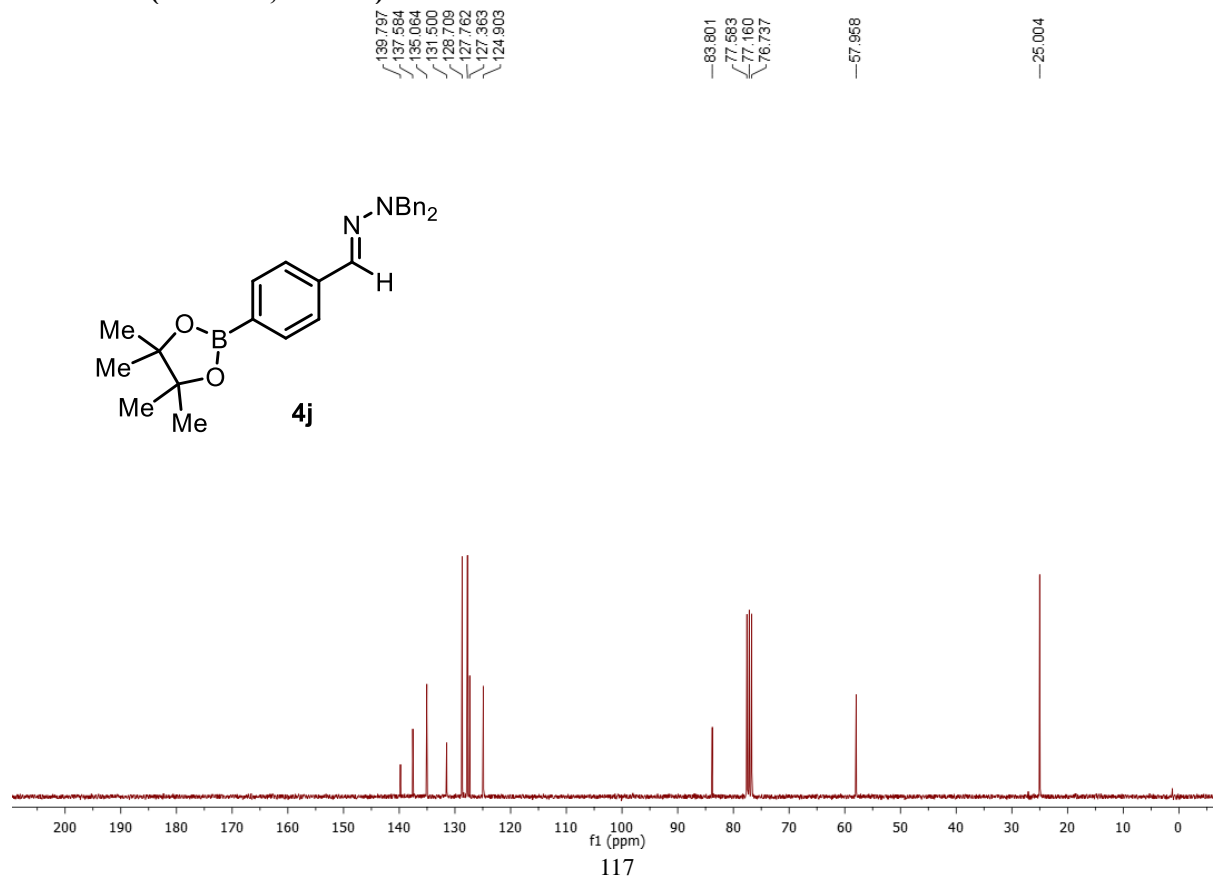

**<sup>1</sup>H NMR (300 MHz, CDCl<sub>3</sub>)**

7.341  
7.336  
7.330  
7.313  
7.307  
7.289  
7.271  
7.254  
7.249  
7.242  
7.228  
7.220  
7.213  
7.195  
7.188  
7.170  
7.149  
7.145  
7.087  
6.881  
6.875  
6.868  
6.853  
6.845  
6.838  
6.829  
6.821  
6.813  
—4.526

—1.501

—0.000

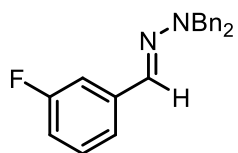

**4k**

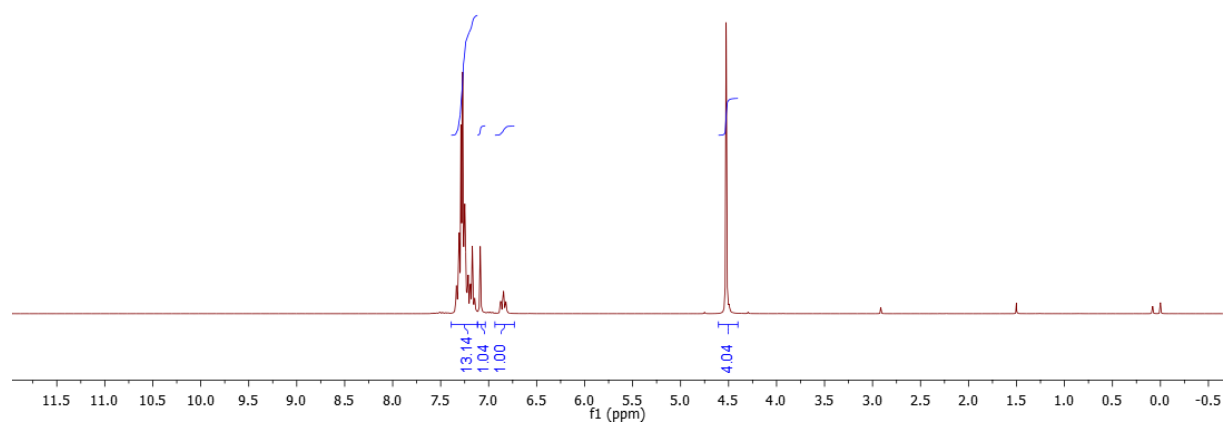

**<sup>13</sup>C NMR (75 MHz, CDCl<sub>3</sub>)**

—164.963  
—161.715  
139.688  
139.562  
137.435  
130.018  
129.976  
129.954  
129.842  
128.754  
127.704  
127.432  
121.628  
121.594  
114.059  
113.772  
111.765  
111.467  
77.584  
77.161  
76.738  
—58.015

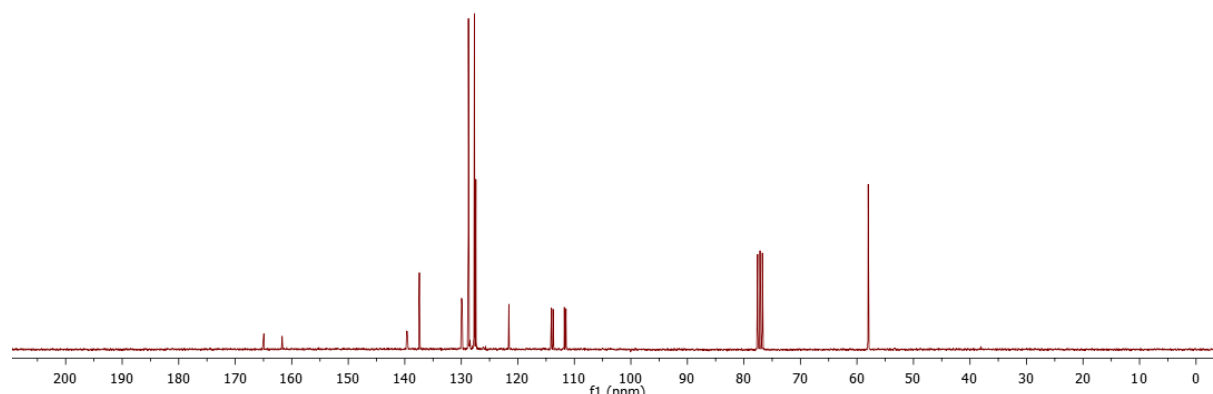

**<sup>1</sup>H NMR (300 MHz, CDCl<sub>3</sub>)**

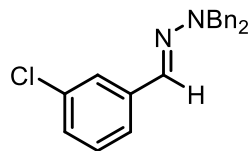

**41**

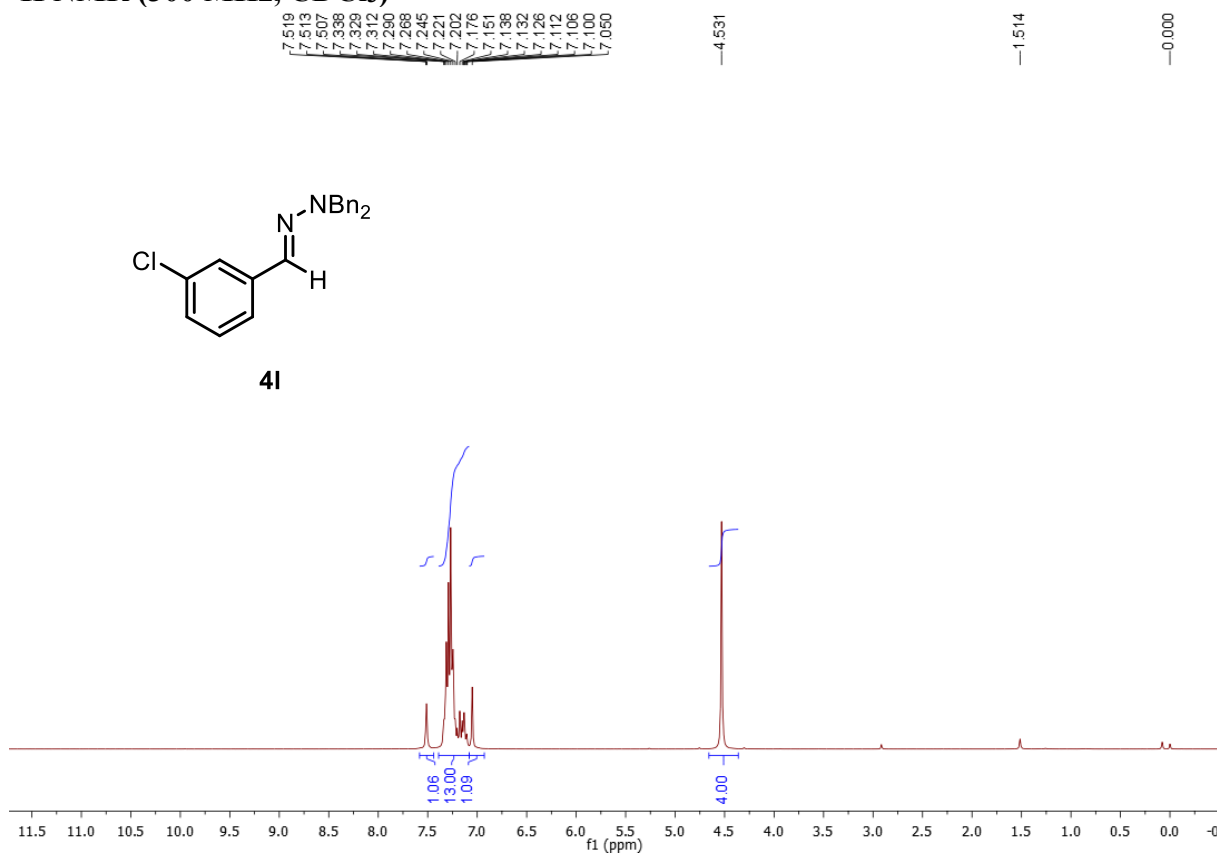

**<sup>13</sup>C NMR (75 MHz, CDCl<sub>3</sub>)**

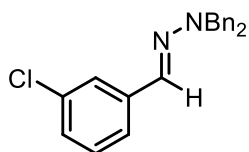

**41**

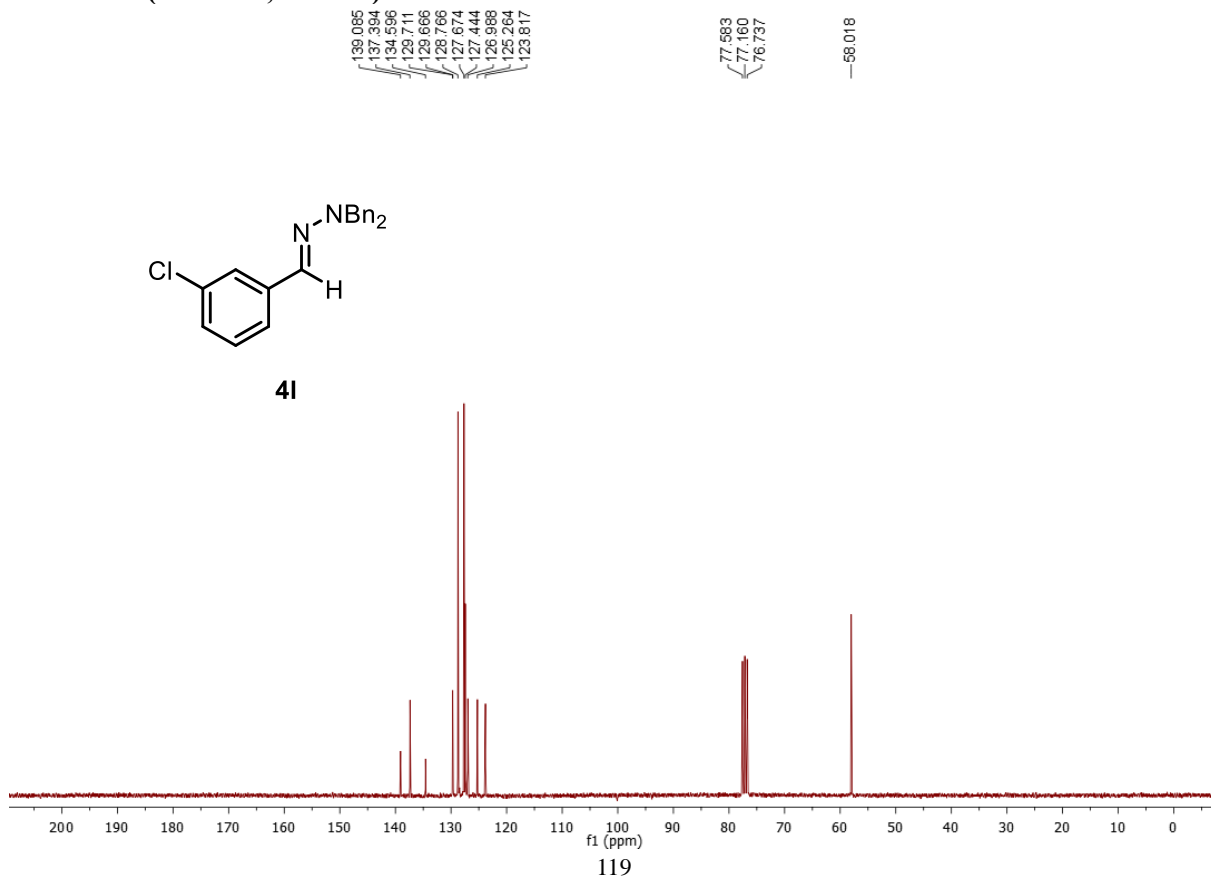

# <sup>1</sup>H NMR (300 MHz, CDCl<sub>3</sub>)

8.008  
8.002  
7.996  
7.781  
7.777  
7.771  
7.756  
7.751  
7.746  
7.730  
7.725  
7.720  
7.700  
7.675  
7.657  
7.652  
7.648  
7.633  
7.629  
7.623  
7.616  
7.605  
7.591  
7.582  
7.580  
7.569  
7.557  
7.554  
7.543  
7.535  
7.517  
—4.564  
—2.594  
—1.566  
—0.000

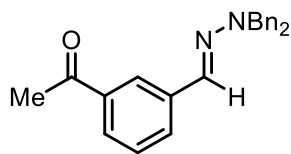

4m

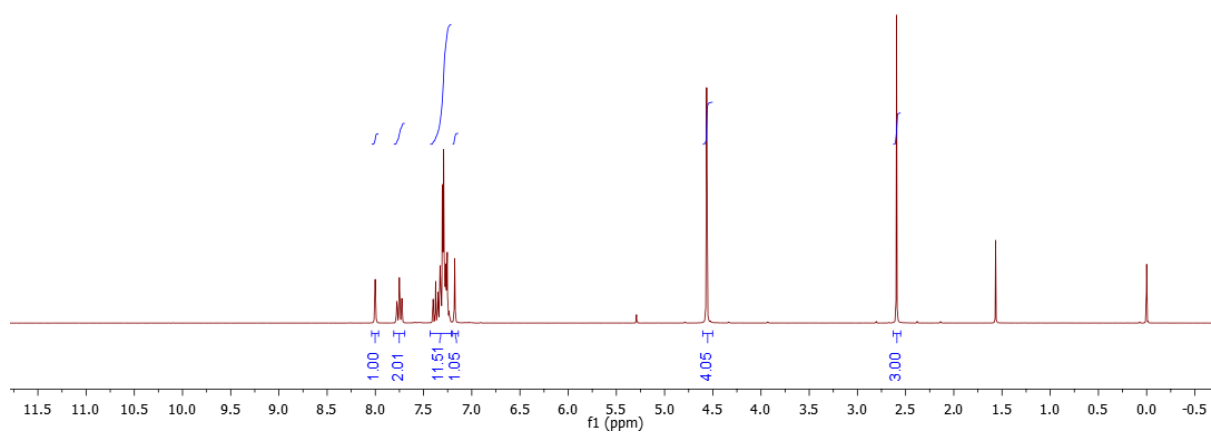

# <sup>13</sup>C NMR (75 MHz, CDCl<sub>3</sub>)

—198.492  
137.739  
137.496  
137.448  
130.215  
129.817  
128.761  
127.702  
126.466  
126.912  
125.603  
77.581  
77.158  
76.734  
—58.092  
—26.865

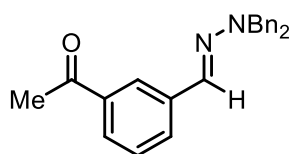

4m

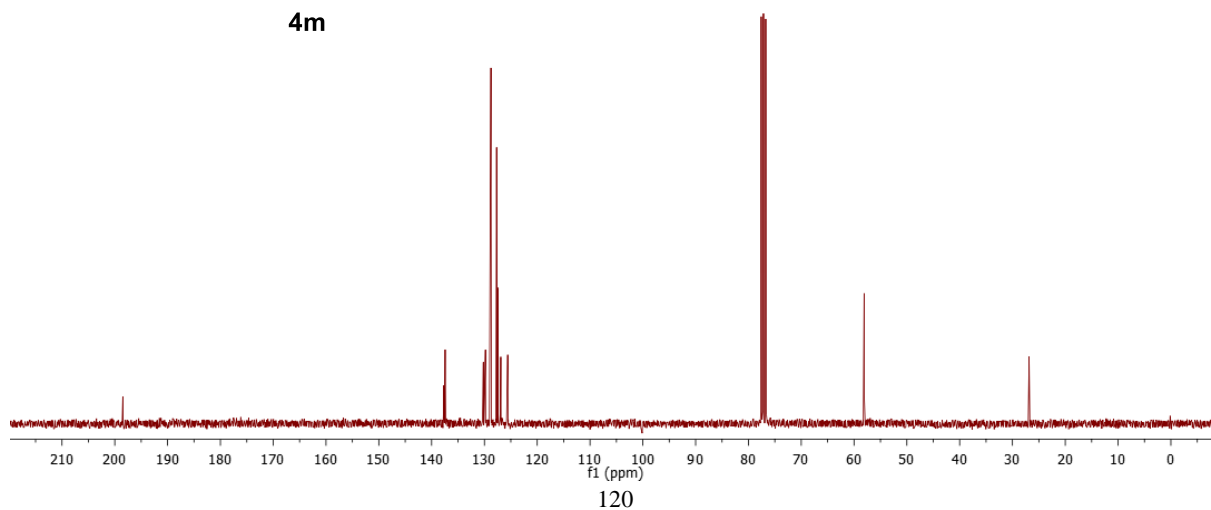

# <sup>1</sup>H NMR (300 MHz, CDCl<sub>3</sub>)

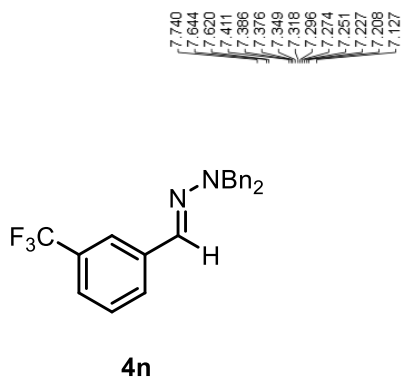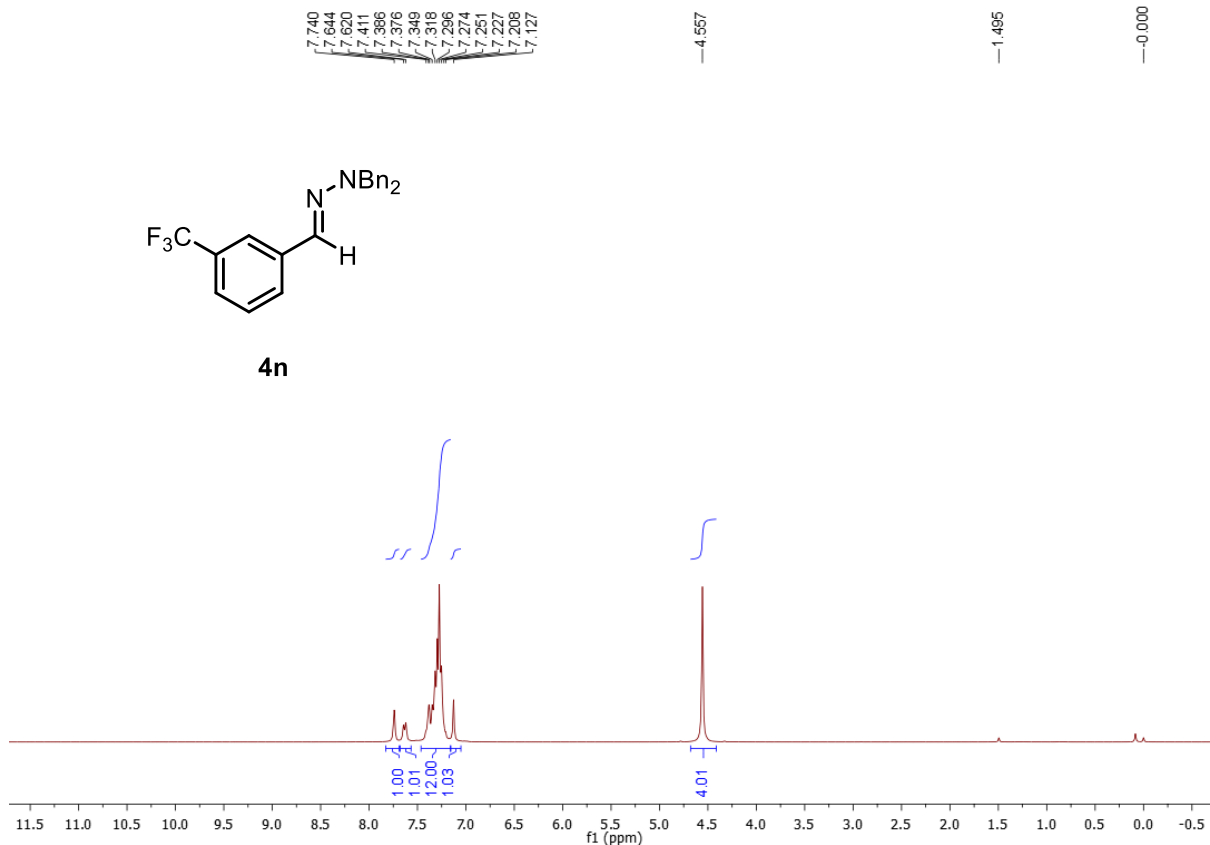

# <sup>13</sup>C NMR (75 MHz, CDCl<sub>3</sub>)

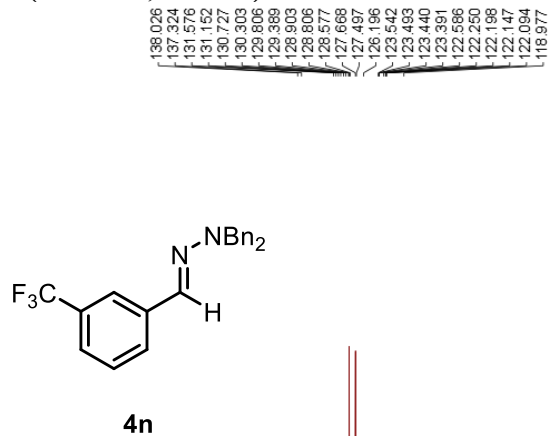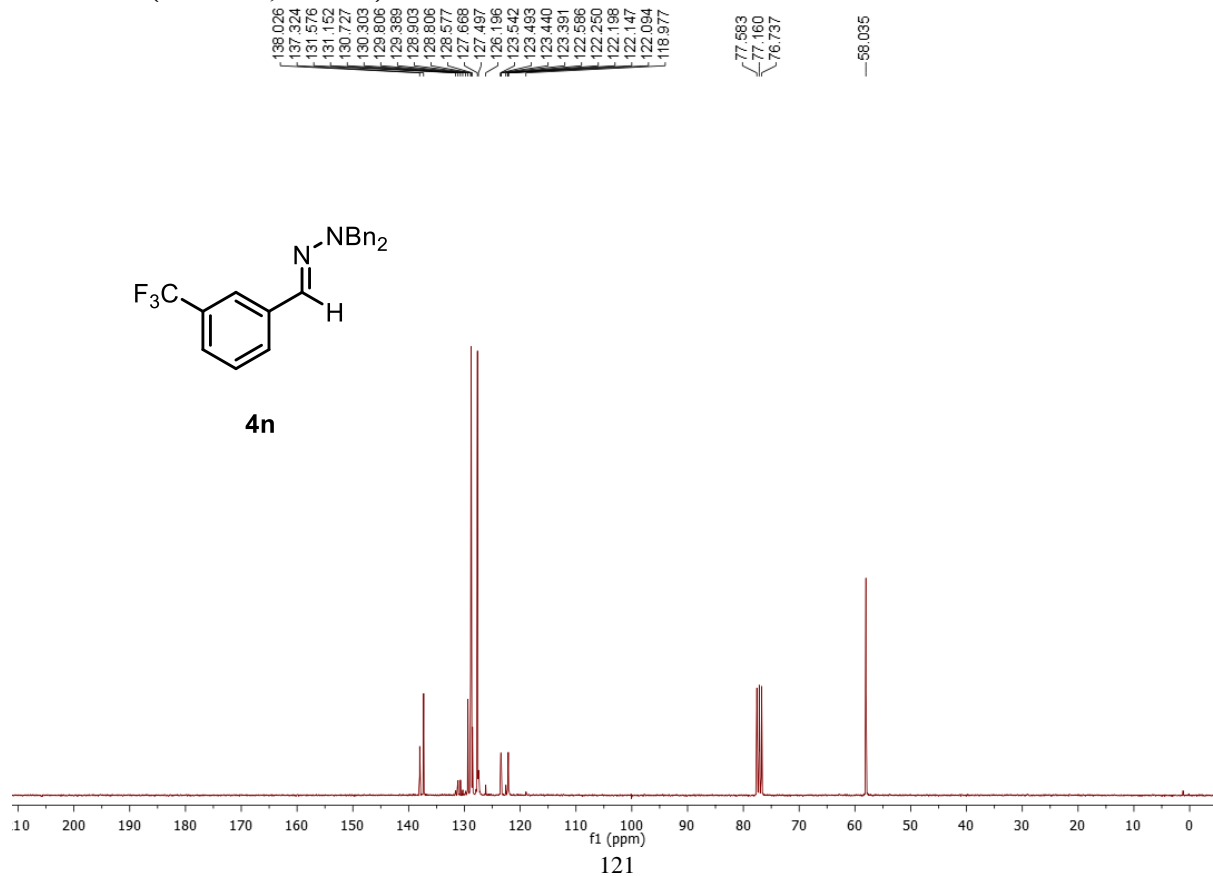

**<sup>1</sup>H NMR (300 MHz, CDCl<sub>3</sub>)**

7.976  
7.970  
7.950  
7.944  
7.835  
7.854  
7.849  
7.843  
7.830  
7.825  
7.820  
7.802  
7.793  
7.777  
7.771  
7.763  
7.750  
7.740  
7.729  
7.722  
7.718  
7.703  
7.198  
7.177  
7.172  
7.114  
7.108  
7.089  
7.083  
7.064  
7.058  
4.560

-1.533

-0.000

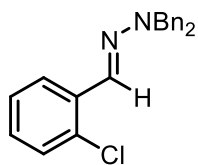

**4o**

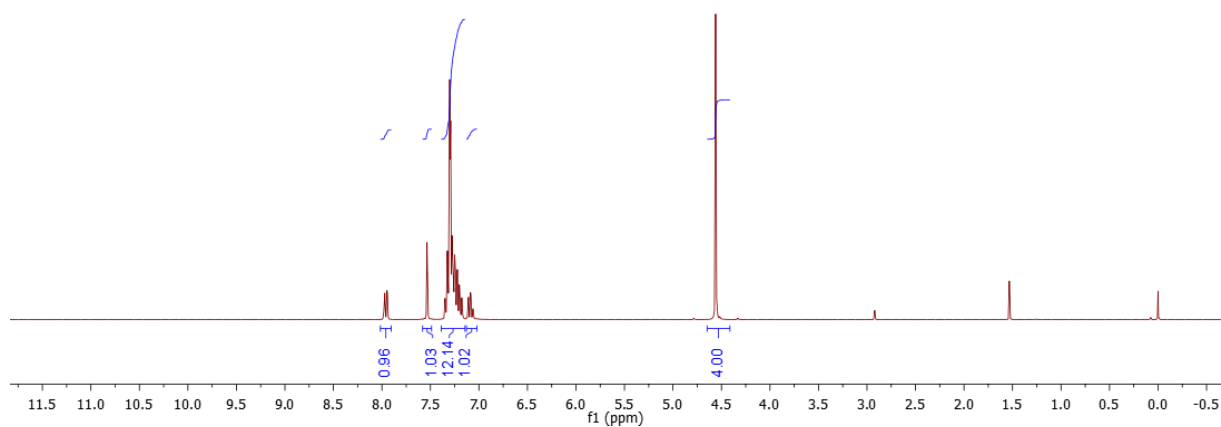

**<sup>13</sup>C NMR (75 MHz, CDCl<sub>3</sub>)**

137.408  
134.340  
132.305  
129.612  
128.738  
128.133  
127.928  
127.881  
127.446  
126.808  
125.788

77.582  
77.159  
76.736

-58.218

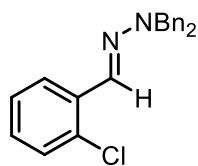

**4o**

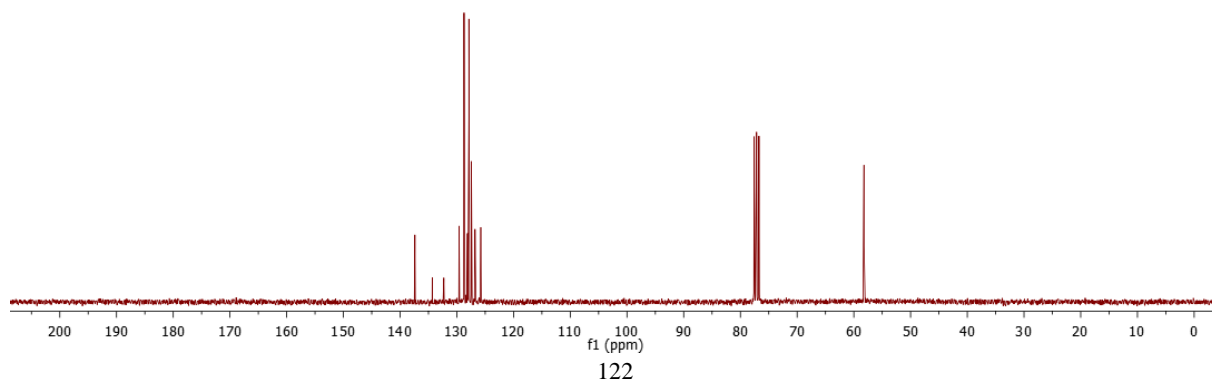

# <sup>1</sup>H NMR (300 MHz, CDCl<sub>3</sub>)

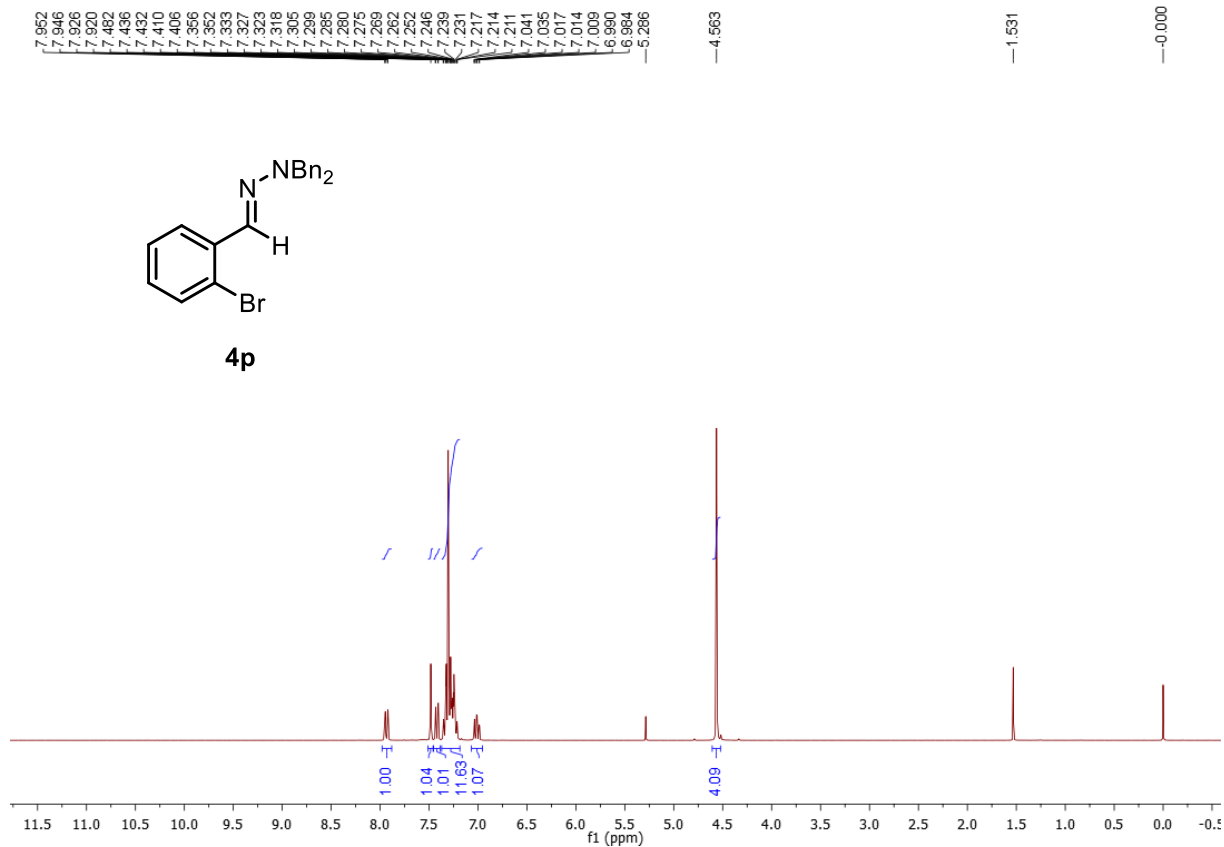

# <sup>13</sup>C NMR (75 MHz, CDCl<sub>3</sub>)

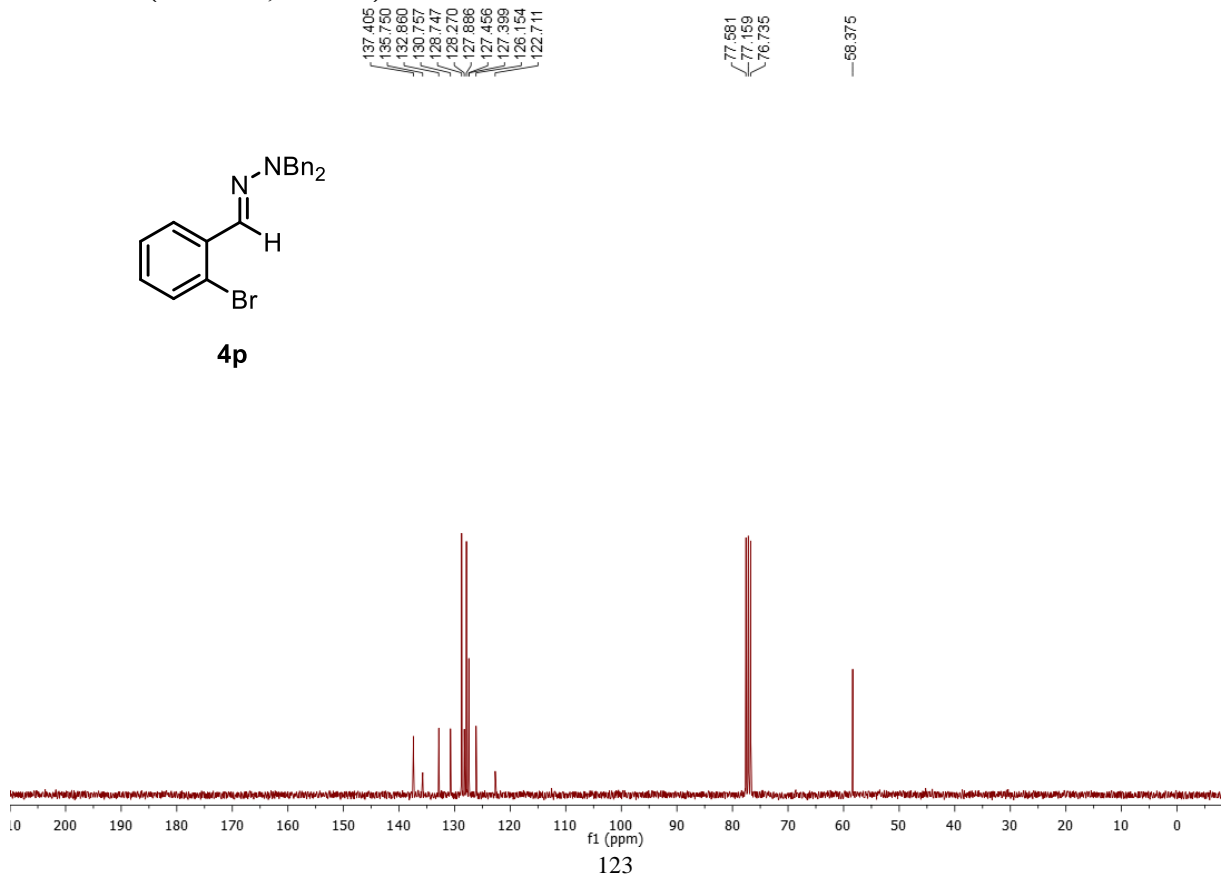



# <sup>1</sup>H NMR (300 MHz, CDCl<sub>3</sub>)

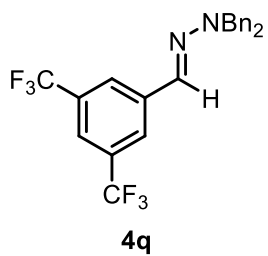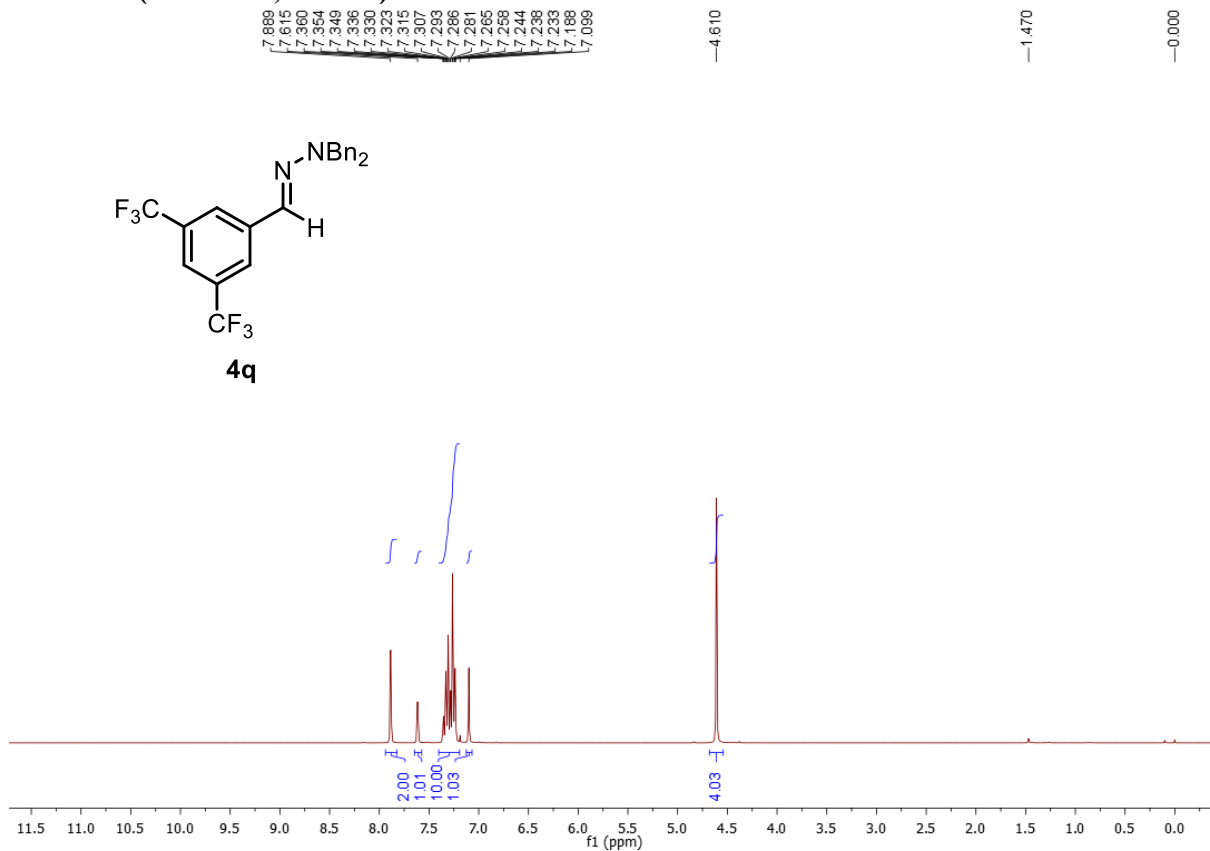

# <sup>13</sup>C NMR (75 MHz, CDCl<sub>3</sub>)

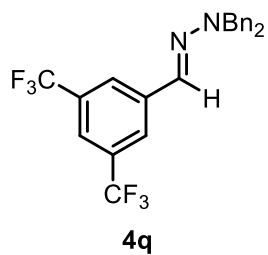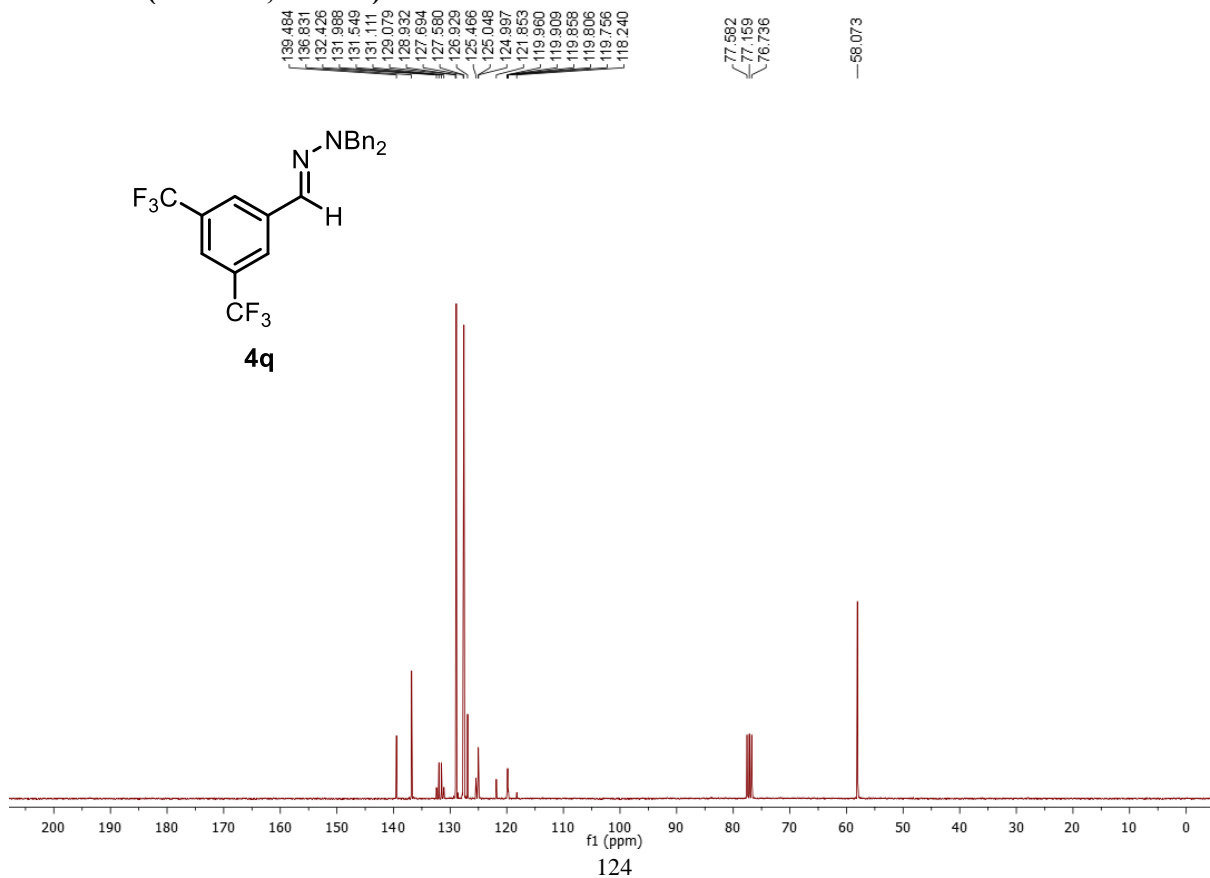

**<sup>1</sup>H NMR (300 MHz, CDCl<sub>3</sub>)**

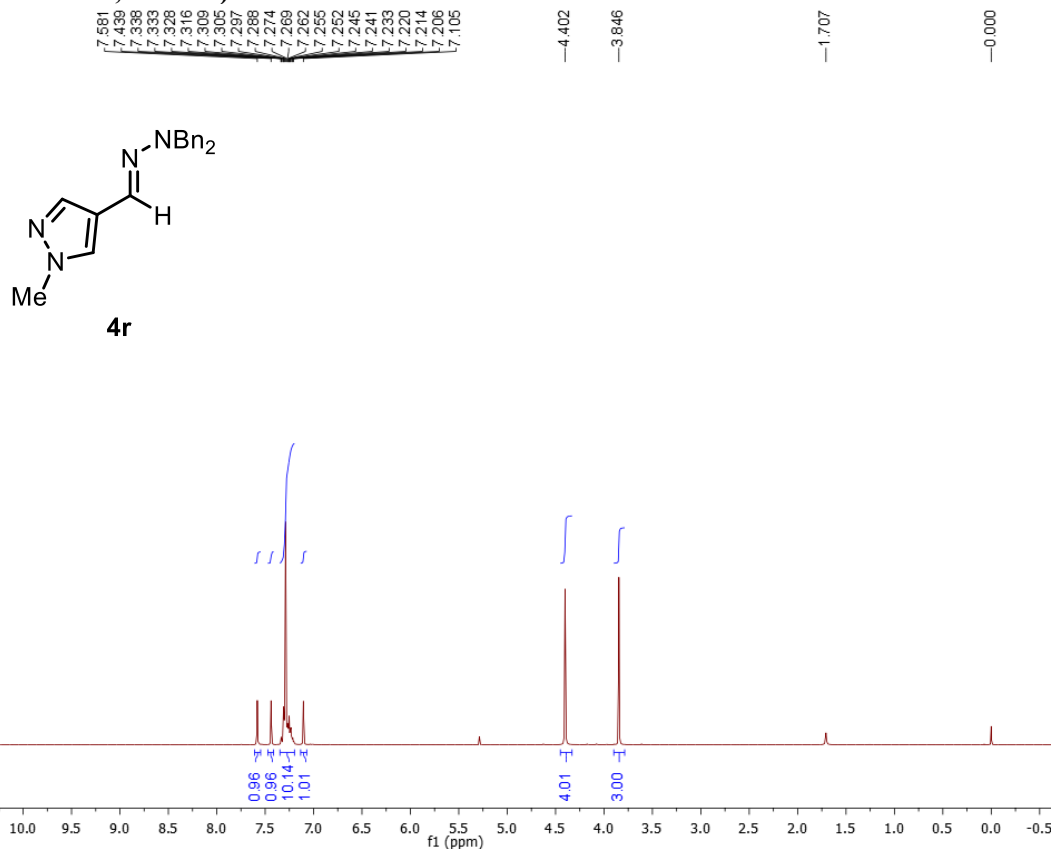

**<sup>13</sup>C NMR (75 MHz, CDCl<sub>3</sub>)**

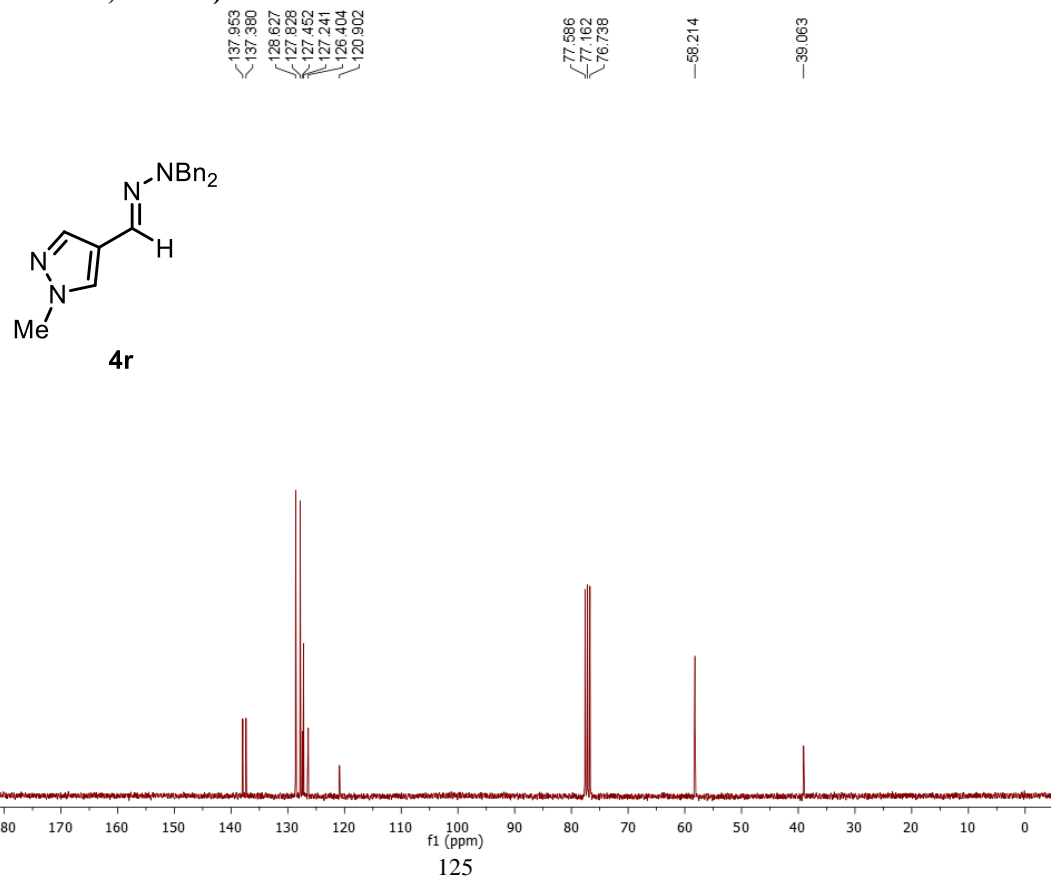

# <sup>1</sup>H NMR (300 MHz, CDCl<sub>3</sub>)

7.339  
7.333  
7.326  
7.319  
7.314  
7.305  
7.297  
7.292  
7.272  
7.265  
7.260  
7.244  
7.239  
6.977

—4.588

—1.539

—0.000

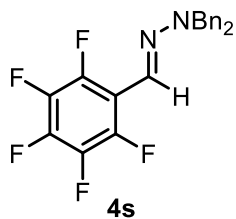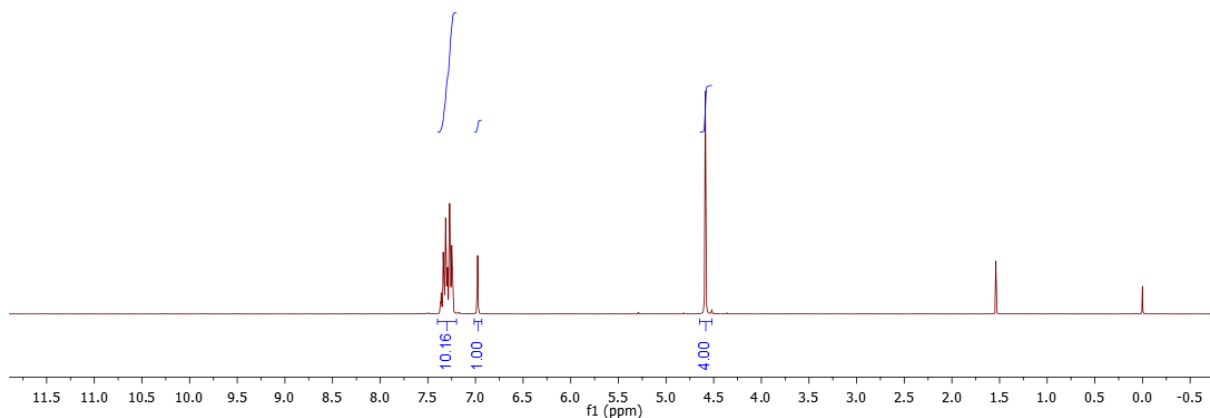

# <sup>13</sup>C NMR (100 MHz, CDCl<sub>3</sub>)

145.530  
145.491  
145.452  
145.415  
145.376  
145.339  
145.301  
143.024  
142.985  
142.947  
142.910  
142.870  
142.833  
142.796  
140.562  
140.515  
140.469  
139.232  
139.205  
139.180  
139.130  
139.103  
139.073  
139.041  
139.014  
138.963  
138.942  
138.910  
138.886  
138.862  
138.052  
138.026  
137.959  
137.870  
136.564  
136.417  
128.853  
127.699  
117.425  
117.394  
117.363  
117.331  
112.634  
112.594  
112.514  
112.473  
112.394  
112.353  
77.478  
77.161  
59.884

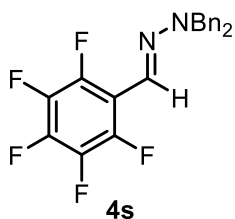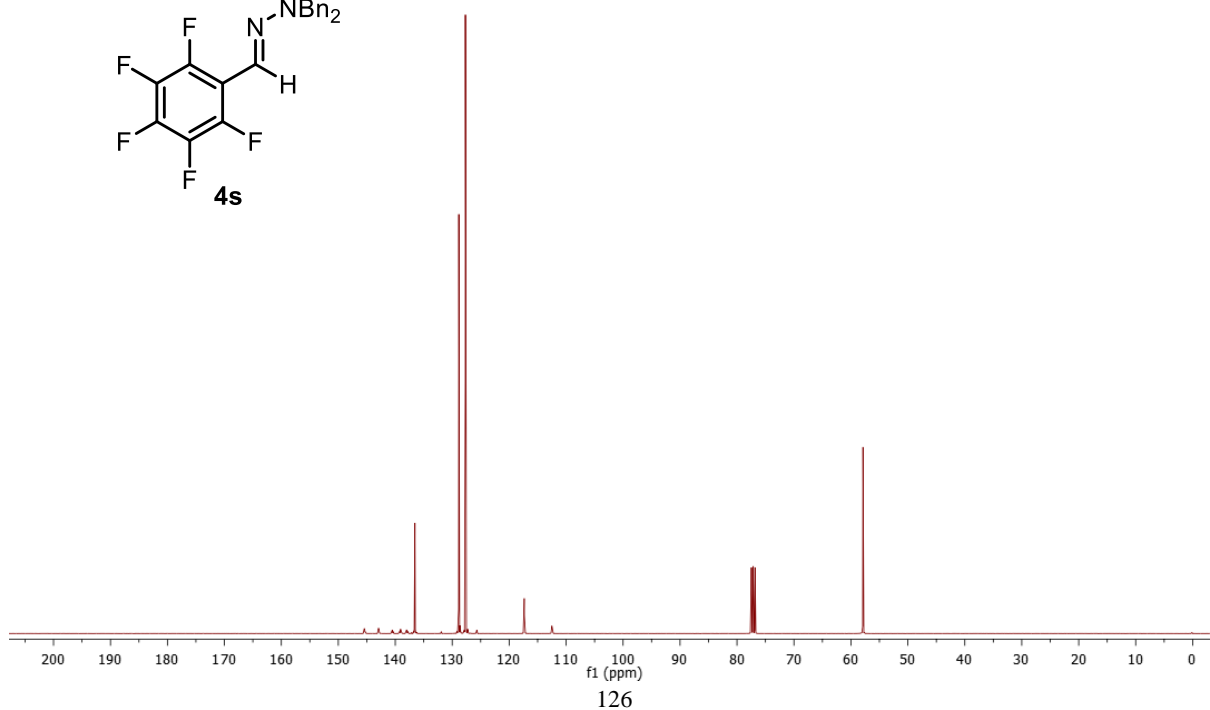

### <sup>1</sup>H NMR (300 MHz, CDCl<sub>3</sub>)

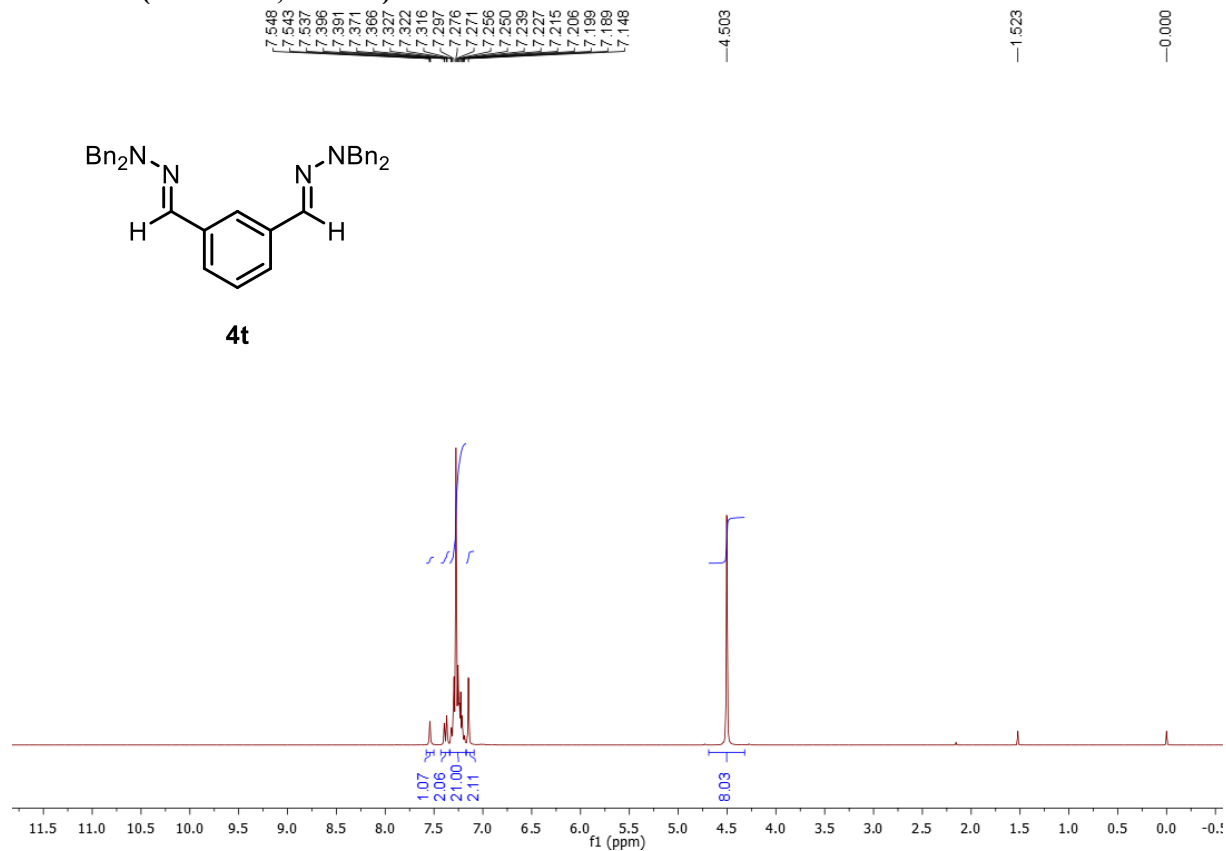

### <sup>13</sup>C NMR (75 MHz, CDCl<sub>3</sub>)

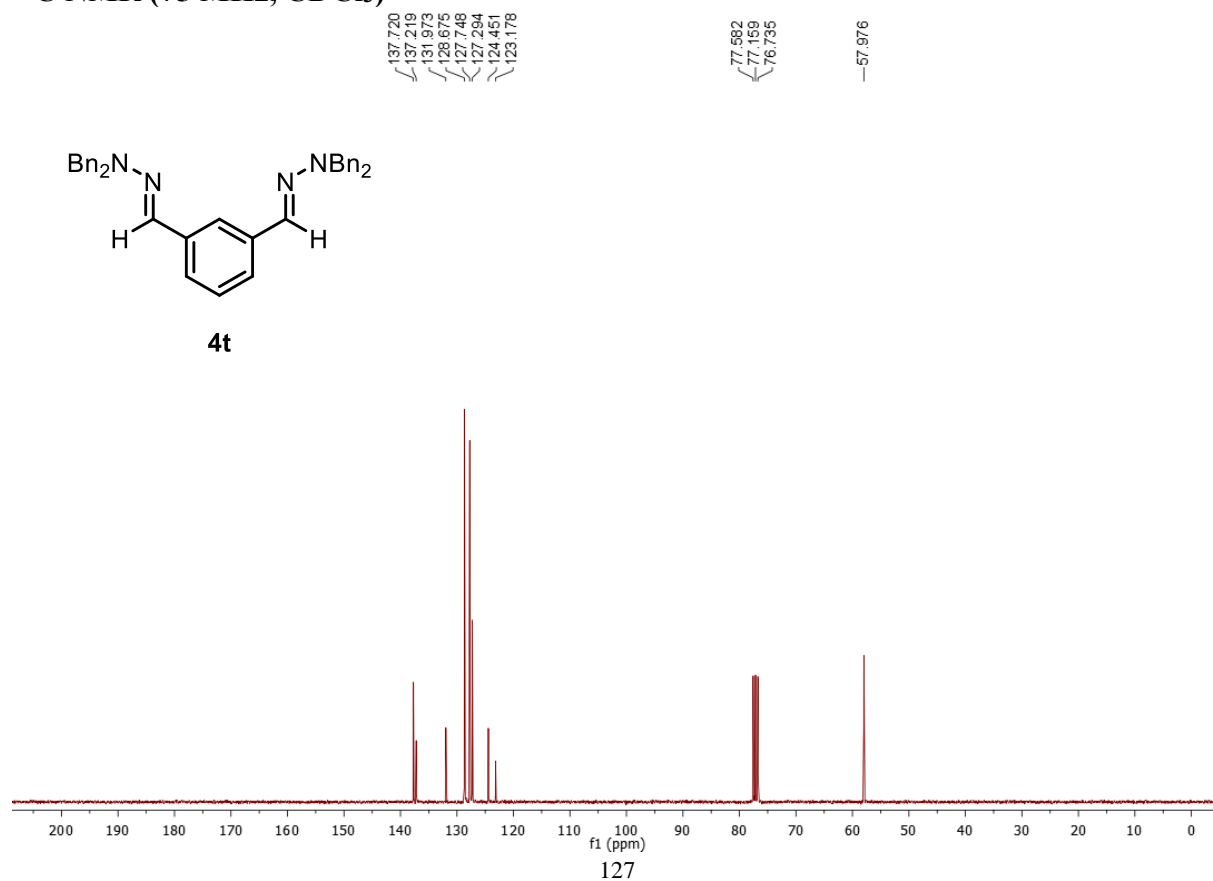

# <sup>1</sup>H NMR (300 MHz, CDCl<sub>3</sub>)

7.616  
7.610  
7.603  
7.593  
7.587  
7.584  
7.576  
7.372  
7.367  
7.361  
7.351  
7.347  
7.344  
7.338  
7.324  
7.319  
7.311  
7.300  
7.295  
7.290  
7.280  
7.271  
7.261  
7.249  
7.246

3.896  
3.885  
3.880  
3.873  
3.863  
3.186  
3.176  
3.170  
3.164  
3.154

-1.687

-0.000

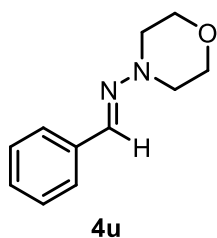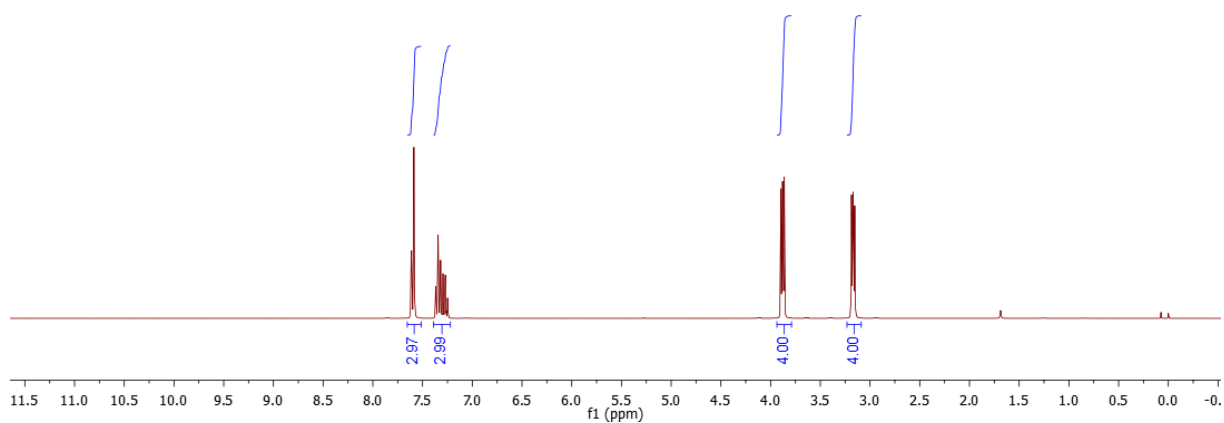

# <sup>13</sup>C NMR (75 MHz, CDCl<sub>3</sub>)

136.365  
136.052  
128.669  
128.471  
126.322

77.582  
77.159  
76.735

-66.573

-51.976

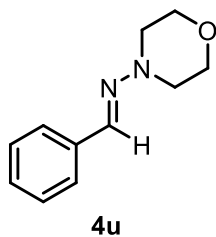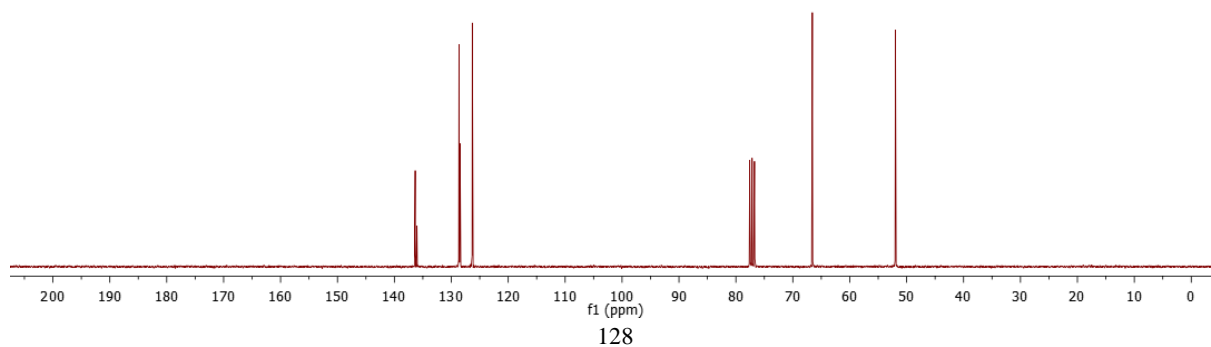

# <sup>1</sup>H NMR (300 MHz, CDCl<sub>3</sub>)

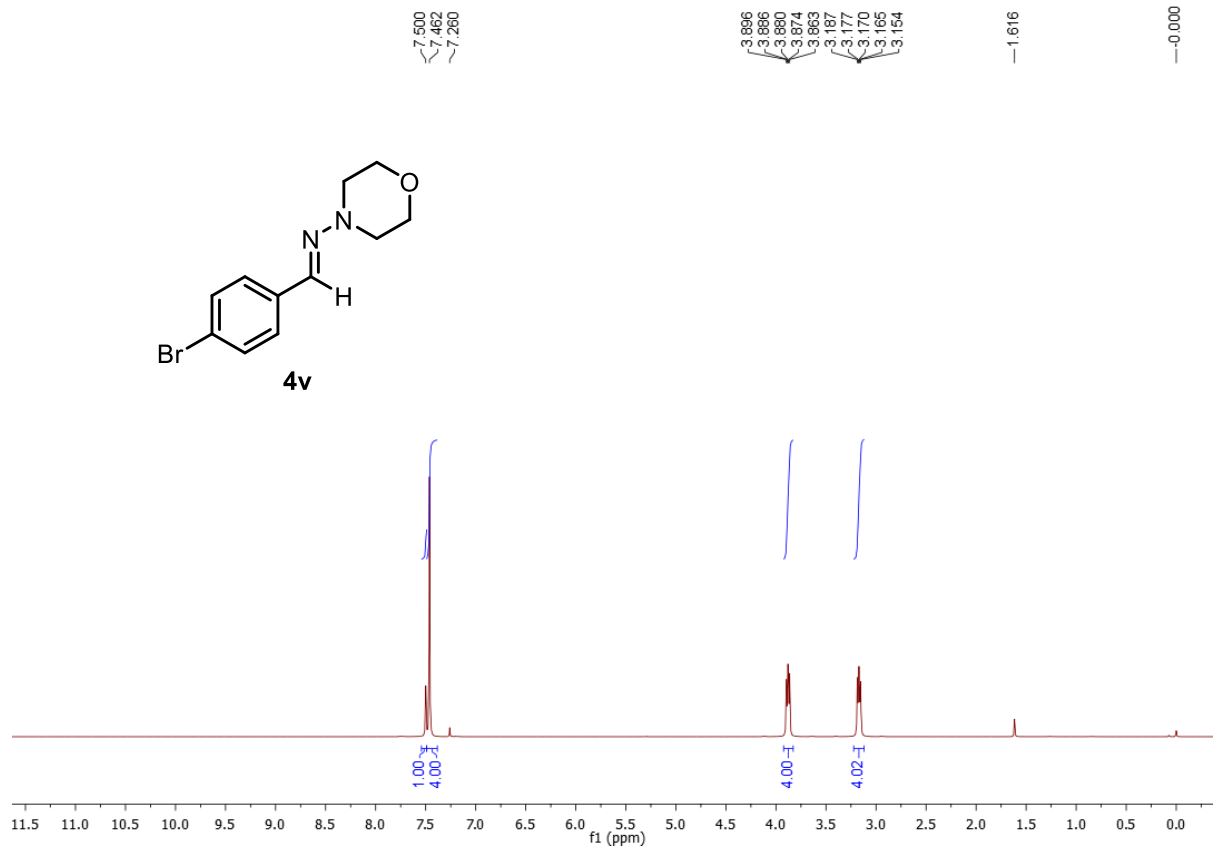

# <sup>13</sup>C NMR (75 MHz, CDCl<sub>3</sub>)

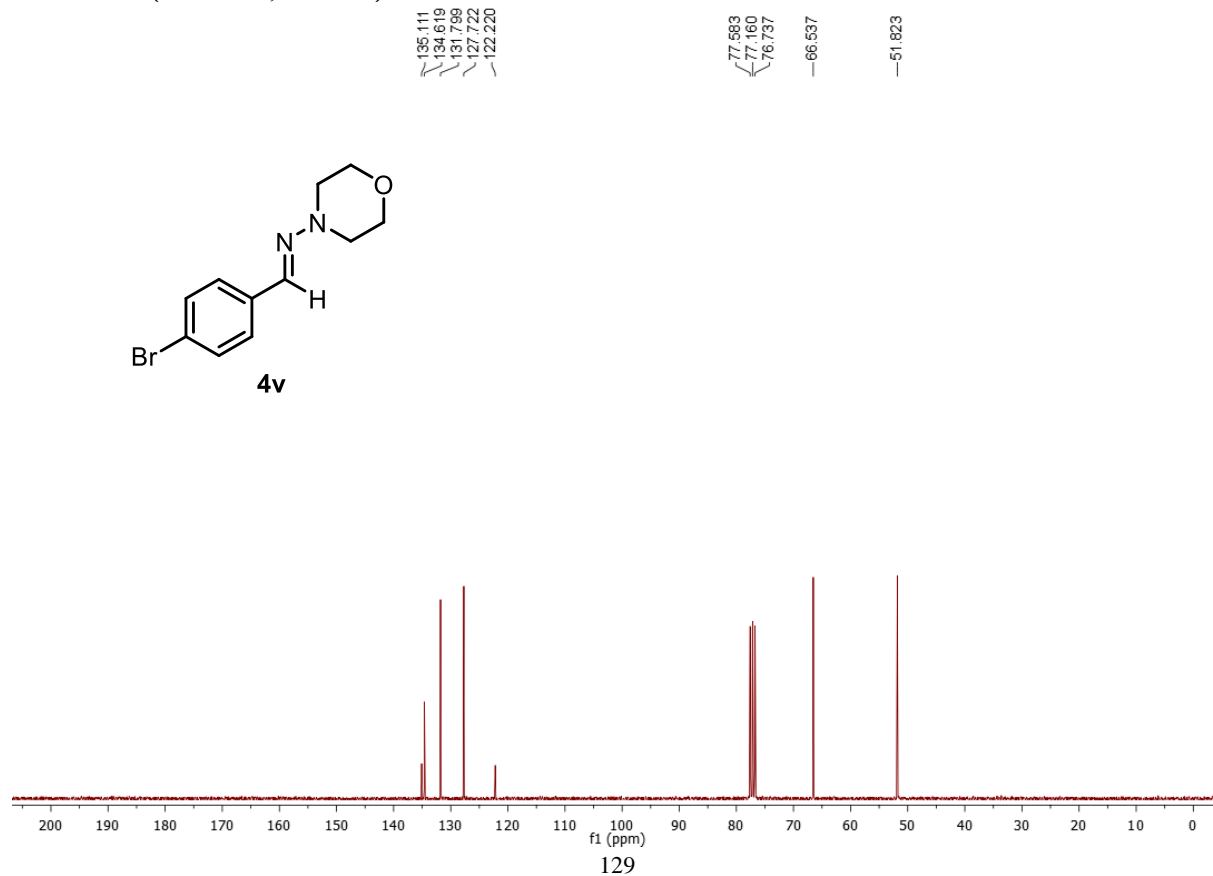

# <sup>1</sup>H NMR (300 MHz, CDCl<sub>3</sub>)

7.936  
7.928  
7.908  
7.902  
7.866  
7.526  
7.522  
7.499  
7.485  
7.295  
7.292  
7.290  
7.269  
7.265  
7.244  
7.239  
7.135  
7.129  
7.109  
7.103  
7.084  
7.078

3.896  
3.886  
3.880  
3.874  
3.863  
3.228  
3.218  
3.211  
3.206  
3.195

-1.738

-0.000

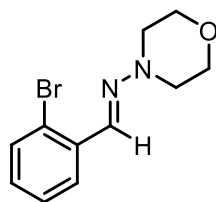

4w

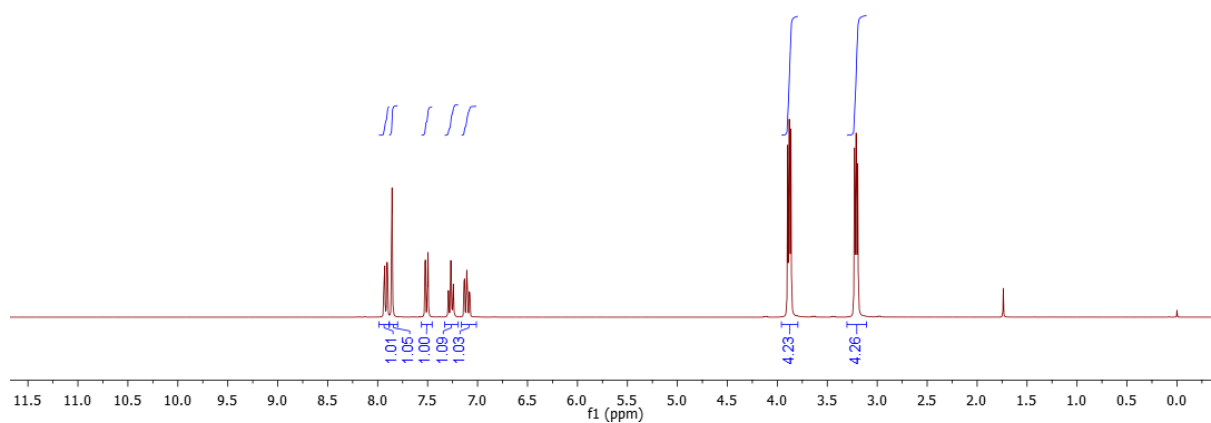

# <sup>13</sup>C NMR (75 MHz, CDCl<sub>3</sub>)

134.750  
134.688  
132.924  
129.448  
127.548  
126.832  
123.352

77.584  
77.160  
76.737

-66.458

-51.785

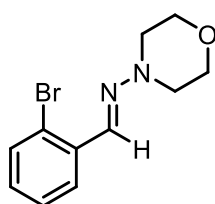

4w

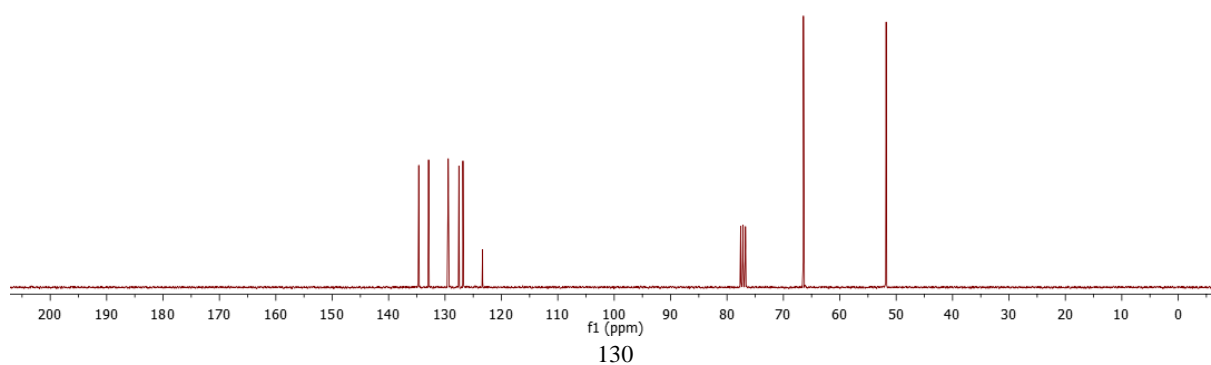

# <sup>1</sup>H NMR (300 MHz, CDCl<sub>3</sub>)

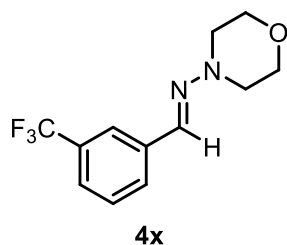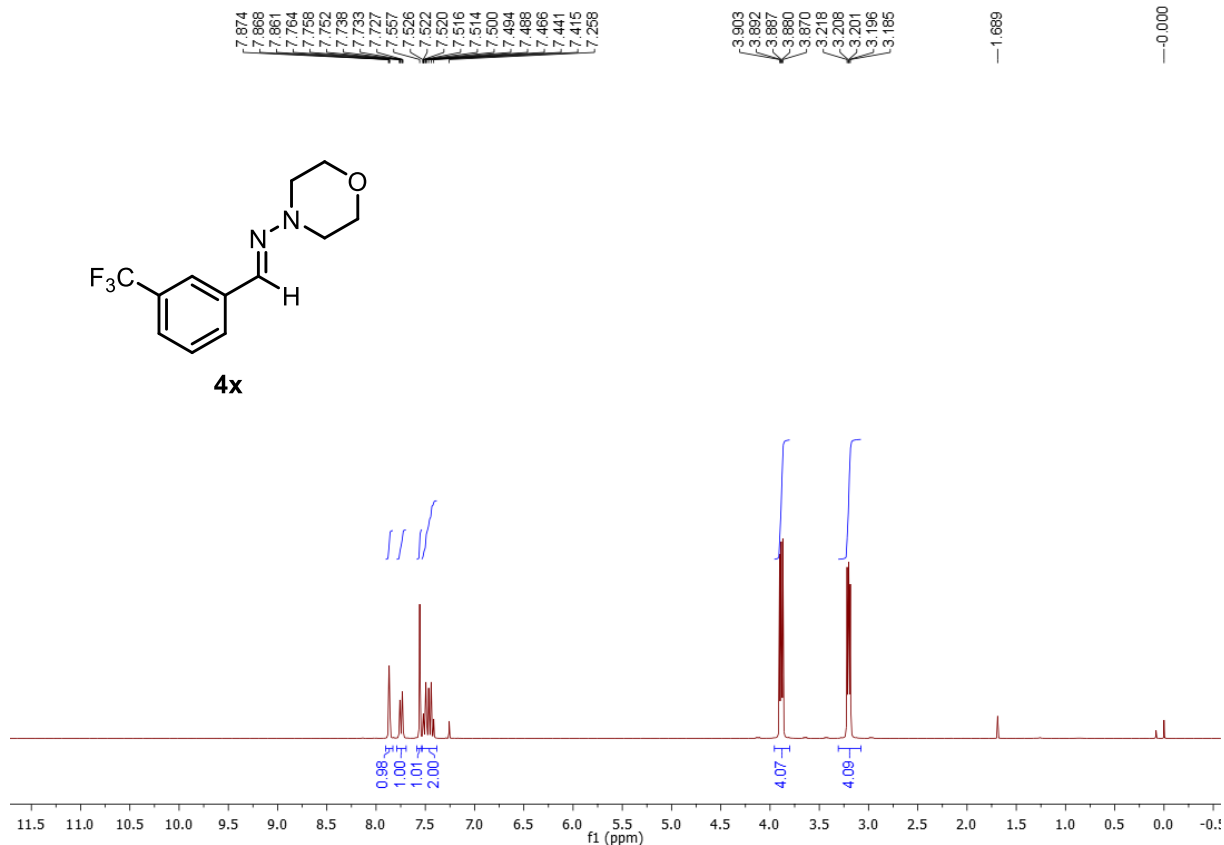

# <sup>13</sup>C NMR (75 MHz, CDCl<sub>3</sub>)

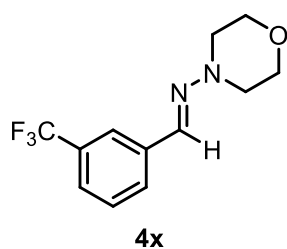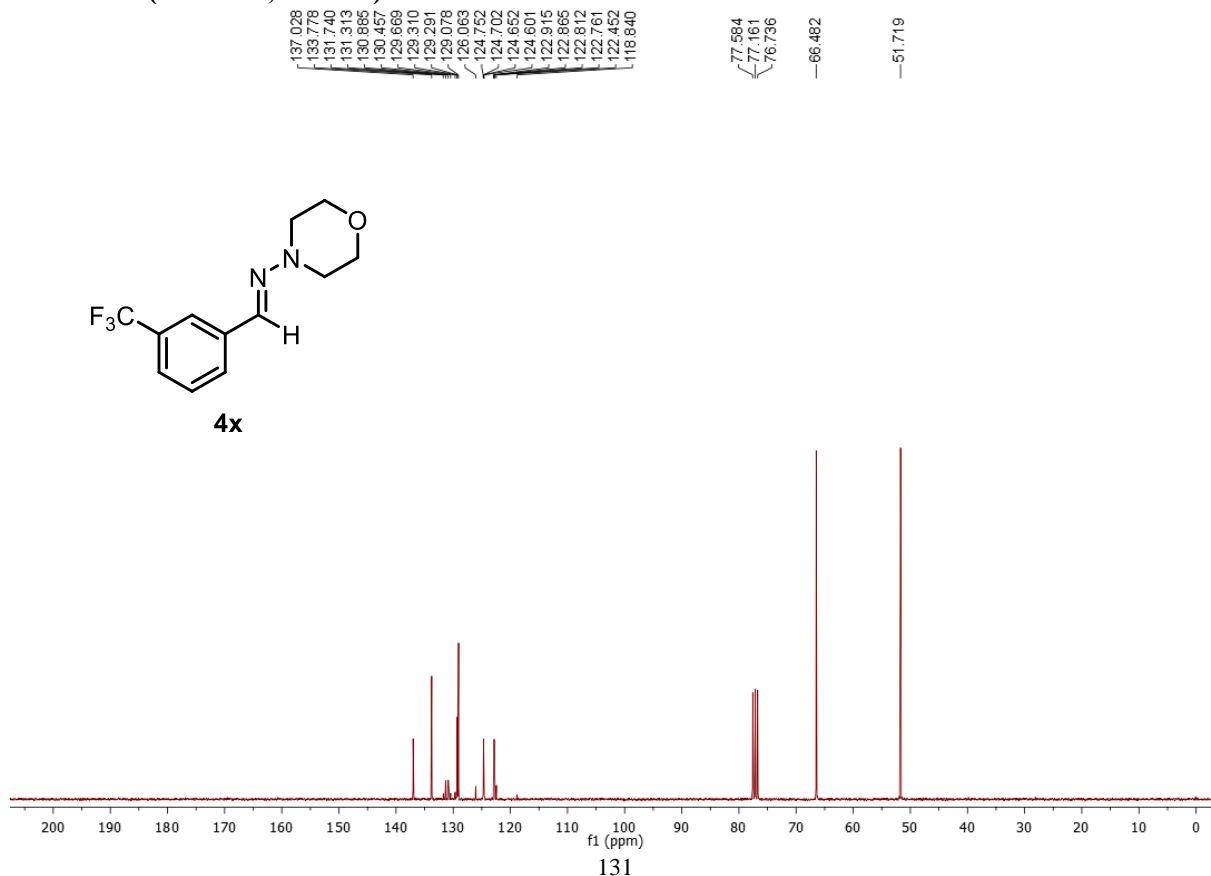



# <sup>1</sup>H NMR (300 MHz, CDCl<sub>3</sub>)

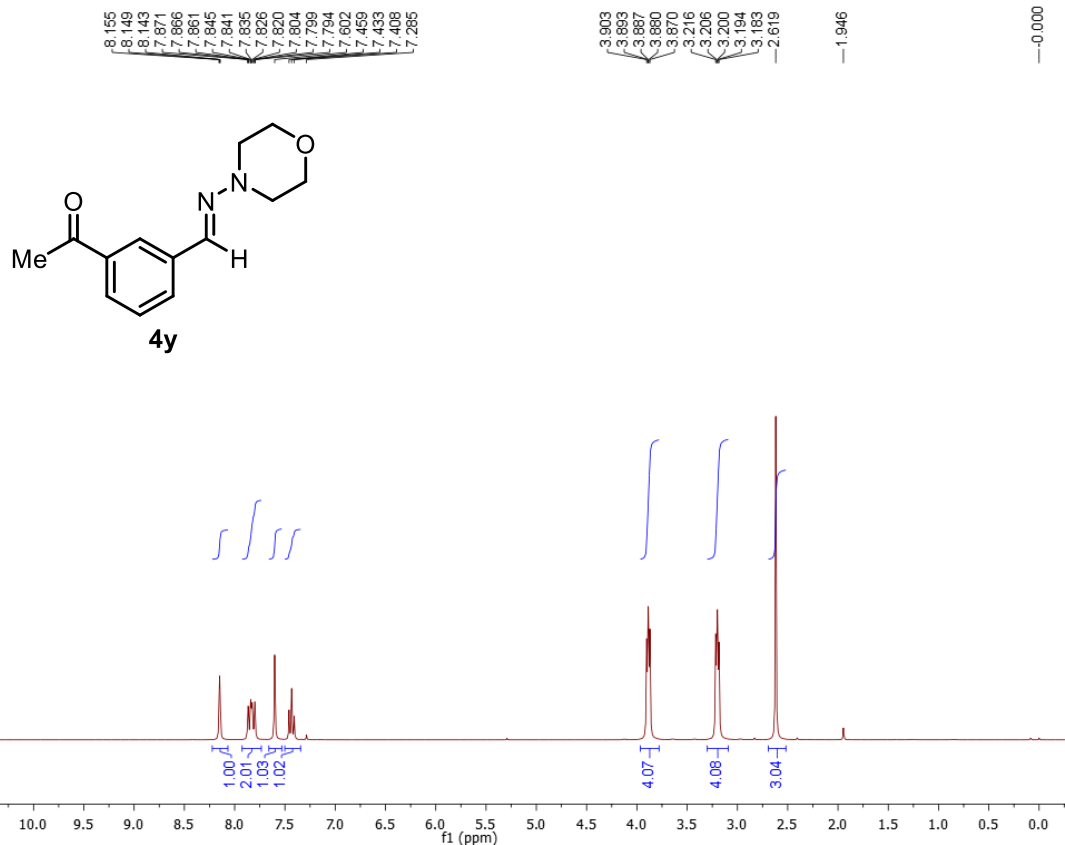

# <sup>13</sup>C NMR (75 MHz, CDCl<sub>3</sub>)

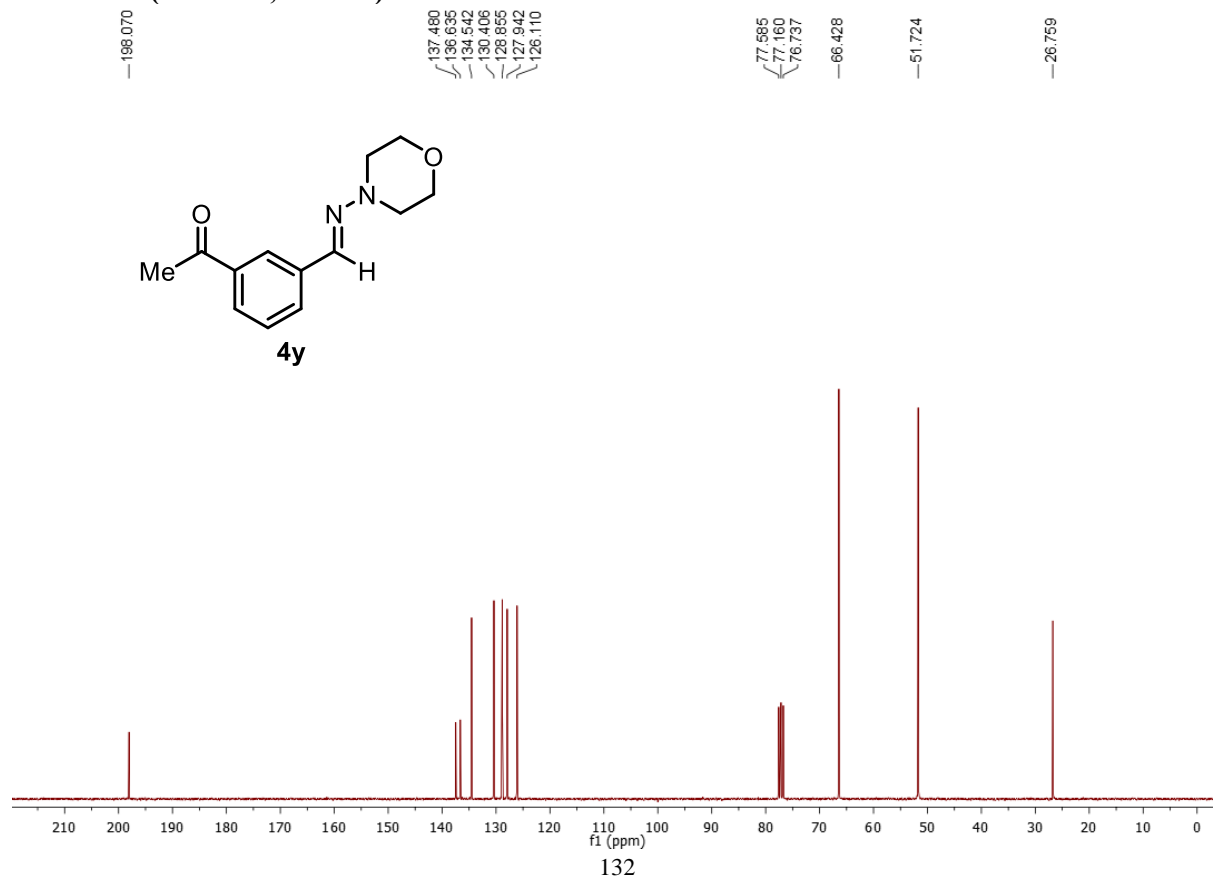

# <sup>1</sup>H NMR (300 MHz, CDCl<sub>3</sub>)

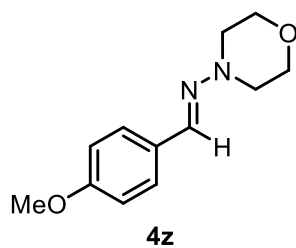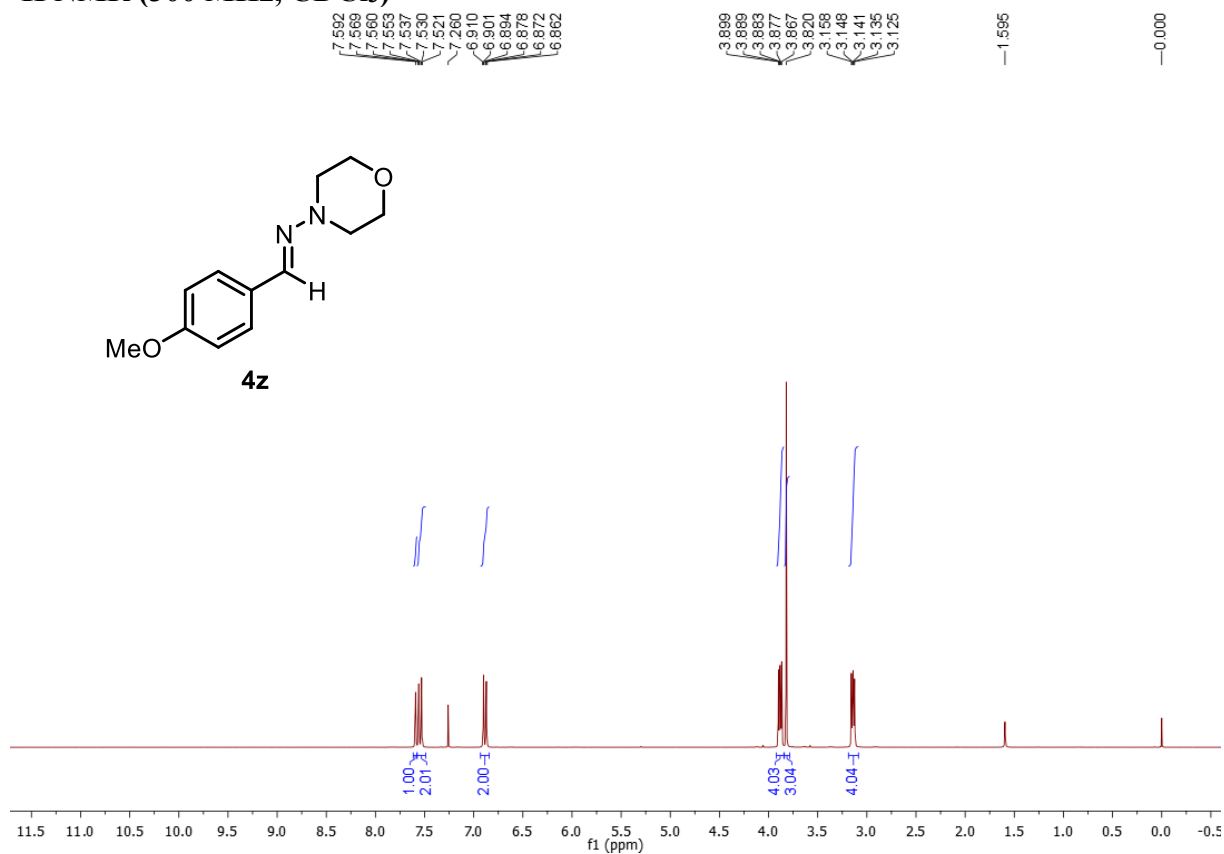

# <sup>13</sup>C NMR (75 MHz, CDCl<sub>3</sub>)

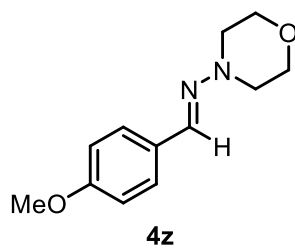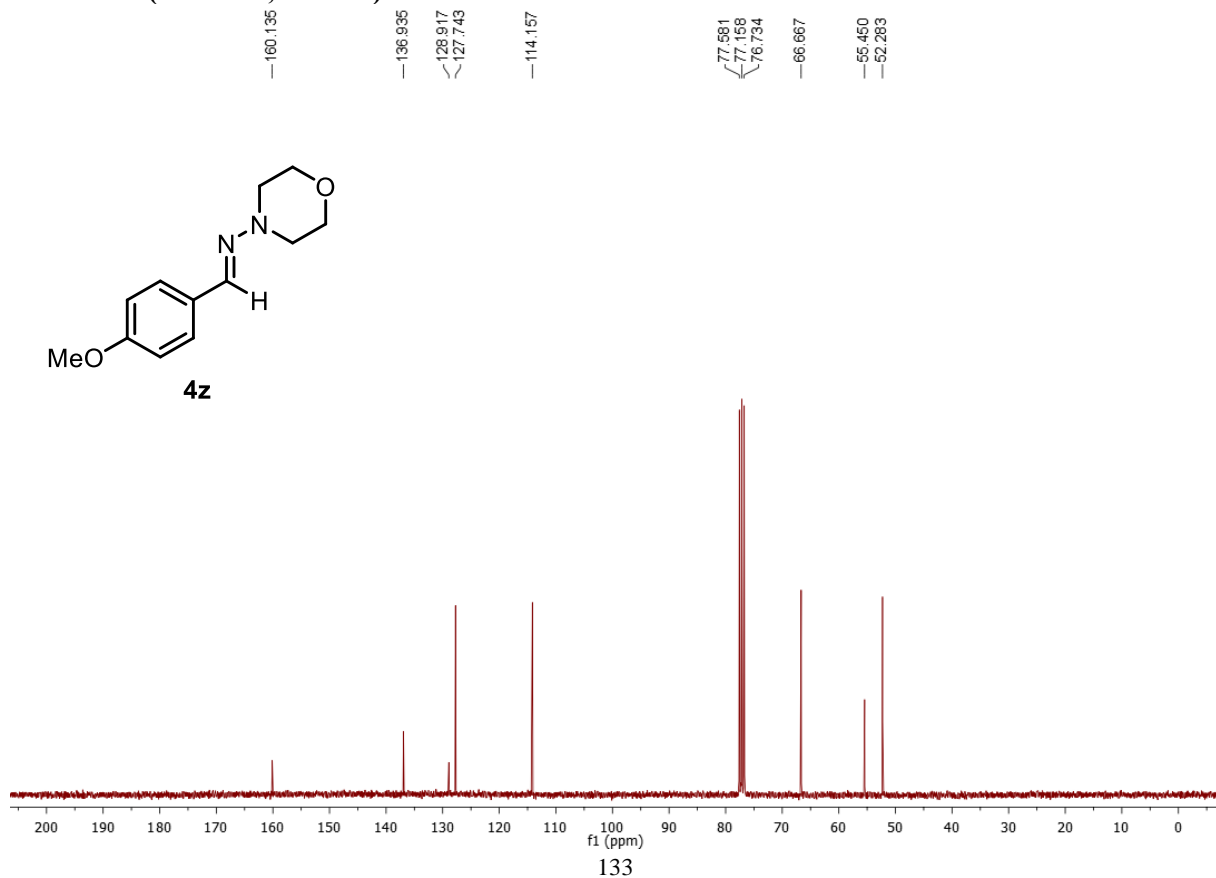

# <sup>1</sup>H NMR (300 MHz, CDCl<sub>3</sub>)

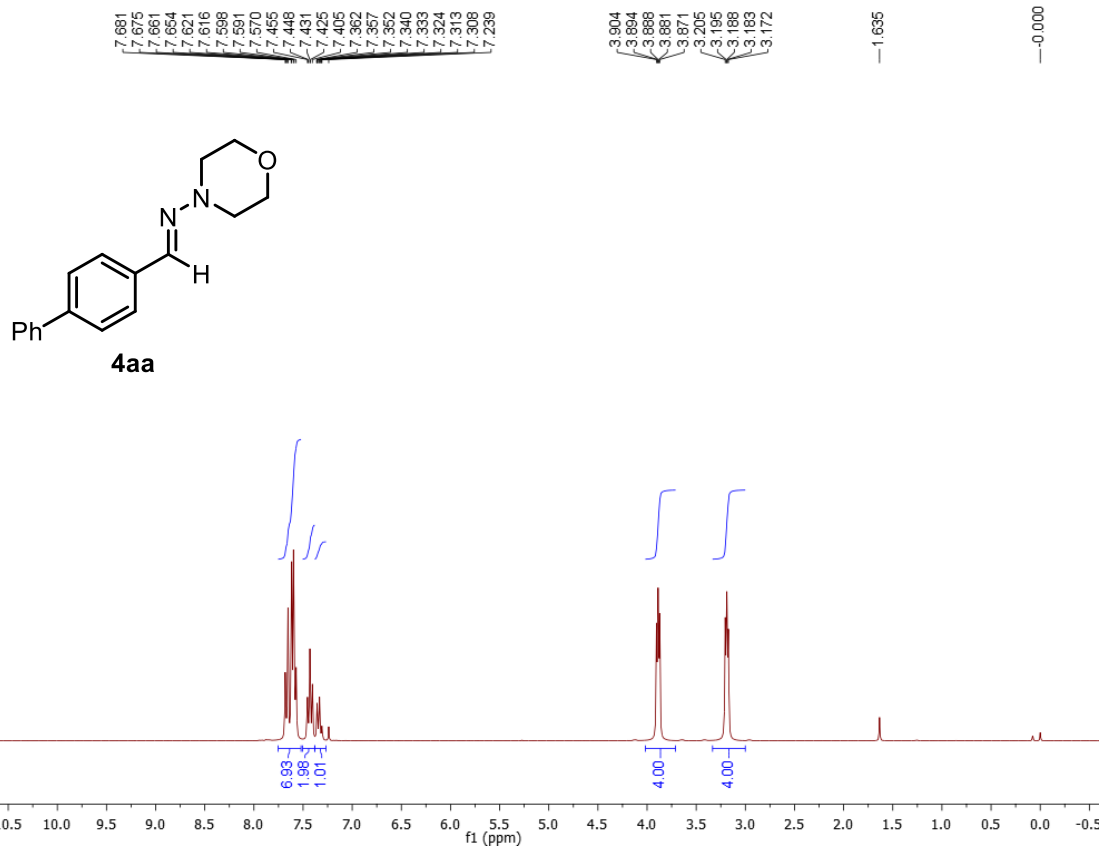

# <sup>13</sup>C NMR (75 MHz, CDCl<sub>3</sub>)

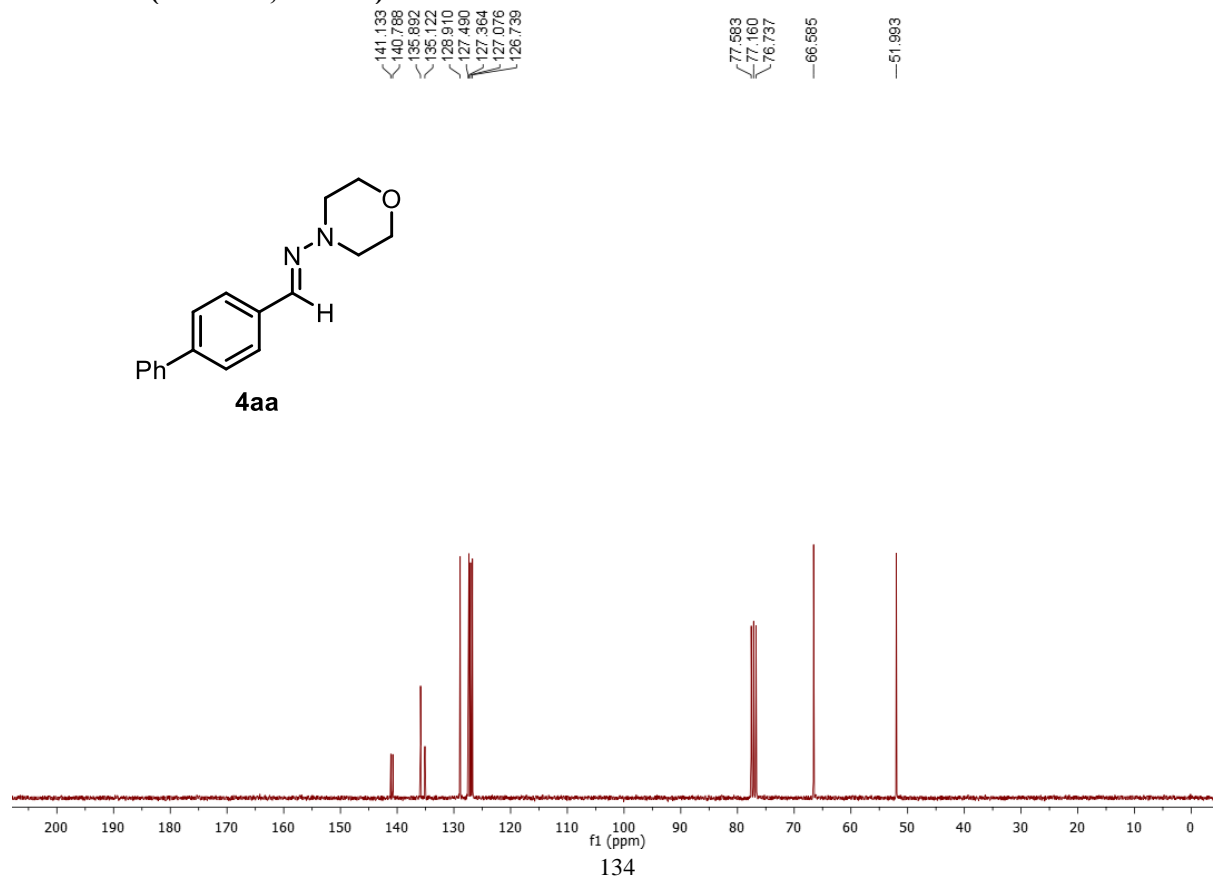

# <sup>1</sup>H NMR (300 MHz, CDCl<sub>3</sub>)

7.882  
7.875  
7.660  
7.654  
7.479  
7.344  
7.338  
7.322  
7.316  
7.260

3.897  
3.886  
3.880  
3.874  
3.664  
3.169  
3.179  
3.173  
3.167  
3.157

1.580

0.070  
0.000

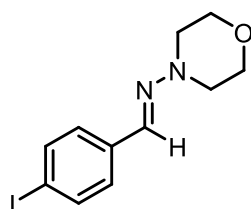

4ad

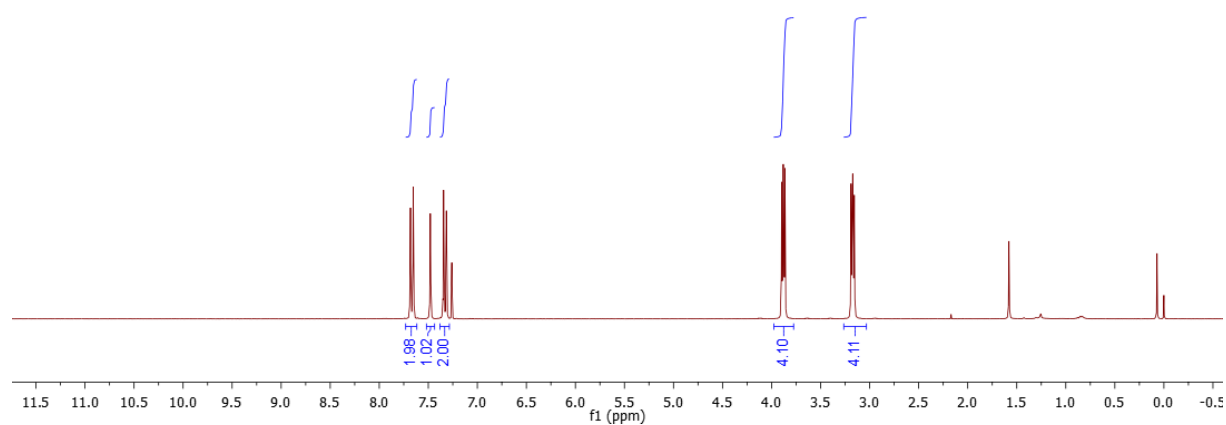

# <sup>13</sup>C NMR (75 MHz, CDCl<sub>3</sub>)

137.788  
135.706  
134.707  
127.931

93.870

77.585  
77.161  
76.758

66.549

51.814

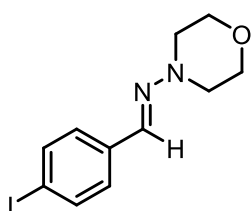

4ad

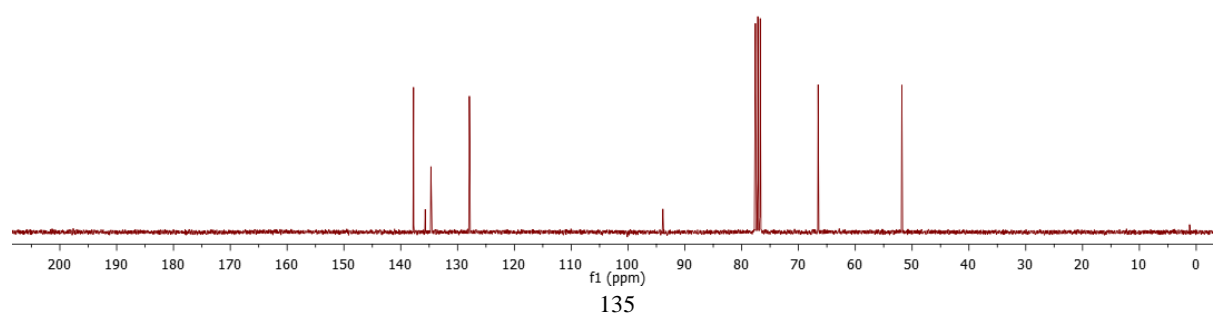

# <sup>1</sup>H NMR (300 MHz, CDCl<sub>3</sub>)

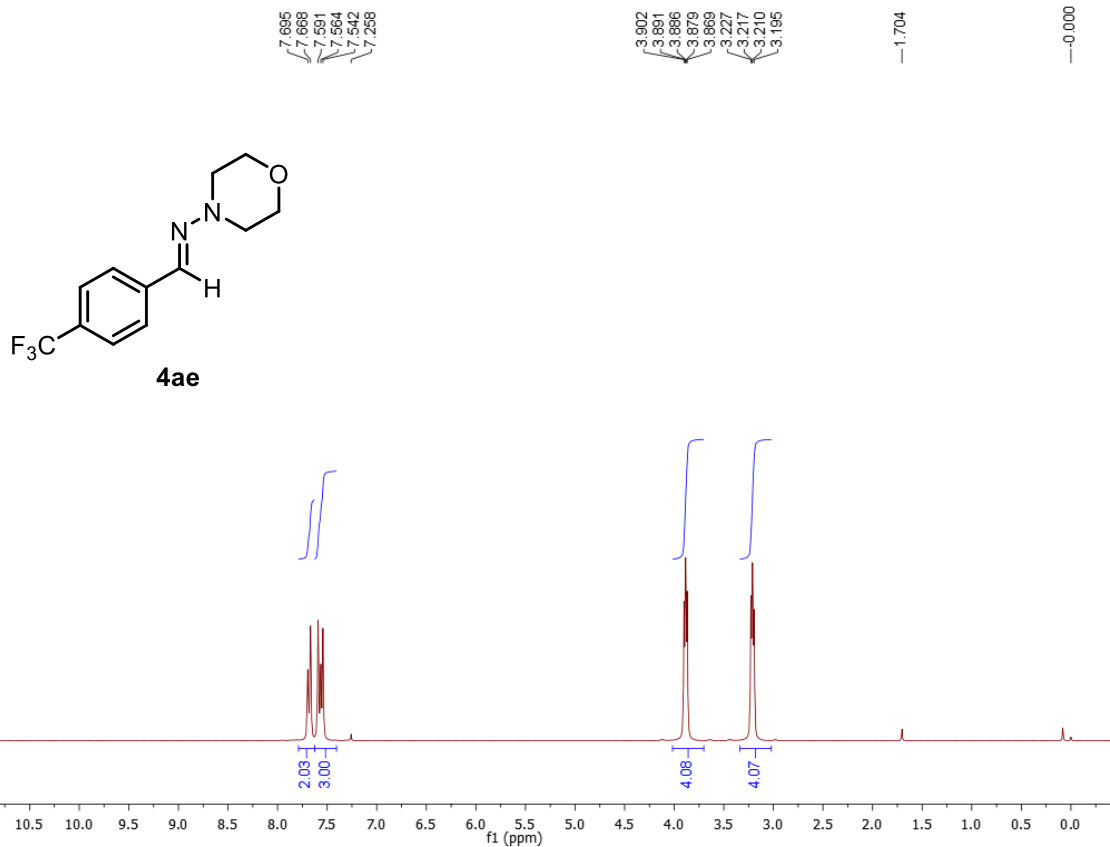

# <sup>13</sup>C NMR (75 MHz, CDCl<sub>3</sub>)

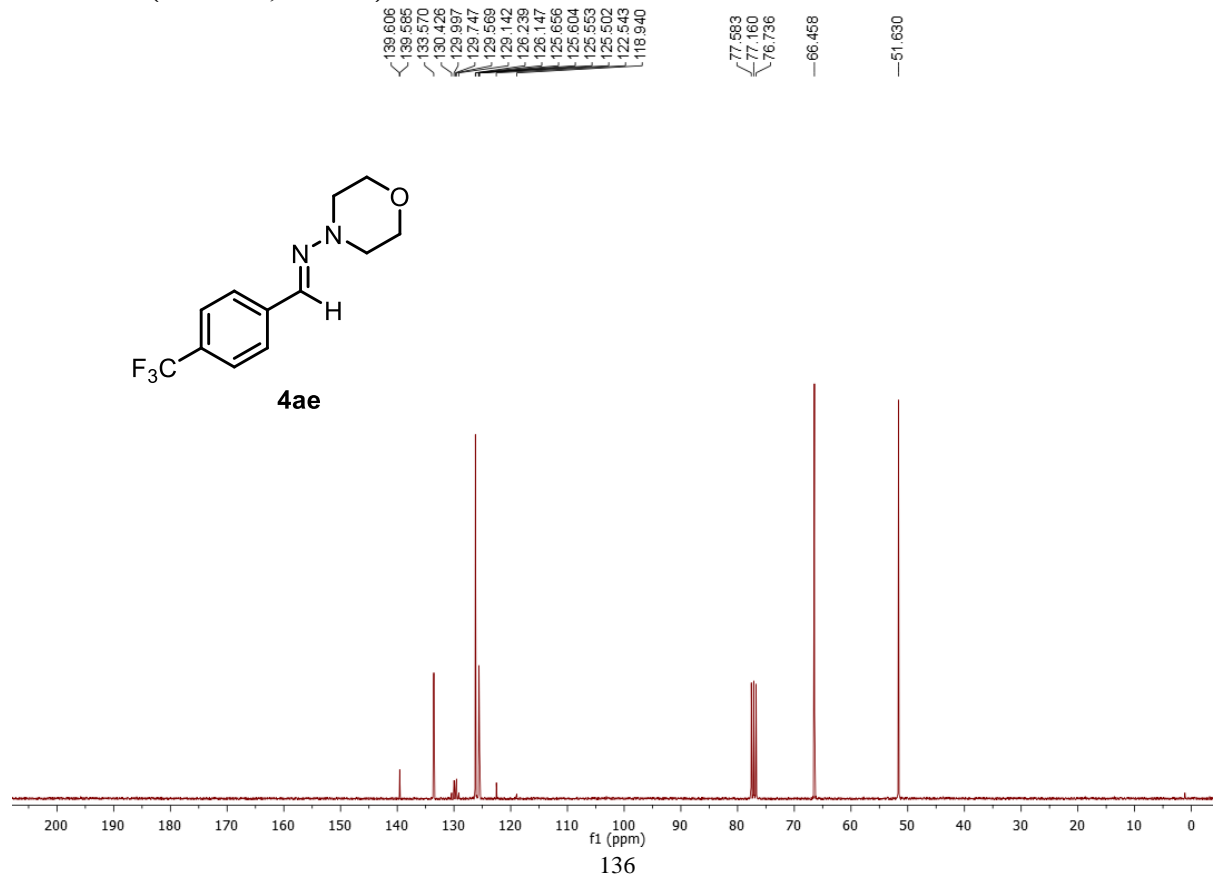

# <sup>1</sup>H NMR (300 MHz, CDCl<sub>3</sub>)

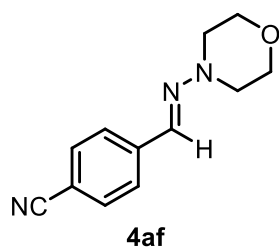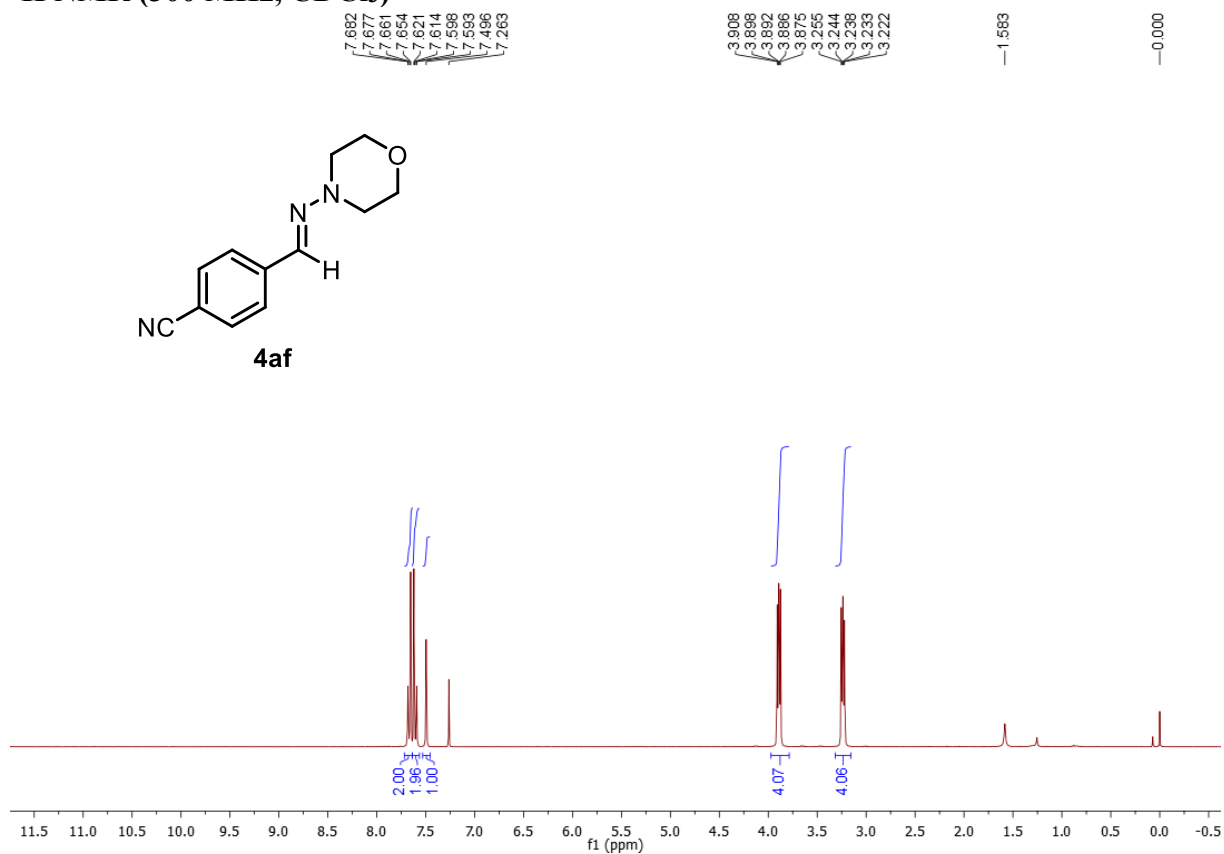

# <sup>13</sup>C NMR (75 MHz, CDCl<sub>3</sub>)

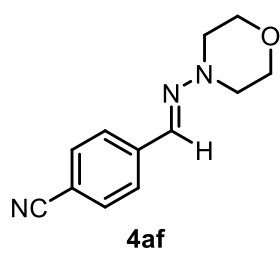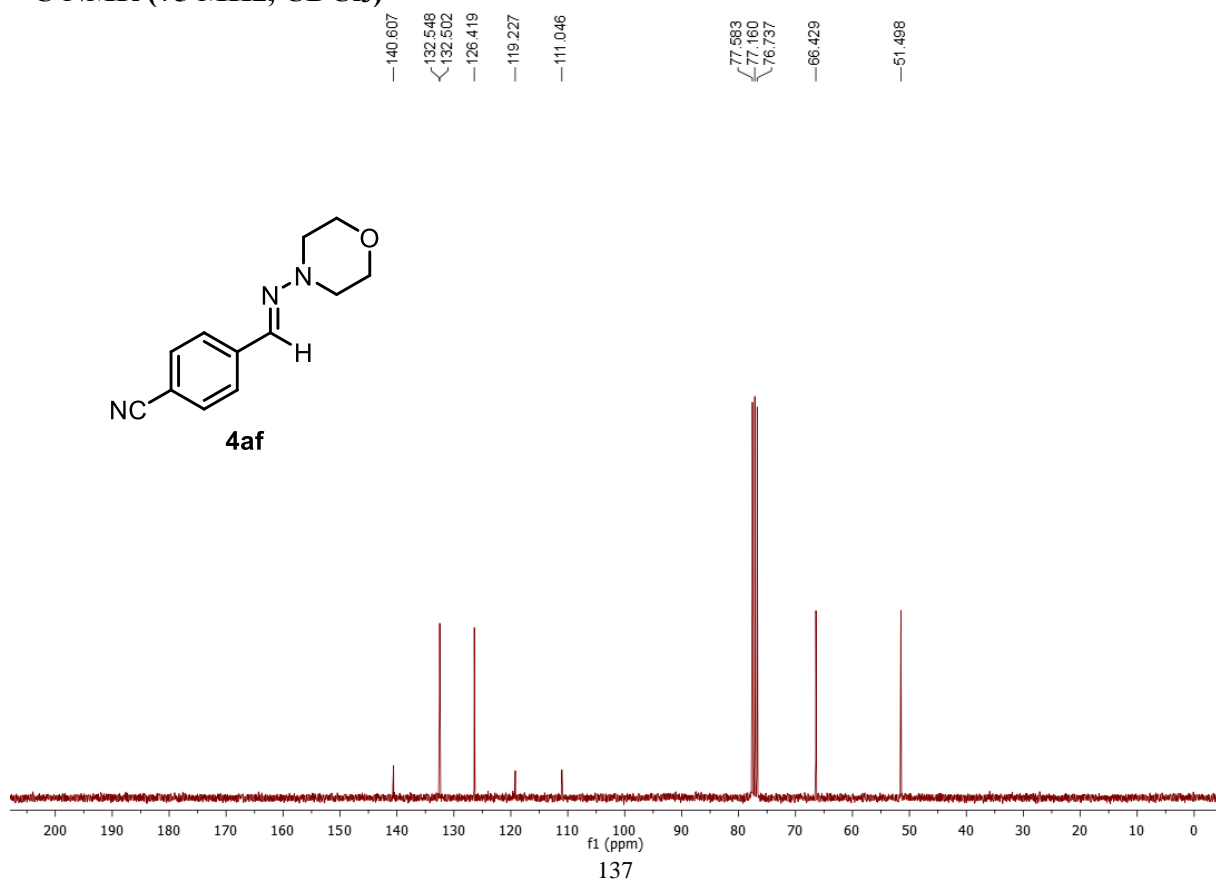

**<sup>1</sup>H NMR (300 MHz, CDCl<sub>3</sub>)**

7.524  
7.496  
7.483  
7.307  
7.279

3.873  
3.857  
3.840  
3.162  
3.146  
3.130

-0.000

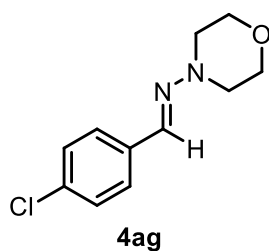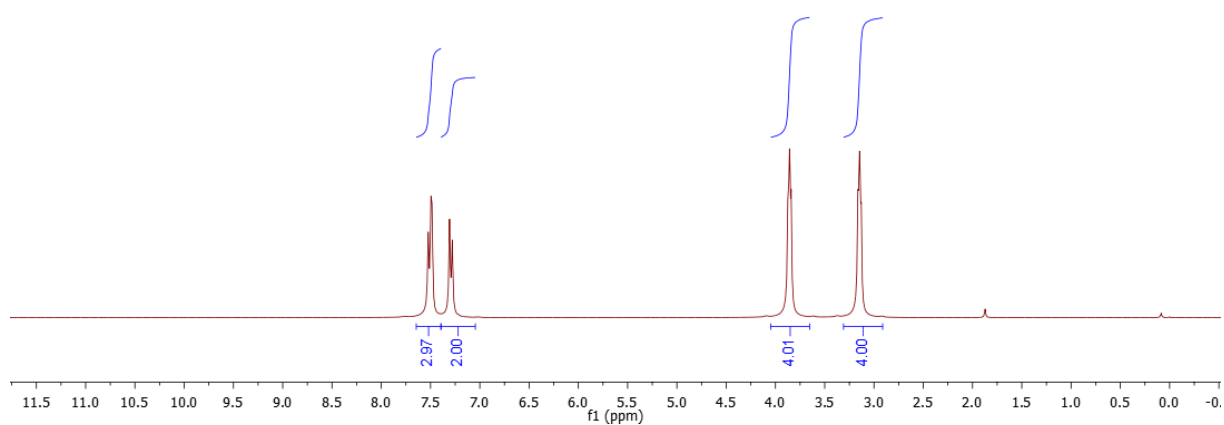

**<sup>13</sup>C NMR (75 MHz, CDCl<sub>3</sub>)**

134.624  
134.417  
133.851  
128.752  
127.344

77.584  
77.160  
76.736  
-66.418  
-51.739

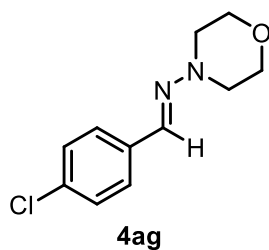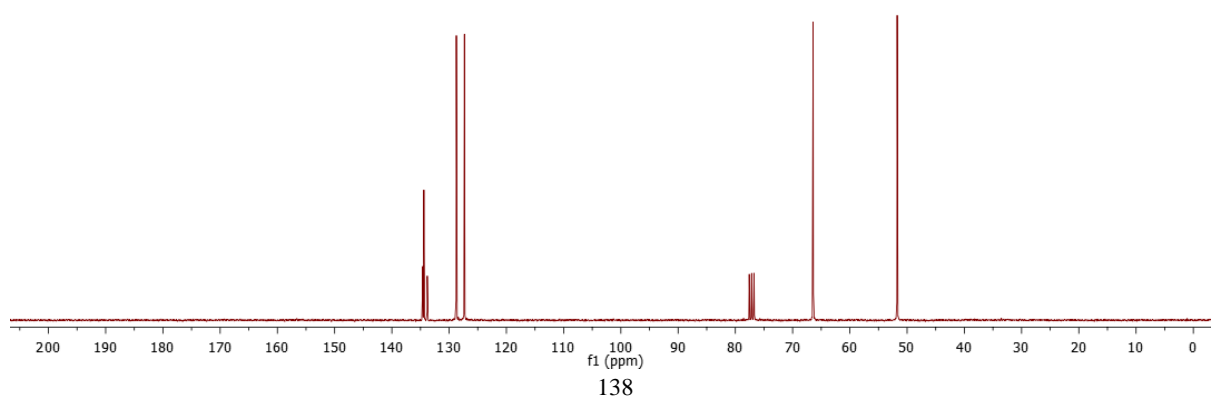

# <sup>1</sup>H NMR (300 MHz, CDCl<sub>3</sub>)

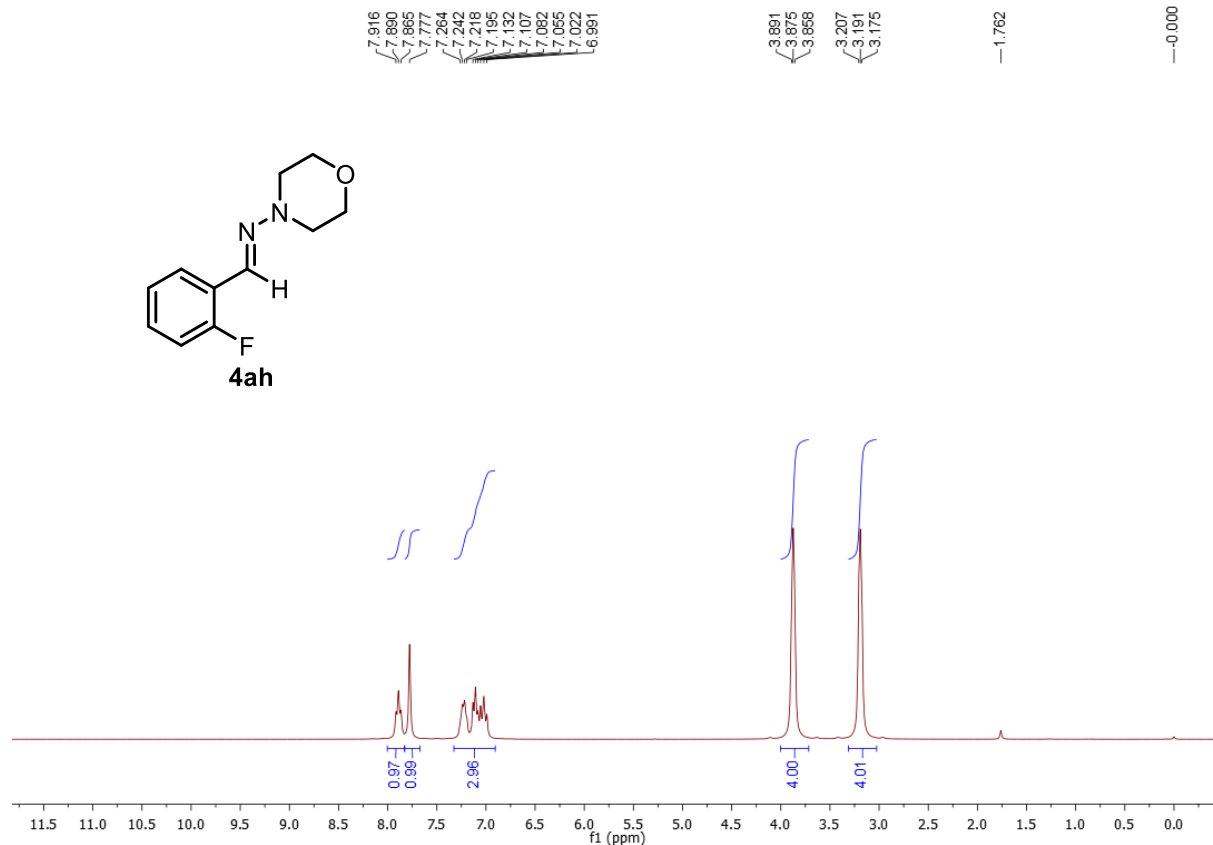

# <sup>13</sup>C NMR (75 MHz, CDCl<sub>3</sub>)

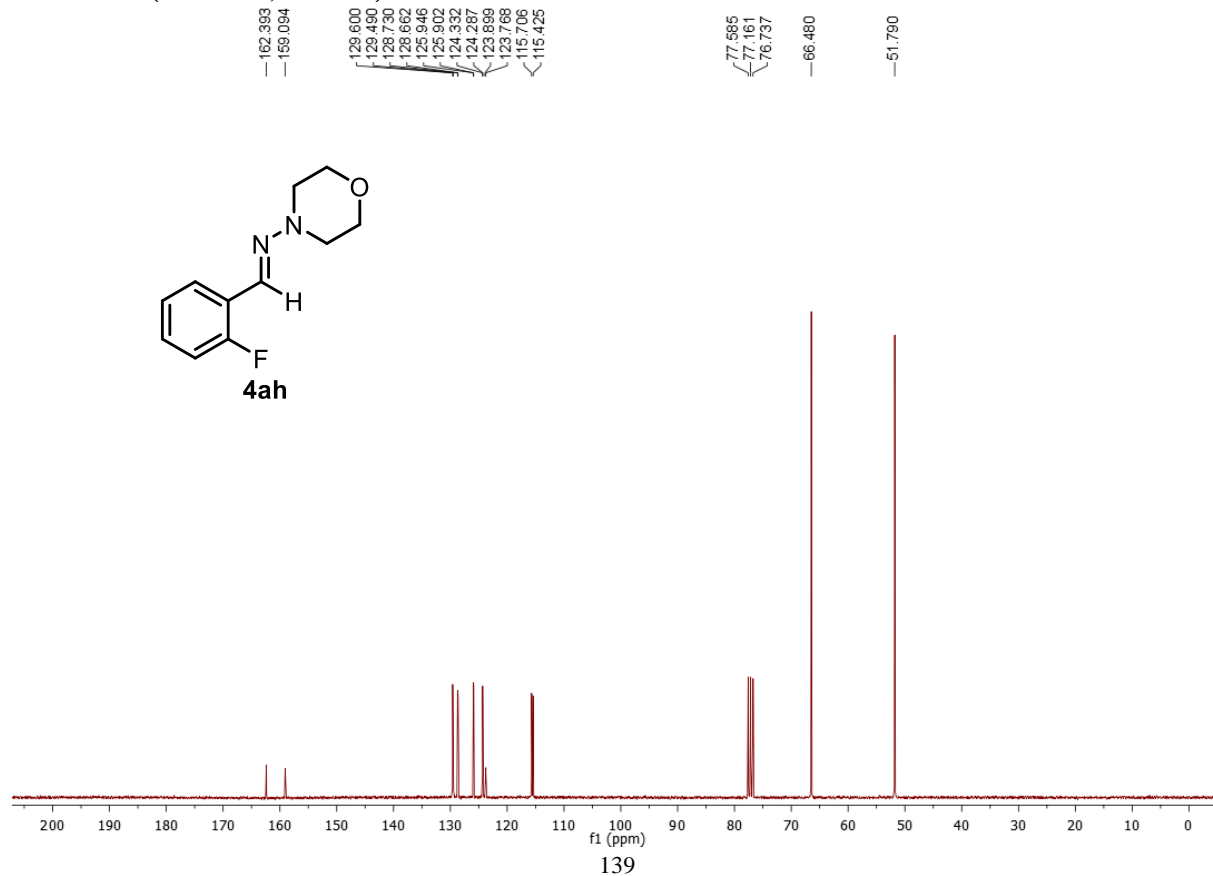



# <sup>1</sup>H NMR (300 MHz, CDCl<sub>3</sub>)

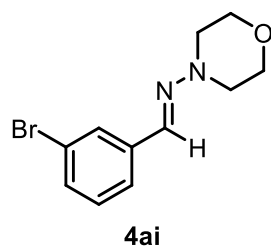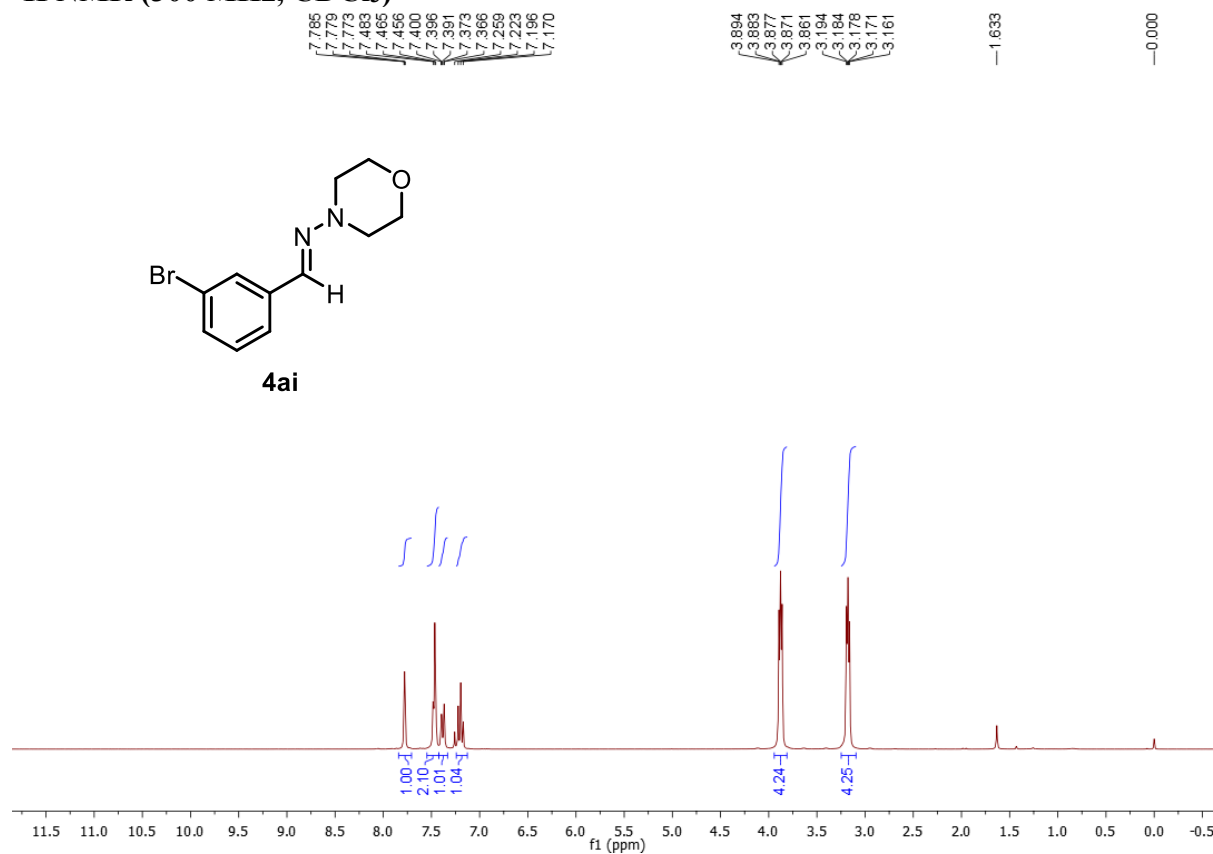

# <sup>13</sup>C NMR (75 MHz, CDCl<sub>3</sub>)

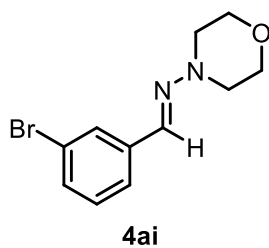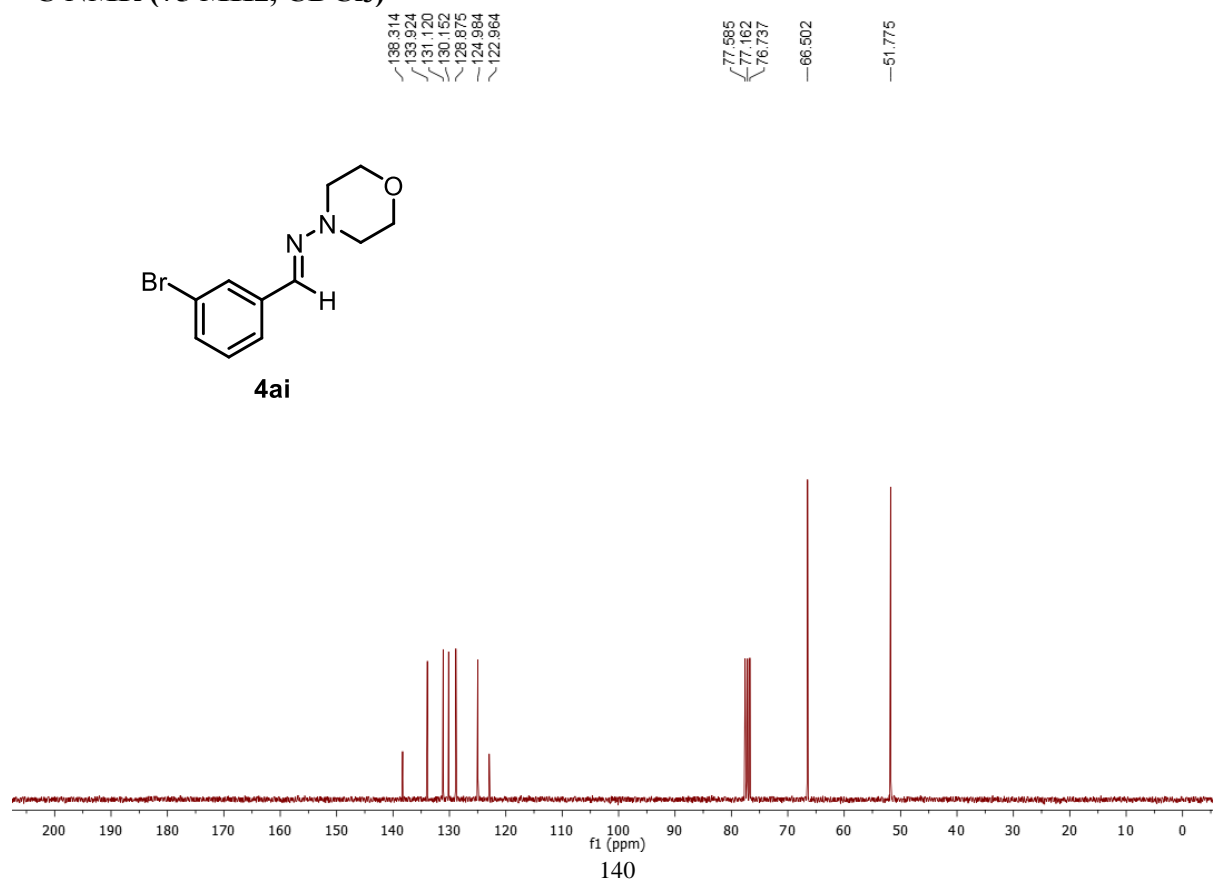

# <sup>1</sup>H NMR (300 MHz, CDCl<sub>3</sub>)

7.791, 7.780, 7.769, 7.760, 7.185, 7.177, 7.170, 7.163, 7.154, 7.145, 7.139, 7.130, 7.121, 7.113, 7.109, 7.099, 3.877, 3.866, 3.861, 3.854, 3.844, 3.165, 3.155, 3.148, 3.142, 3.132, -2.403

-0.000

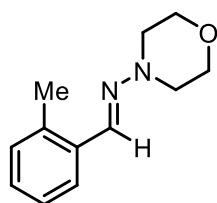

4aj

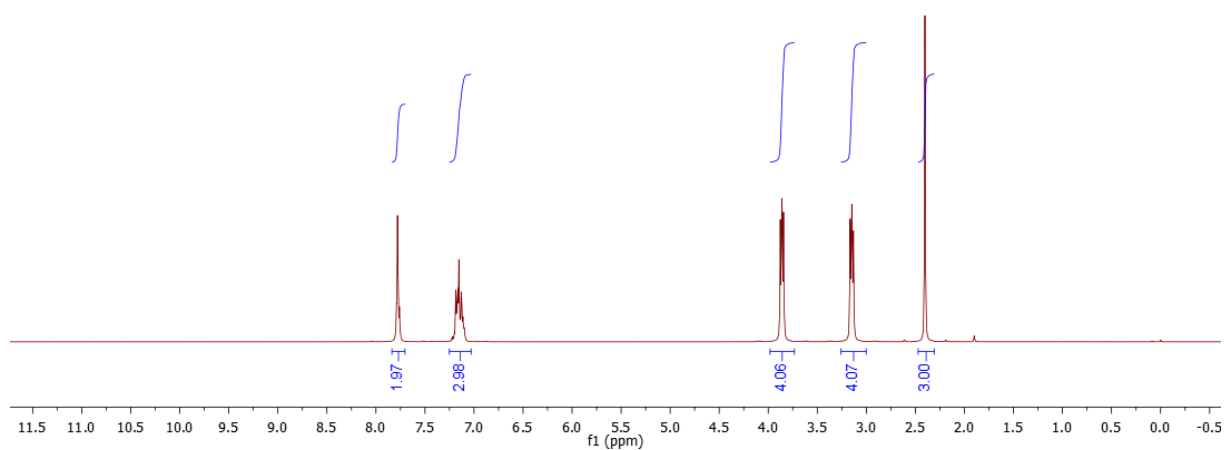

# <sup>13</sup>C NMR (75 MHz, CDCl<sub>3</sub>)

135.447, 134.790, 133.800, 130.565, 128.146, 125.613

77.583, 77.159, 76.734

-66.443

-51.974

-19.566

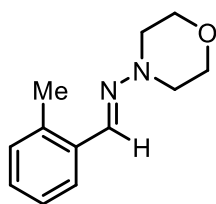

4aj

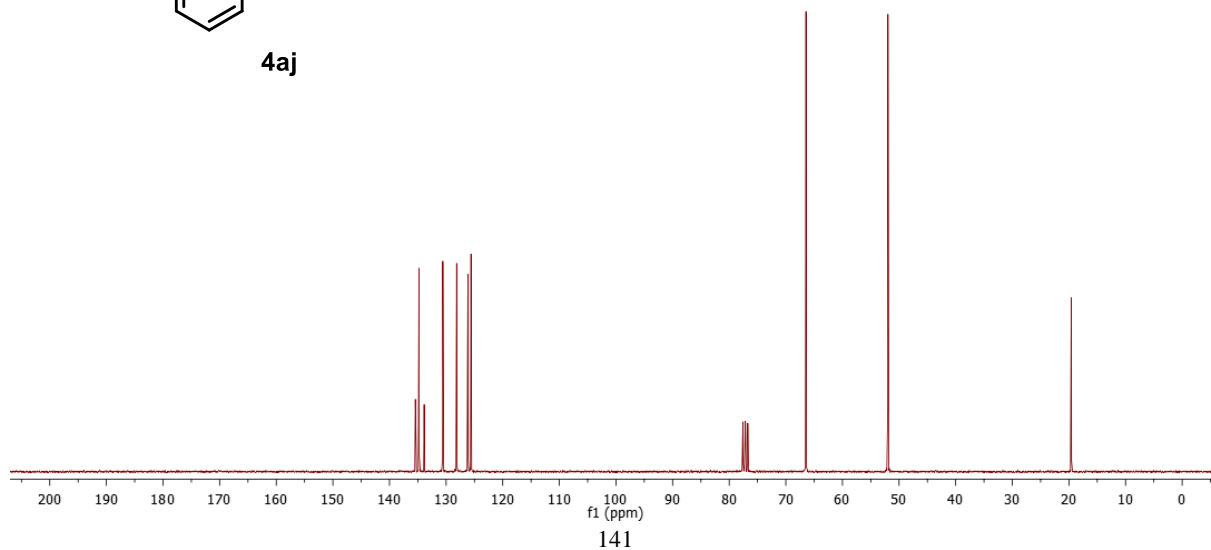

# <sup>1</sup>H NMR (300 MHz, CDCl<sub>3</sub>)

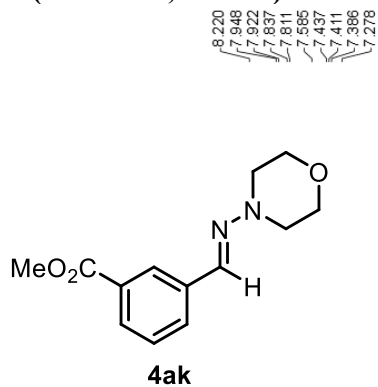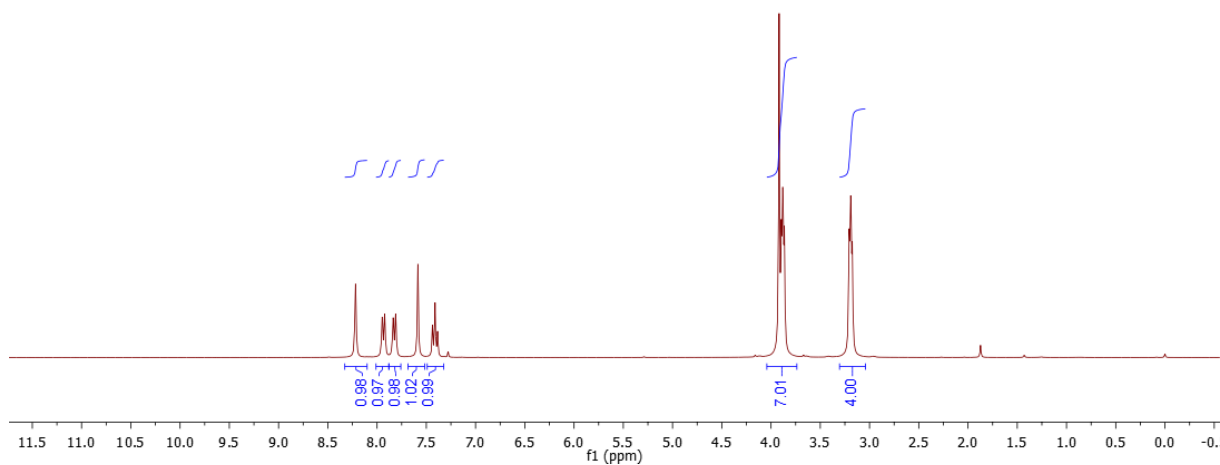

# <sup>13</sup>C NMR (75 MHz, CDCl<sub>3</sub>)

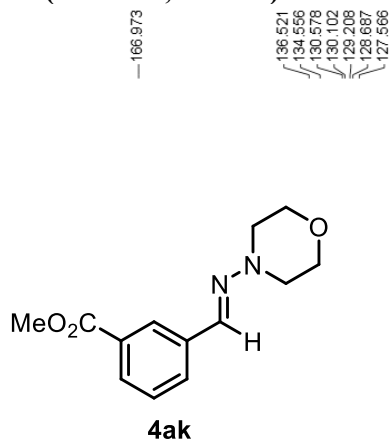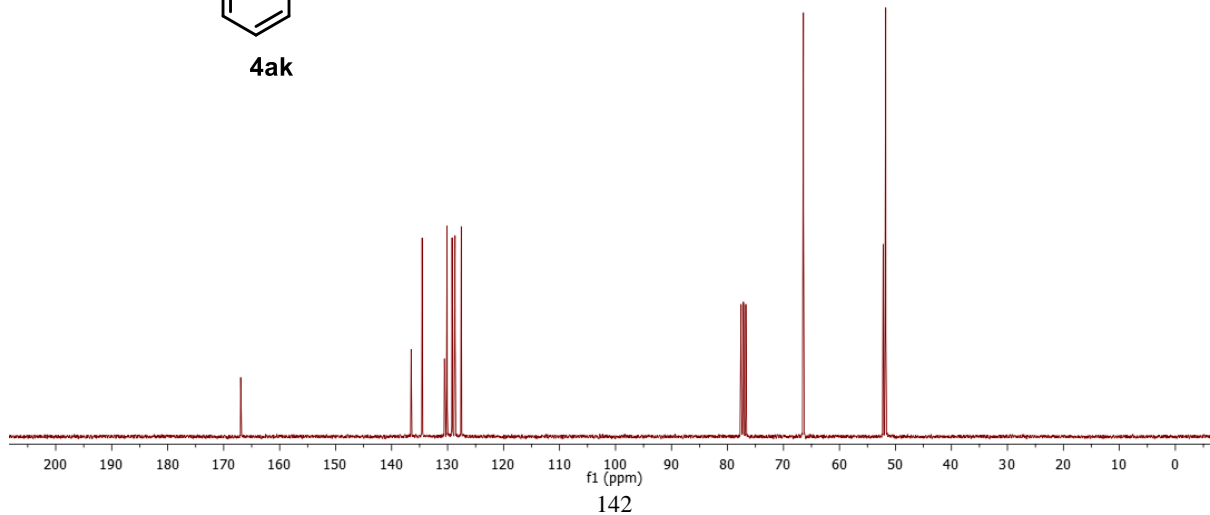

### $^1\text{H}$ NMR (300 MHz, $\text{CDCl}_3$ )

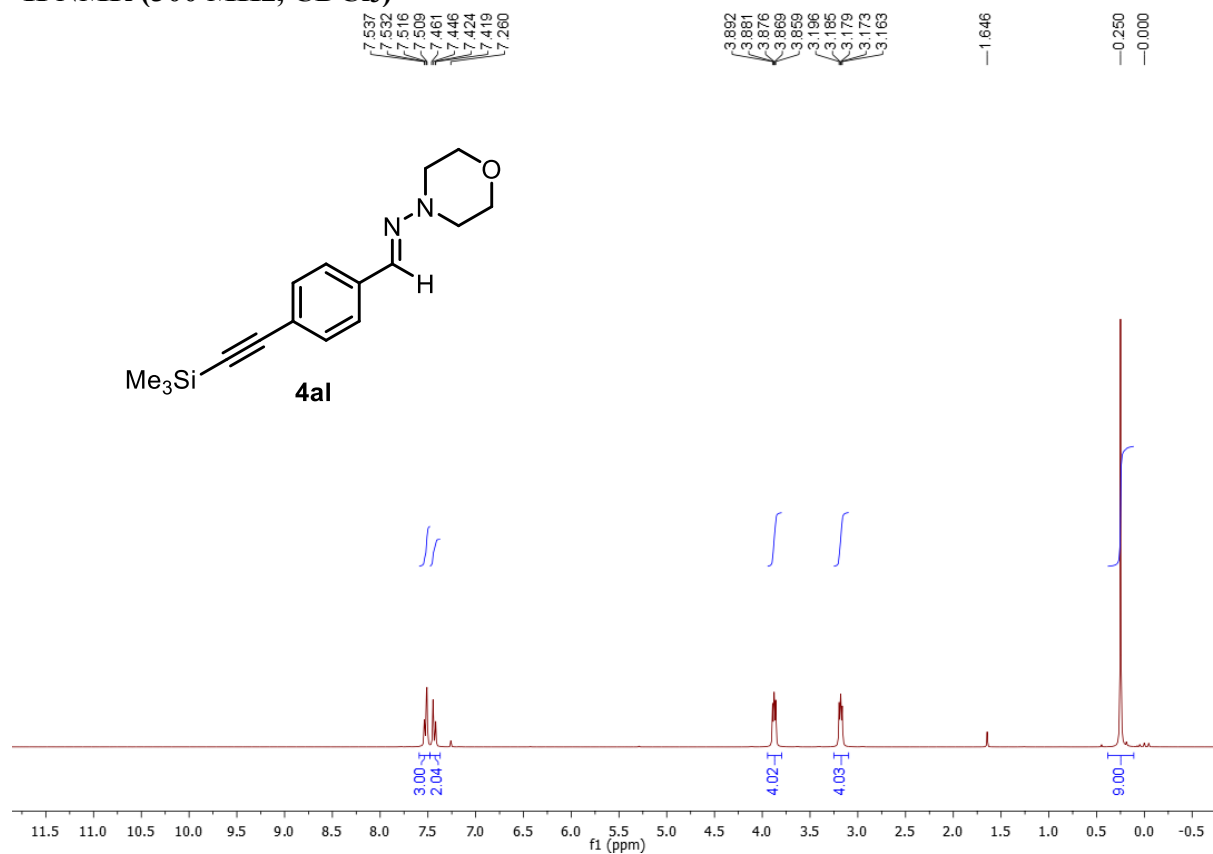

### $^{13}\text{C}$ NMR (75 MHz, $\text{CDCl}_3$ )

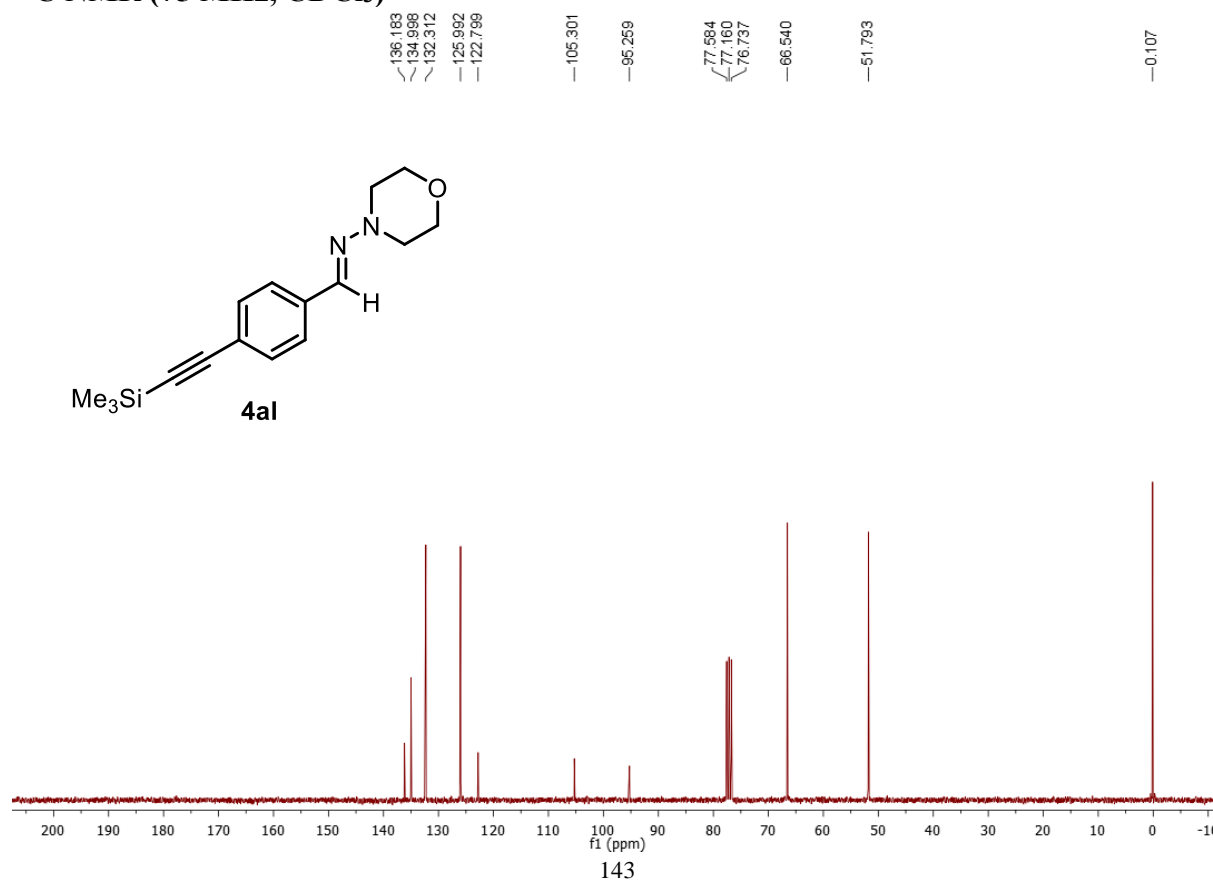

# <sup>1</sup>H NMR (300 MHz, CDCl<sub>3</sub>)

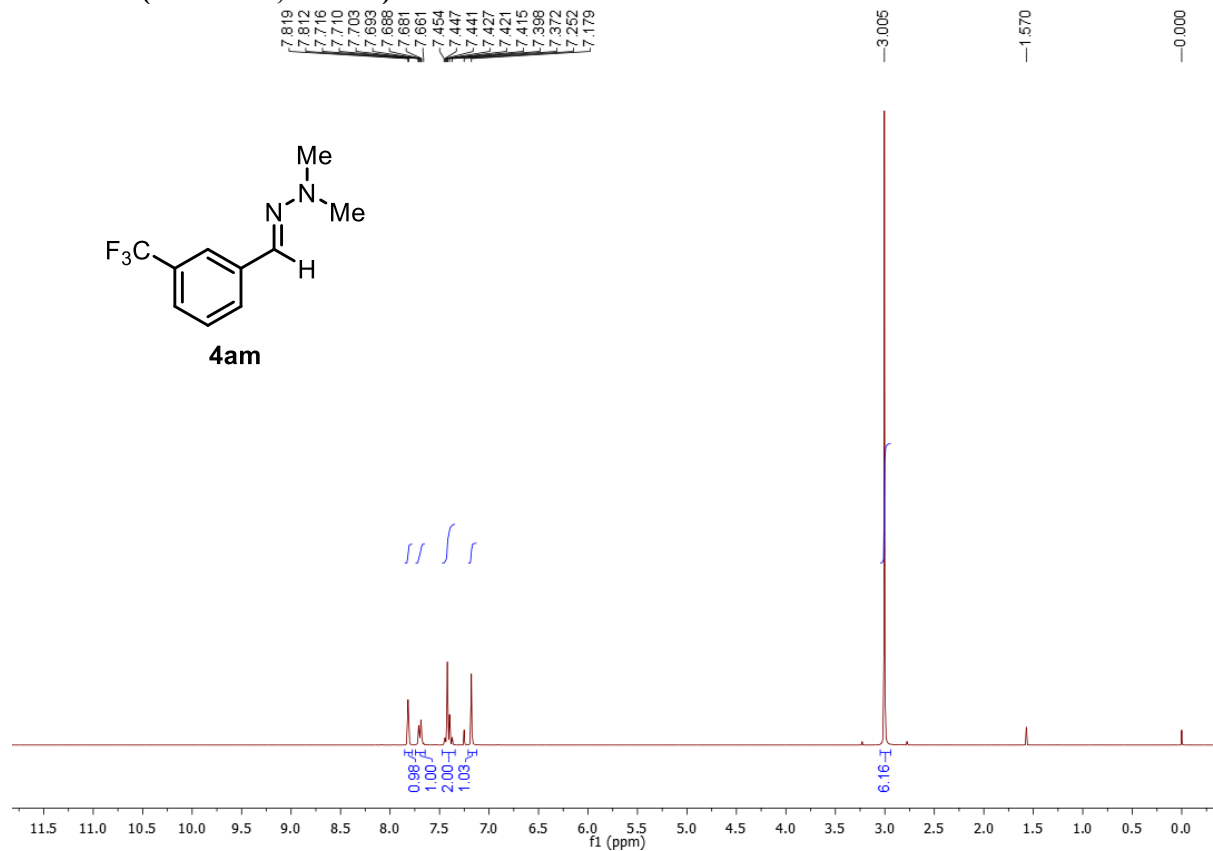

# <sup>13</sup>C NMR (75 MHz, CDCl<sub>3</sub>)

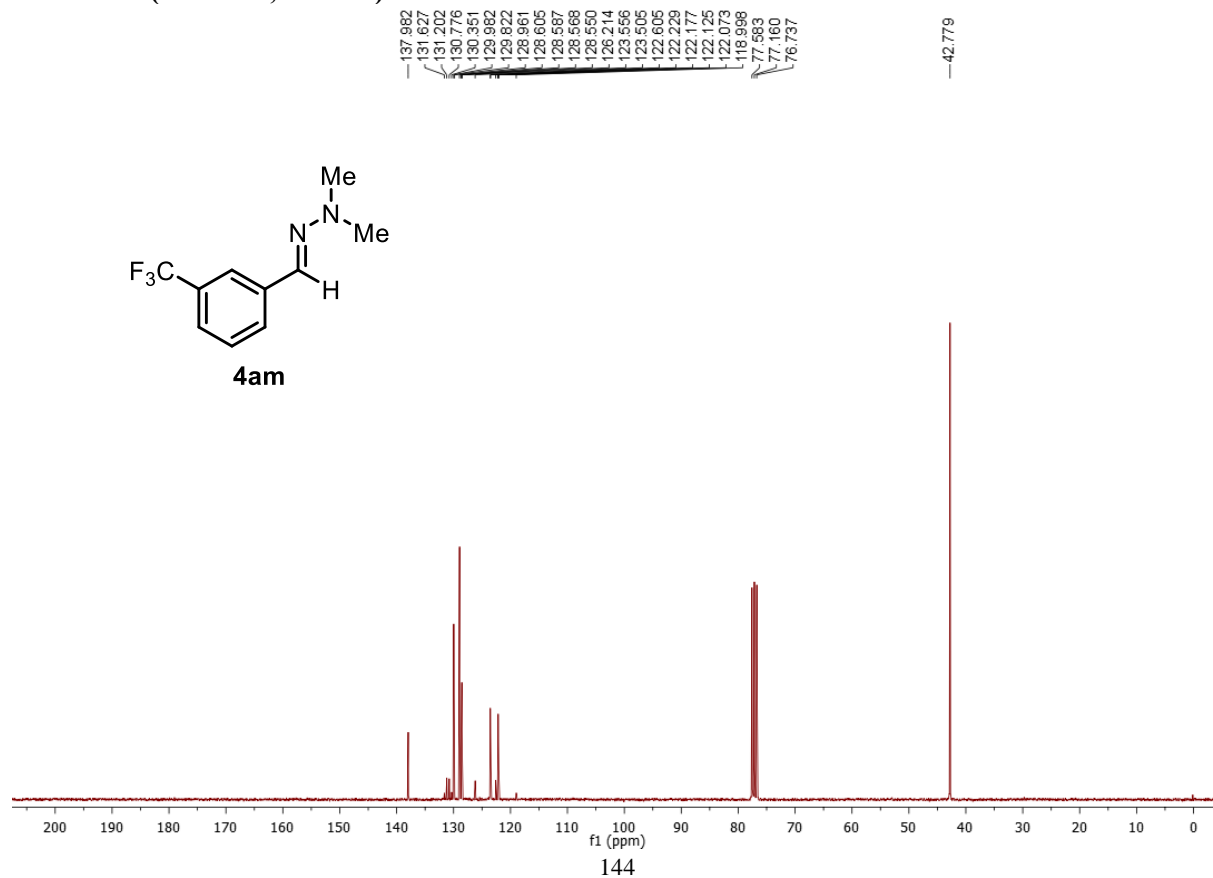

# <sup>1</sup>H NMR (300 MHz, CDCl<sub>3</sub>)

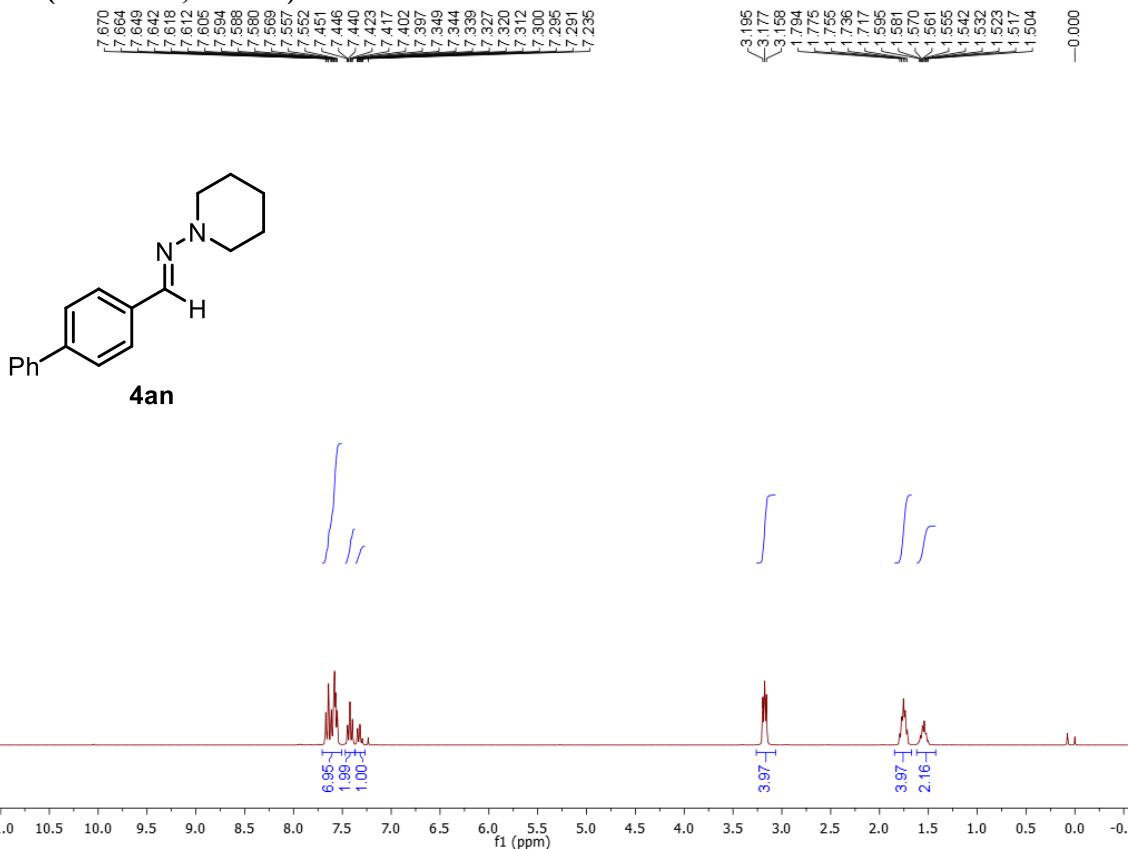

# <sup>13</sup>C NMR (75 MHz, CDCl<sub>3</sub>)

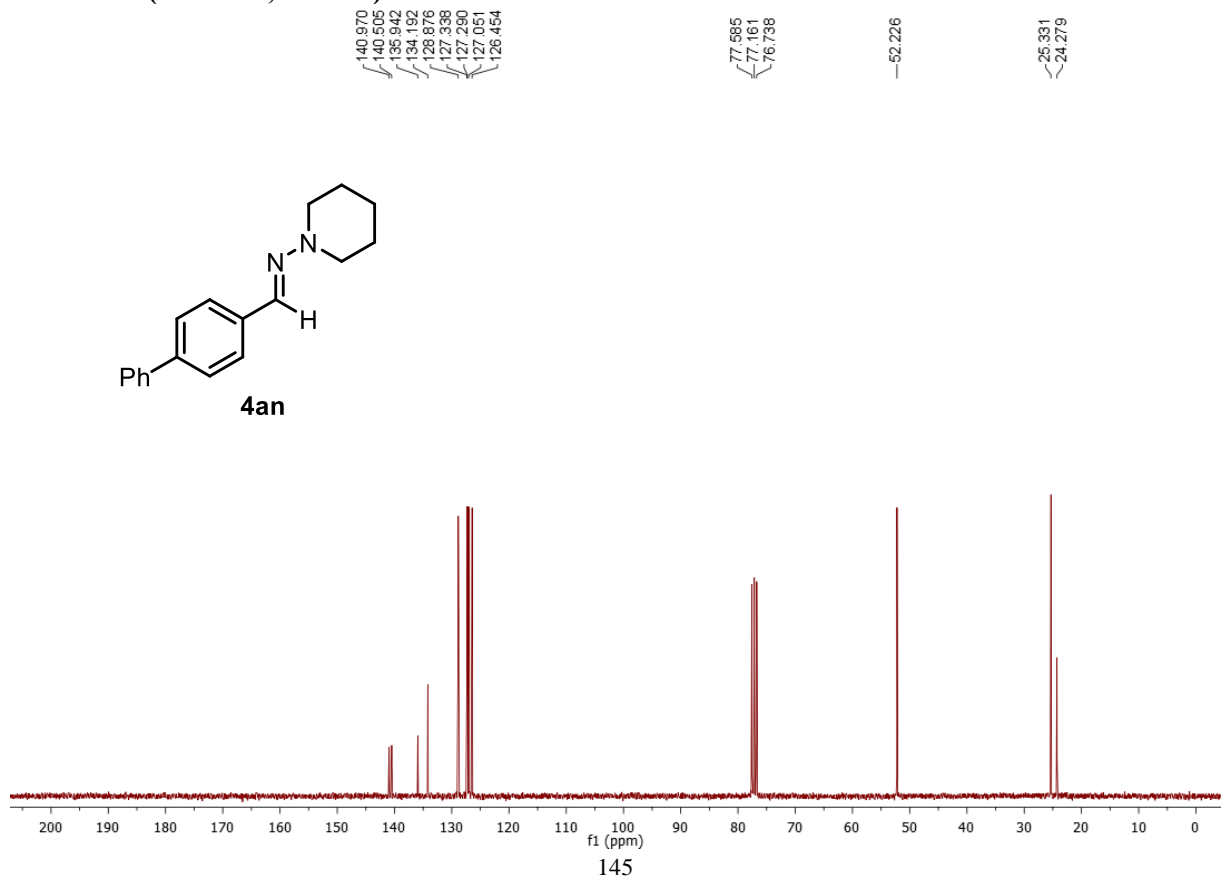

# <sup>1</sup>H NMR (300 MHz, CDCl<sub>3</sub>)

7.696  
7.689  
7.683  
7.668  
7.661  
7.654  
7.620  
7.615  
7.608  
7.597  
7.592  
7.586  
7.579  
7.564  
7.558  
7.551  
7.457  
7.453  
7.449  
7.441  
7.433  
7.429  
7.423  
7.411  
7.404  
7.397  
7.398  
7.353  
7.348  
7.336  
7.329  
7.321  
7.309  
7.304  
7.300  
7.232  
7.225  
7.214  
7.211  
7.207  
7.203  
7.198  
7.184  
7.178  
7.174  
7.170

— 1.510

— 0.000

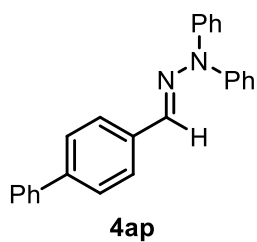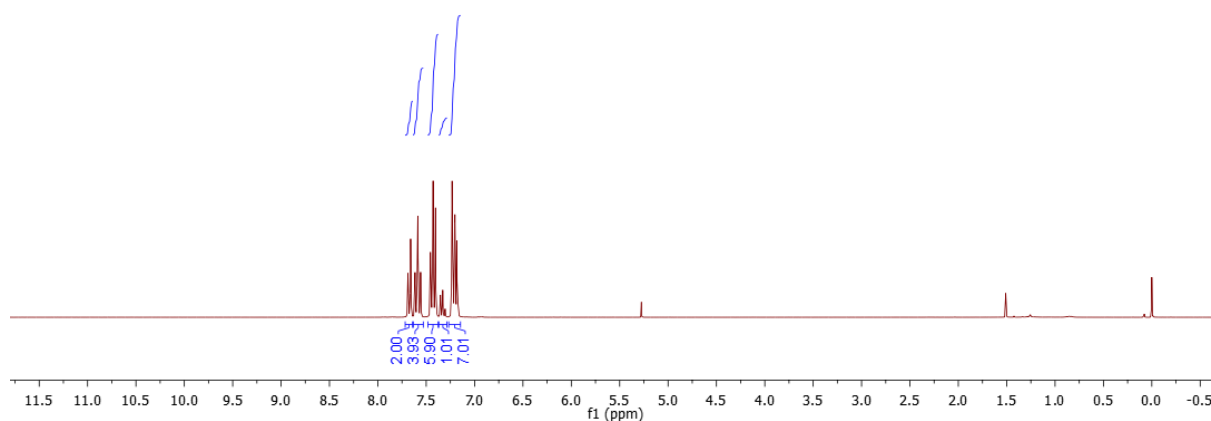

# <sup>13</sup>C NMR (75 MHz, CDCl<sub>3</sub>)

143.771  
140.871  
140.839  
135.365  
135.220  
129.951  
128.931  
127.475  
127.342  
127.067  
126.840  
124.698  
122.680

77.583  
77.159  
76.736

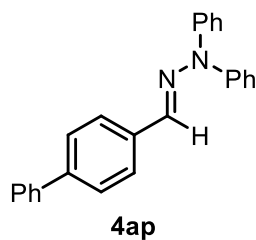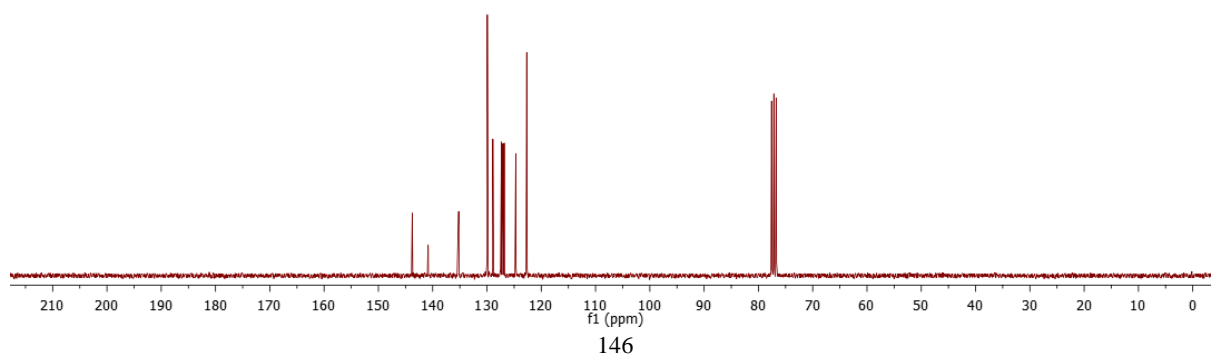

# <sup>1</sup>H NMR (300 MHz, CDCl<sub>3</sub>)

7.382  
7.357  
7.351  
7.336  
7.332  
7.328  
7.266  
7.255  
7.253  
7.242  
7.231  
7.224  
7.218  
7.212  
7.204  
7.197  
7.184  
7.178  
7.175  
7.170  
7.161  
7.155  
7.149  
6.996  
6.987  
6.983  
6.978  
6.968  
6.961  
6.955  
6.456  
6.452  
6.448  
6.436  
6.429  
6.424

4.447  
4.250  
4.226  
4.202  
4.178

1.815

1.221  
1.197  
1.173

0.000

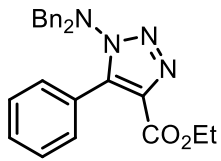

5a

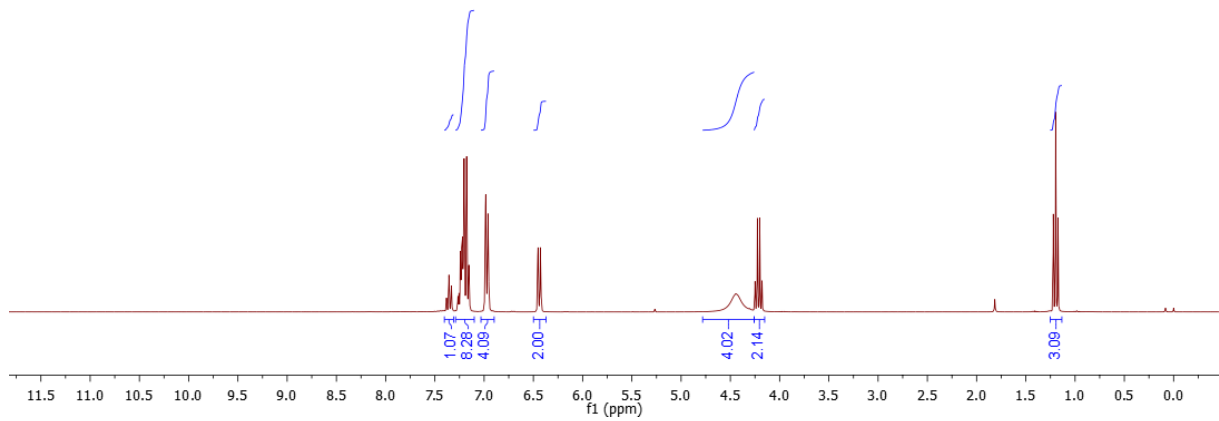

# <sup>13</sup>C NMR (75 MHz, CDCl<sub>3</sub>)

160.894

141.656

134.901

134.655

130.070

129.655

129.388

128.579

128.192

127.270

125.155

77.586

77.161

76.737

62.264

60.968

14.032

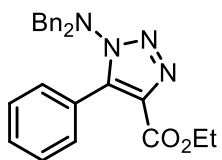

5a

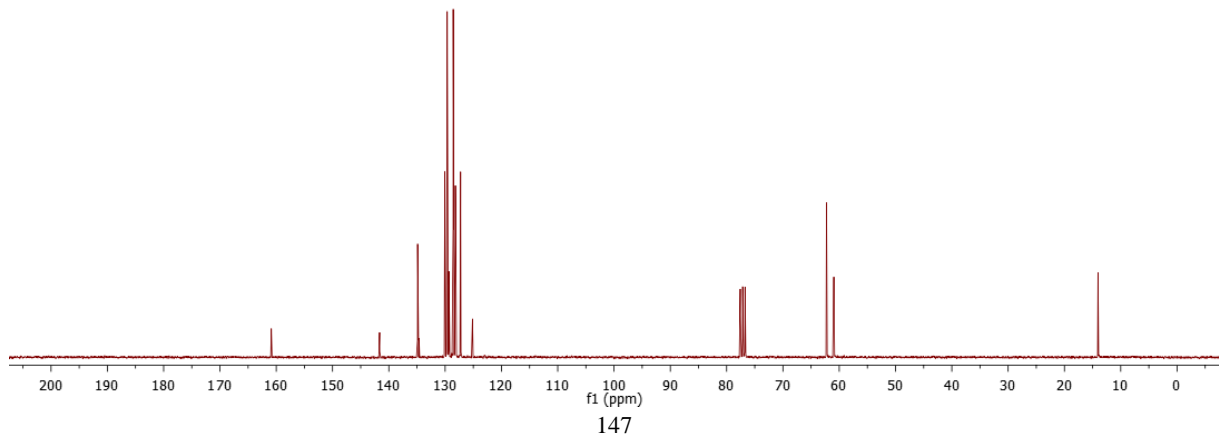



**<sup>1</sup>H NMR (400 MHz, CDCl<sub>3</sub>, 50 °C)**

7.221  
7.215  
7.208  
7.204  
7.200  
7.187  
7.173  
7.168  
7.156  
7.151  
7.147  
7.030  
7.010  
6.994  
6.990  
6.975  
6.970  
6.426  
6.421  
6.411  
6.406

4.426  
4.241  
4.223  
4.206  
4.188

-2.367

1.227  
1.209  
1.191

-0.000

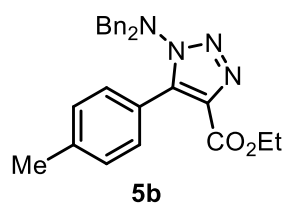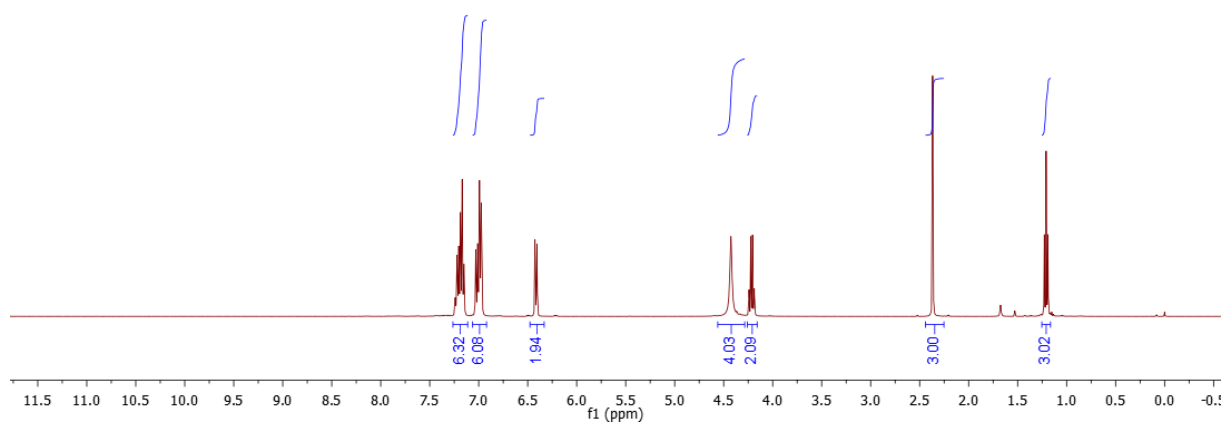

**<sup>13</sup>C NMR (75 MHz, CDCl<sub>3</sub>)**

160.973  
141.821  
139.391  
134.939  
134.591  
133.950  
133.688  
128.563  
128.163  
128.040  
122.069

77.585  
77.160  
76.737

-62.263  
-60.961

-21.514

-14.104

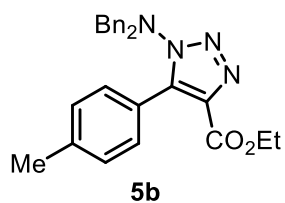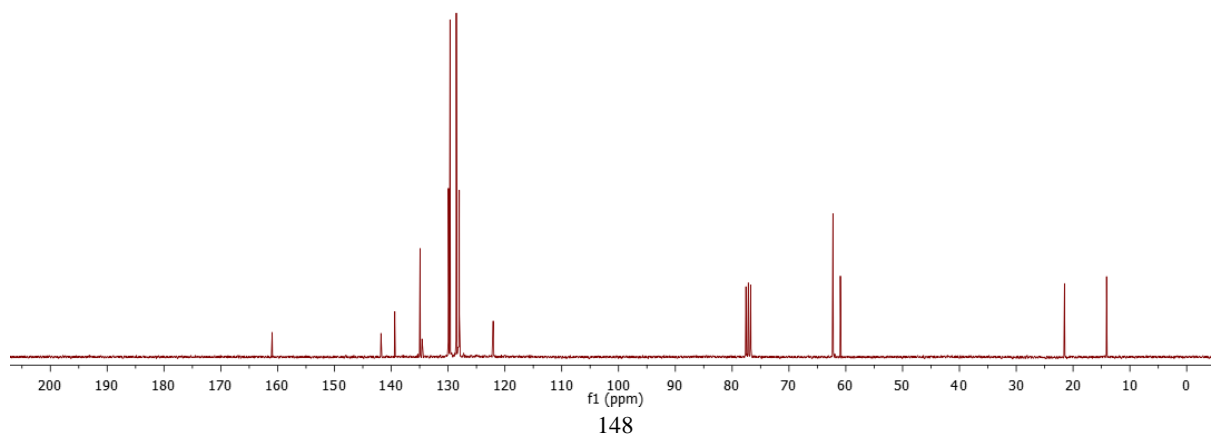

# <sup>1</sup>H NMR (400 MHz, CDCl<sub>3</sub>, 50 °C)

7.252, 7.233, 7.227, 7.219, 7.216, 7.212, 7.202, 7.195, 7.192, 7.181, 7.177, 7.176, 7.172, 7.164, 7.160, 7.156, 6.978, 6.973, 6.969, 6.965, 6.958, 6.952, 6.948, 6.886, 6.881, 6.869, 6.864, 6.859, 6.848, 6.840, 6.402, 6.400, 6.397, 6.389, 6.386, 6.380, 6.372, 6.367, 6.359, 4.443, 4.235, 4.218, 4.200, 4.182

1.220, 1.202, 1.196, 1.184, 1.178, 1.172

-0.000

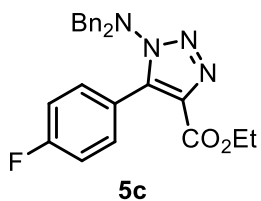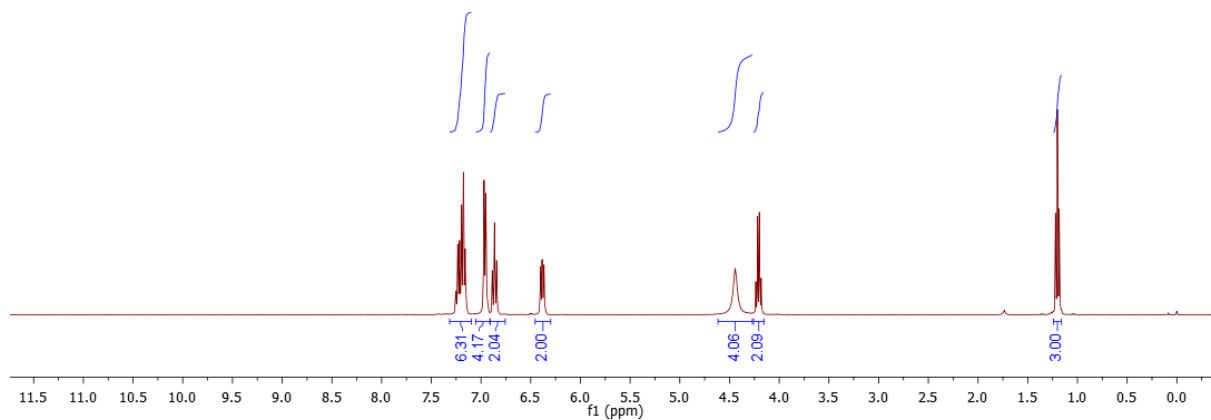

# <sup>13</sup>C NMR (100 MHz, CDCl<sub>3</sub>)

164.538, 162.056, 160.833, 140.887, 134.781, 134.643, 132.157, 132.073, 129.716, 128.629, 128.265, 121.044, 121.009, 114.530, 114.313

77.477, 77.158, 76.859

62.481, 61.067

-14.050

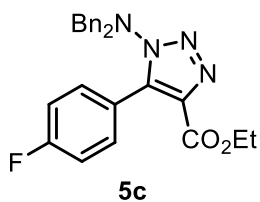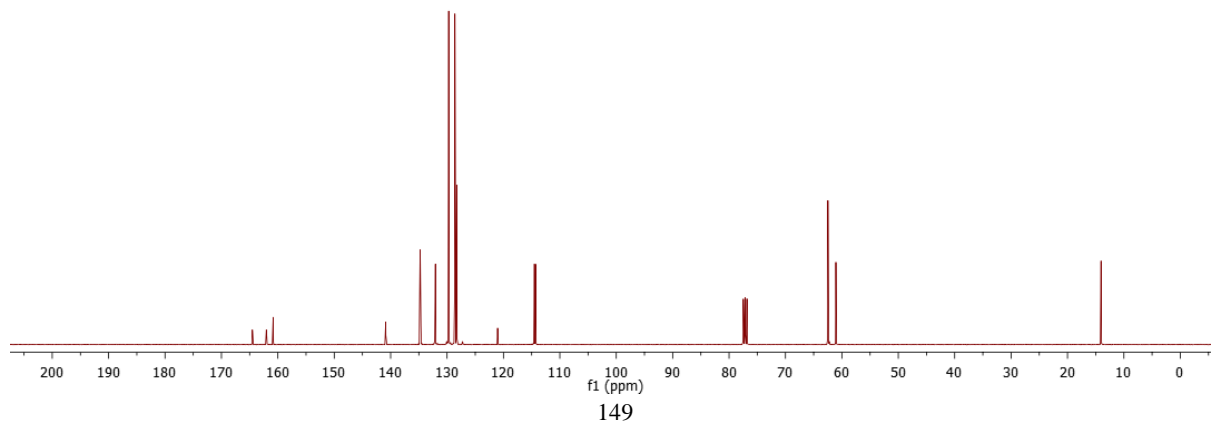

# <sup>1</sup>H NMR (400 MHz, CDCl<sub>3</sub>, 50 °C)

7.255  
7.252  
7.245  
7.237  
7.231  
7.223  
7.219  
7.215  
7.203  
7.199  
7.187  
7.184  
7.183  
7.179  
7.175  
7.166  
7.162  
7.158  
7.154  
7.149  
7.137  
7.133  
7.127  
6.975  
6.969  
6.966  
6.962  
6.954  
6.949  
6.945  
6.933  
6.916  
6.911  
6.900  
6.895  
6.889

4.447  
4.237  
4.219  
4.202  
4.184

1.226  
1.206  
1.190

-0.000

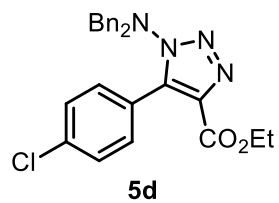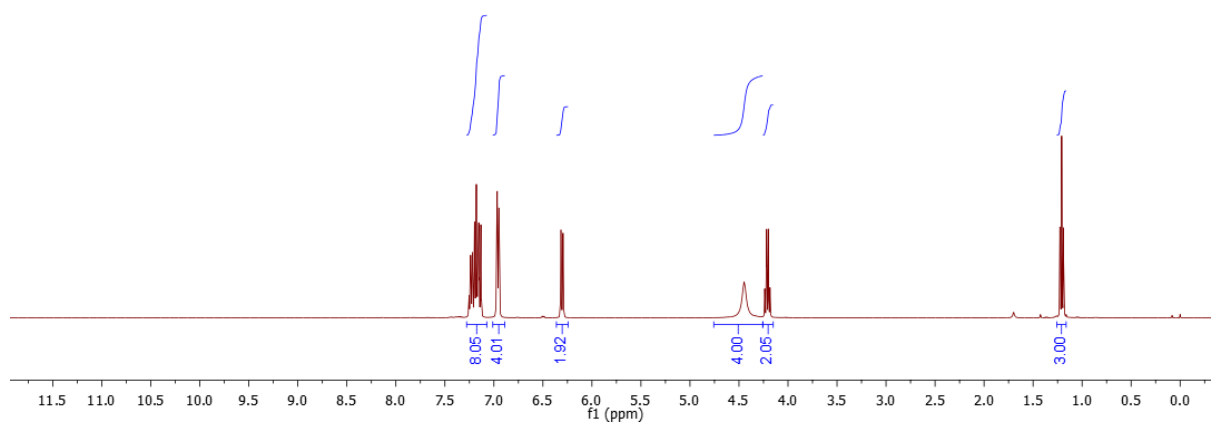

# <sup>13</sup>C NMR (75 MHz, CDCl<sub>3</sub>)

160.744  
140.763  
135.566  
134.705  
134.654  
131.407  
129.747  
128.649  
128.325  
127.520  
123.498

77.583  
77.160  
76.736  
62.559  
61.116

14.058

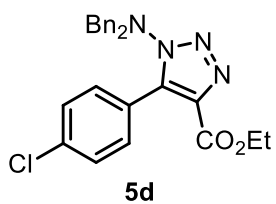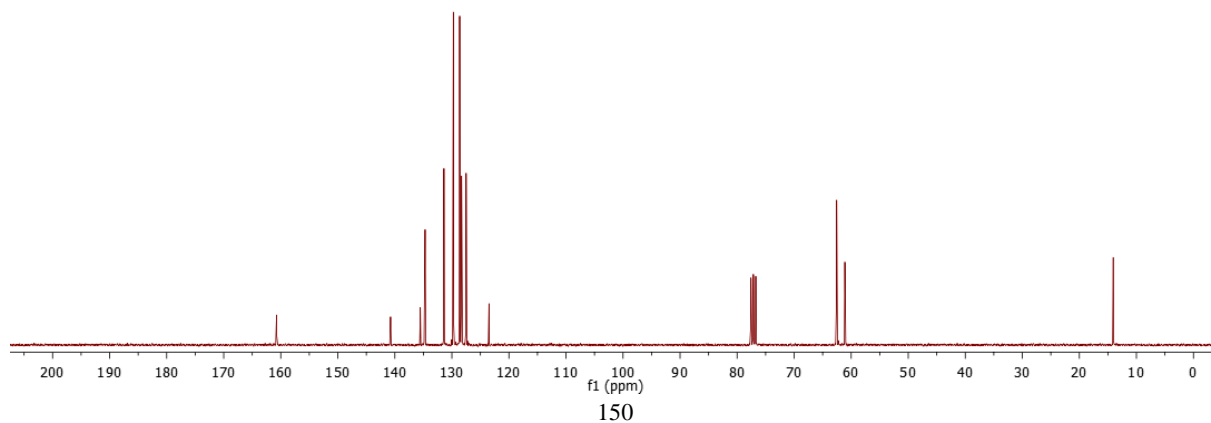

**<sup>1</sup>H NMR (400 MHz, CDCl<sub>3</sub>, 50 °C)**

7.310  
7.305  
7.293  
7.288  
7.283  
7.257  
7.252  
7.246  
7.239  
7.232  
7.224  
7.221  
7.217  
7.205  
7.201  
7.199  
7.185  
7.186  
7.181  
7.179  
7.175  
7.168  
7.163  
7.159  
6.965  
6.961  
6.954  
6.948  
6.944  
6.241  
6.236  
6.224  
6.219  
6.213

4.447  
4.239  
4.221  
4.204  
4.186

1.230  
1.212  
1.194

-0.000

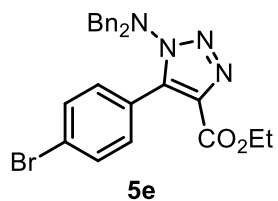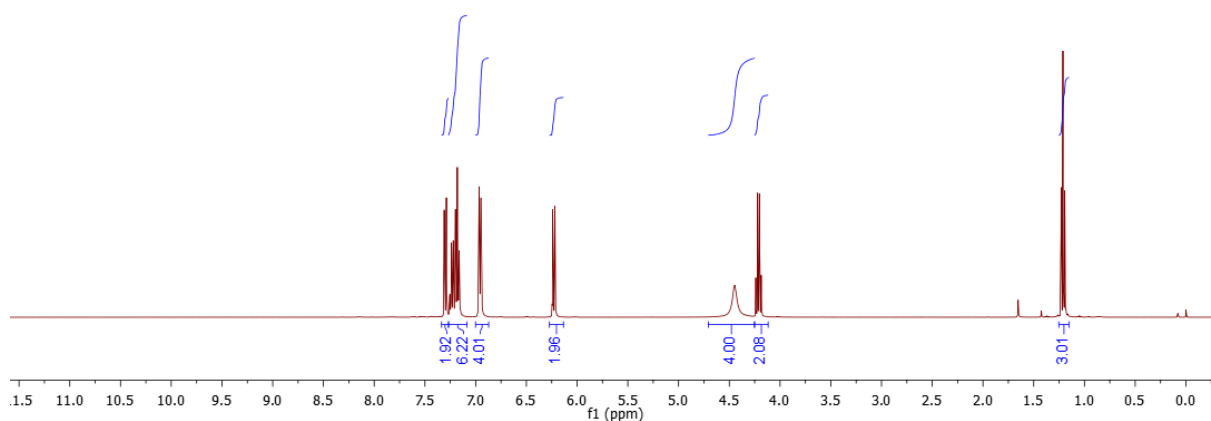

**<sup>13</sup>C NMR (100 MHz, CDCl<sub>3</sub>, 50 °C)**

160.774  
140.700  
134.888  
134.846  
131.776  
130.565  
128.811  
128.691  
128.362  
124.259  
123.959

77.478  
77.160  
76.842

62.676  
61.043

-14.086

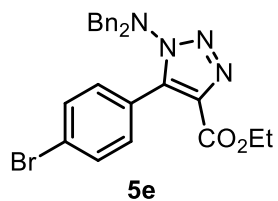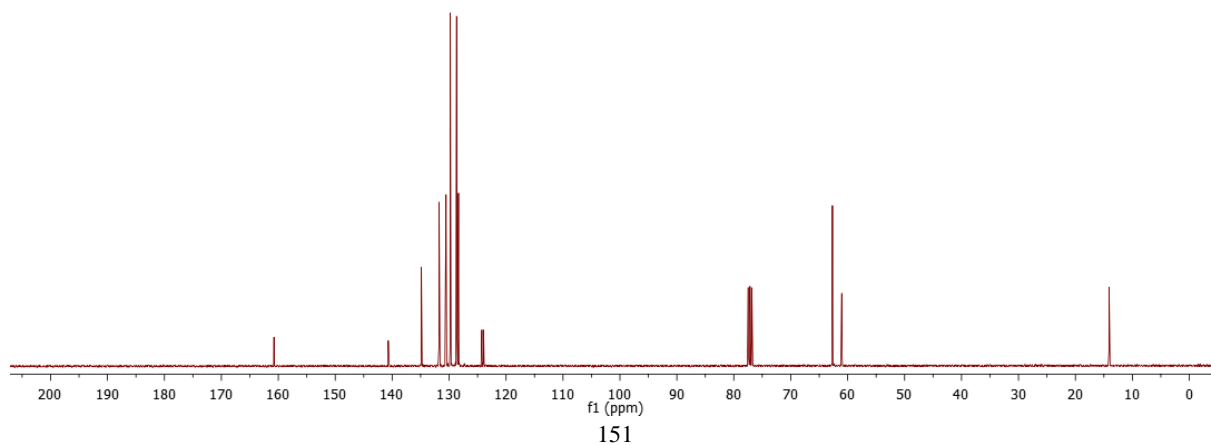

# <sup>1</sup>H NMR (400 MHz, CDCl<sub>3</sub>, 50 °C)

7.424  
7.420  
7.418  
7.415  
7.403  
7.400  
7.398  
7.395  
7.283  
7.270  
7.267  
7.265  
7.259  
7.249  
7.246  
7.242  
7.210  
7.208  
7.204  
7.183  
7.180  
7.176  
7.171  
7.168  
6.943  
6.940  
6.937  
6.924  
6.839  
6.800  
6.578  
6.575  
6.563  
6.560  
6.558  
6.555

4.479  
4.238  
4.220  
4.202  
4.185

1.222  
1.204  
1.187

-0.000

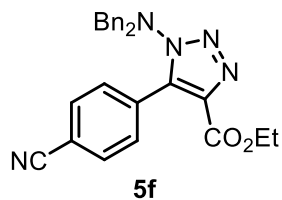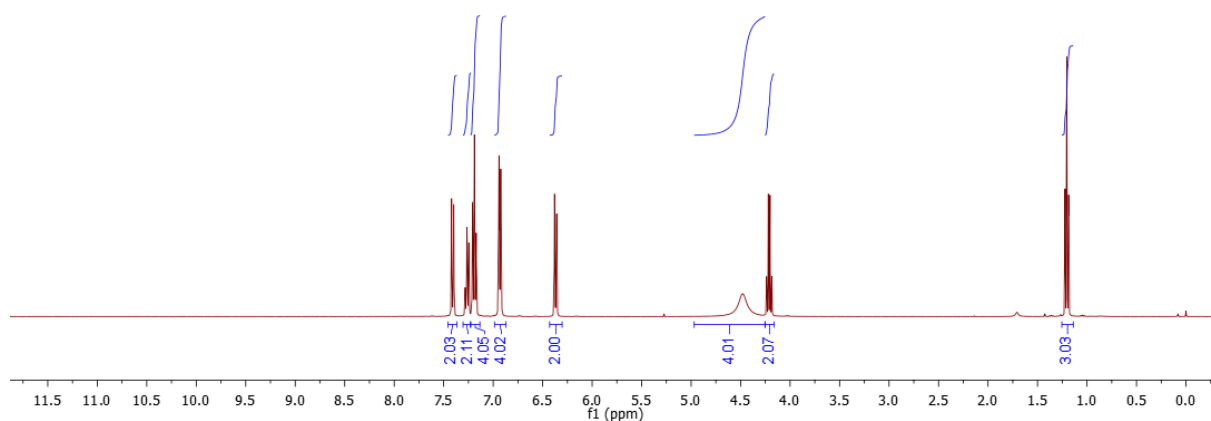

# <sup>13</sup>C NMR (75 MHz, CDCl<sub>3</sub>)

160.462  
140.131  
134.780  
134.502  
130.783  
130.760  
128.799  
128.759  
128.718  
128.483  
118.332  
112.963

77.587  
77.163  
76.757  
62.783  
61.296

13.995

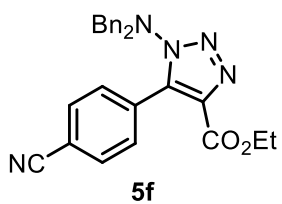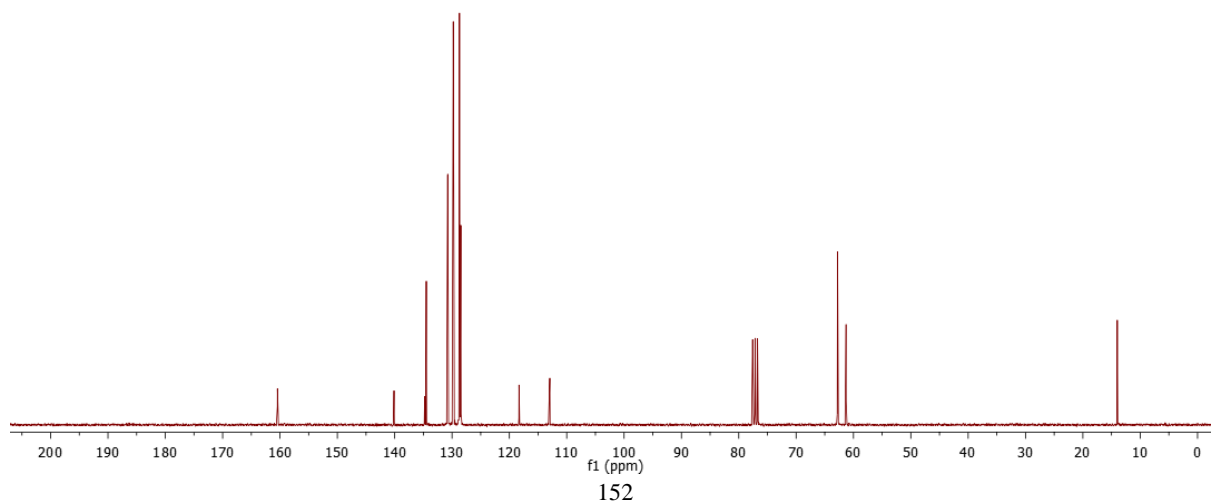

# <sup>1</sup>H NMR (400 MHz, CDCl<sub>3</sub>, 50 °C)

7.625, 7.623, 7.619, 7.614, 7.606, 7.605, 7.602, 7.599, 7.473, 7.470, 7.466, 7.452, 7.448, 7.443, 7.437, 7.433, 7.431, 7.427, 7.422, 7.384, 7.381, 7.377, 7.363, 7.362, 7.248, 7.248, 7.230, 7.227, 7.224, 7.216, 7.212, 7.208, 7.197, 7.192, 7.191, 7.187, 7.176, 7.172, 7.167, 7.159, 7.155, 7.151, 7.014, 7.008, 7.005, 7.001, 6.993, 6.988, 6.984, 6.606, 6.601, 6.596, 6.585, 6.582, 6.580, 6.575, 4.456, 4.261, 4.243, 4.226, 4.208, 4.208, 1.217, 1.199, -0.000

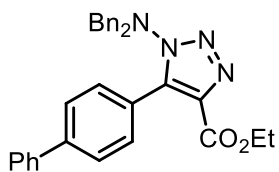

5g

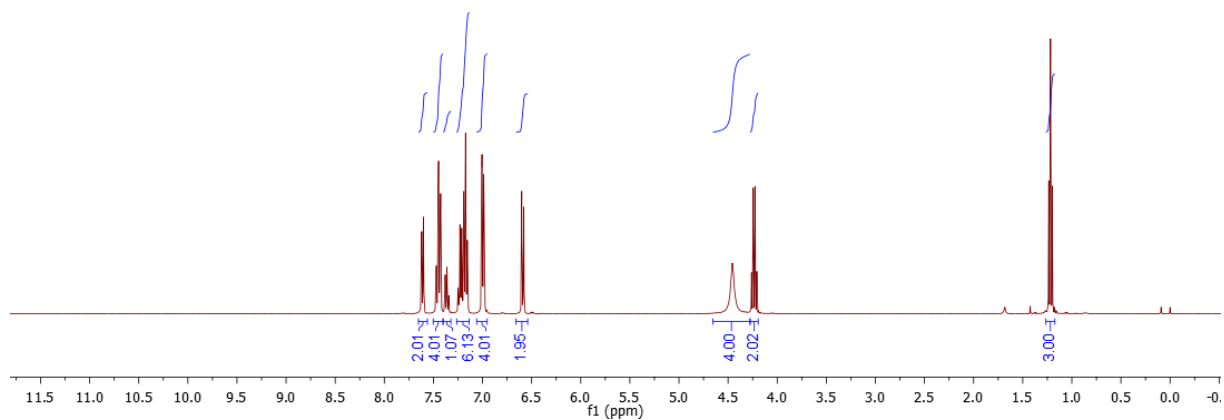

# <sup>13</sup>C NMR (75 MHz, CDCl<sub>3</sub>)

160.973, 142.052, 141.492, 140.408, 134.894, 134.649, 130.567, 129.706, 128.940, 128.608, 128.234, 127.820, 127.174, 125.911, 123.976, 77.584, 77.161, 76.736, 62.367, 61.064, -14.105

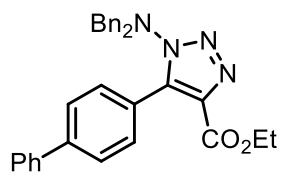

5g

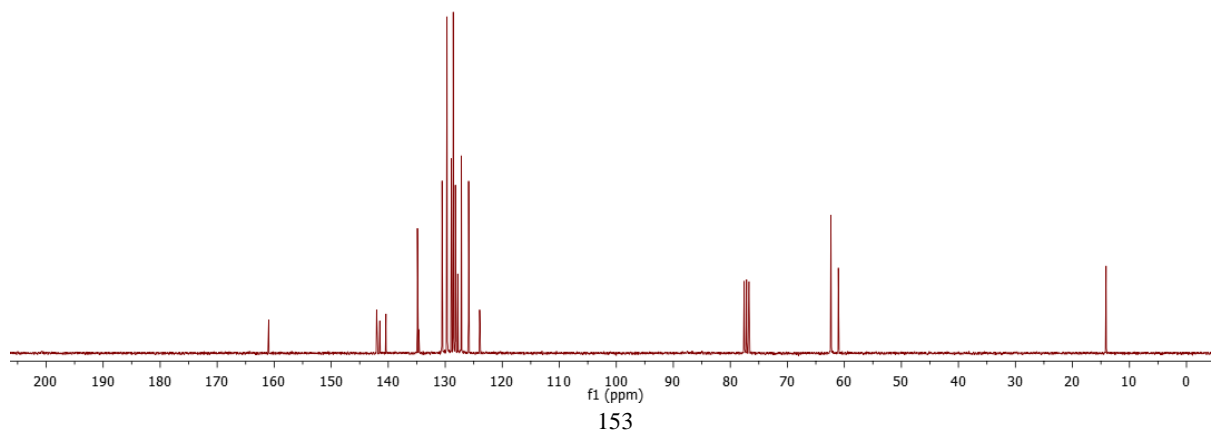

# <sup>1</sup>H NMR (400 MHz, CDCl<sub>3</sub>, 50 °C)

7.241, 7.237, 7.233, 7.227, 7.219, 7.212, 7.205, 7.201, 7.197, 7.189, 7.185, 7.175, 7.170, 7.165, 7.158, 7.154, 7.148, 7.008, 7.002, 6.998, 6.994, 6.988, 6.982, 6.978, 6.759, 6.752, 6.747, 6.735, 6.730, 6.723, 6.506, 6.498, 6.493, 6.482, 6.476, 6.469, 4.429, 4.248, 4.230, 4.213, 4.195, -3.817

1.239, 1.221, 1.203

-0.000

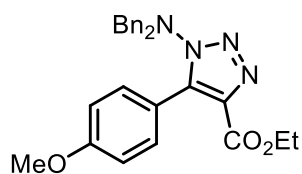

5h

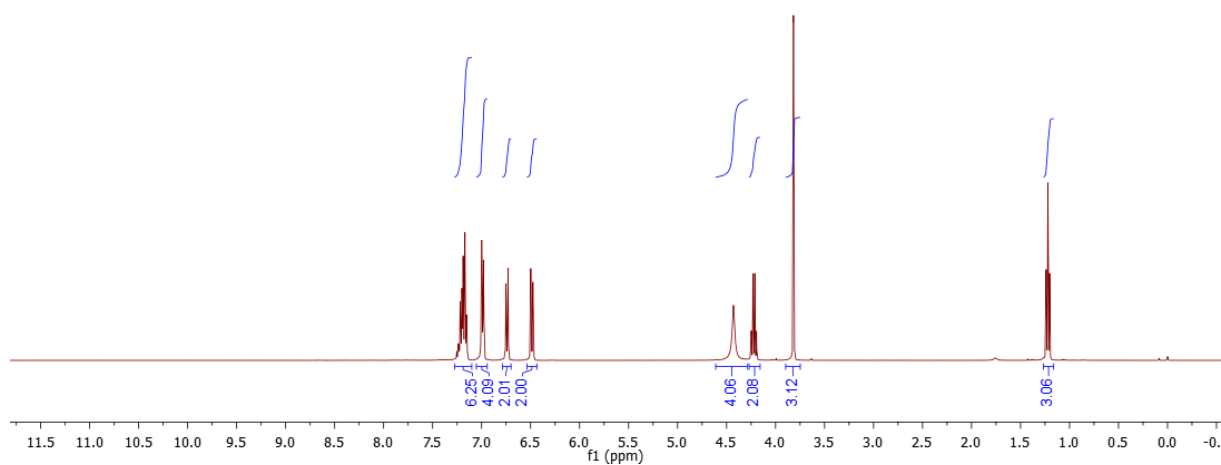

# <sup>13</sup>C NMR (75 MHz, CDCl<sub>3</sub>)

161.036, 160.421, 141.540, 134.931, 134.418, 131.582, 129.625, 128.551, 128.152, 117.106, 112.791

77.477, 77.159, 76.841

62.239, 60.941, 55.313

14.122

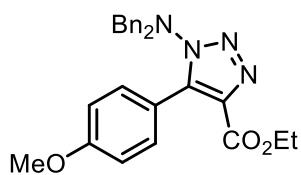

5h

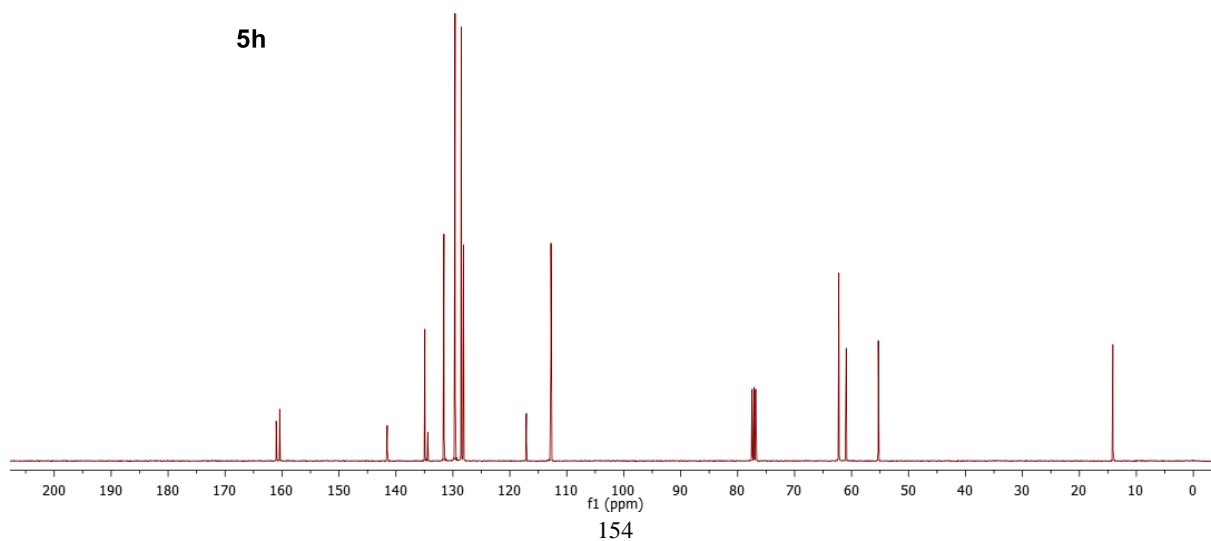

# <sup>1</sup>H NMR (400 MHz, CDCl<sub>3</sub>, 50 °C)

7.851  
7.847  
7.845  
7.842  
7.830  
7.825  
7.821  
7.269  
7.266  
7.262  
7.254  
7.247  
7.241  
7.233  
7.229  
7.225  
7.196  
7.193  
7.181  
7.177  
7.164  
7.160  
7.157  
6.965  
6.959  
6.956  
6.952  
6.944  
6.939  
6.935  
6.462  
6.448  
6.446  
6.443  
6.431  
6.426  
6.422  
4.453  
4.224  
4.206  
4.188  
4.171  
3.937

1.196  
1.178  
1.160

—0.000

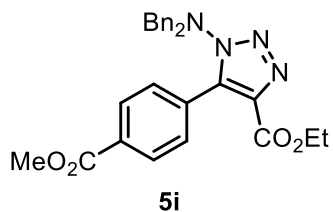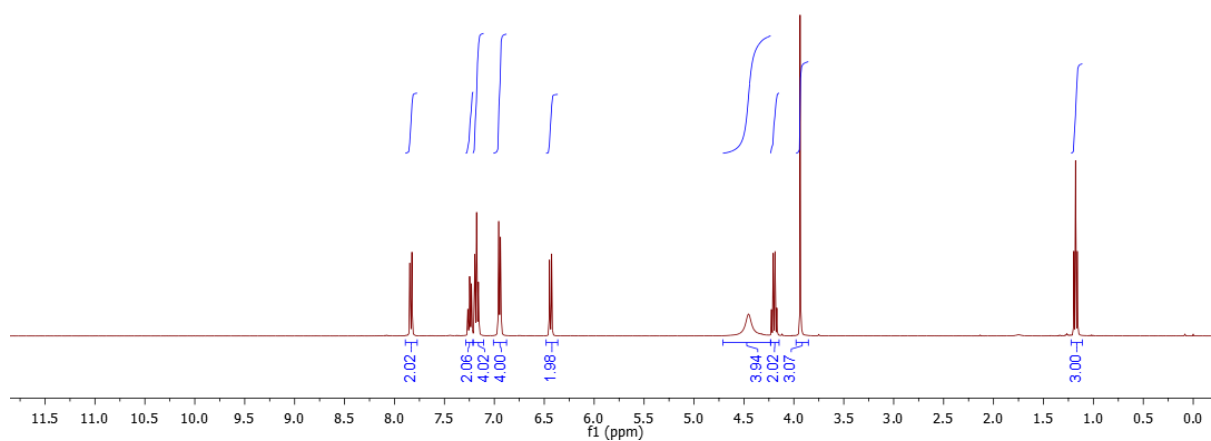

# <sup>13</sup>C NMR (75 MHz, CDCl<sub>3</sub>)

166.580  
160.606

140.821  
134.764  
134.635  
130.676  
130.128  
129.729  
129.690  
128.659  
128.336  
128.296

77.583  
77.158  
76.733

62.565  
61.093

52.318

13.985

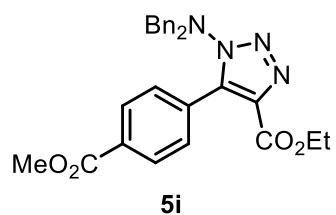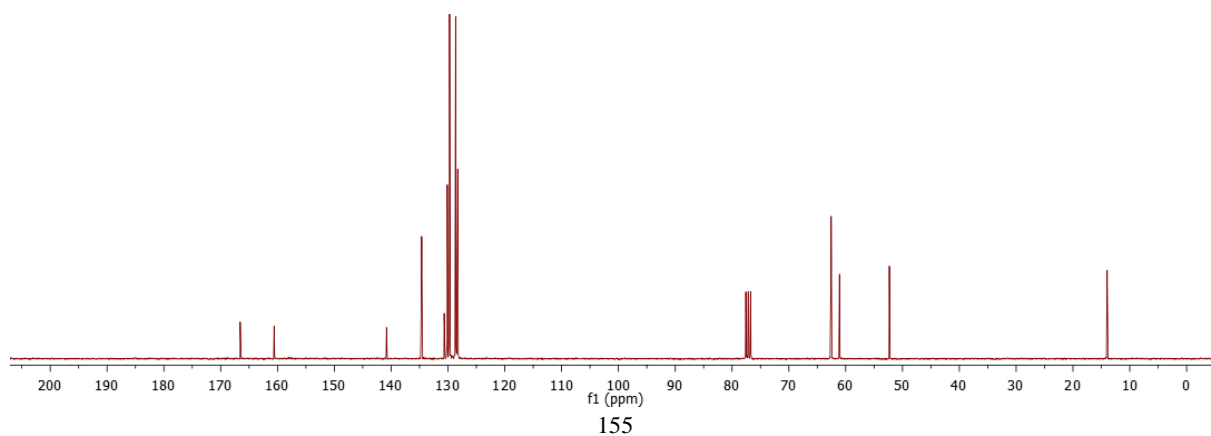



# <sup>1</sup>H NMR (400 MHz, CDCl<sub>3</sub>, 50 °C)

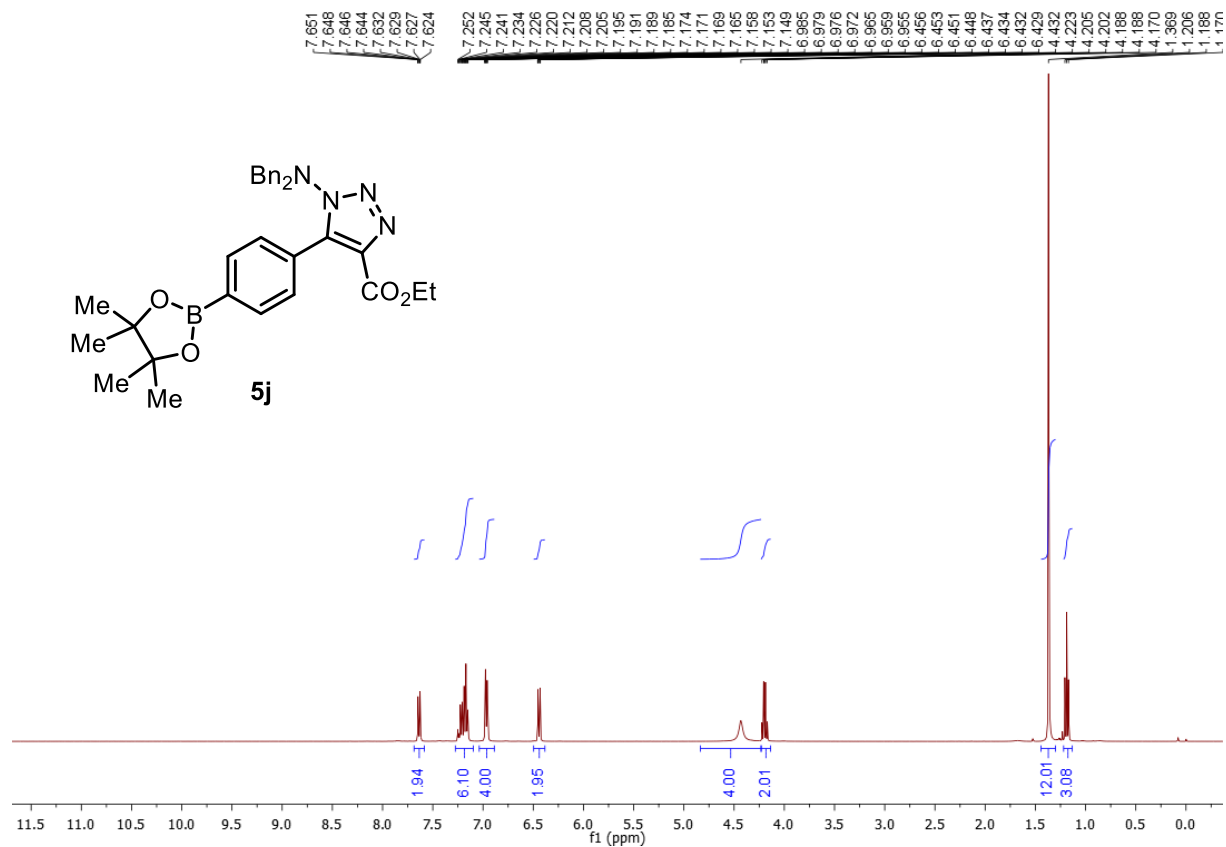

# <sup>13</sup>C NMR (75 MHz, CDCl<sub>3</sub>)

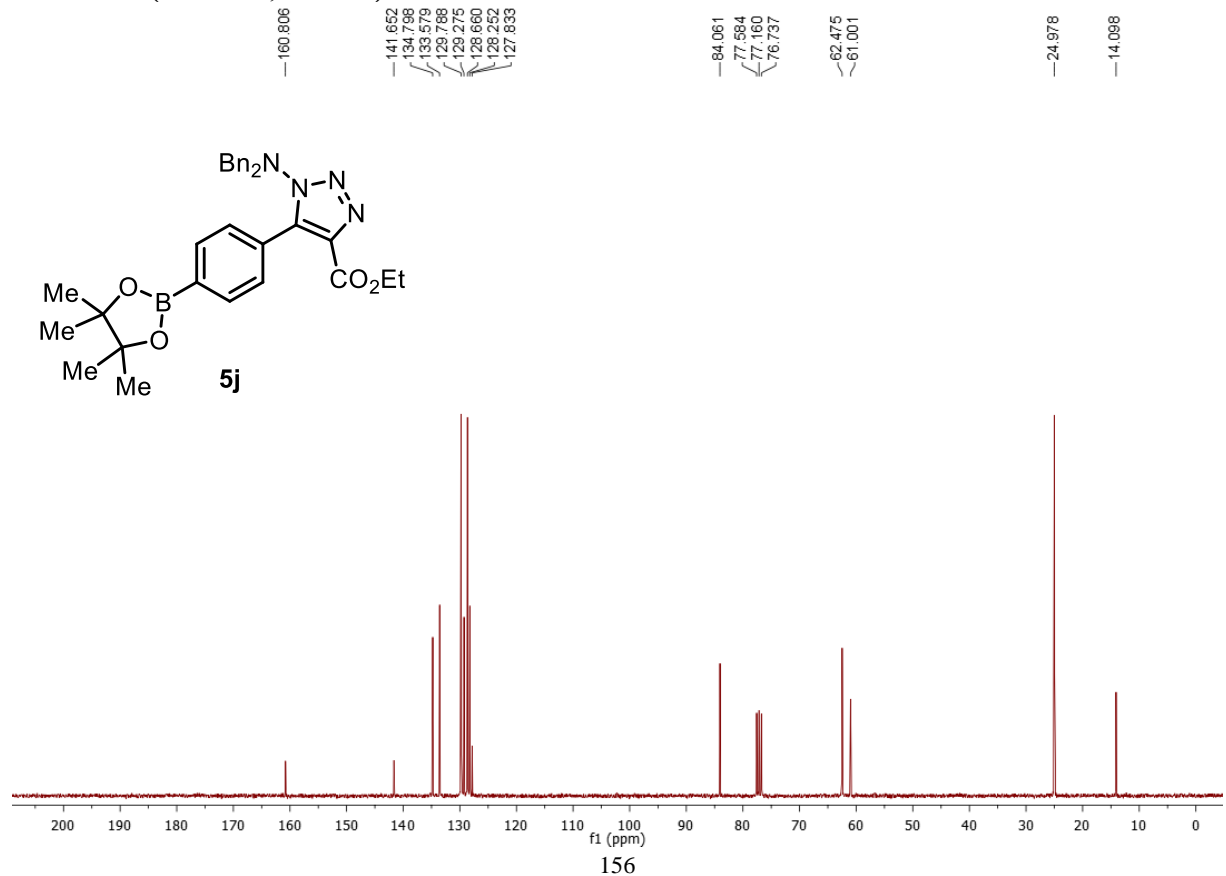

# <sup>1</sup>H NMR (400 MHz, CDCl<sub>3</sub>, 50 °C)

7.265, 7.252, 7.246, 7.241, 7.232, 7.229, 7.225, 7.209, 7.203, 7.199, 7.188, 7.184, 7.180, 7.171, 7.167, 7.163, 7.141, 7.126, 7.121, 7.029, 7.027, 7.023, 7.020, 6.981, 6.975, 6.972, 6.968, 6.966, 6.956, 6.950, 6.217, 6.213, 6.201, 6.197, 6.194, 6.041, 6.038, 6.035, 6.031, 6.018, 6.014, 6.011, 6.007, 4.449, 4.234, 4.216, 4.198, 4.180

-1.664, 1.208, 1.190, 1.172

-0.000

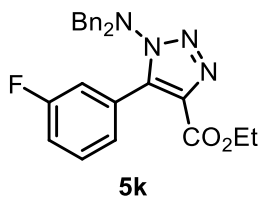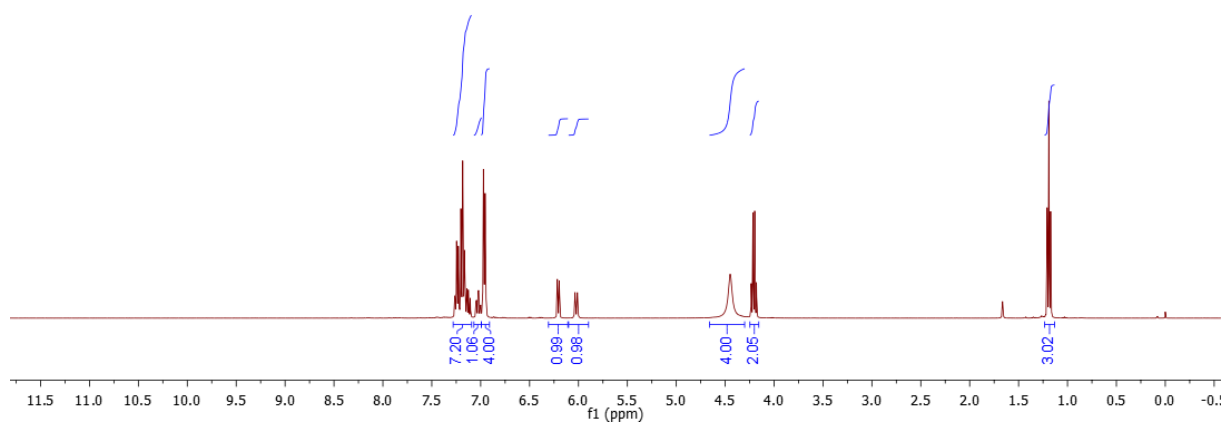

# <sup>13</sup>C NMR (75 MHz, CDCl<sub>3</sub>)

163.187, 160.684, 159.930, 140.537, 140.504, 134.732, 134.702, 129.803, 128.795, 128.674, 128.381, 127.040, 126.919, 125.864, 125.821, 117.470, 117.159, 116.418, 116.141

77.584, 77.159, 76.756

62.573, 61.120

14.004

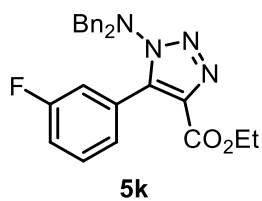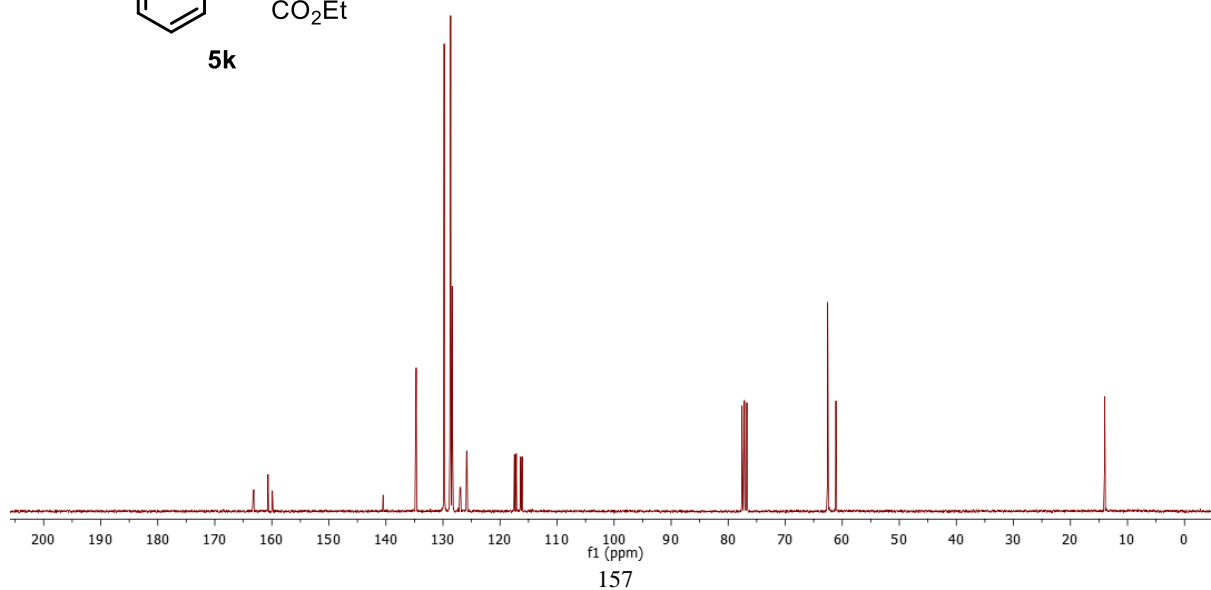

# <sup>1</sup>H NMR (400 MHz, CDCl<sub>3</sub>, 50 °C)

7.308, 7.306, 7.303, 7.290, 7.288, 7.285, 7.282, 7.280, 7.250, 7.245, 7.236, 7.233, 7.229, 7.205, 7.202, 7.191, 7.186, 7.174, 7.169, 7.166, 7.106, 7.088, 7.087, 7.067, 6.972, 6.969, 6.965, 6.957, 6.952, 6.948, 6.290, 6.286, 6.283, 6.267, 6.264, 6.260, 4.448, 4.224, 4.206, 4.189, 4.188, 4.171, 1.199, 1.198, 1.182, 1.180, 1.164, 1.162, -0.000

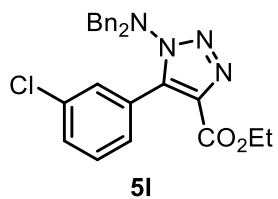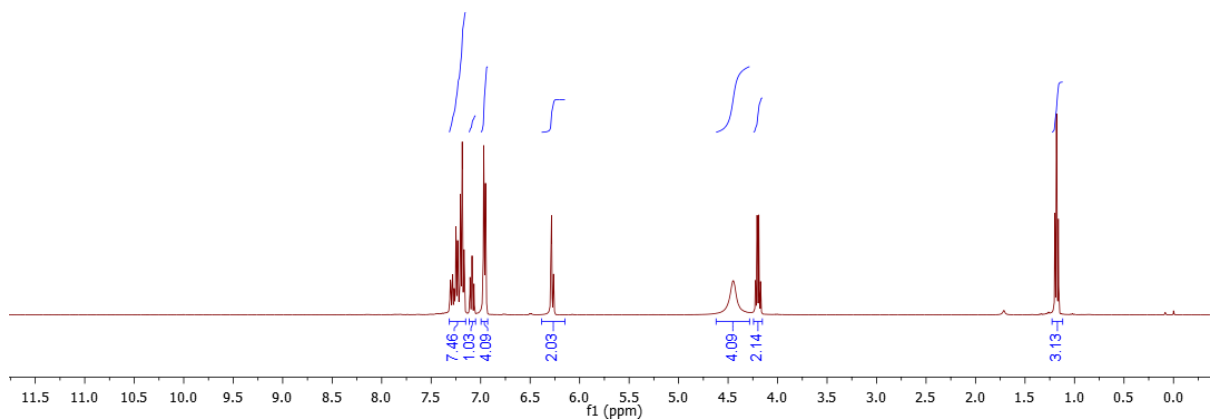

# <sup>13</sup>C NMR (75 MHz, CDCl<sub>3</sub>)

160.630, 140.451, 134.696, 134.611, 133.105, 130.076, 129.800, 129.391, 128.697, 128.420, 128.379, 128.228, 126.727, 77.478, 77.160, 76.842, 62.609, 61.107, 13.985

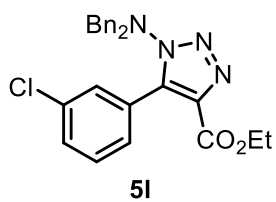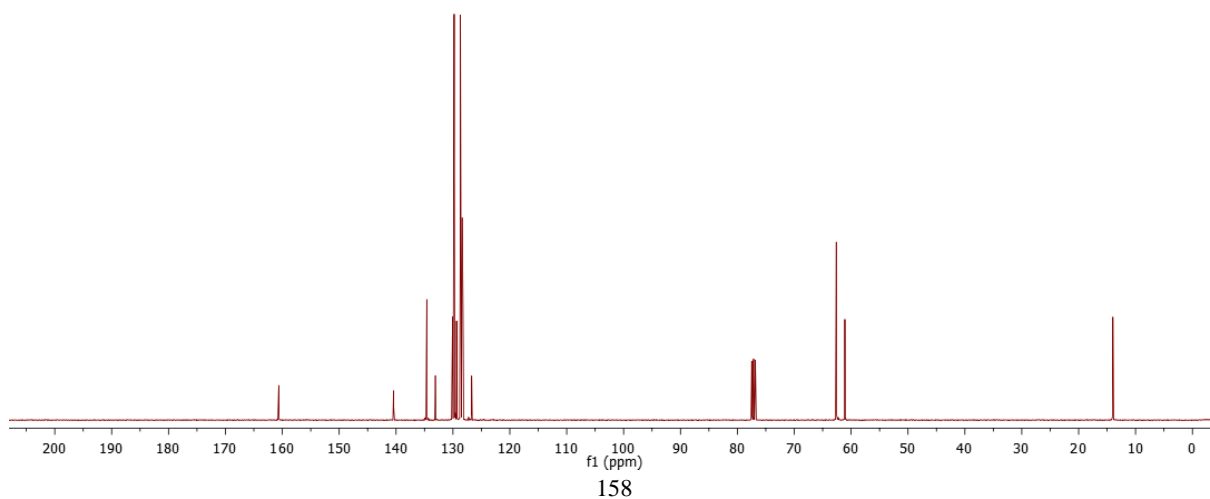

# <sup>1</sup>H NMR (400 MHz, CDCl<sub>3</sub>, 50 °C)

7.945, 7.941, 7.937, 7.925, 7.921, 7.918, 7.902, 7.883, 7.863, 7.844, 7.840, 7.832, 7.825, 7.225, 7.219, 7.211, 7.207, 7.204, 7.200, 7.196, 7.193, 7.191, 7.181, 7.177, 7.172, 7.161, 7.156, 7.143, 7.139, 7.136, 7.134, 6.980, 6.975, 6.972, 6.968, 6.960, 6.955, 6.951, 6.625, 6.621, 6.618, 6.606, 6.602, 6.599, 4.463, 4.240, 4.222, 4.204, 4.186, -2.485

1.209, 1.191, 1.173

-0.000

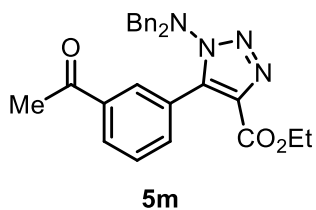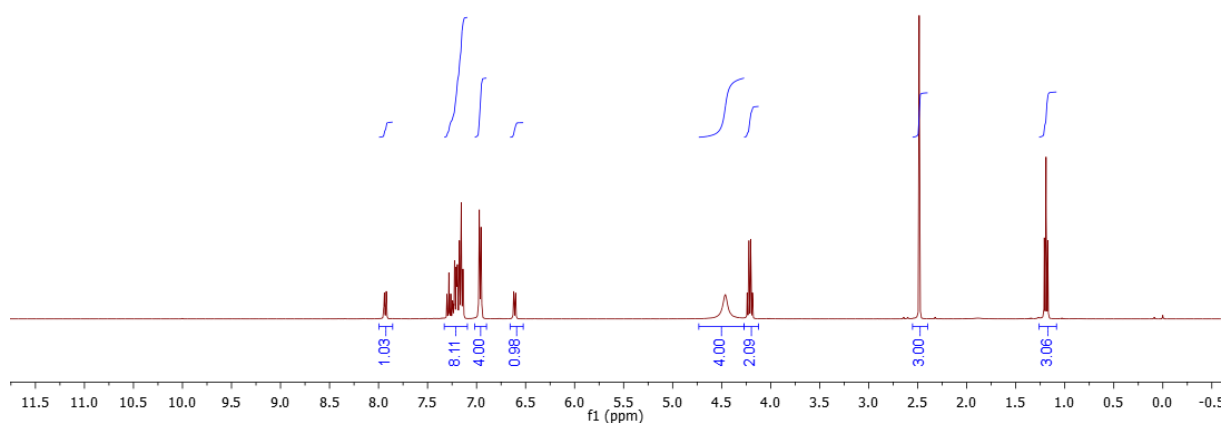

# <sup>13</sup>C NMR (75 MHz, CDCl<sub>3</sub>)

197.111, 160.710, 140.719, 136.271, 134.704, 134.657, 134.594, 130.275, 129.713, 129.028, 128.618, 128.285, 127.590, 125.599, 77.478, 77.159, 76.842, 62.512, 61.117, 26.713, 14.019

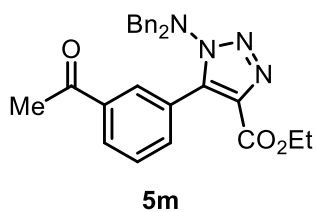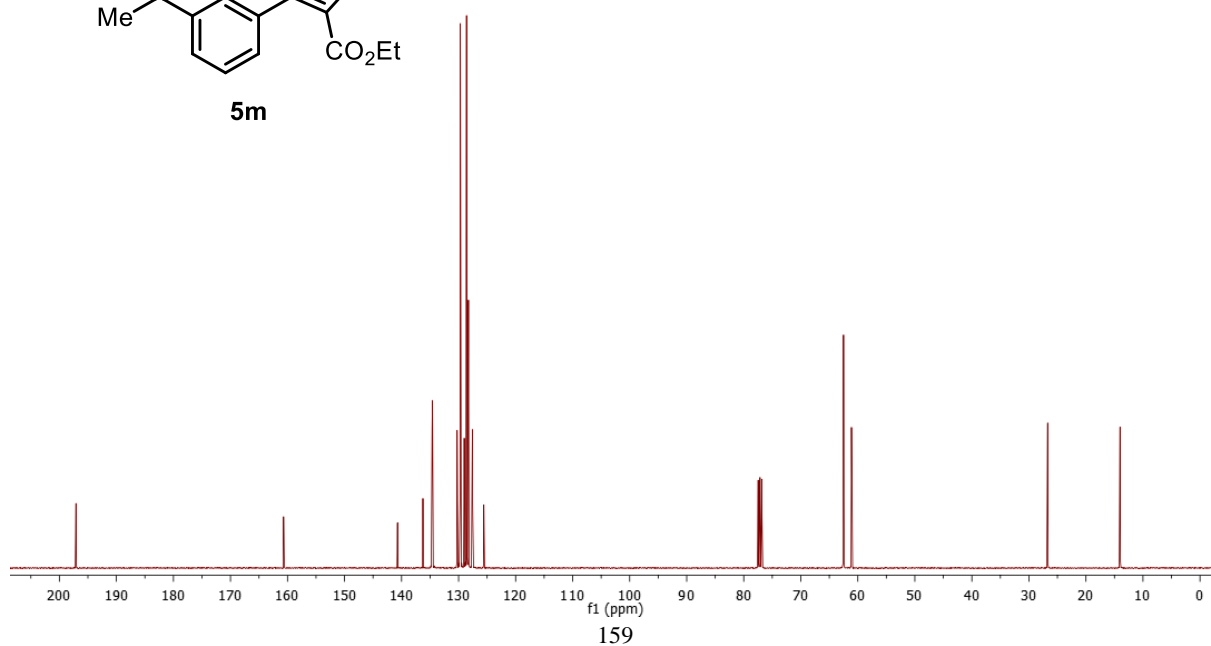

# <sup>1</sup>H NMR (400 MHz, CDCl<sub>3</sub>, 50 °C)

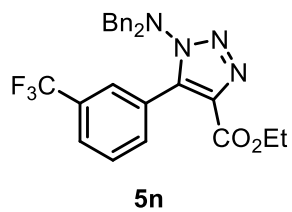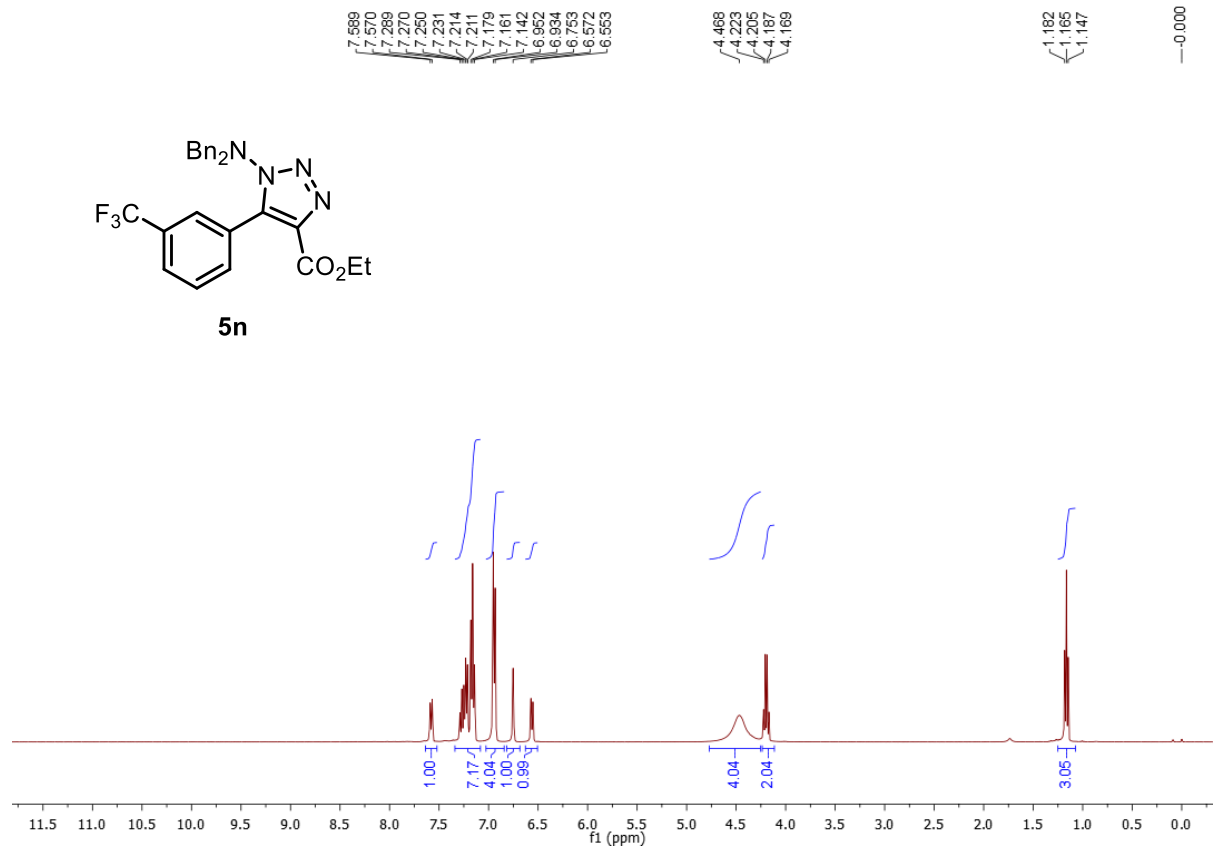

# <sup>13</sup>C NMR (75 MHz, CDCl<sub>3</sub>)

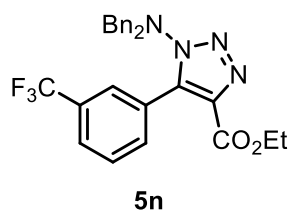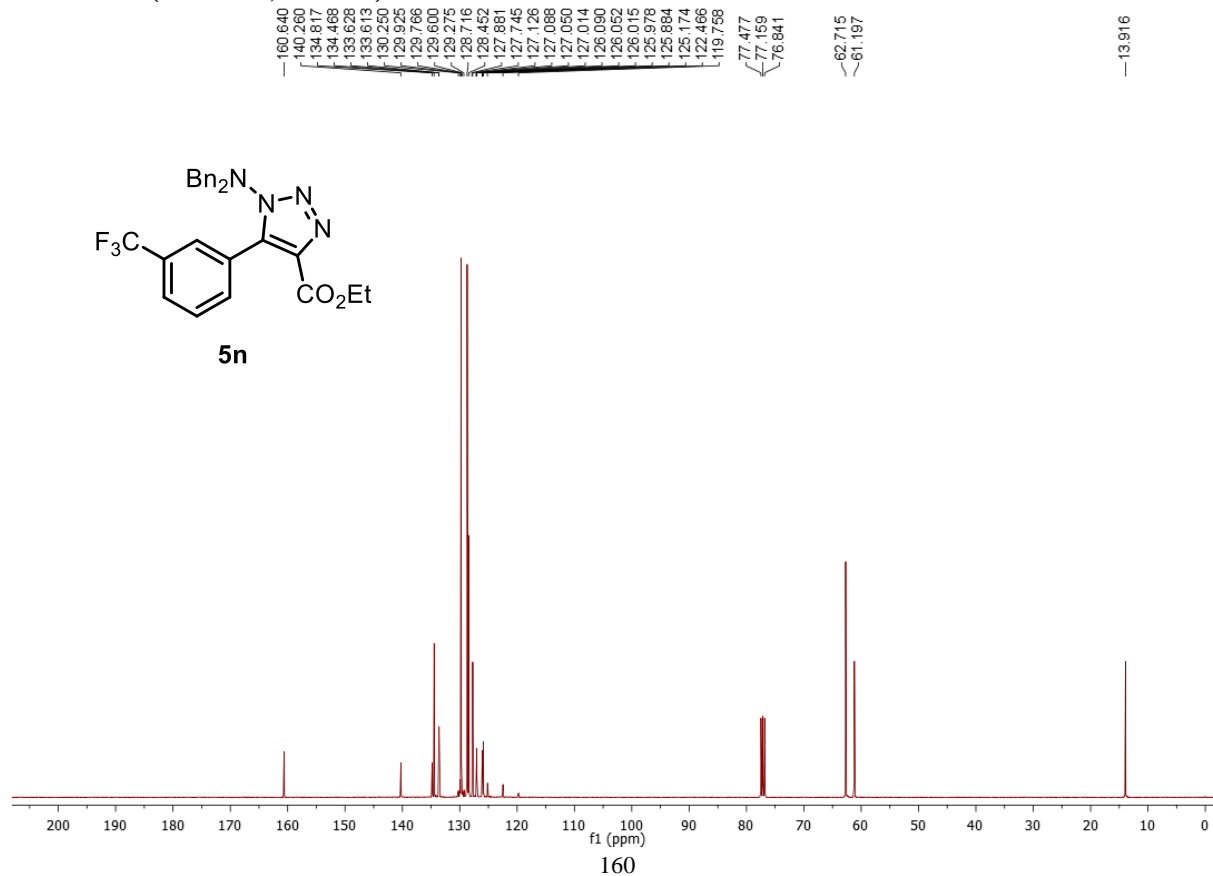

# <sup>1</sup>H NMR (400 MHz, CDCl<sub>3</sub>, 50 °C)

7.430, 7.427, 7.410, 7.407, 7.379, 7.375, 7.360, 7.356, 7.340, 7.336, 7.266, 7.263, 7.257, 7.248, 7.241, 7.235, 7.231, 7.227, 7.220, 7.207, 7.202, 7.189, 7.185, 7.180, 7.081, 7.078, 7.062, 7.059, 7.043, 6.990, 5.944, 5.928, 5.924, 4.506, 4.475, 4.475, 4.534, 4.505, 4.501, 4.428, 4.217, 4.211, 4.199, 4.193, 4.182, 4.175, 4.164

-1.722

1.155, 1.138, 1.120

-0.000

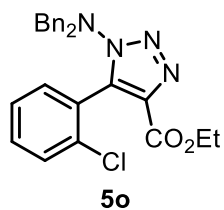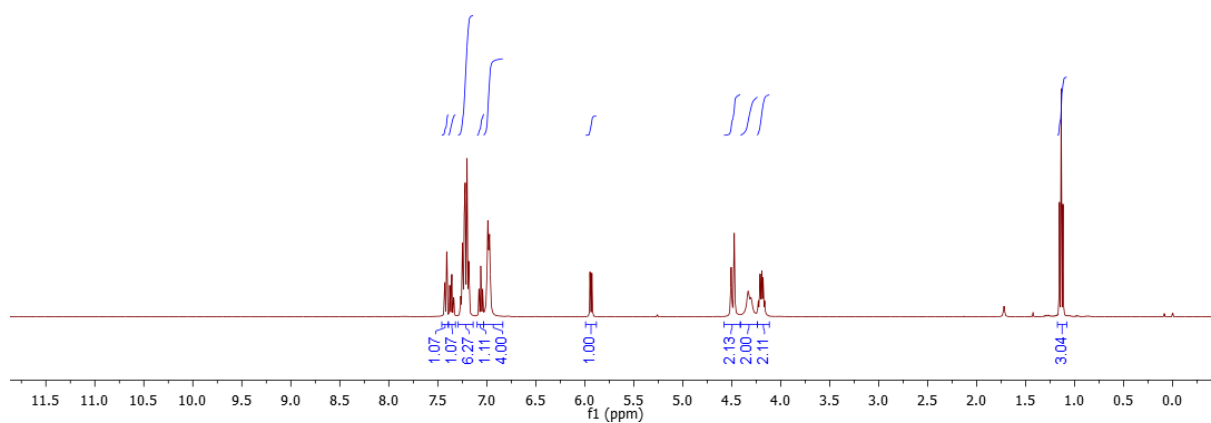

# <sup>13</sup>C NMR (75 MHz, CDCl<sub>3</sub>)

160.543, 136.605, 136.805, 136.369, 133.812, 132.025, 130.911, 129.516, 128.825, 128.651, 128.177, 126.051, 125.543, 77.586, 77.162, 76.757, 61.489, 61.005, 13.931

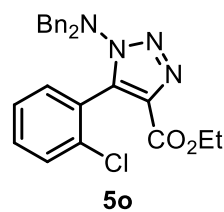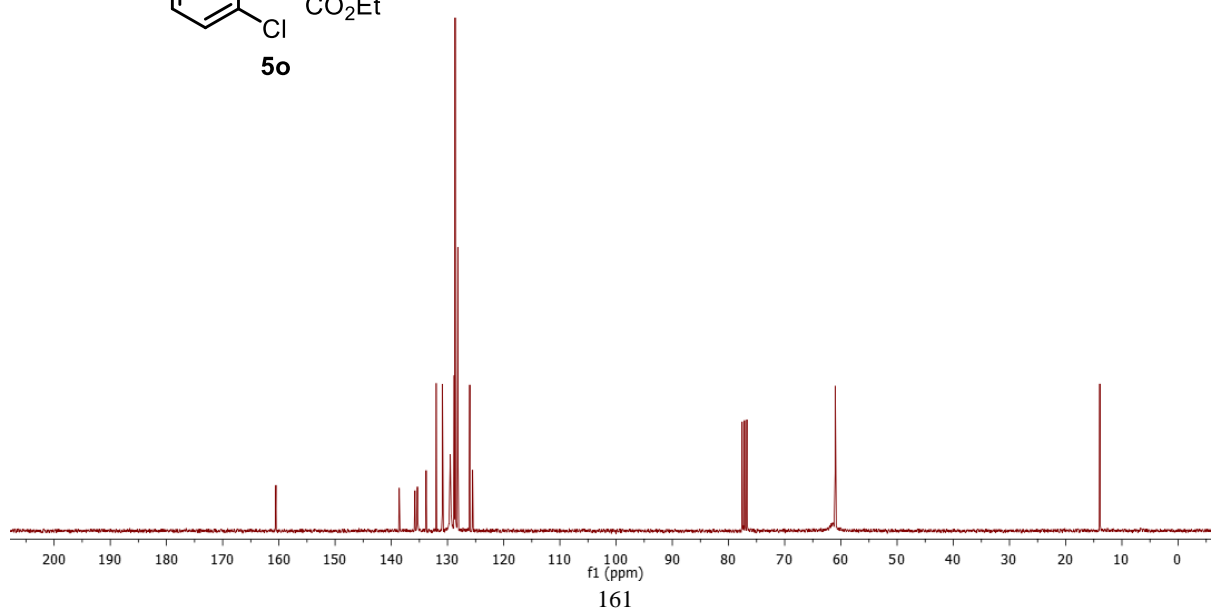

# <sup>1</sup>H NMR (400 MHz, CDCl<sub>3</sub>, 50 °C)

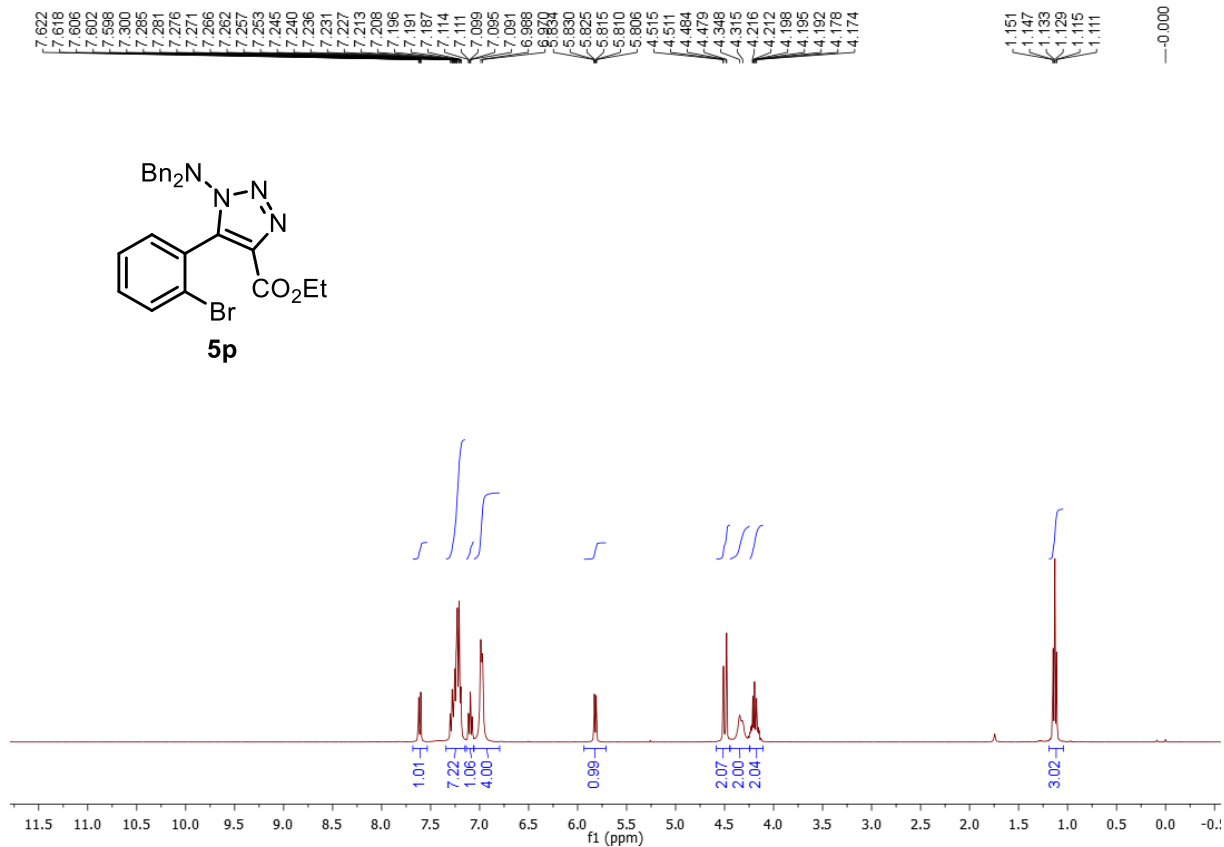

# <sup>13</sup>C NMR (75 MHz, CDCl<sub>3</sub>)

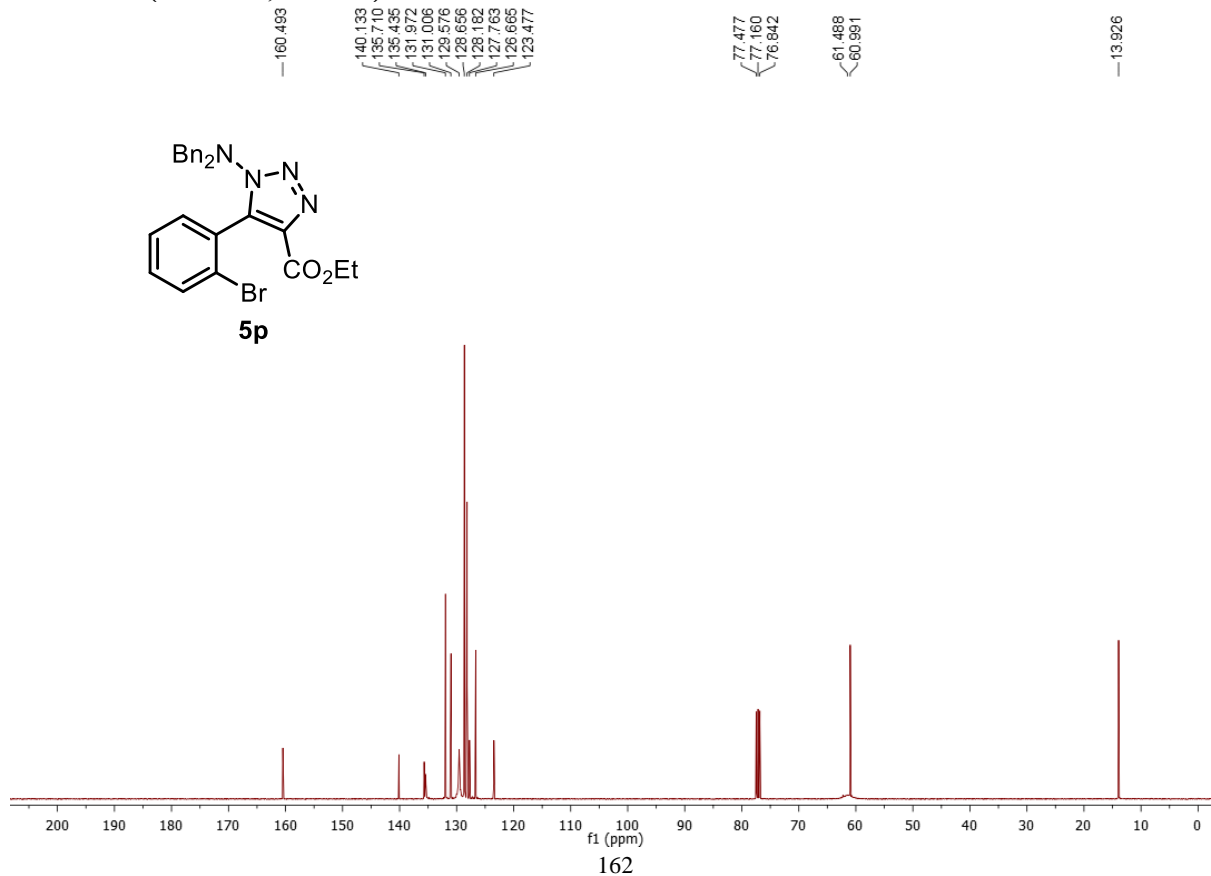

# <sup>1</sup>H NMR (400 MHz, CDCl<sub>3</sub>, 50 °C)

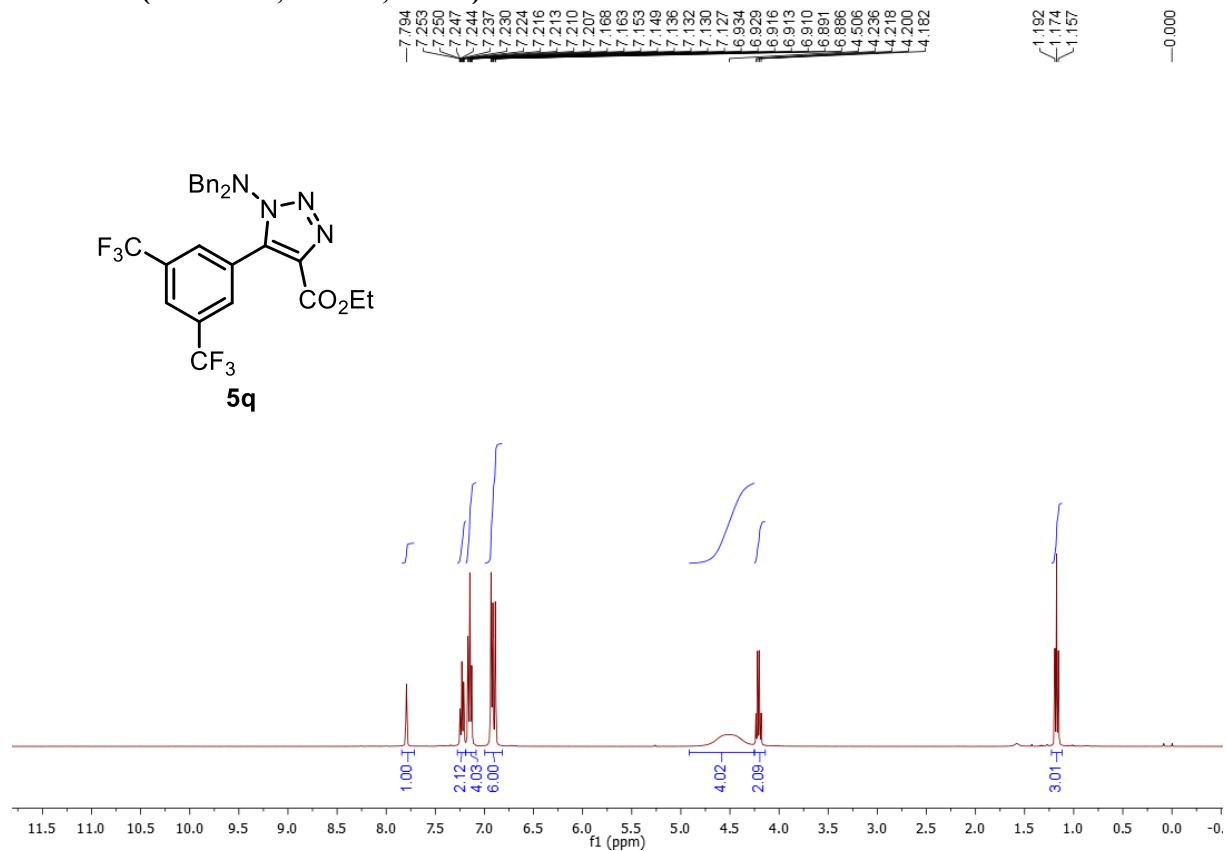

# <sup>13</sup>C NMR (75 MHz, CDCl<sub>3</sub>)

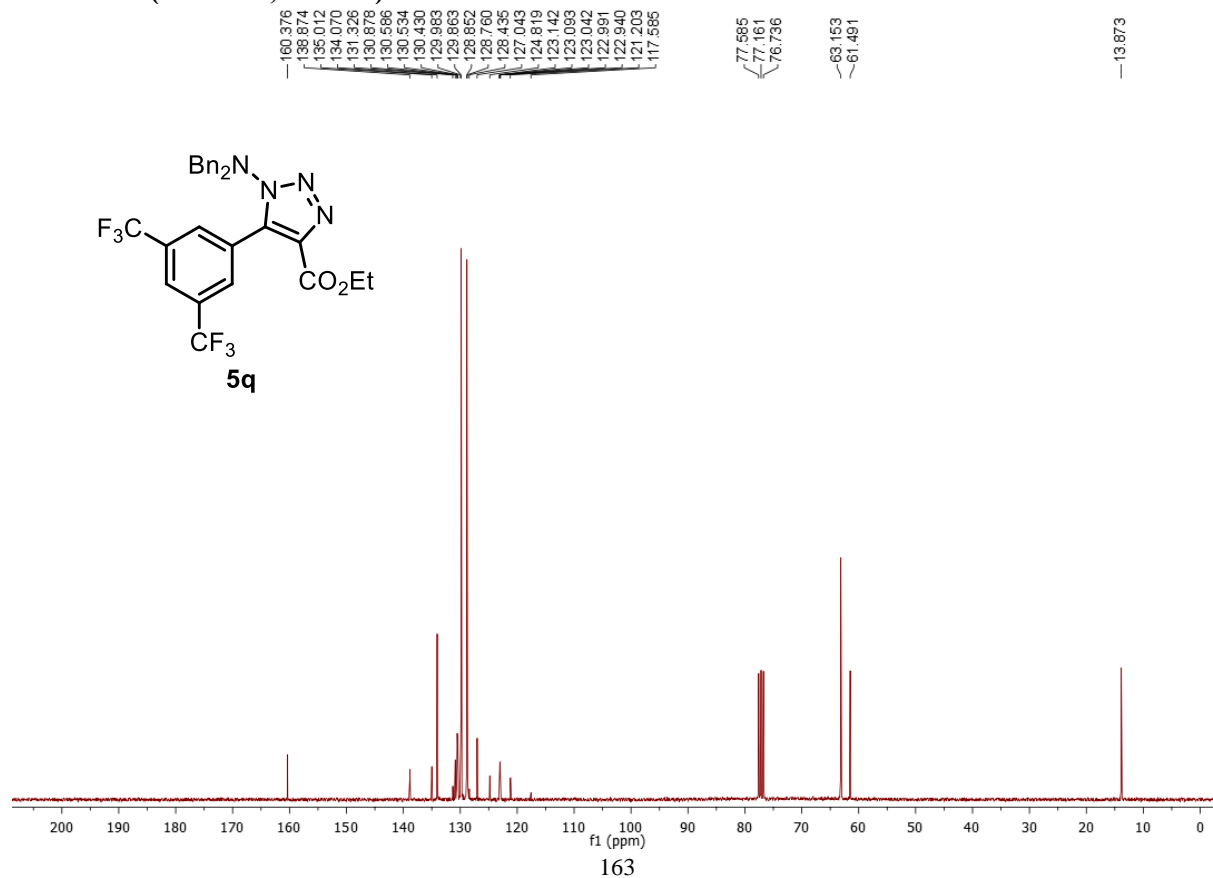



# <sup>1</sup>H NMR (400 MHz, CDCl<sub>3</sub>, 50 °C)

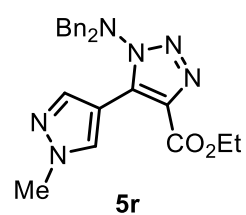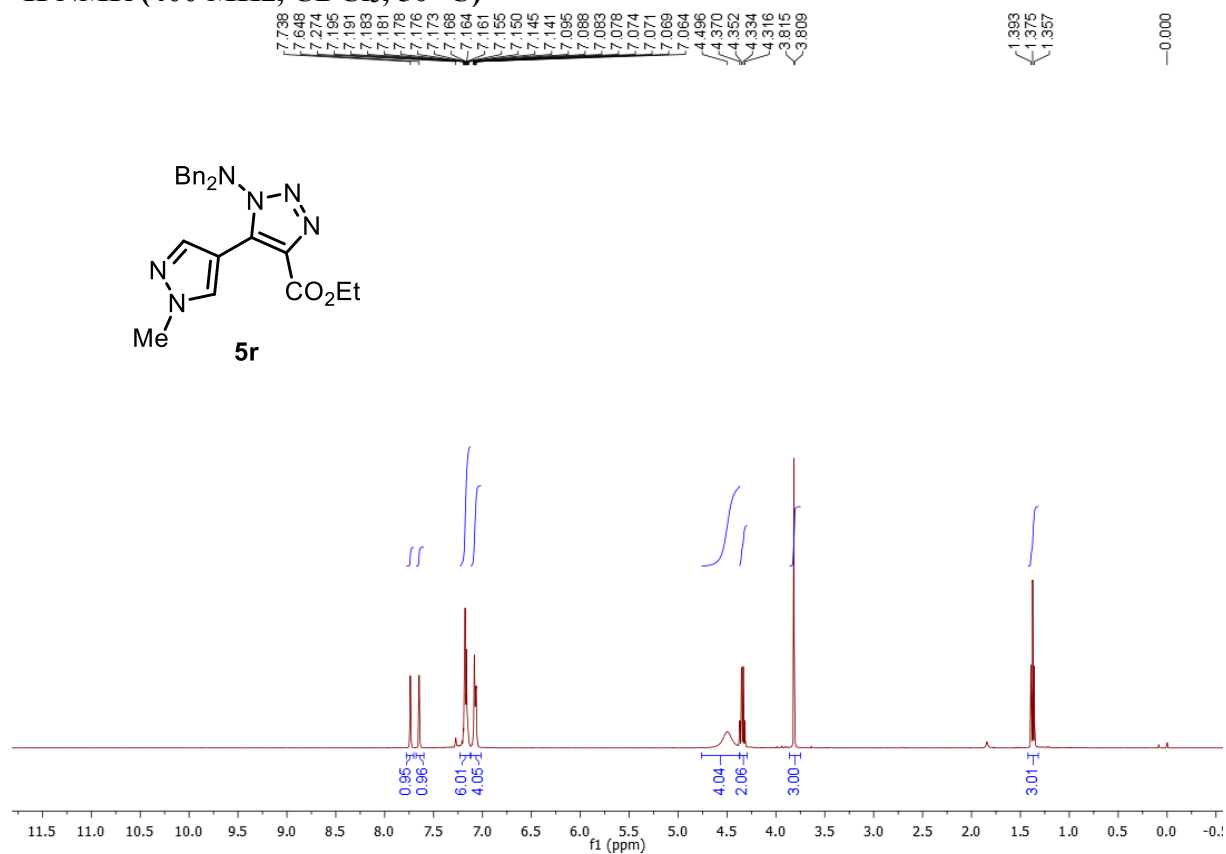

# <sup>13</sup>C NMR (75 MHz, CDCl<sub>3</sub>)

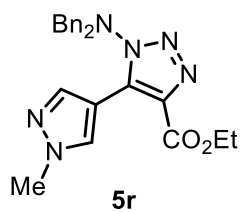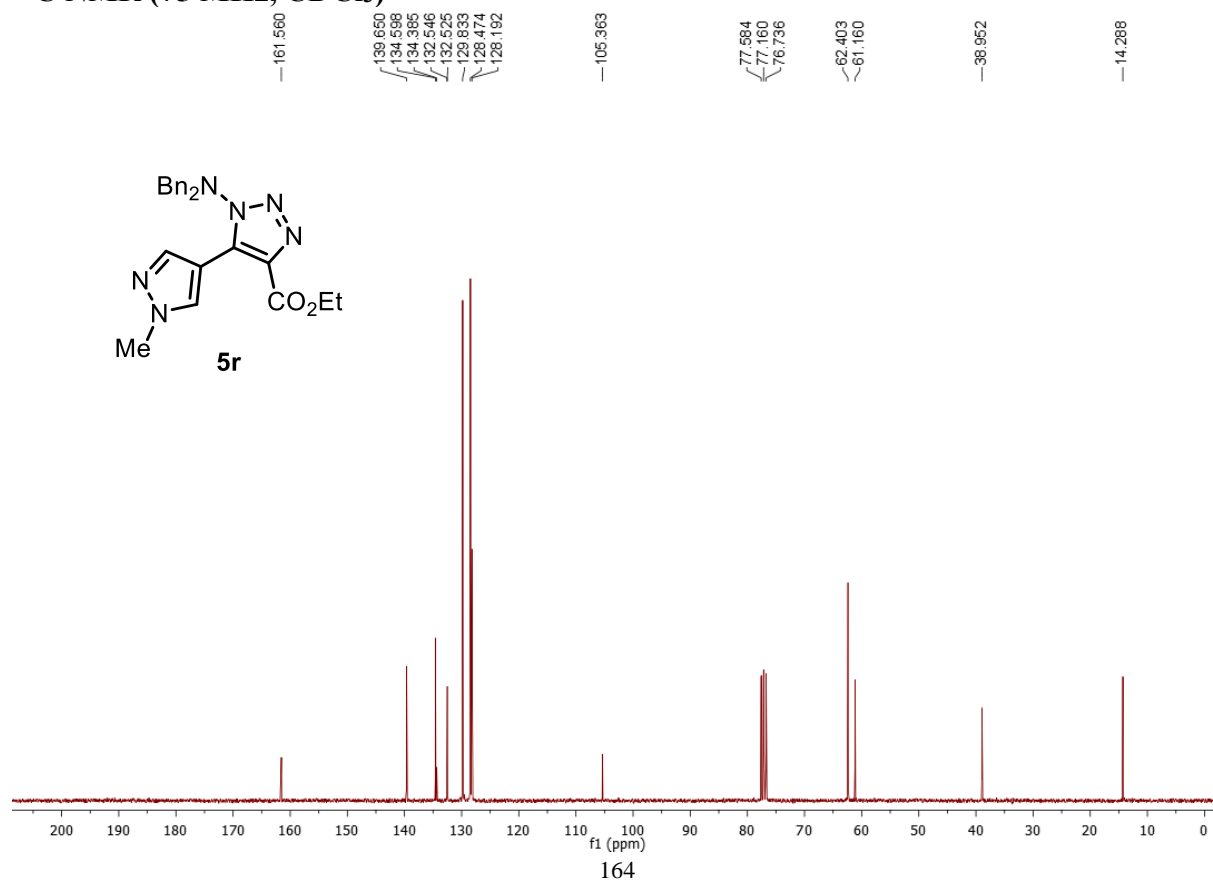

# <sup>1</sup>H NMR (300 MHz, CDCl<sub>3</sub>)

7.316  
7.311  
7.306  
7.301  
7.288  
7.278  
7.270  
7.265  
7.257  
7.239  
7.233  
7.216  
7.211  
7.203  
7.050  
7.045  
7.025  
7.018  
4.407  
4.348  
4.324  
4.300  
4.277  
-1.678  
-1.314  
-1.290  
-1.267  
-0.000

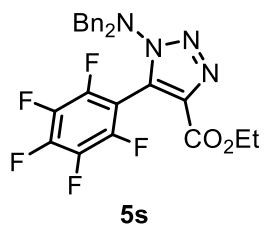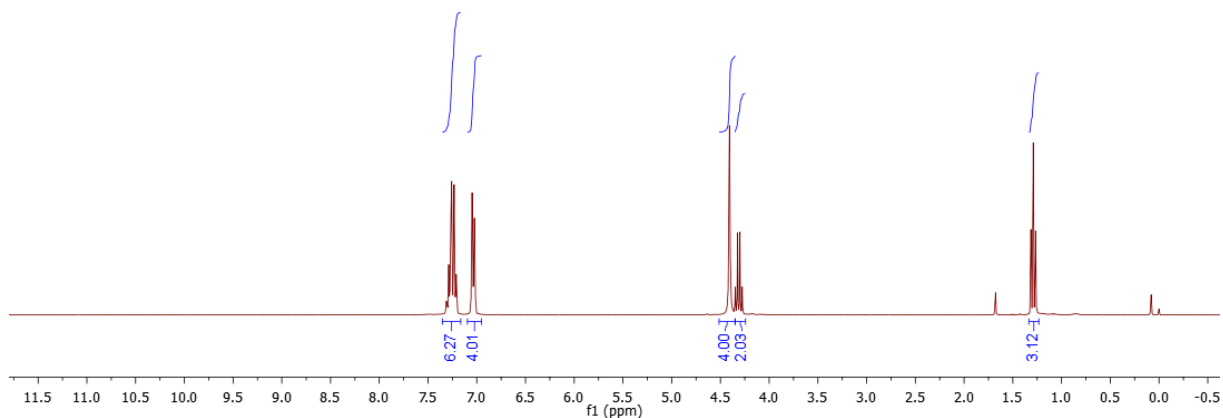

# <sup>13</sup>C NMR (100 MHz, CDCl<sub>3</sub>)

159.904  
145.791  
145.747  
145.682  
145.627  
145.573  
143.962  
143.933  
143.884  
143.851  
143.801  
143.750  
143.719  
143.669  
143.619  
143.274  
143.232  
143.182  
143.115  
143.057  
141.418  
141.372  
141.319  
141.286  
141.236  
141.188  
141.159  
141.107  
141.059  
138.800  
138.660  
138.608  
138.533  
138.478  
136.758  
136.325  
136.307  
136.257  
136.184  
136.134  
136.046  
135.962  
134.842  
129.206  
128.818  
128.535  
127.326  
127.304  
127.283  
127.247  
102.206  
102.075  
102.035  
101.904  
101.864  
77.477  
77.160  
76.942  
61.703  
61.676  
14.095

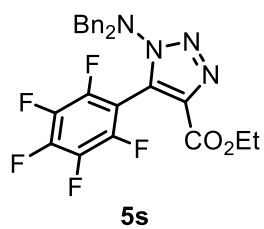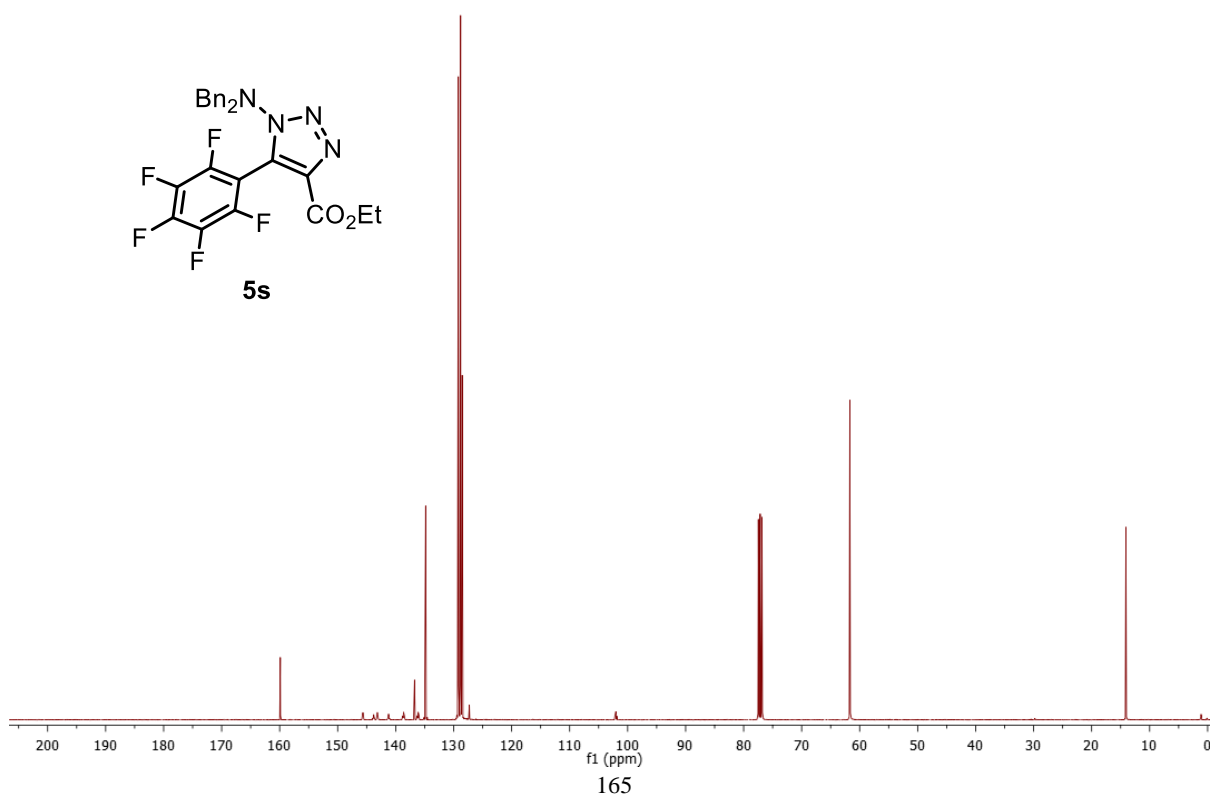

# <sup>1</sup>H NMR (400 MHz, CDCl<sub>3</sub>, 50 °C)

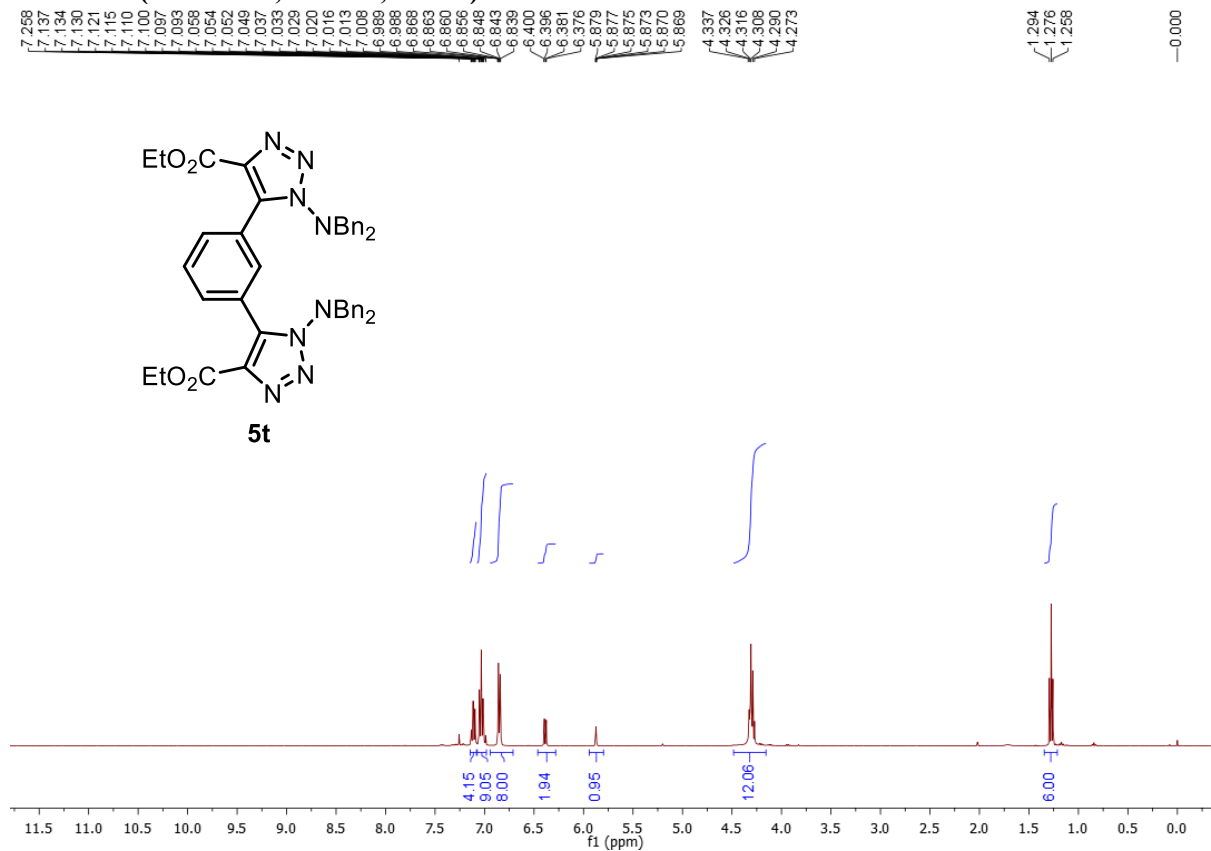

# <sup>13</sup>C NMR (75 MHz, CDCl<sub>3</sub>)

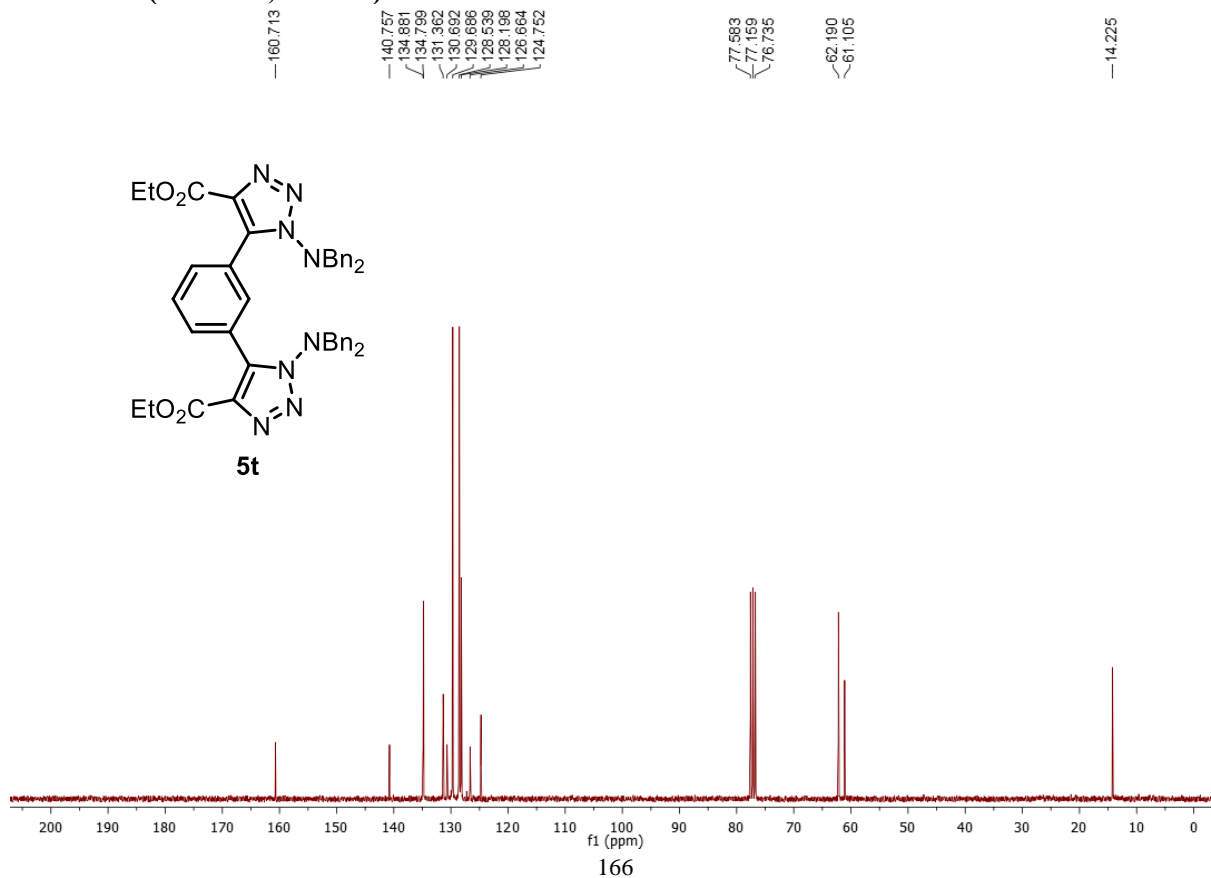

# <sup>1</sup>H NMR (300 MHz, CDCl<sub>3</sub>)

7.305  
7.300  
7.291  
7.280  
7.272  
7.262  
7.256  
7.252  
7.234  
7.229  
7.215  
7.209  
7.193  
7.186  
7.181  
7.177  
7.168  
7.162  
7.147  
7.140  
7.132  
6.977  
6.968  
6.964  
6.959  
6.949  
6.942  
6.936  
6.191  
6.182  
6.176  
6.161  
6.154  
6.145

-4.464

-1.602

-0.000

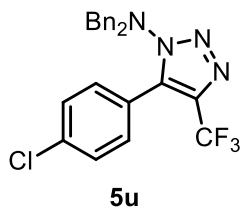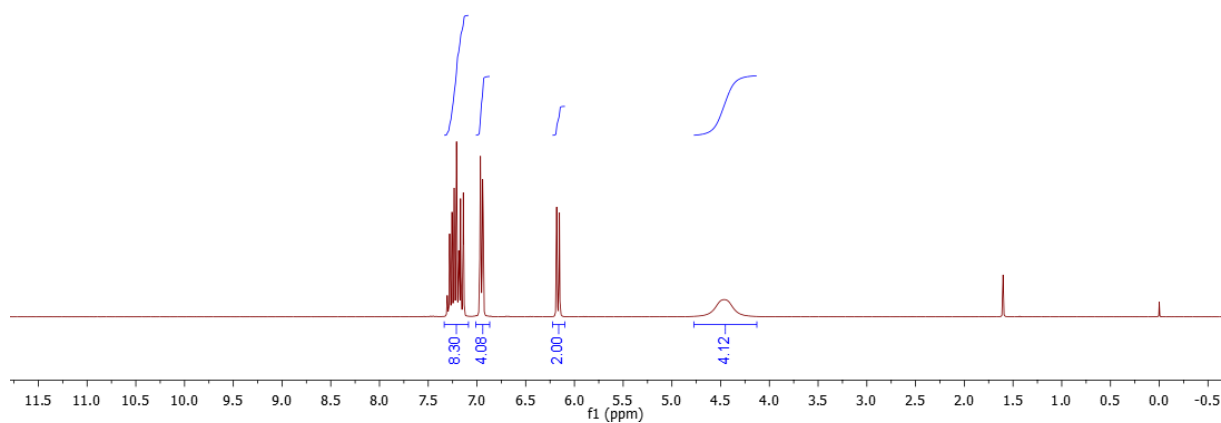

# <sup>13</sup>C NMR (75 MHz, CDCl<sub>3</sub>)

137.172  
137.146  
136.161  
134.689  
134.343  
133.961  
133.567  
131.069  
129.795  
128.778  
128.548  
128.091  
124.633  
122.297  
121.977  
119.309  
116.629

77.476  
77.159  
76.841

-62.805

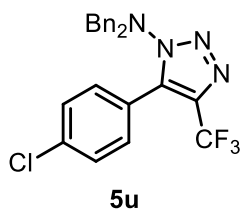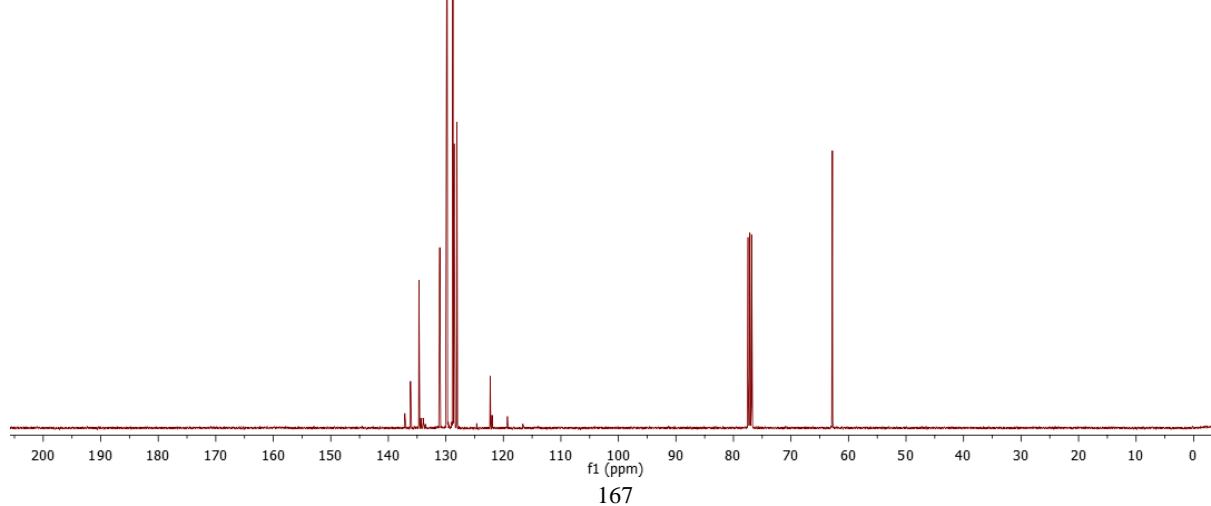

# <sup>1</sup>H NMR (400 MHz, CDCl<sub>3</sub>, 50 °C)

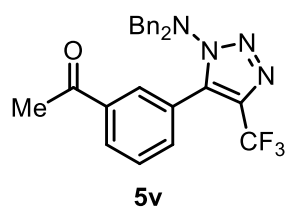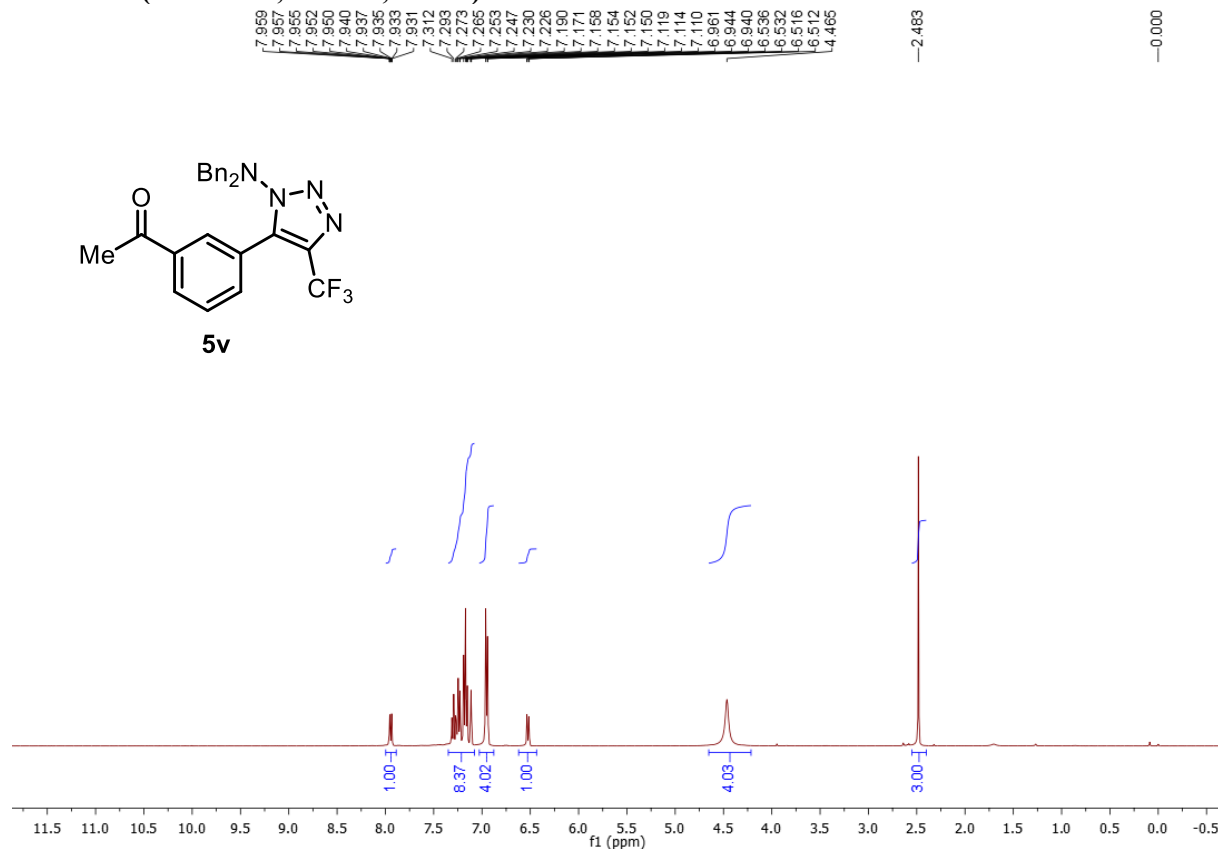

# <sup>13</sup>C NMR (75 MHz, CDCl<sub>3</sub>)

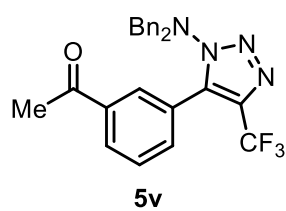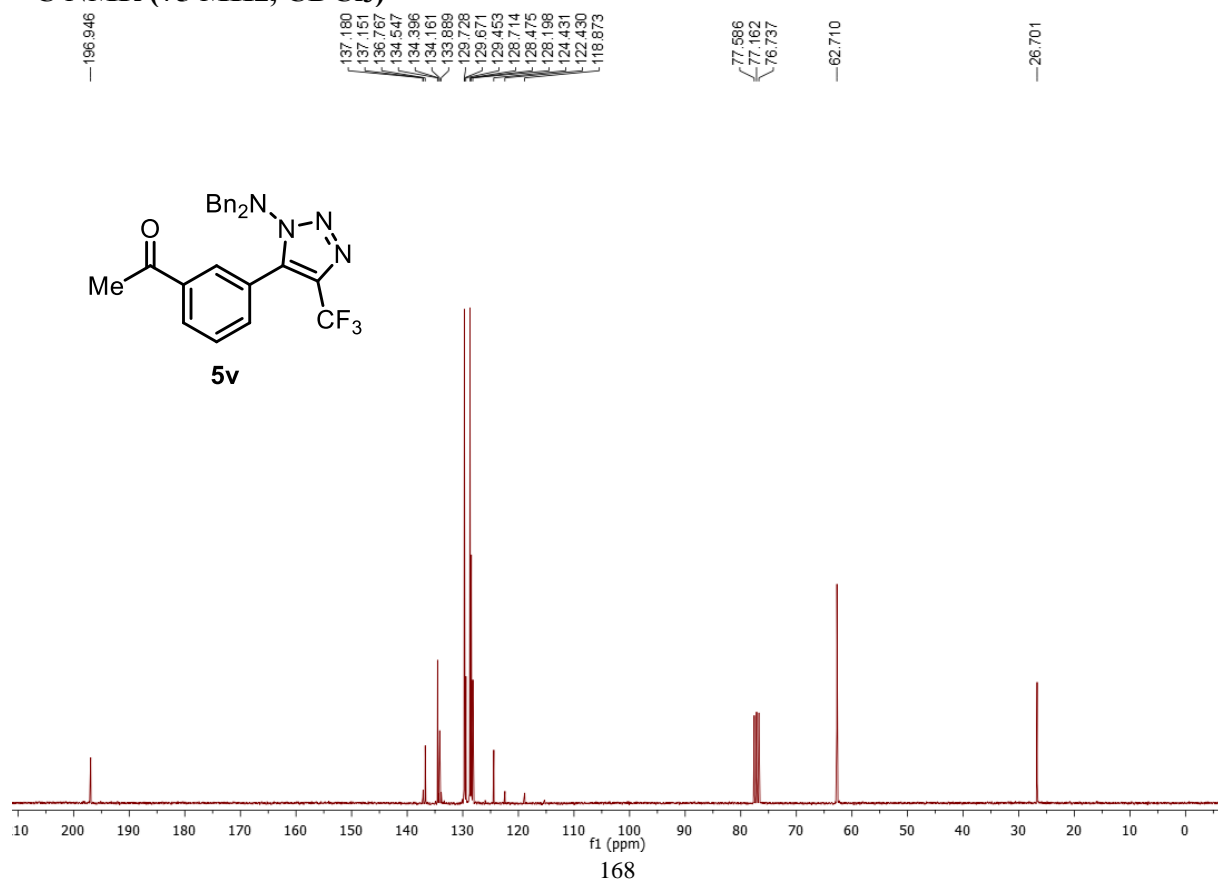

# <sup>1</sup>H NMR (300 MHz, CDCl<sub>3</sub>)

7.516  
7.506  
7.500  
7.490  
7.486  
7.480  
7.474  
7.472  
7.463  
7.275

4.582  
4.569  
4.535  
4.311  
3.788  
3.775  
3.770  
3.757  
3.381  
3.370  
3.362  
3.350

1.333  
1.309  
1.285

-0.000

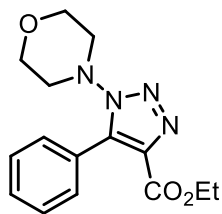

5w

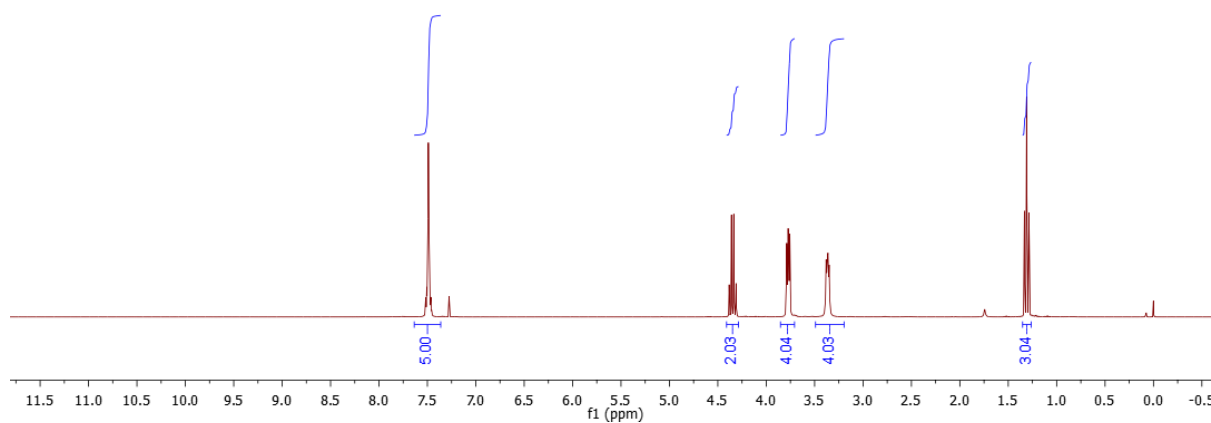

# <sup>13</sup>C NMR (75 MHz, CDCl<sub>3</sub>)

161.110

138.930  
136.097  
130.273  
128.128  
125.069

77.583  
77.160  
76.737  
66.586  
61.249  
55.642

14.243

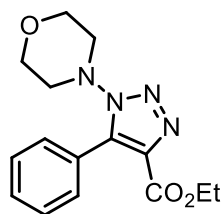

5w

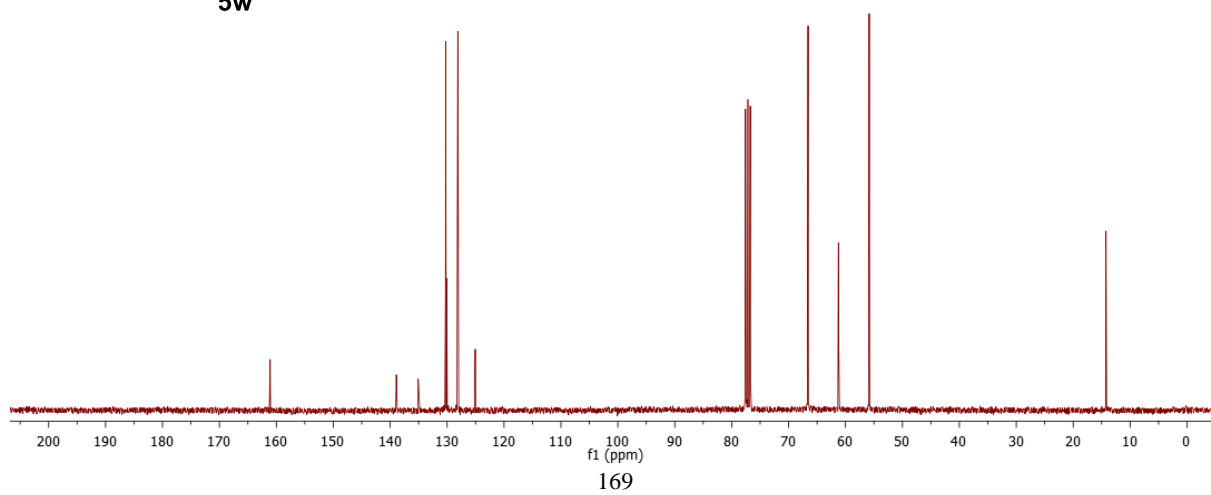

# <sup>1</sup>H NMR (300 MHz, CDCl<sub>3</sub>)

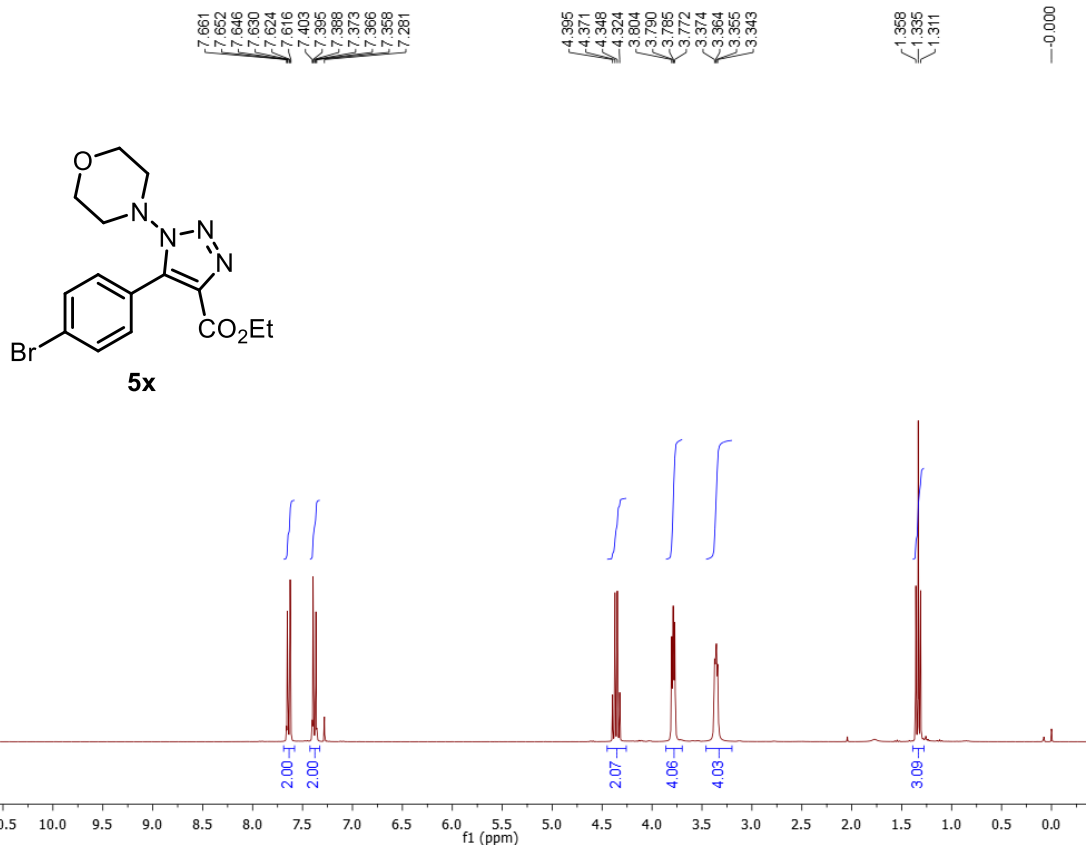

# <sup>13</sup>C NMR (75 MHz, CDCl<sub>3</sub>)

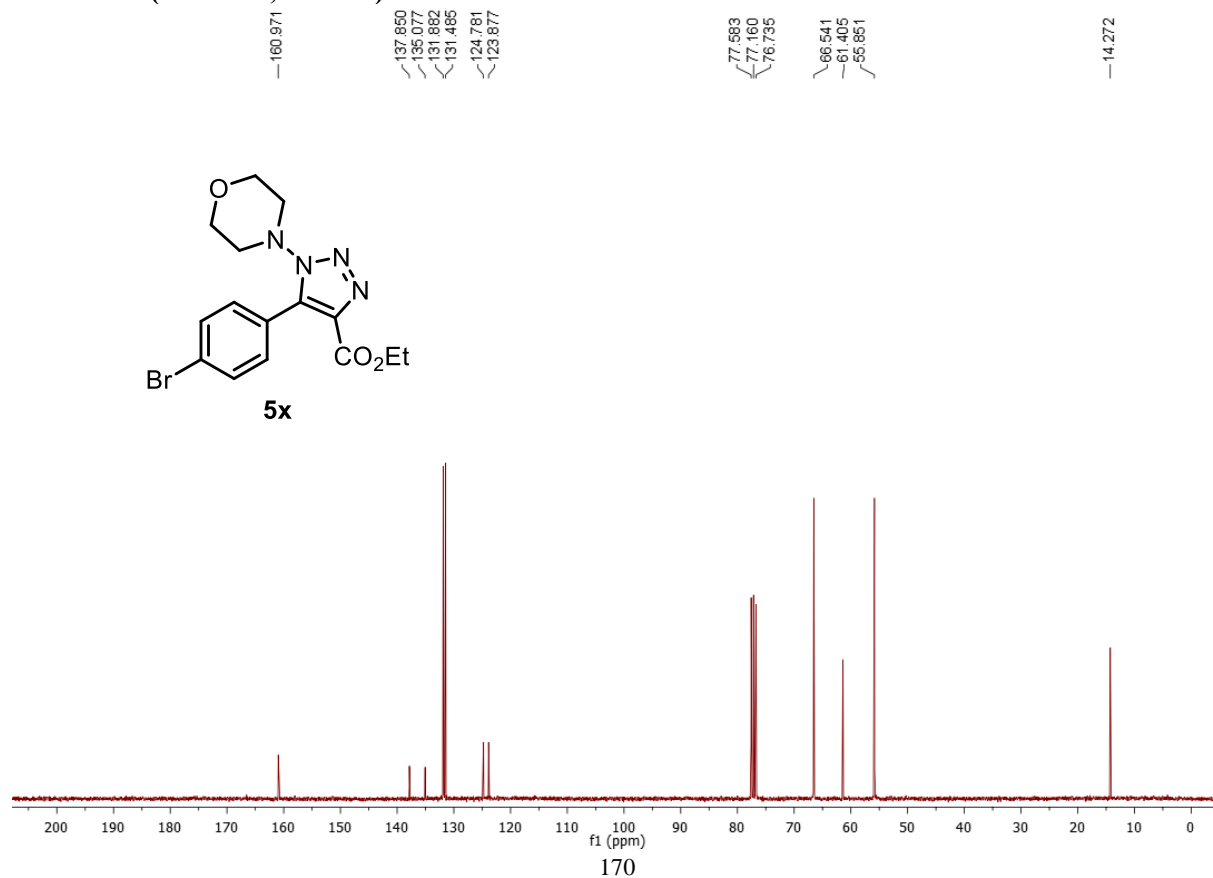

# <sup>1</sup>H NMR (300 MHz, CDCl<sub>3</sub>)

7.736, 7.731, 7.729, 7.710, 7.705, 7.472, 7.467, 7.447, 7.442, 7.423, 7.416, 7.411, 7.396, 7.386, 7.367, 7.361, 7.281, 7.231, 7.224, 7.208, 7.206, 7.200, 4.366, 4.332, 4.320, 4.310, 4.286, 4.287, 4.273, 4.263, 4.249, 4.240, 4.227, 4.204, 3.759, 3.733, 3.717, 3.702, 3.676, 3.670, 3.664, 3.478, 3.463, 3.447, 3.443, 3.427, 3.411, 3.358, 3.343, 3.326, 3.307, 3.291, 1.768, 1.233, 1.210, 1.186, 0.000

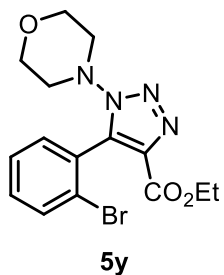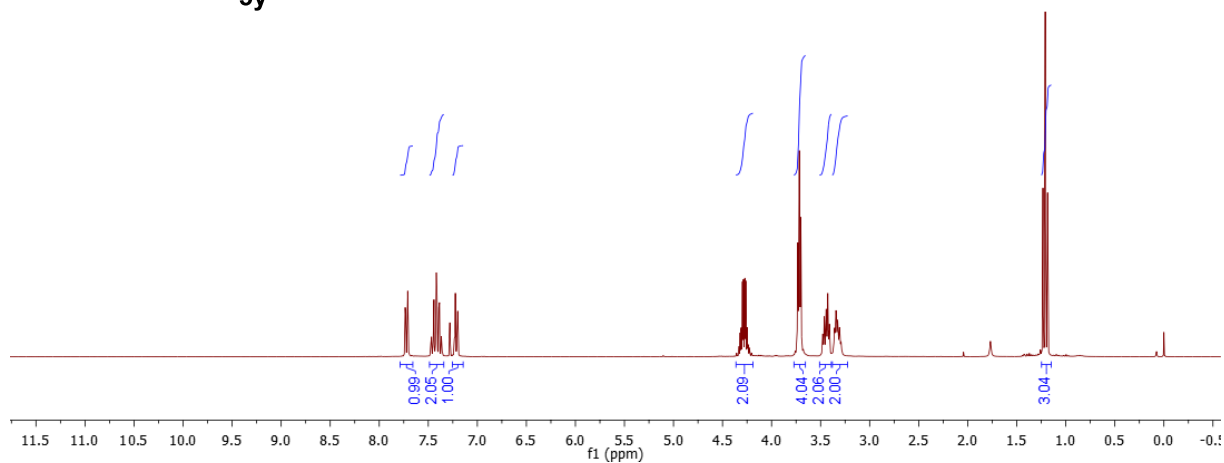

# <sup>13</sup>C NMR (75 MHz, CDCl<sub>3</sub>)

160.505, 138.472, 136.004, 132.854, 131.411, 131.362, 128.082, 127.284, 123.766, 77.583, 77.159, 76.735, 66.558, 61.152, 55.805, 14.058

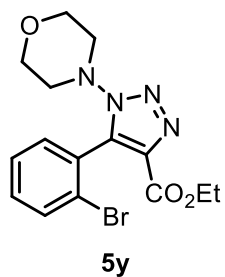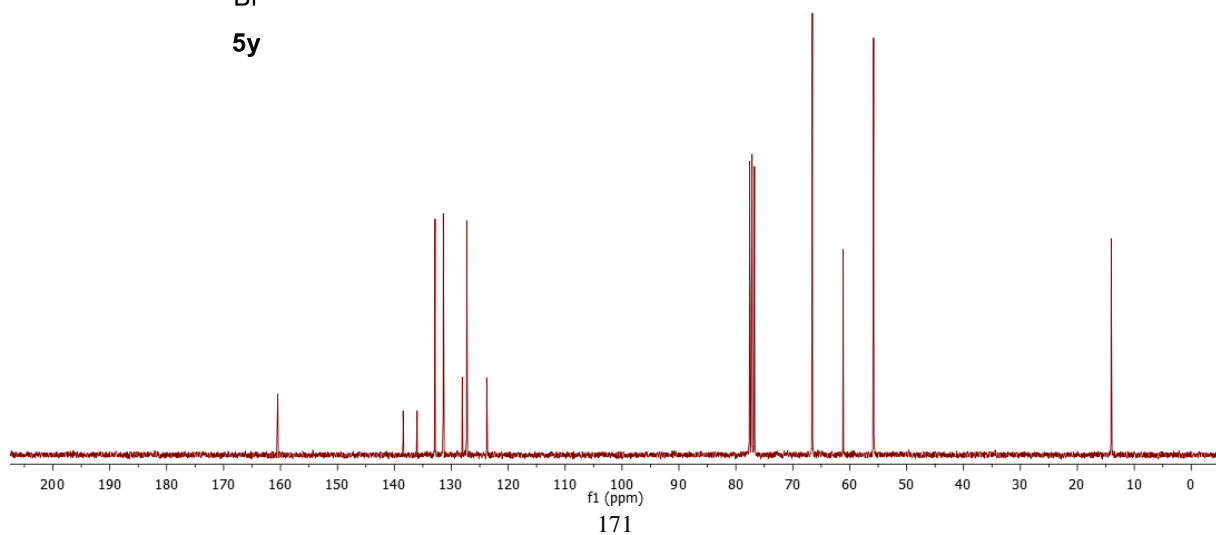



# <sup>1</sup>H NMR (300 MHz, CDCl<sub>3</sub>)

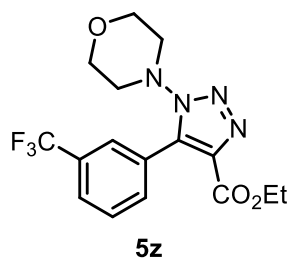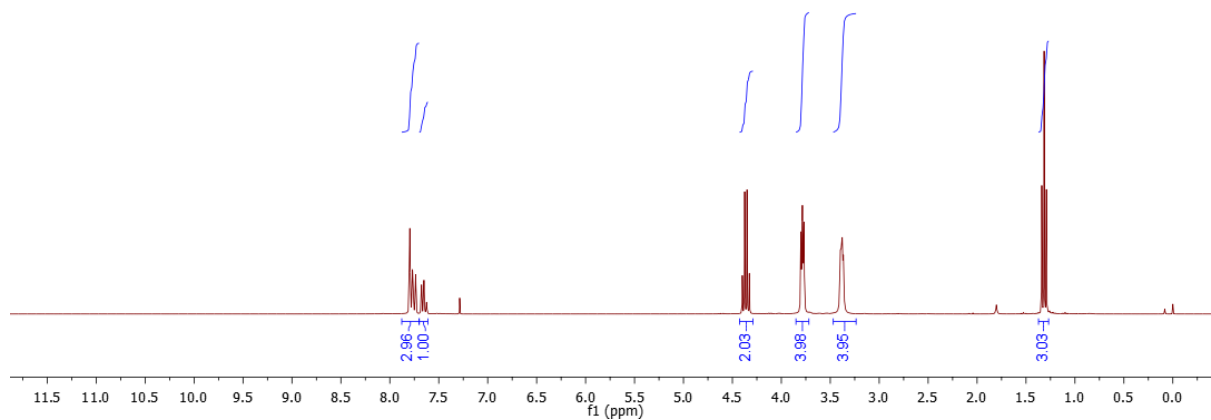

# <sup>13</sup>C NMR (75 MHz, CDCl<sub>3</sub>)

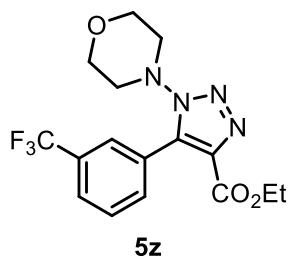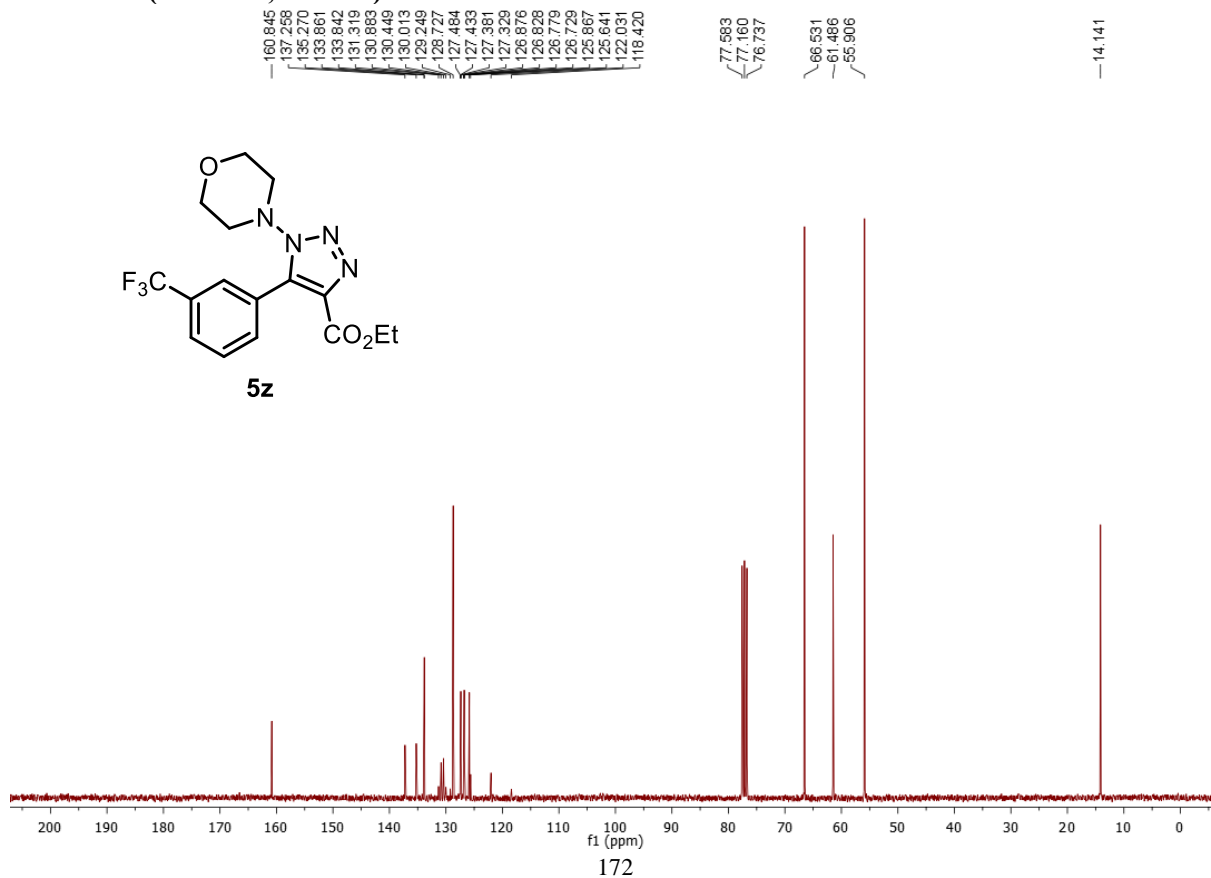

# <sup>1</sup>H NMR (300 MHz, CDCl<sub>3</sub>)

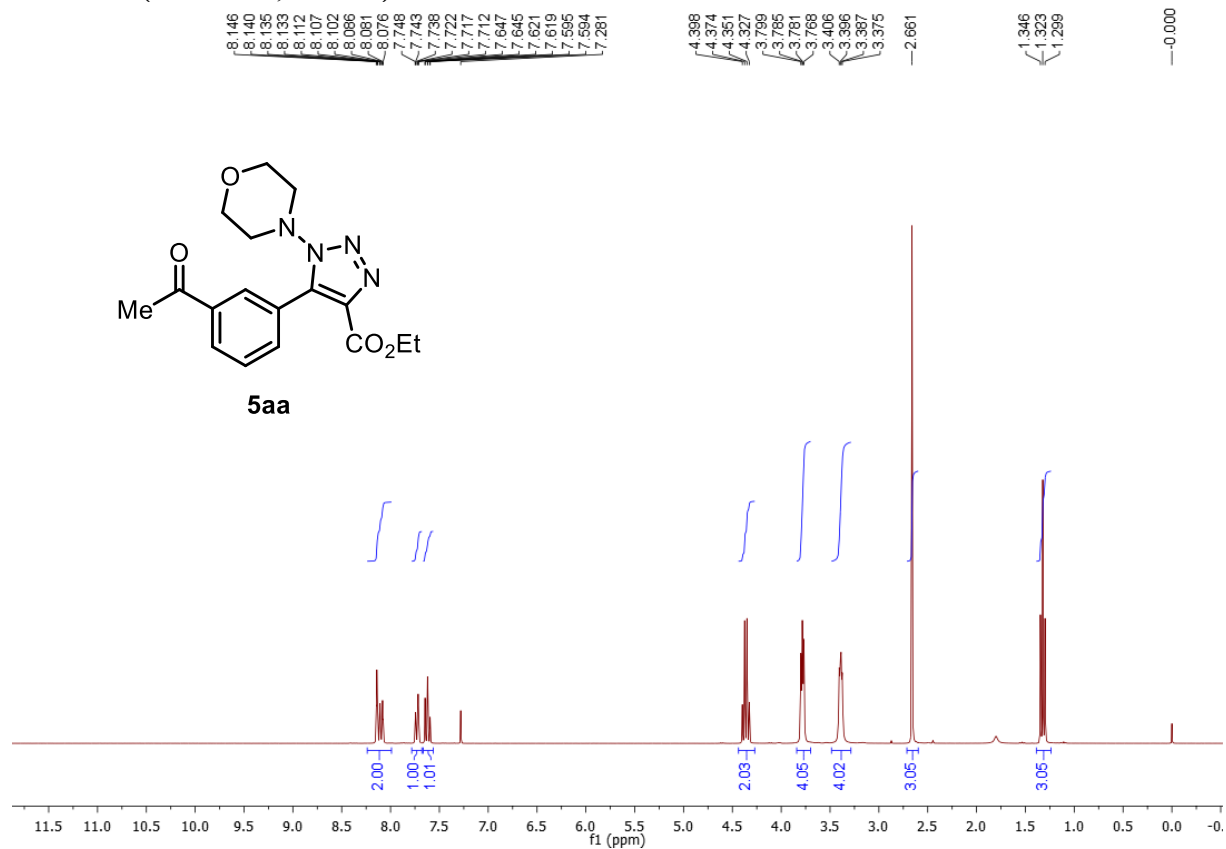

# <sup>13</sup>C NMR (75 MHz, CDCl<sub>3</sub>)

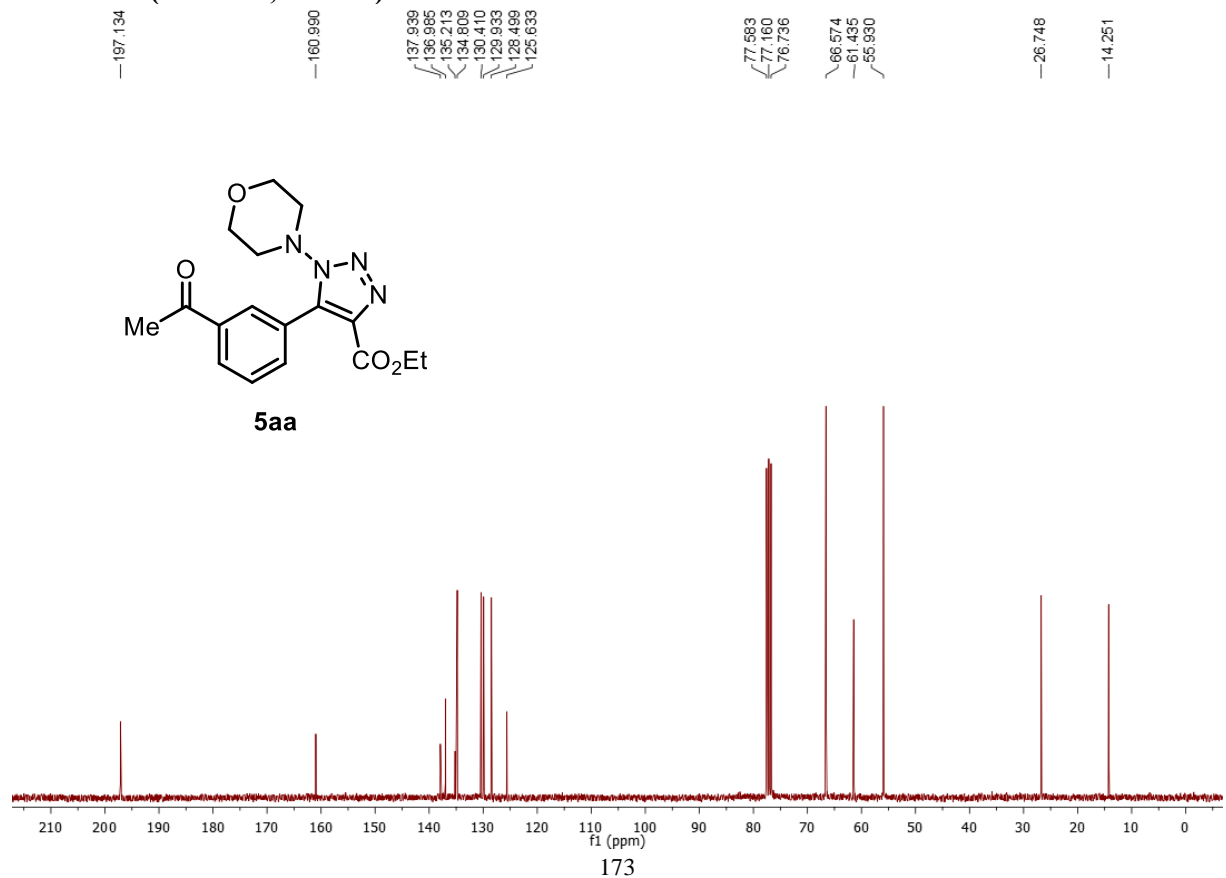

# <sup>1</sup>H NMR (300 MHz, CDCl<sub>3</sub>)

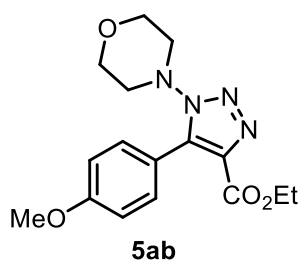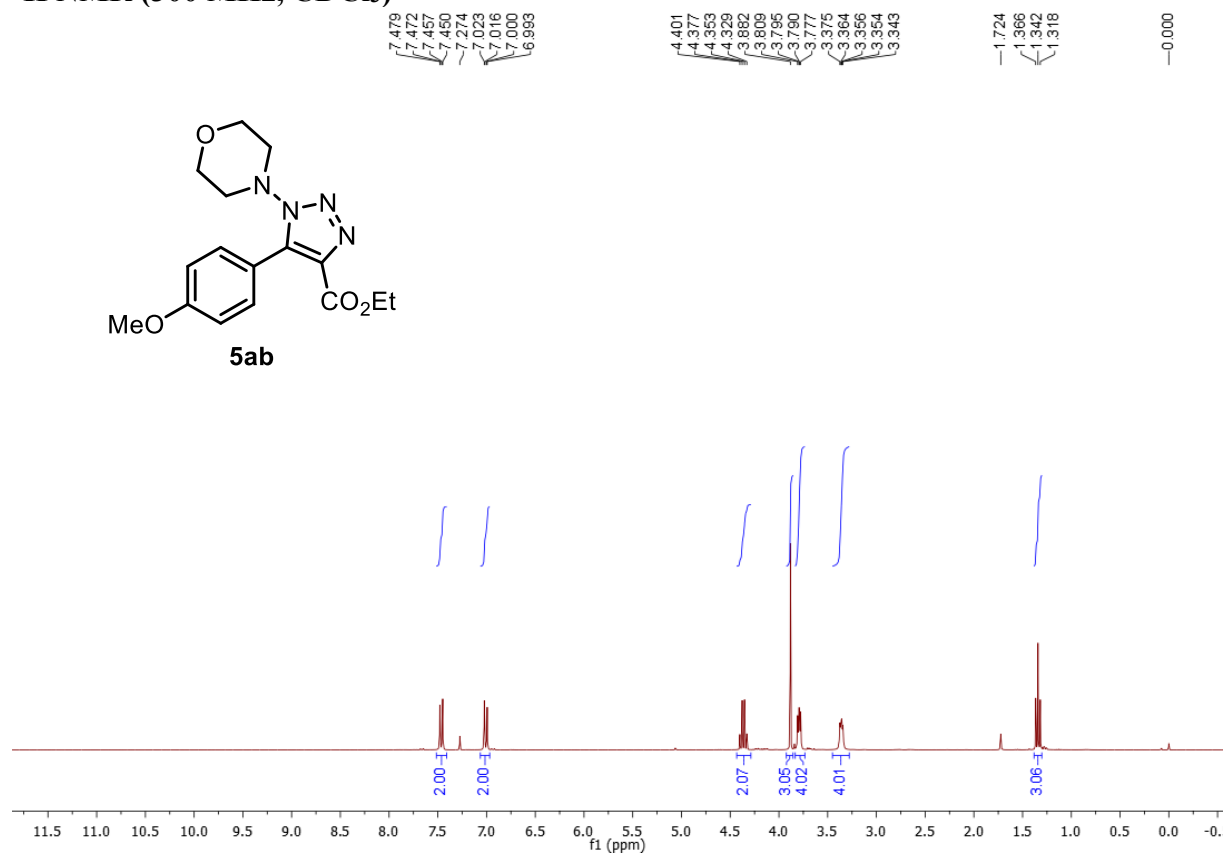

# <sup>13</sup>C NMR (75 MHz, CDCl<sub>3</sub>)

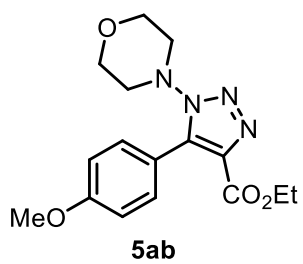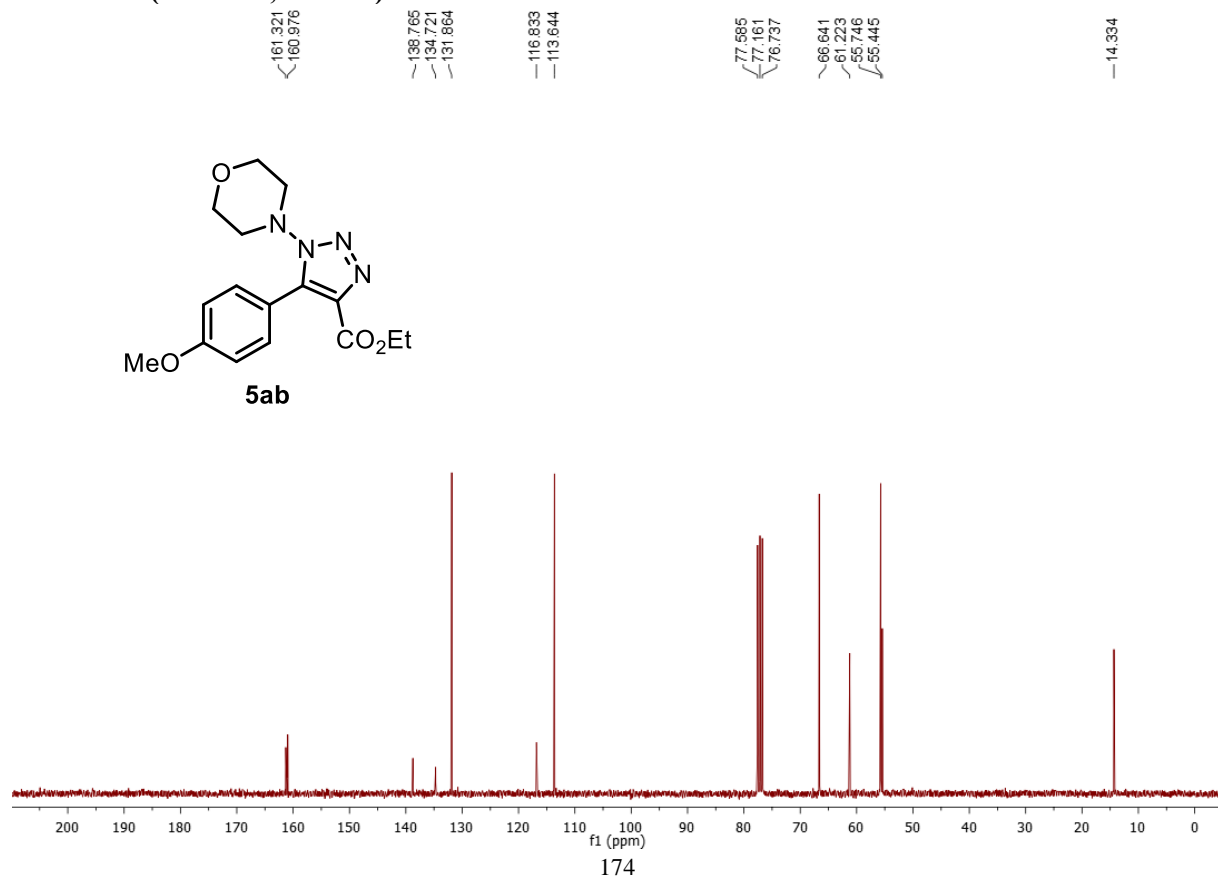

# <sup>1</sup>H NMR (300 MHz, CDCl<sub>3</sub>)

7.742, 7.735, 7.729, 7.714, 7.707, 7.701, 7.681, 7.676, 7.669, 7.669, 7.652, 7.649, 7.641, 7.604, 7.596, 7.591, 7.575, 7.569, 7.563, 7.511, 7.507, 7.501, 7.490, 7.483, 7.478, 7.463, 7.458, 7.450, 7.425, 7.420, 7.416, 7.404, 7.396, 7.388, 7.376, 7.372, 7.368, 7.265, 4.415, 4.391, 4.367, 4.343, 3.821, 3.807, 3.802, 3.789, 3.412, 3.401, 3.382, 3.360, -1.731, -1.367, -1.343, -1.320, -0.000

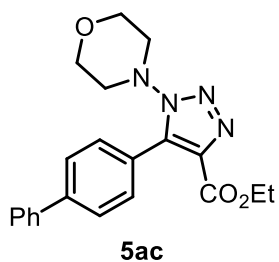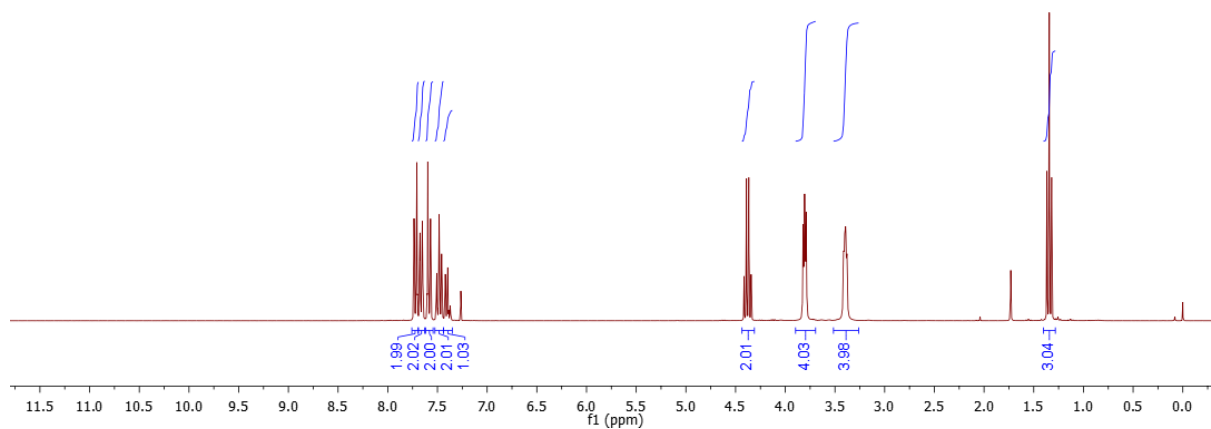

# <sup>13</sup>C NMR (75 MHz, CDCl<sub>3</sub>)

161.209, 142.876, 140.175, 138.660, 136.076, 130.779, 129.037, 128.043, 127.257, 126.766, 123.722, 77.583, 77.160, 76.796, 66.615, 61.326, 55.866, -14.302

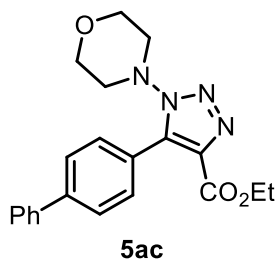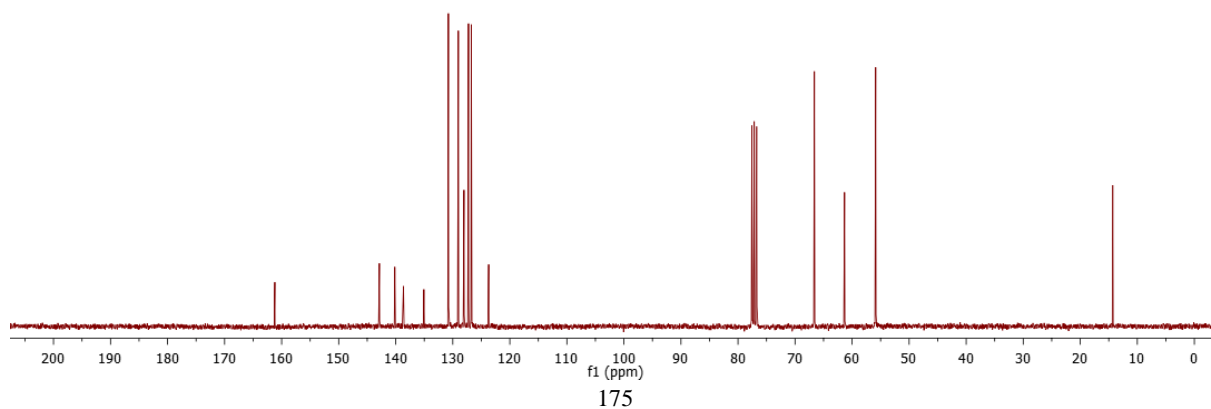

# <sup>1</sup>H NMR (300 MHz, CDCl<sub>3</sub>)

7.528  
7.520  
7.510  
7.505  
7.503  
7.498  
7.481  
7.282  
7.223  
7.216  
7.201  
7.195  
7.188  
7.172  
7.165

4.394  
4.370  
4.346  
4.323  
3.803  
3.789  
3.785  
3.771  
3.376  
3.366  
3.357  
3.345

1.354  
1.331  
1.307

-0.000

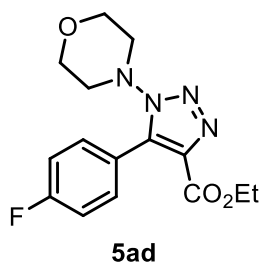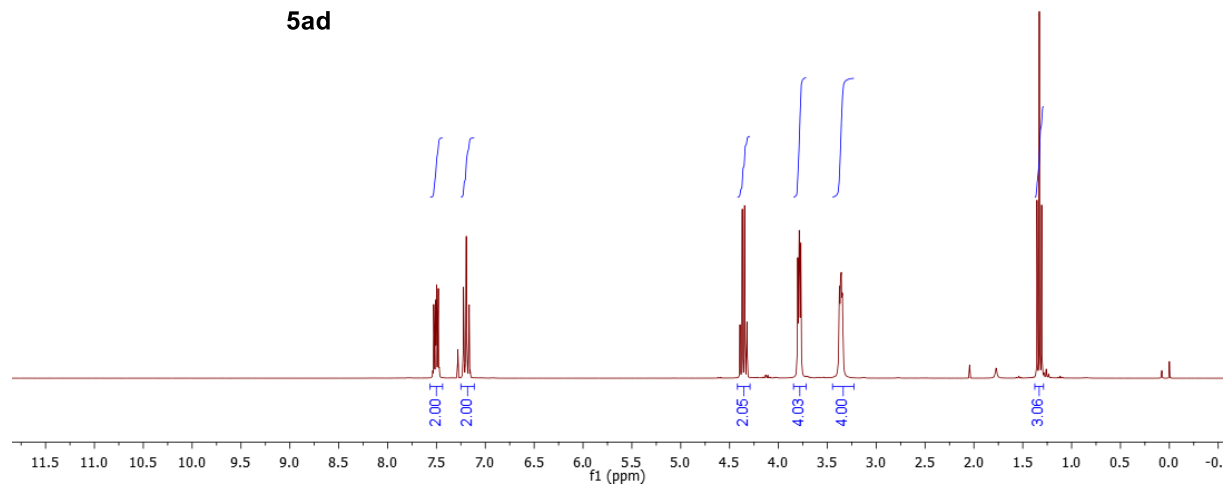

# <sup>13</sup>C NMR (75 MHz, CDCl<sub>3</sub>)

165.364  
162.057  
161.073

137.986  
135.036  
132.506  
132.392

120.975  
120.927  
115.601  
115.310

77.583  
77.158  
76.734

66.565  
61.344  
55.819

14.258

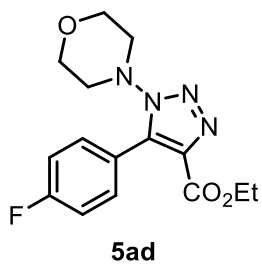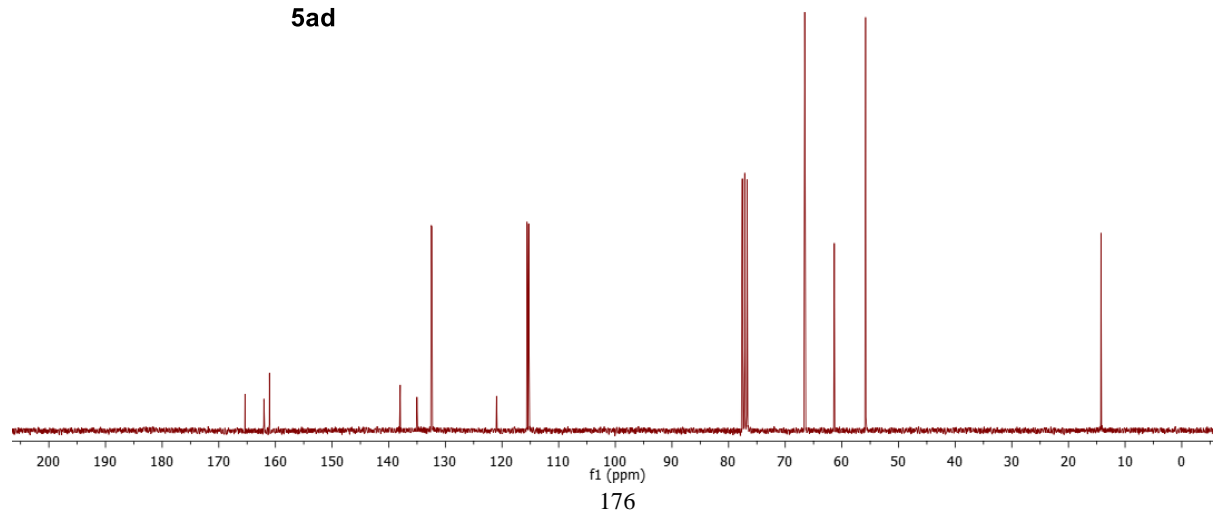

# <sup>1</sup>H NMR (300 MHz, CDCl<sub>3</sub>)

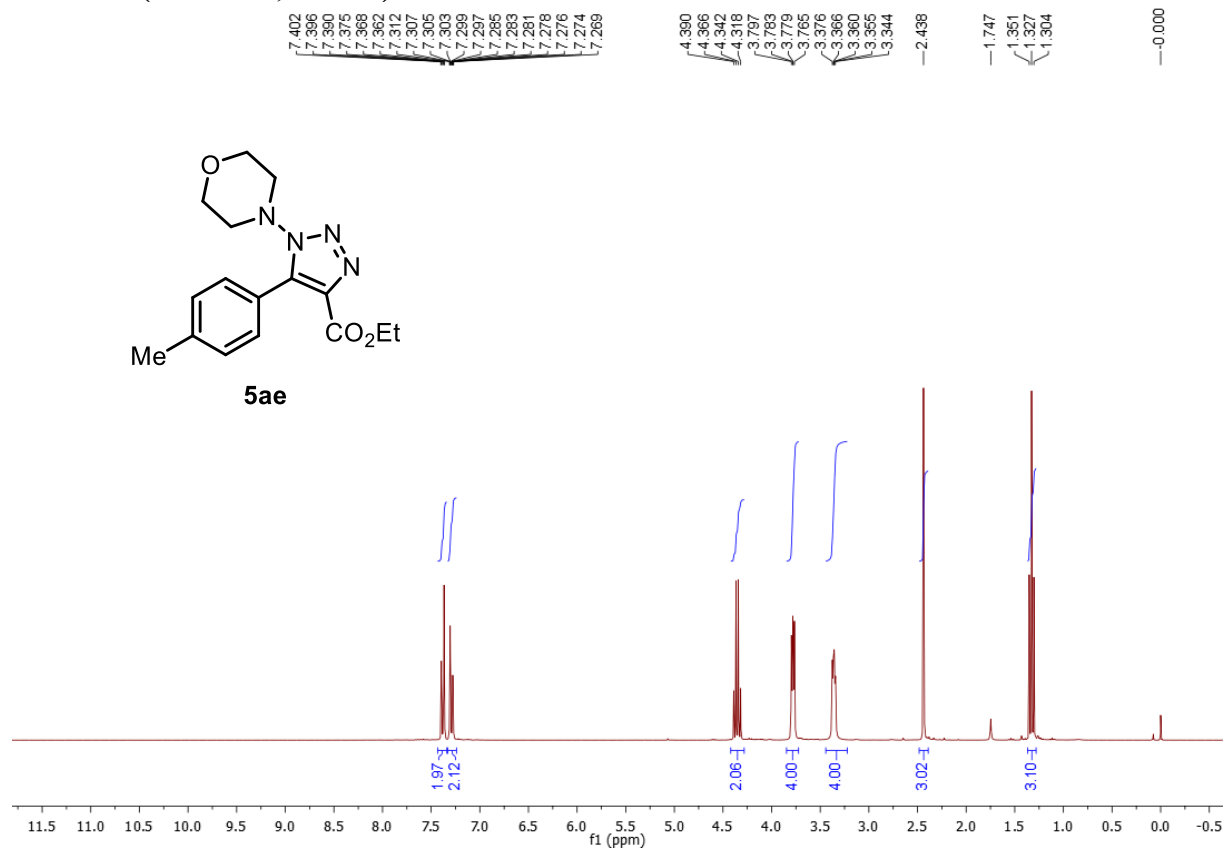

# <sup>13</sup>C NMR (75 MHz, CDCl<sub>3</sub>)

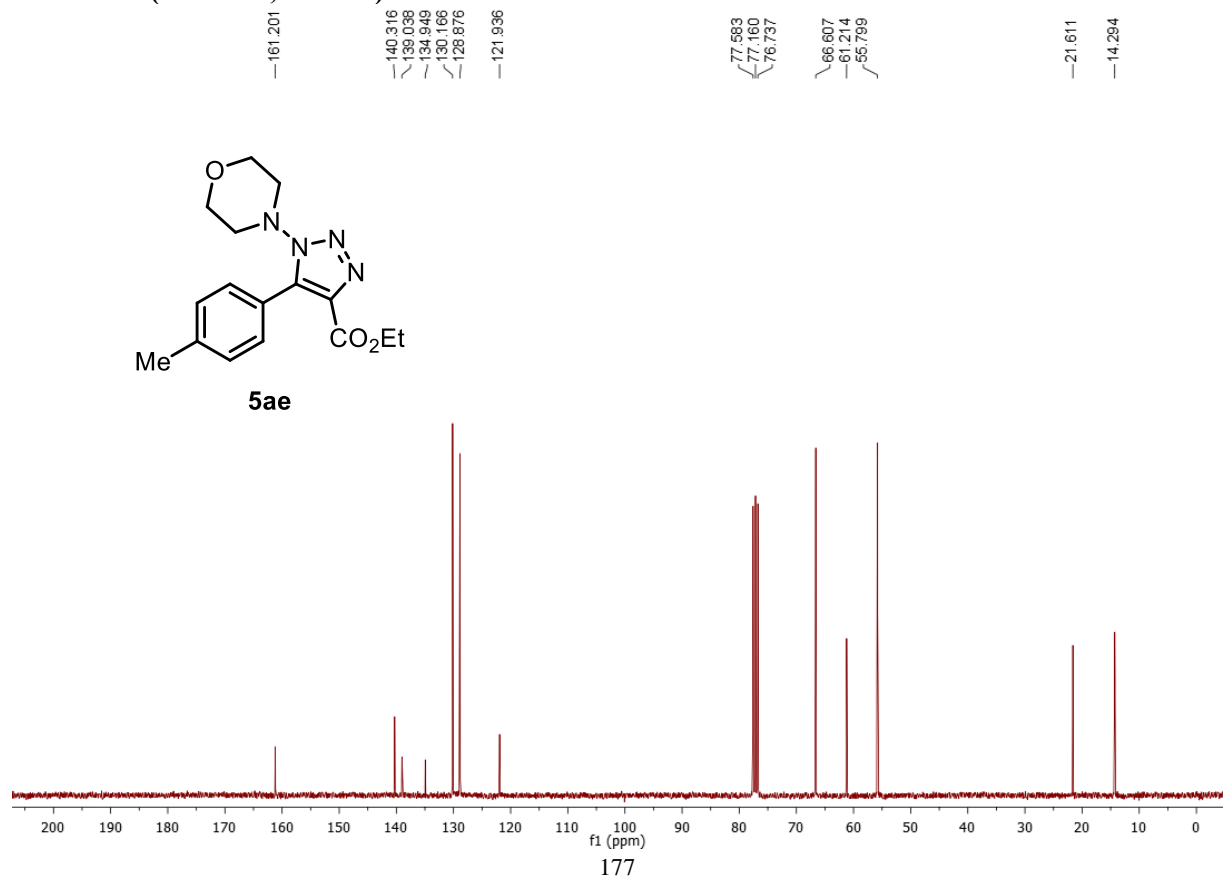

# <sup>1</sup>H NMR (300 MHz, CDCl<sub>3</sub>)

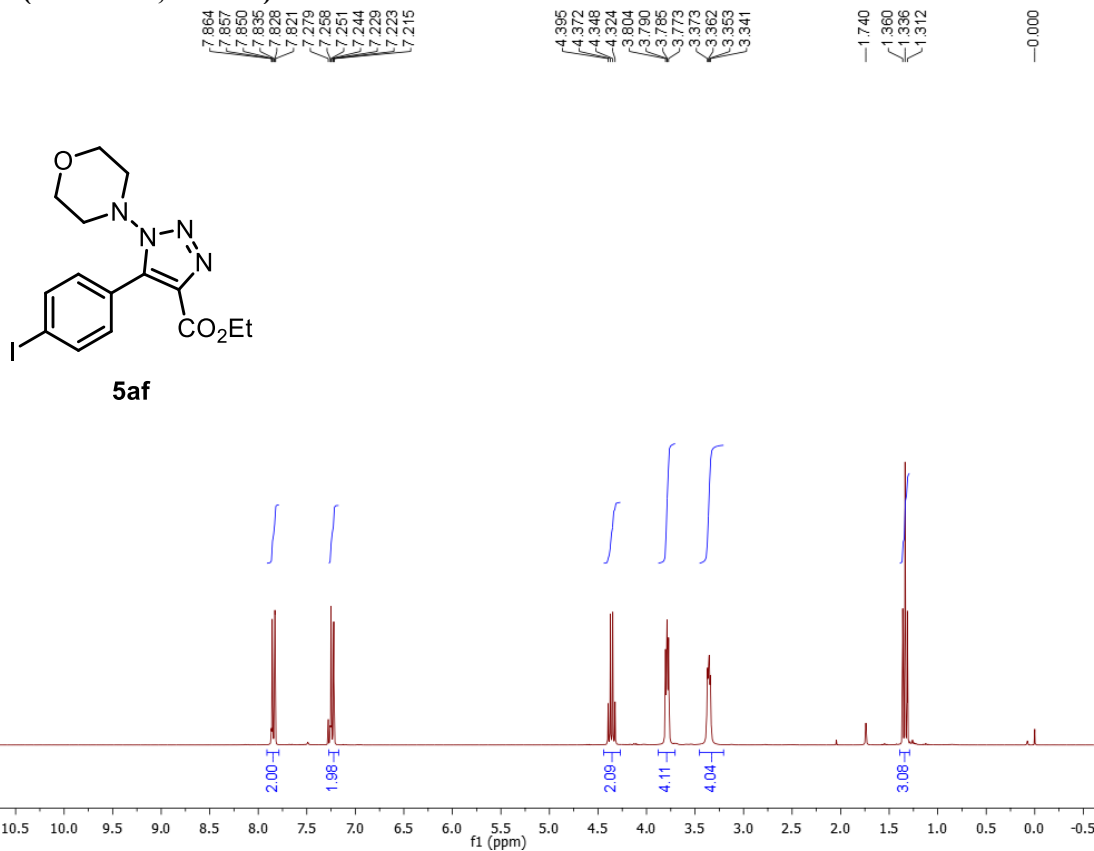

# <sup>13</sup>C NMR (75 MHz, CDCl<sub>3</sub>)

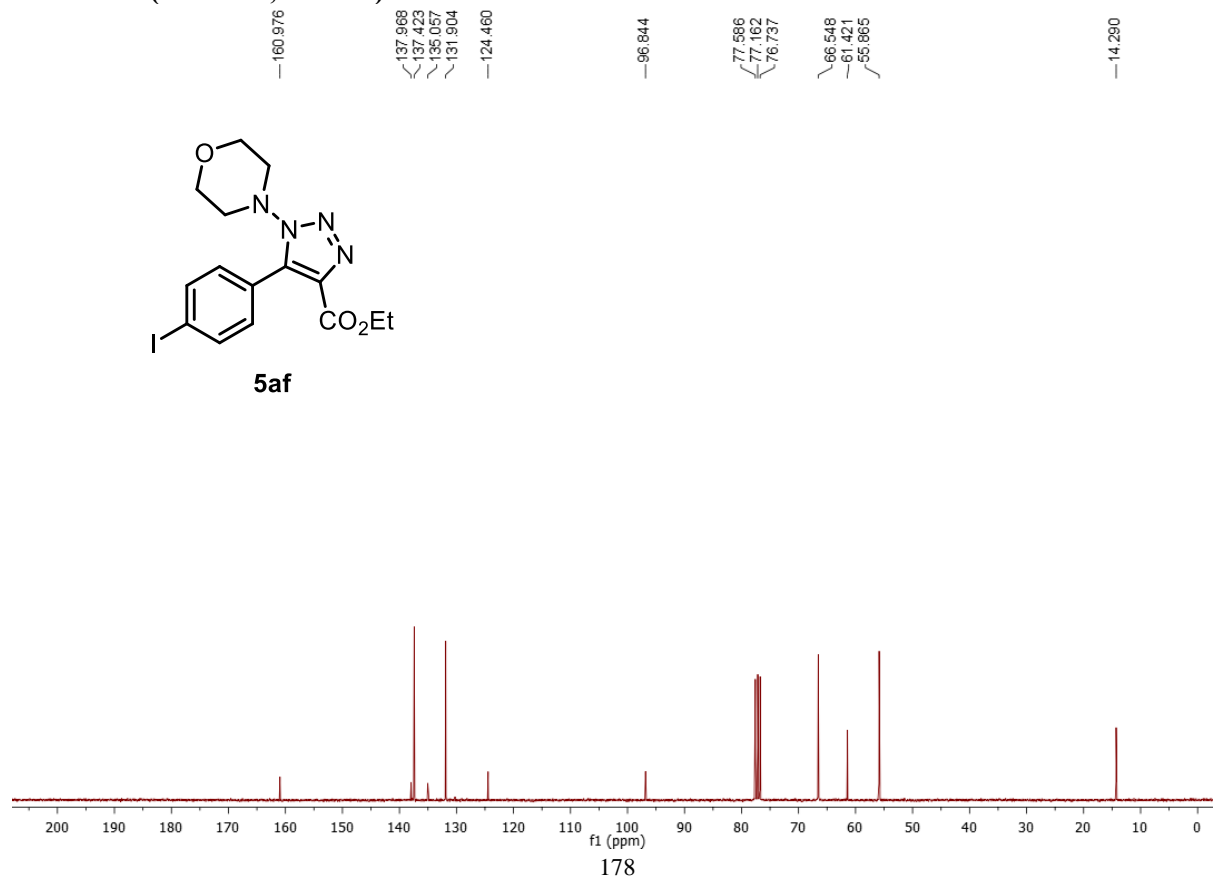

# <sup>1</sup>H NMR (300 MHz, CDCl<sub>3</sub>)

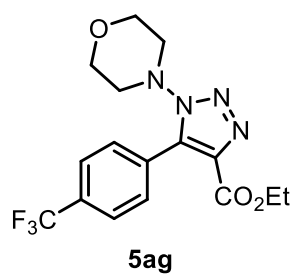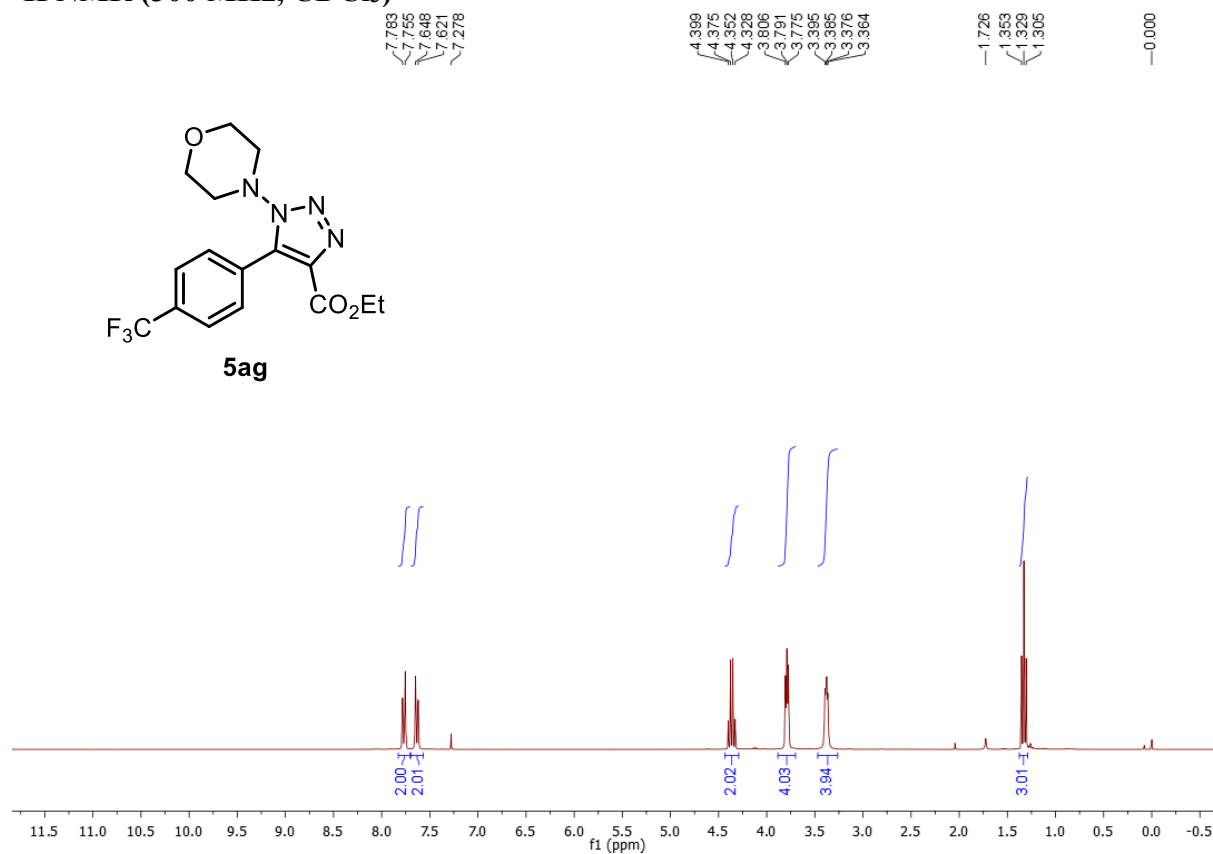

# <sup>13</sup>C NMR (75 MHz, CDCl<sub>3</sub>)

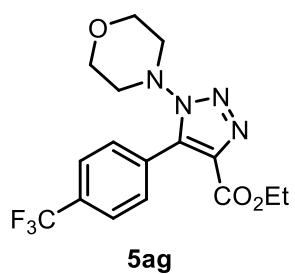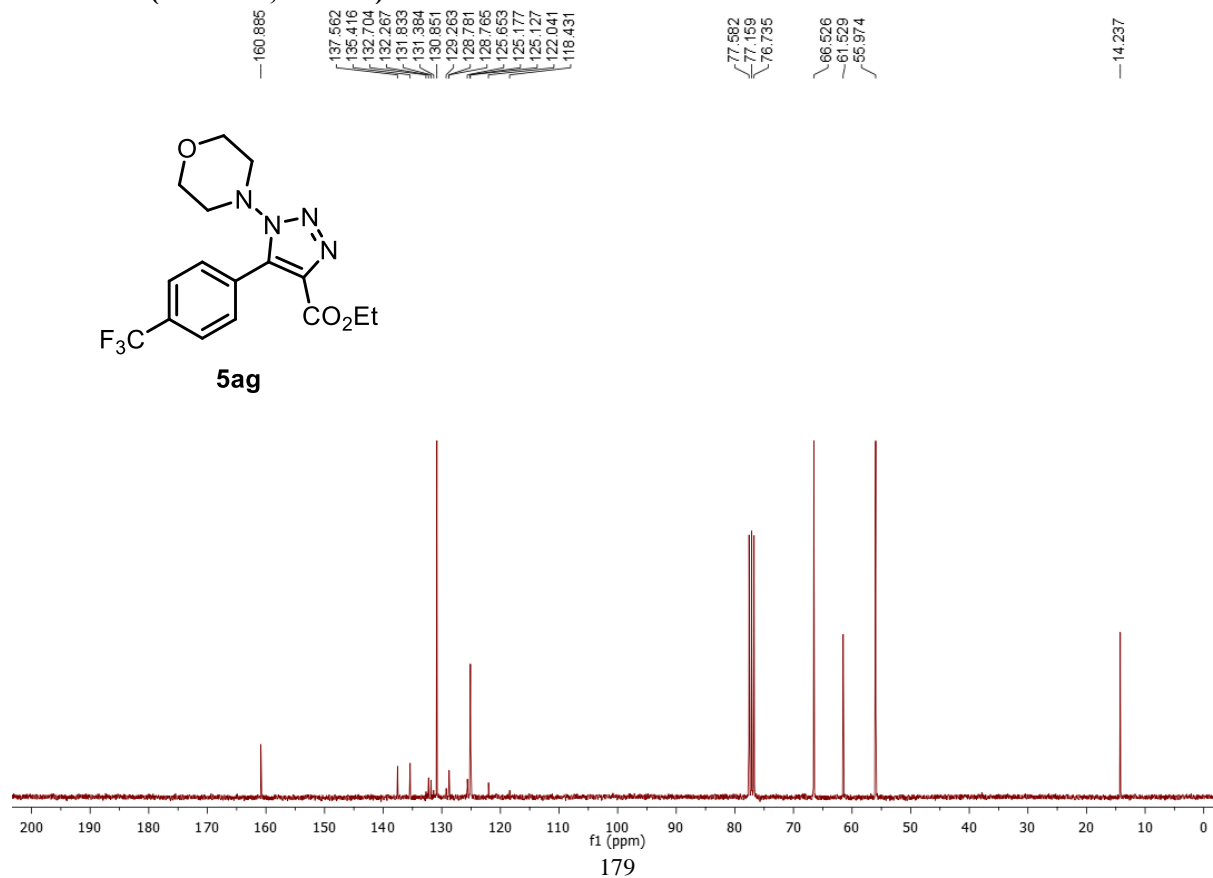



# <sup>1</sup>H NMR (300 MHz, CDCl<sub>3</sub>)

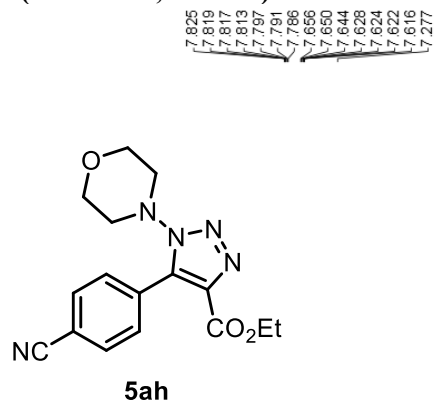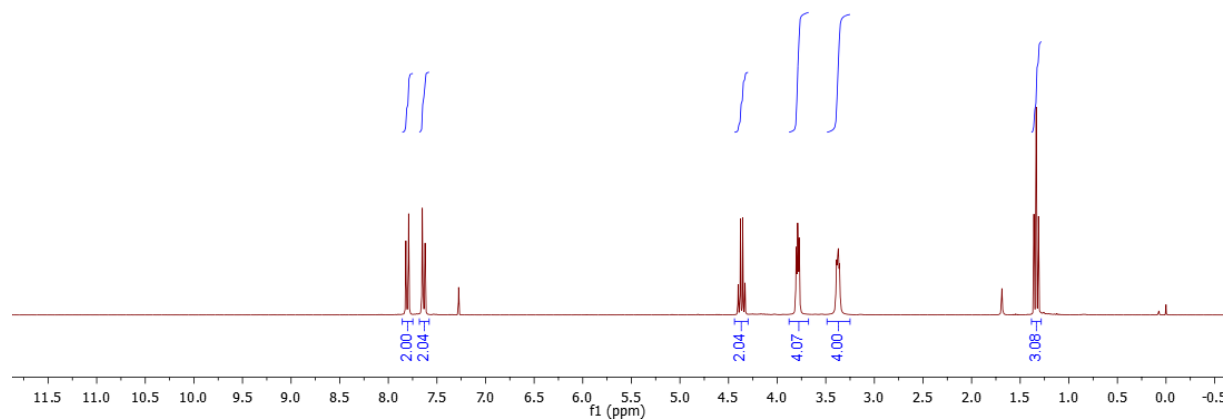

# <sup>13</sup>C NMR (75 MHz, CDCl<sub>3</sub>)

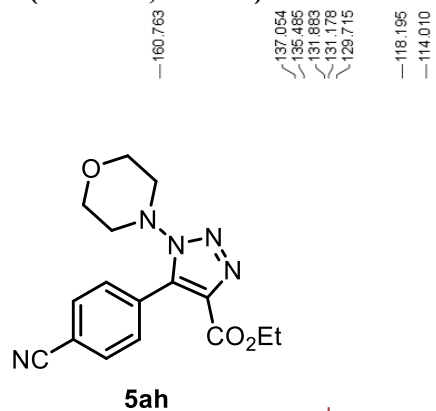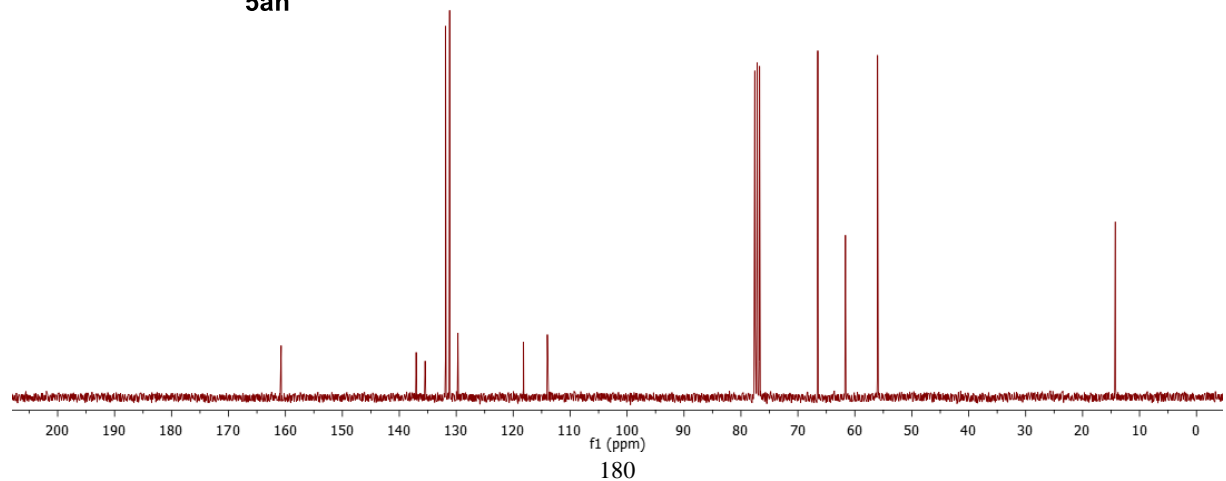

# <sup>1</sup>H NMR (300 MHz, CDCl<sub>3</sub>)

7.500  
7.497  
7.491  
7.479  
7.470  
7.459  
7.450  
7.438  
7.432  
7.429  
7.282

4.394  
4.371  
4.347  
4.323  
3.803  
3.789  
3.784  
3.771  
3.375  
3.364  
3.355  
3.343

1.357  
1.333  
1.309

-0.000

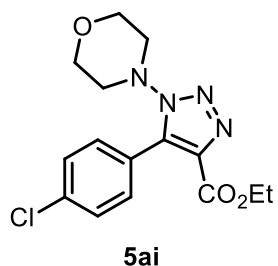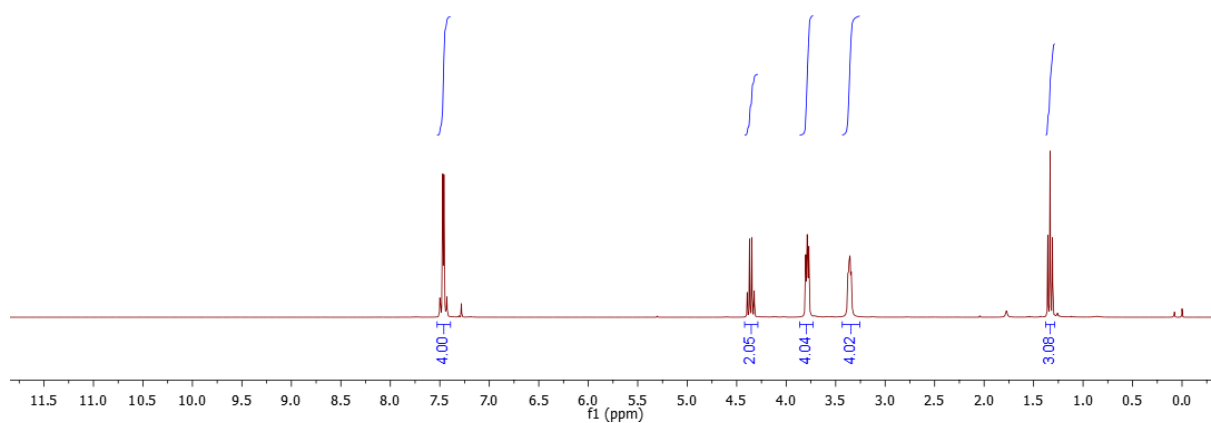

# <sup>13</sup>C NMR (75 MHz, CDCl<sub>3</sub>)

160.990

137.813  
136.428  
135.113  
131.688  
128.533  
123.416

77.585  
77.160  
76.737

66.550  
61.389  
55.852

14.267

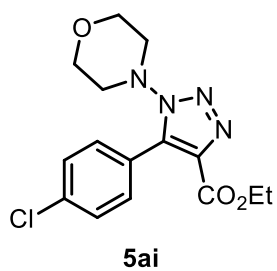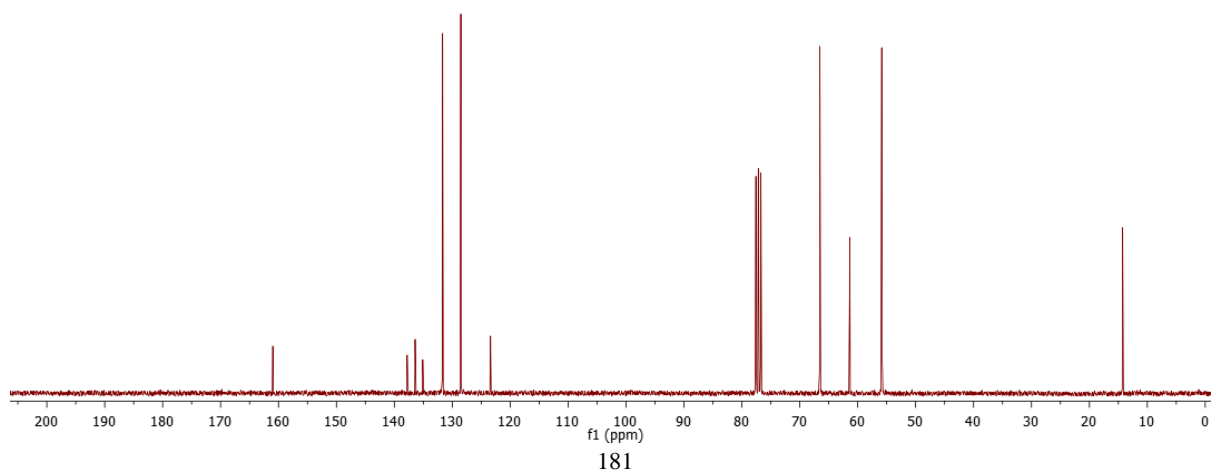

# <sup>1</sup>H NMR (300 MHz, CDCl<sub>3</sub>)

7.568, 7.562, 7.551, 7.543, 7.536, 7.526, 7.520, 7.516, 7.509, 7.498, 7.492, 7.396, 7.390, 7.371, 7.365, 7.348, 7.341, 7.307, 7.303, 7.282, 7.279, 7.257, 7.254, 7.248, 7.244, 7.220, 7.216, 7.187, 7.184, 4.364, 4.340, 4.316, 4.293, 3.767, 3.752, 3.736, 3.381, 3.369, 3.361, 3.349, -1.782, 1.301, 1.277, 1.253, -0.000

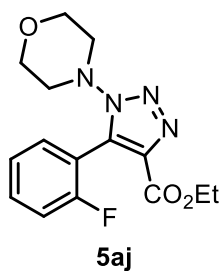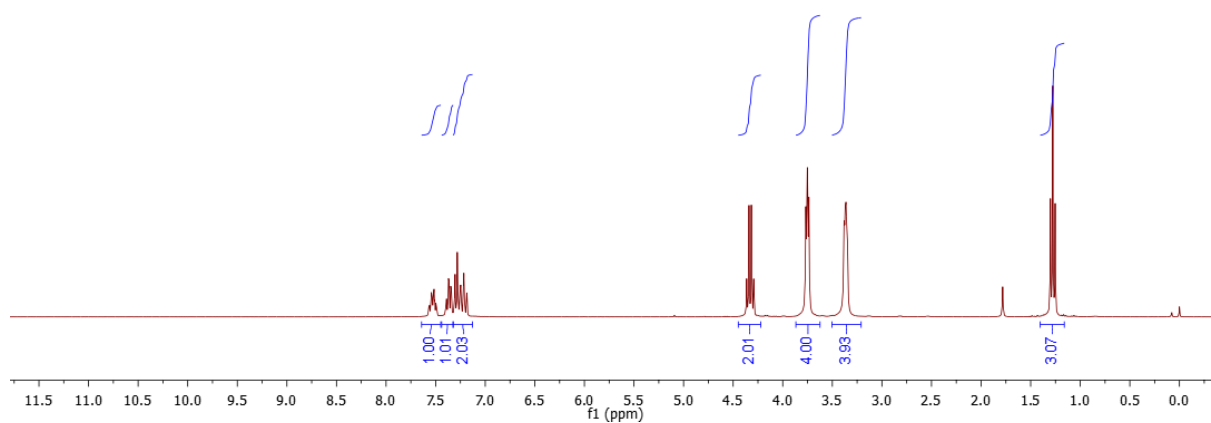

# <sup>13</sup>C NMR (75 MHz, CDCl<sub>3</sub>)

161.644, 160.708, 158.327, 135.956, 134.176, 132.389, 132.277, 132.082, 132.066, 124.009, 123.960, 115.974, 115.689, 113.977, 113.778, 77.585, 77.162, 76.738, 66.677, 61.256, 55.848, -14.153

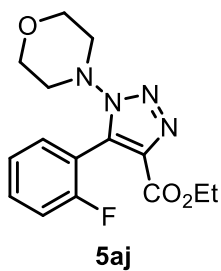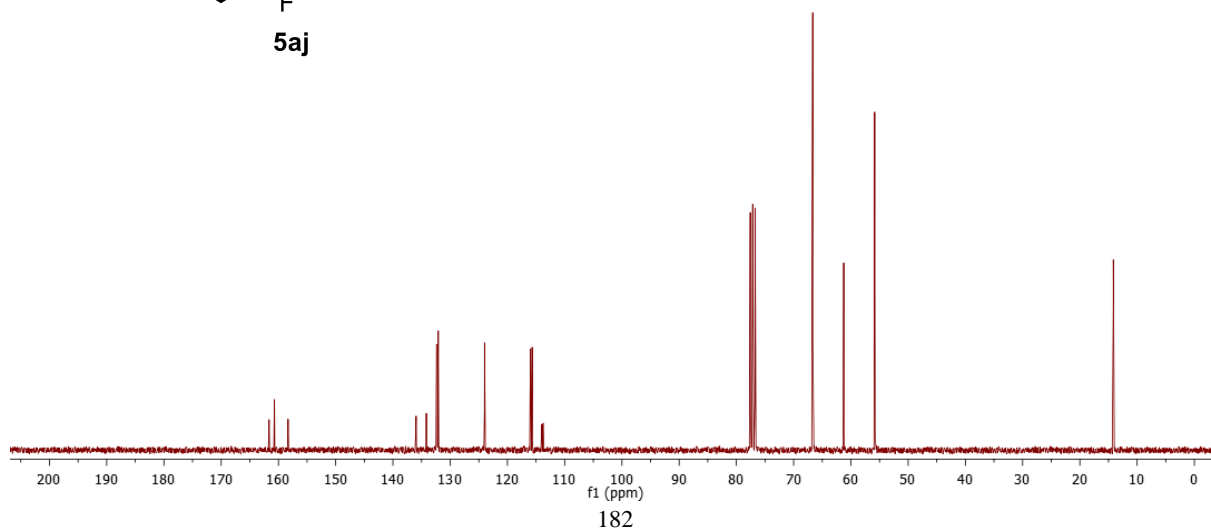

# <sup>1</sup>H NMR (300 MHz, CDCl<sub>3</sub>)

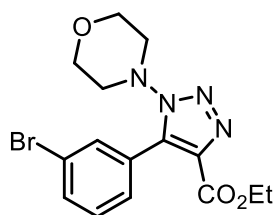

5ak

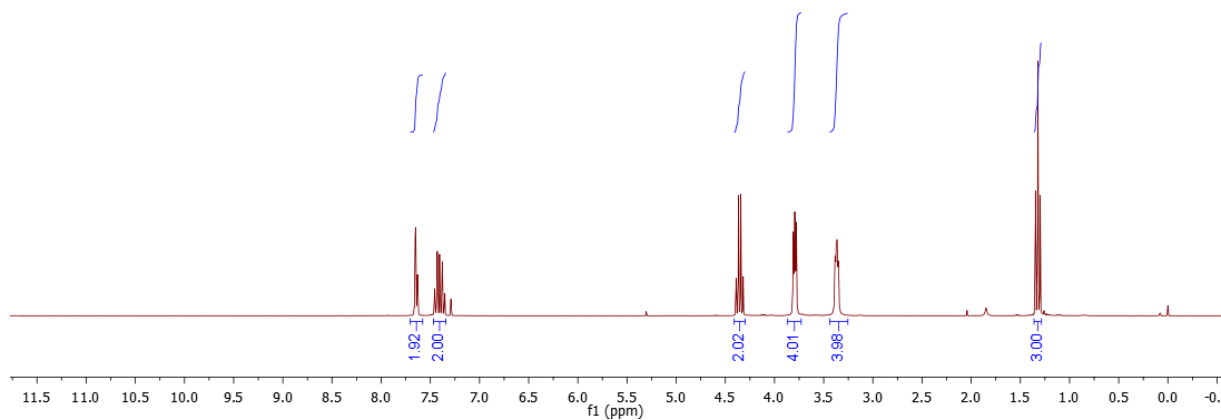

# <sup>13</sup>C NMR (75 MHz, CDCl<sub>3</sub>)

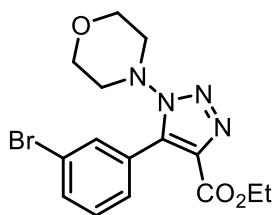

5ak

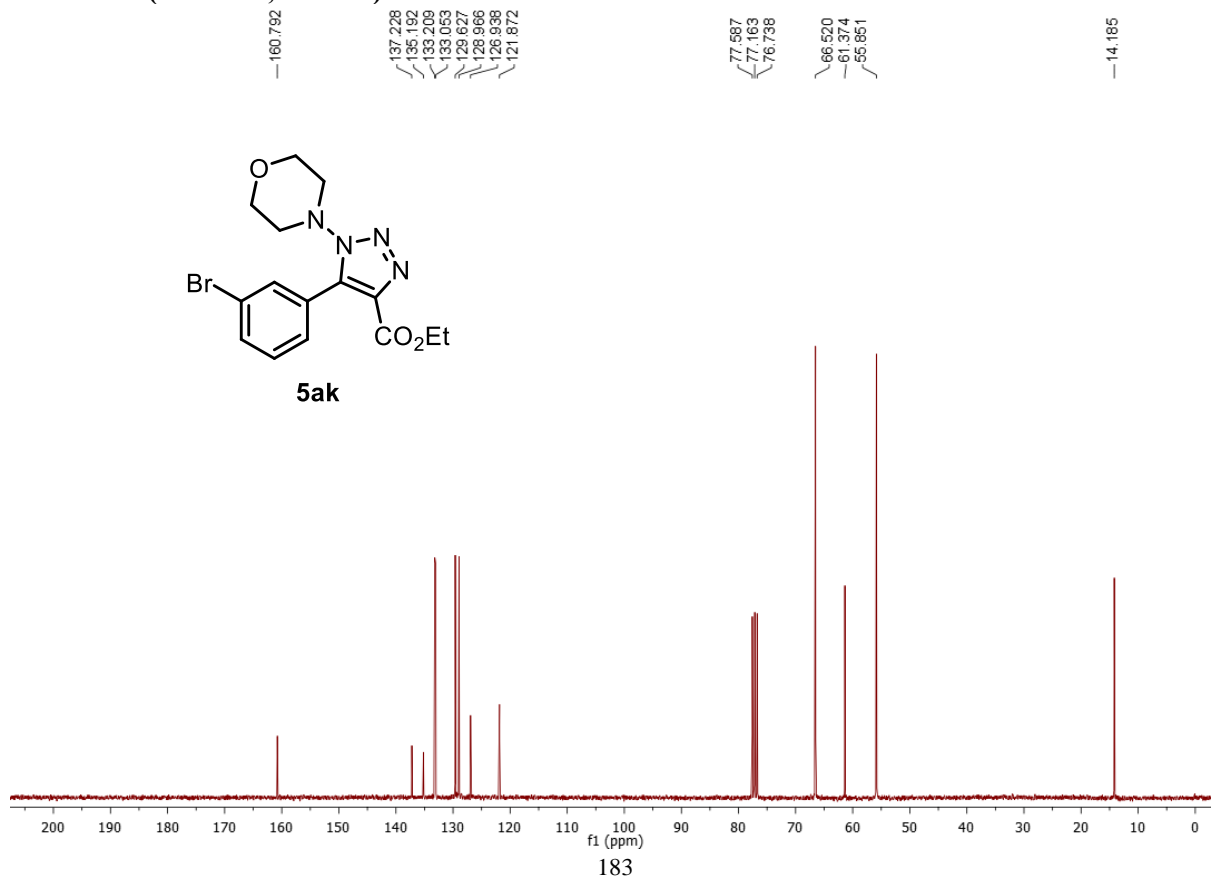

# <sup>1</sup>H NMR (300 MHz, CDCl<sub>3</sub>)

7.435, 7.430, 7.410, 7.405, 7.385, 7.380, 7.344, 7.342, 7.339, 7.337, 7.334, 7.319, 7.316, 7.314, 7.311, 7.304, 7.303, 7.298, 7.279, 7.273, 7.256, 7.253, 7.251, 7.248, 7.115, 7.108, 7.088, 7.083, 4.316, 4.292, 4.268, 4.244, 3.723, 3.707, 3.691, 3.608, 3.593, 3.573, 3.556, 3.341, 3.317, 3.302, 3.285, 3.266, 3.250, 2.112, 1.248, 1.224, 1.200, -0.000

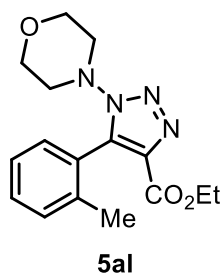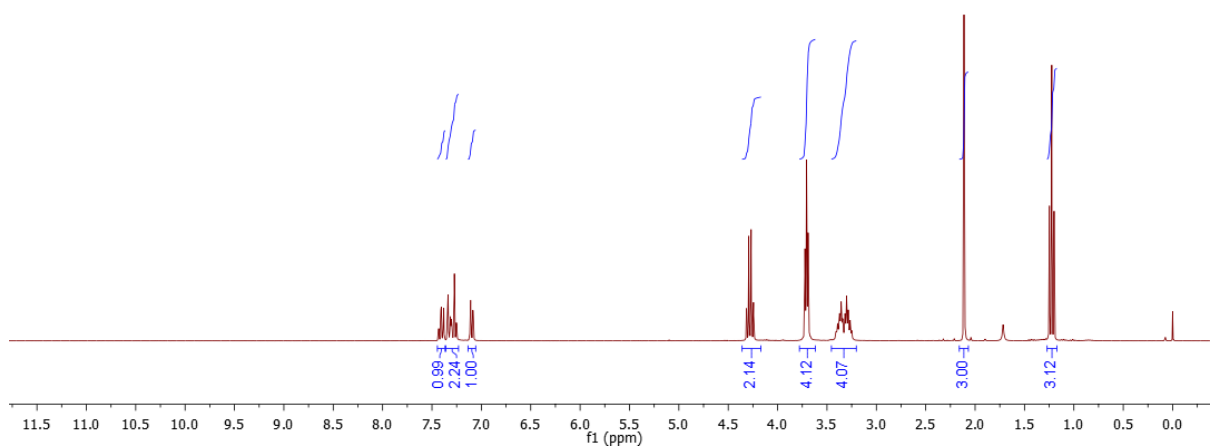

# <sup>13</sup>C NMR (75 MHz, CDCl<sub>3</sub>)

160.852, 138.995, 137.333, 135.908, 130.202, 130.066, 129.930, 125.684, 125.635, 77.584, 77.161, 76.737, 66.545, 61.099, 55.834, 19.688, 14.137

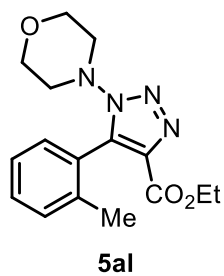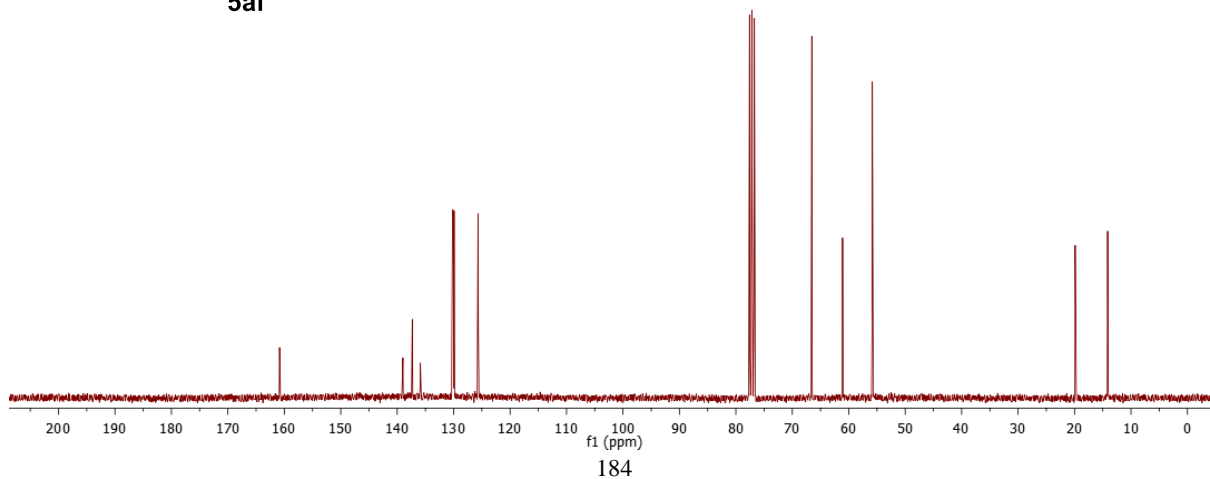

# <sup>1</sup>H NMR (300 MHz, CDCl<sub>3</sub>)

8.199  
8.194  
8.188  
8.177  
8.172  
8.167  
7.741  
7.736  
7.731  
7.715  
7.710  
7.705  
7.623  
7.617  
7.596  
7.589  
7.295

4.381  
4.368  
4.344  
4.320  
3.960  
3.798  
3.782  
3.767  
3.402  
3.391  
3.382  
3.370

-1.877

1.333  
1.309  
1.286

-0.000

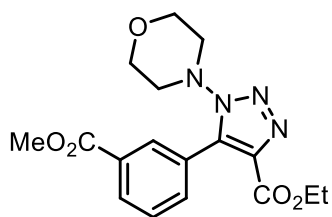

5am

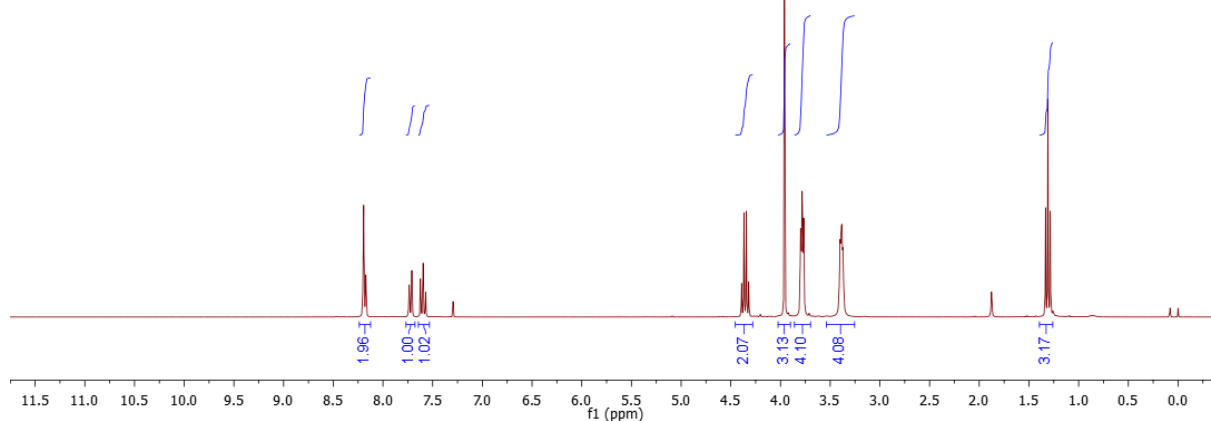

# <sup>13</sup>C NMR (75 MHz, CDCl<sub>3</sub>)

166.330  
160.911  
137.663  
135.171  
134.700  
131.637  
131.069  
130.288  
128.295  
125.430

77.584  
77.160  
76.735  
66.514  
61.360  
55.874  
52.482

-14.164

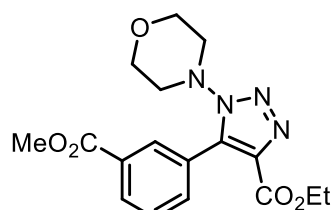

5am

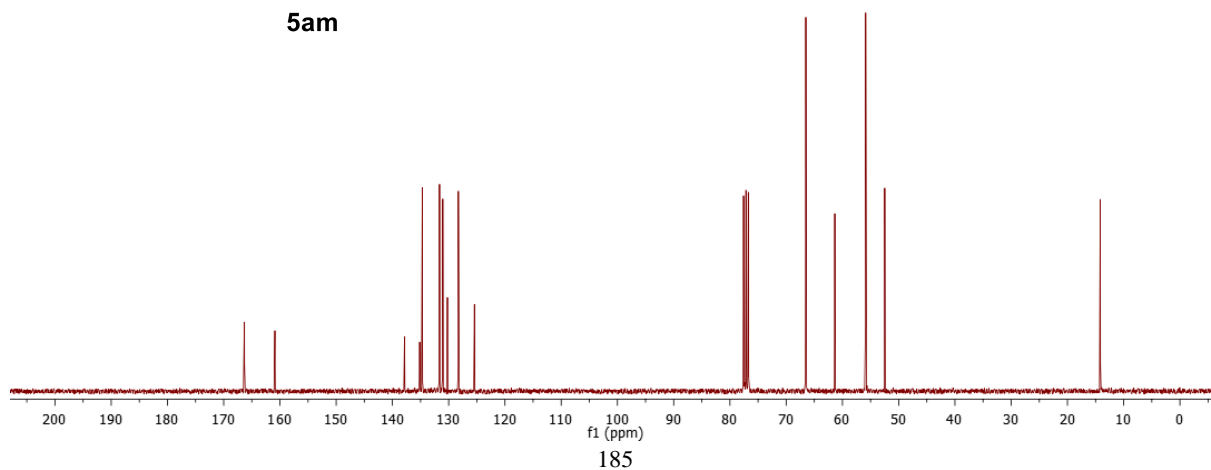

# <sup>1</sup>H NMR (300 MHz, CDCl<sub>3</sub>)

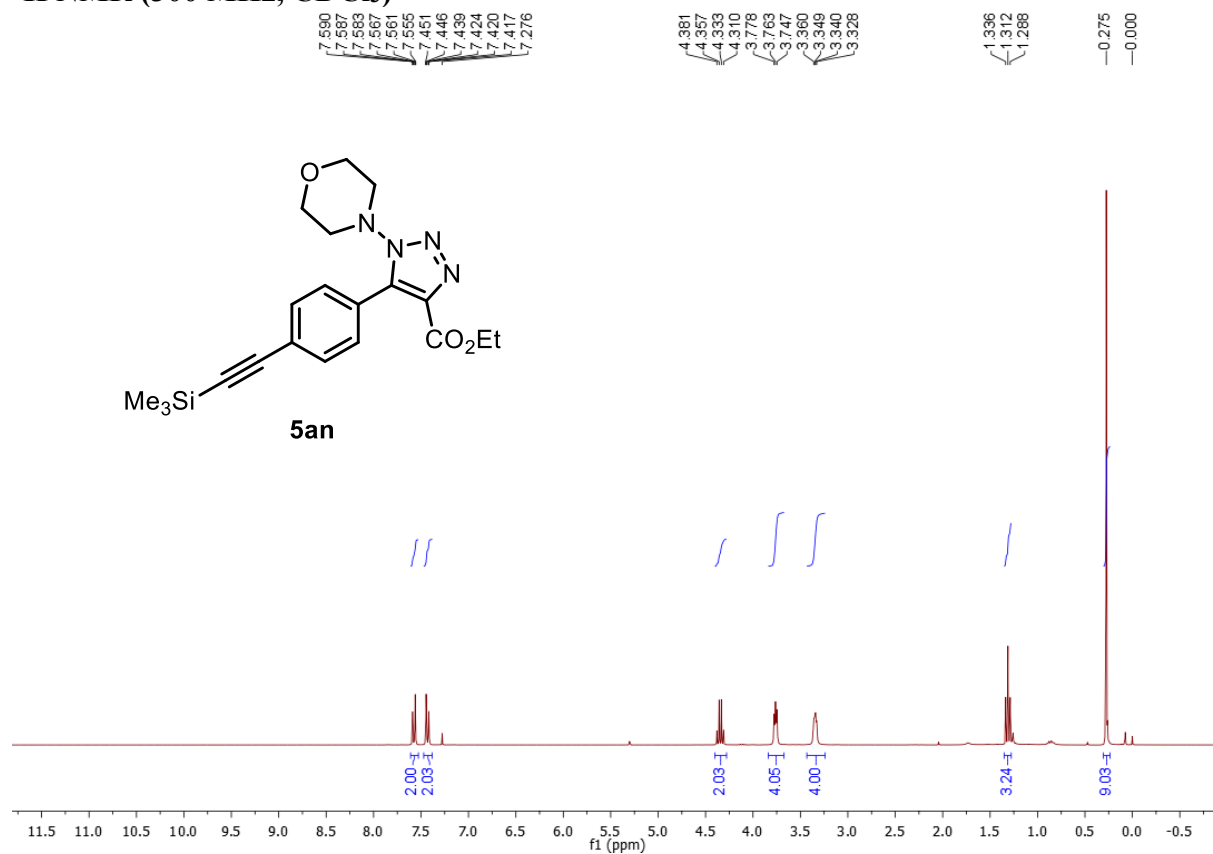

# <sup>13</sup>C NMR (75 MHz, CDCl<sub>3</sub>)

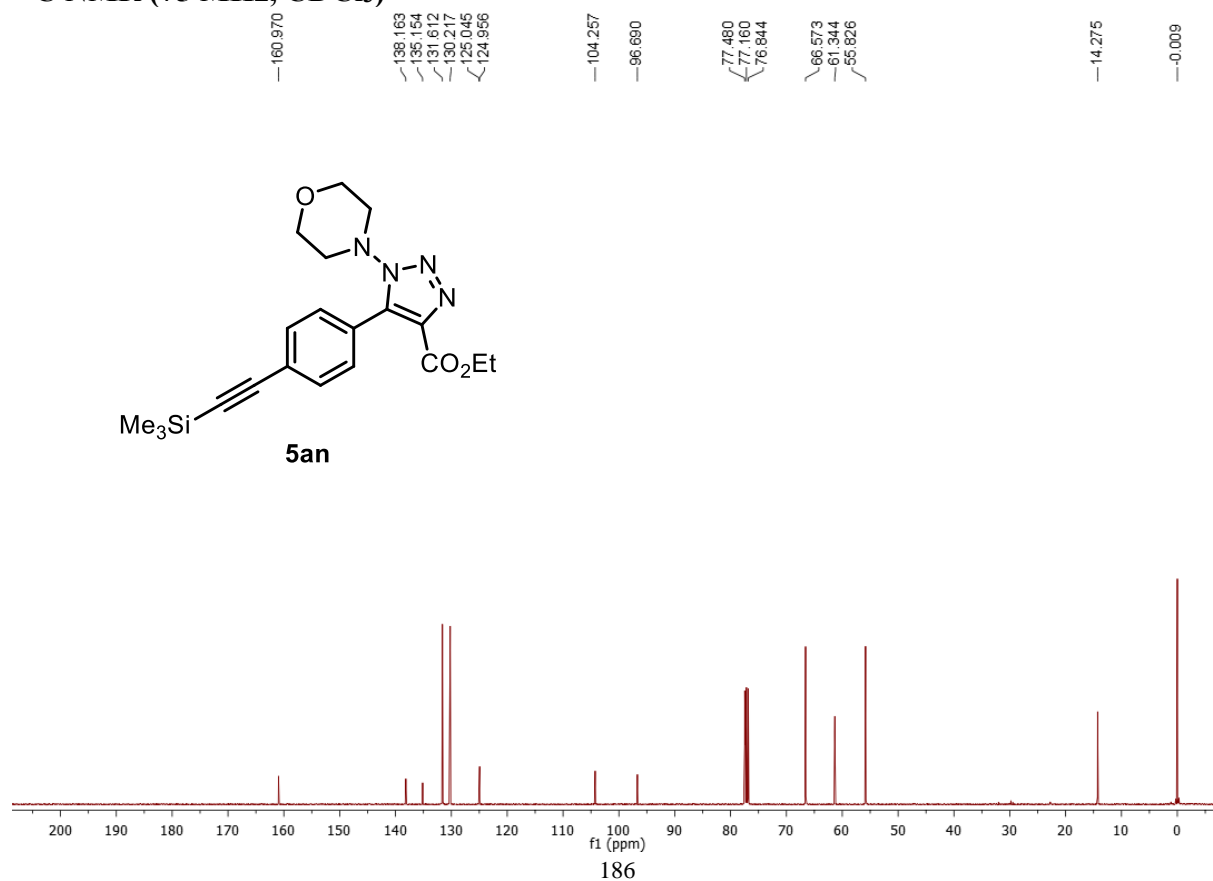

# <sup>1</sup>H NMR (300 MHz, CDCl<sub>3</sub>)

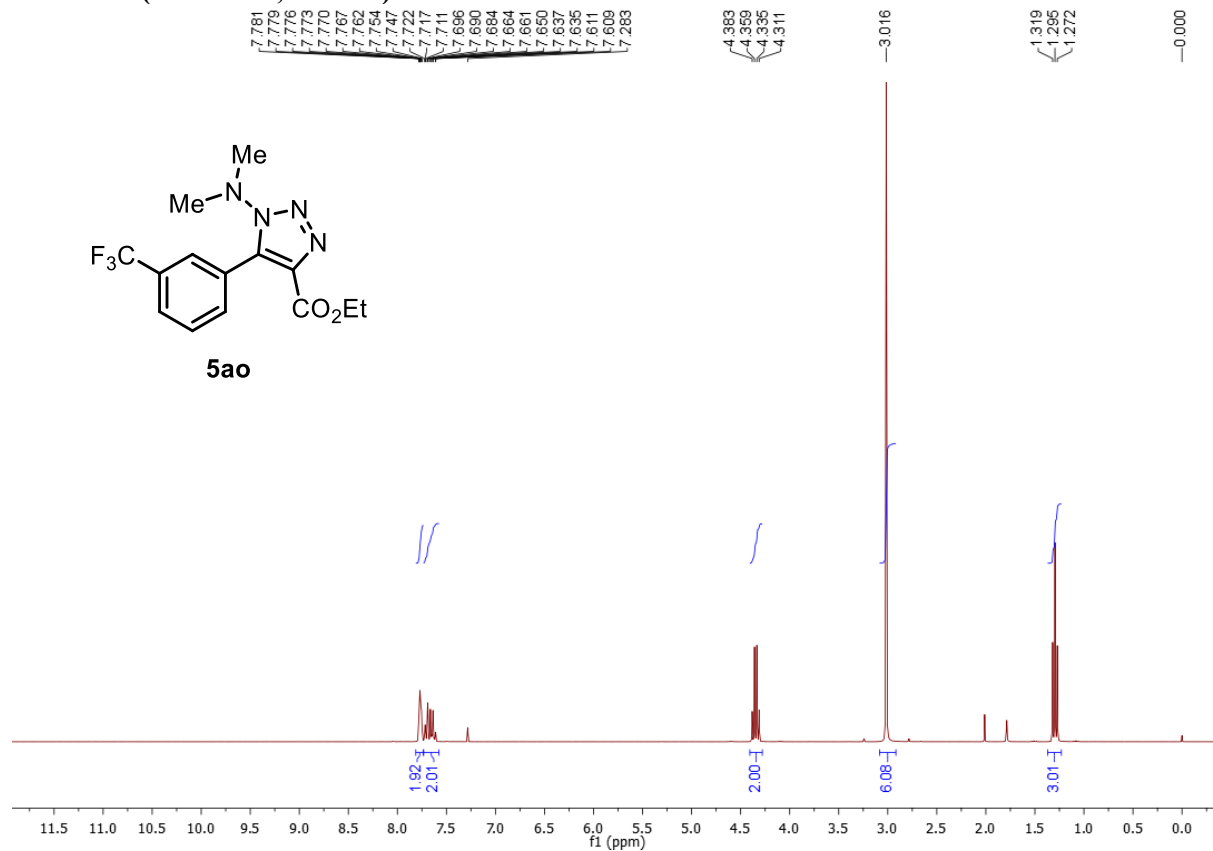

# <sup>13</sup>C NMR (75 MHz, CDCl<sub>3</sub>)

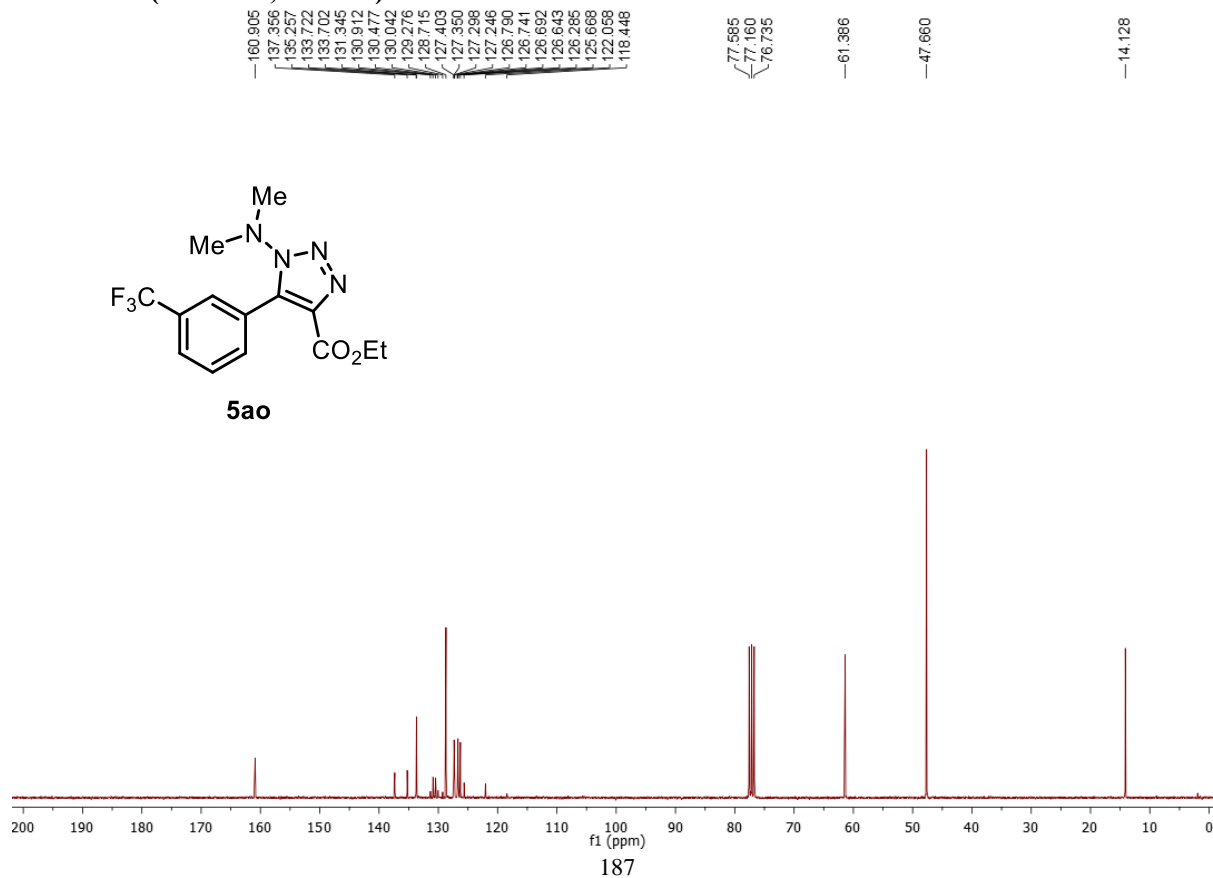



# <sup>1</sup>H NMR (300 MHz, CDCl<sub>3</sub>)

8.677  
7.489  
7.484  
7.480  
7.467  
7.460  
7.452  
7.439  
7.435  
7.430  
7.368  
7.363  
7.347  
7.342  
7.324  
7.317  
7.314  
7.279  
7.274  
7.270  
7.251  
7.247  
7.238  
7.234  
7.228  
7.222  
7.214  
7.209  
7.203  
7.196  
7.191  
7.184  
7.179  
7.174  
7.055  
7.045  
7.040  
7.034  
7.027  
7.021  
7.014  
4.445  
4.438

—2.048

—0.000

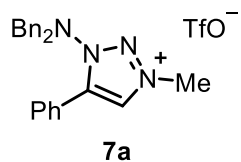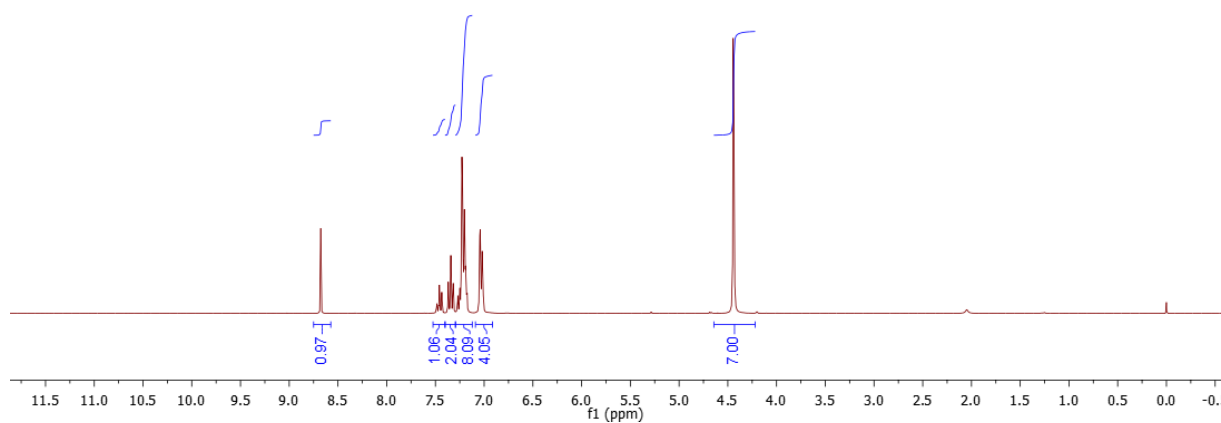

# <sup>13</sup>C NMR (75 MHz, CDCl<sub>3</sub>)

143.072  
132.981  
131.534  
129.394  
129.282  
129.106  
128.997  
128.970  
128.790  
127.143  
122.896  
121.457  
118.652  
114.407

77.583  
77.160  
76.736

—62.290

—41.466

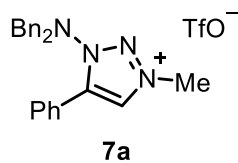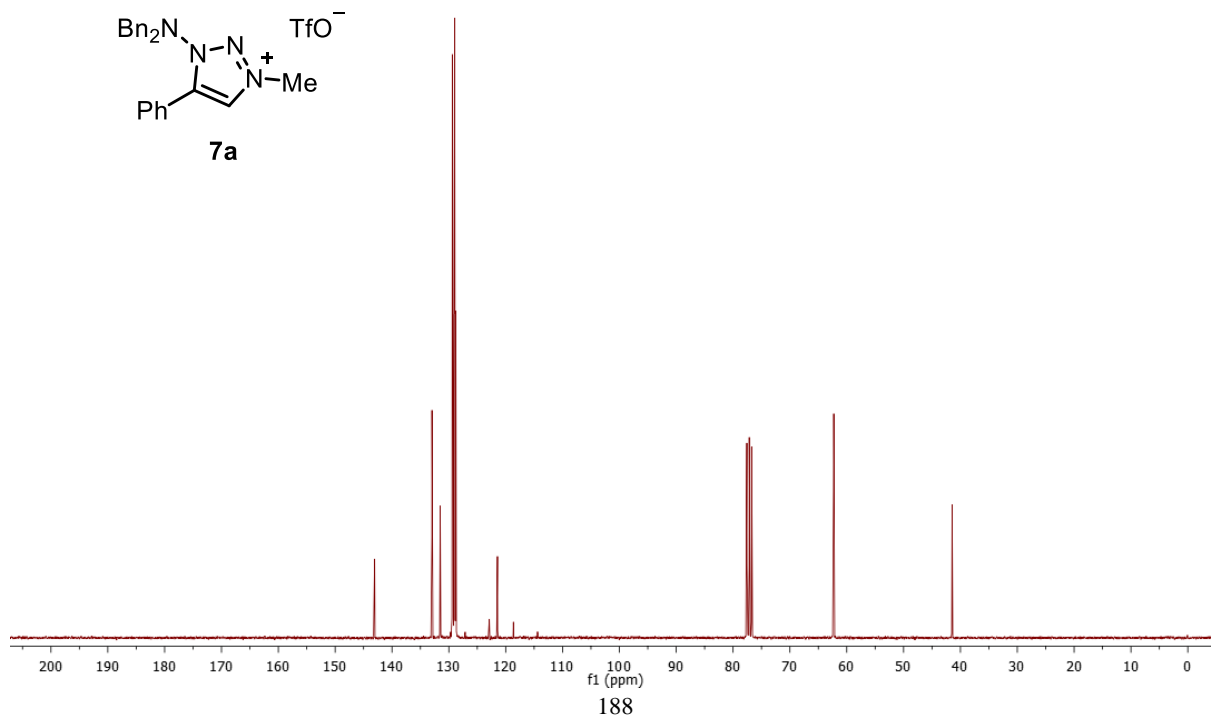

# <sup>1</sup>H NMR (300 MHz, CDCl<sub>3</sub>)

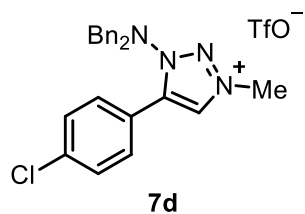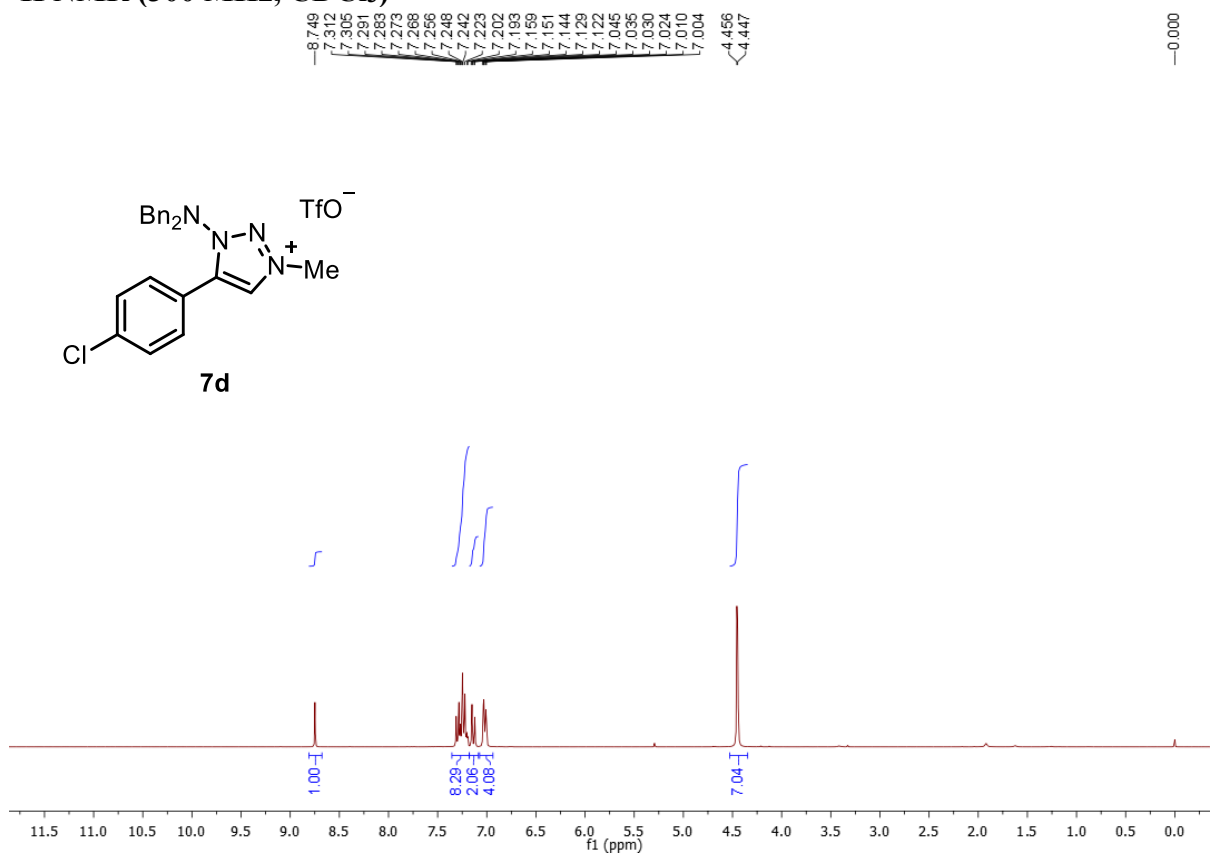

# <sup>13</sup>C NMR (75 MHz, CDCl<sub>3</sub>)

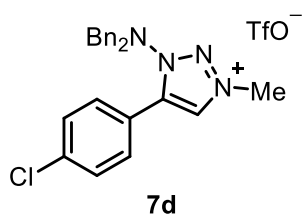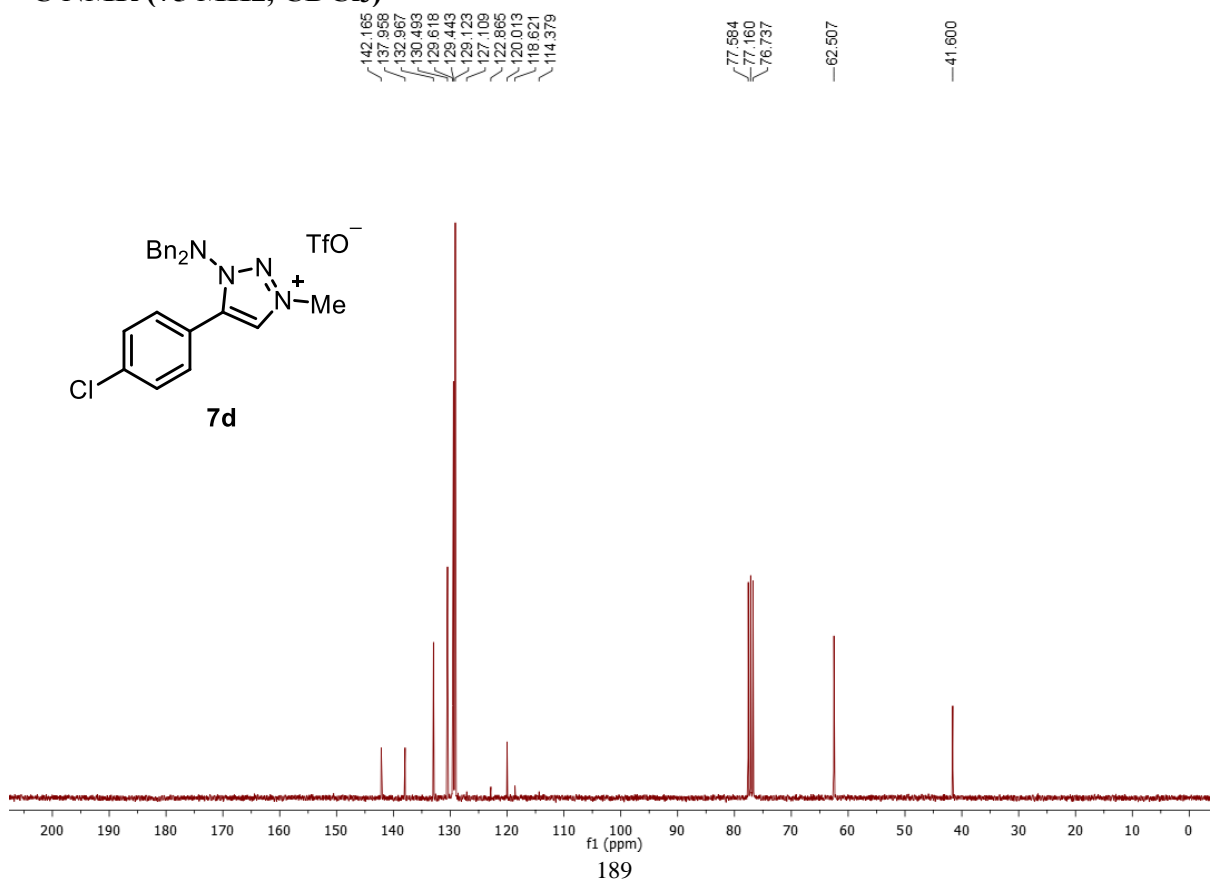

# <sup>1</sup>H NMR (300 MHz, CDCl<sub>3</sub>)

8.811  
7.855  
7.850  
7.844  
7.831  
7.823  
7.565  
7.551  
7.541  
7.533  
7.526  
7.519  
7.508  
7.488  
7.478  
7.306

4.349  
3.872  
3.857  
3.842  
3.422  
3.410  
3.403  
3.391

0.000

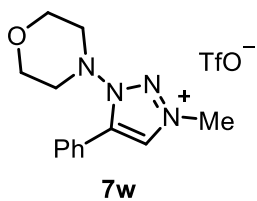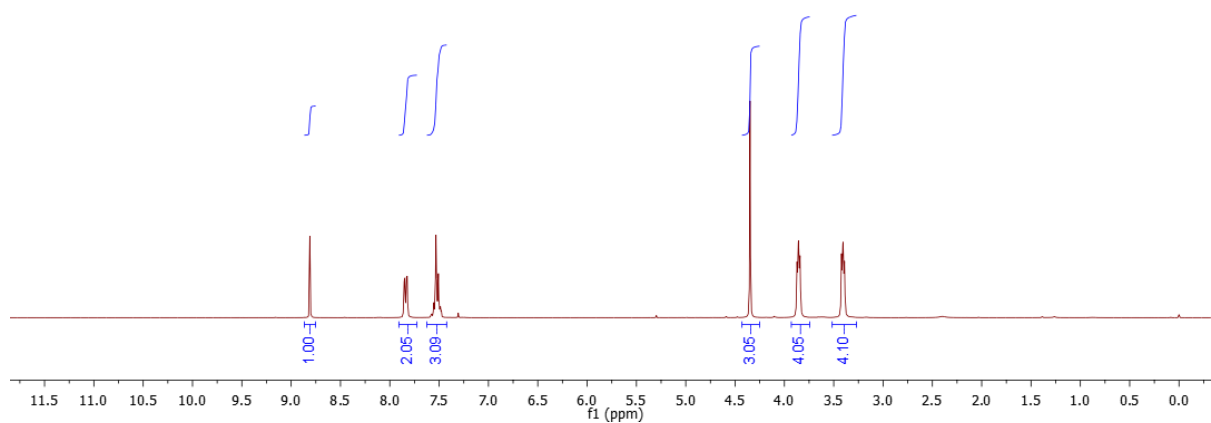

# <sup>13</sup>C NMR (75 MHz, CDCl<sub>3</sub>)

140.246  
131.874  
129.427  
129.347  
128.771  
126.943  
122.697  
121.649  
118.452  
114.206

77.583  
77.160  
76.734

66.185

55.872

41.034

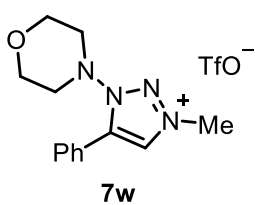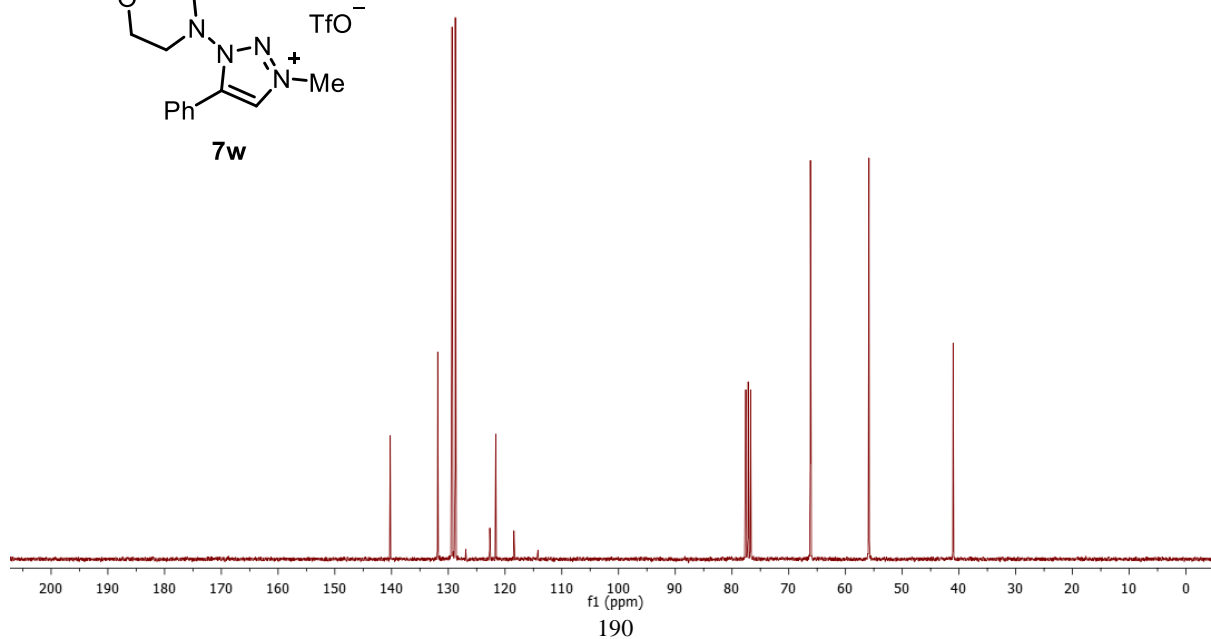

# <sup>1</sup>H NMR (300 MHz, CDCl<sub>3</sub>)

8.946  
7.764  
7.757  
7.743  
7.739  
7.727  
7.674  
7.665  
7.657  
7.644  
7.637  
7.277  
7.274

-4.367  
3.880  
3.874  
3.859  
3.428  
3.416  
3.409  
3.387

-0.000

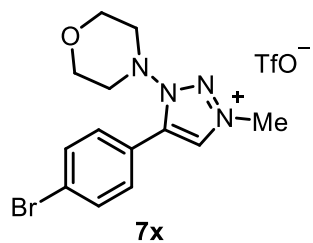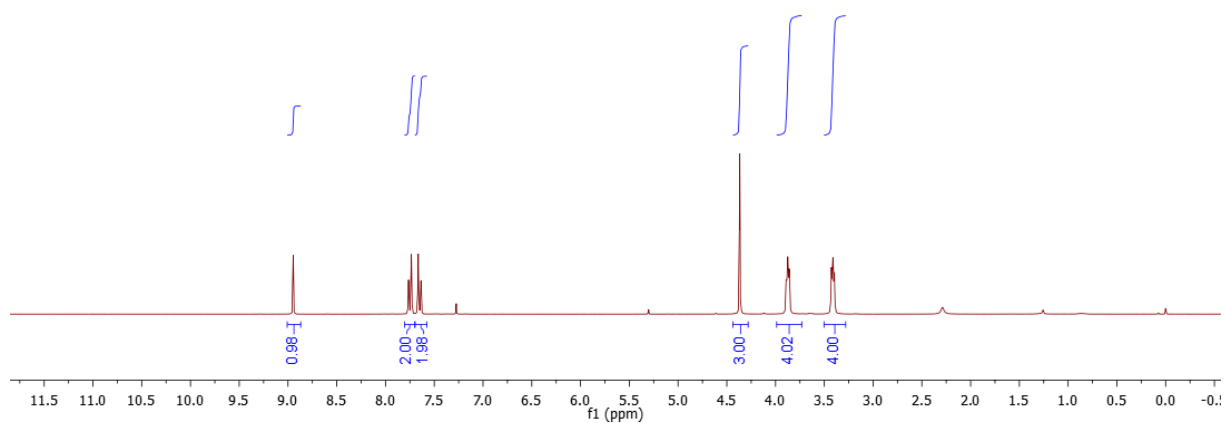

# <sup>13</sup>C NMR (75 MHz, CDCl<sub>3</sub>)

139.534  
132.807  
130.430  
129.945  
126.966  
126.873  
122.715  
120.734  
118.473  
114.231

77.584  
77.160  
76.735

-66.347

-56.054

-41.268

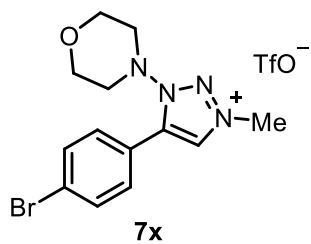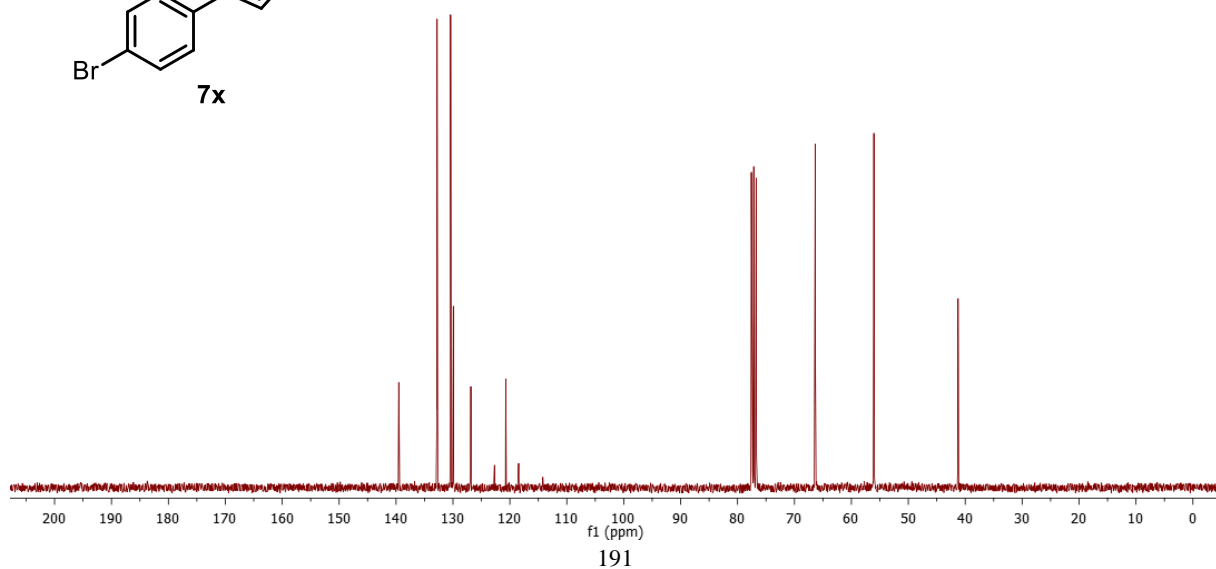

# <sup>1</sup>H NMR (400 MHz, CDCl<sub>3</sub>, 55 °C)

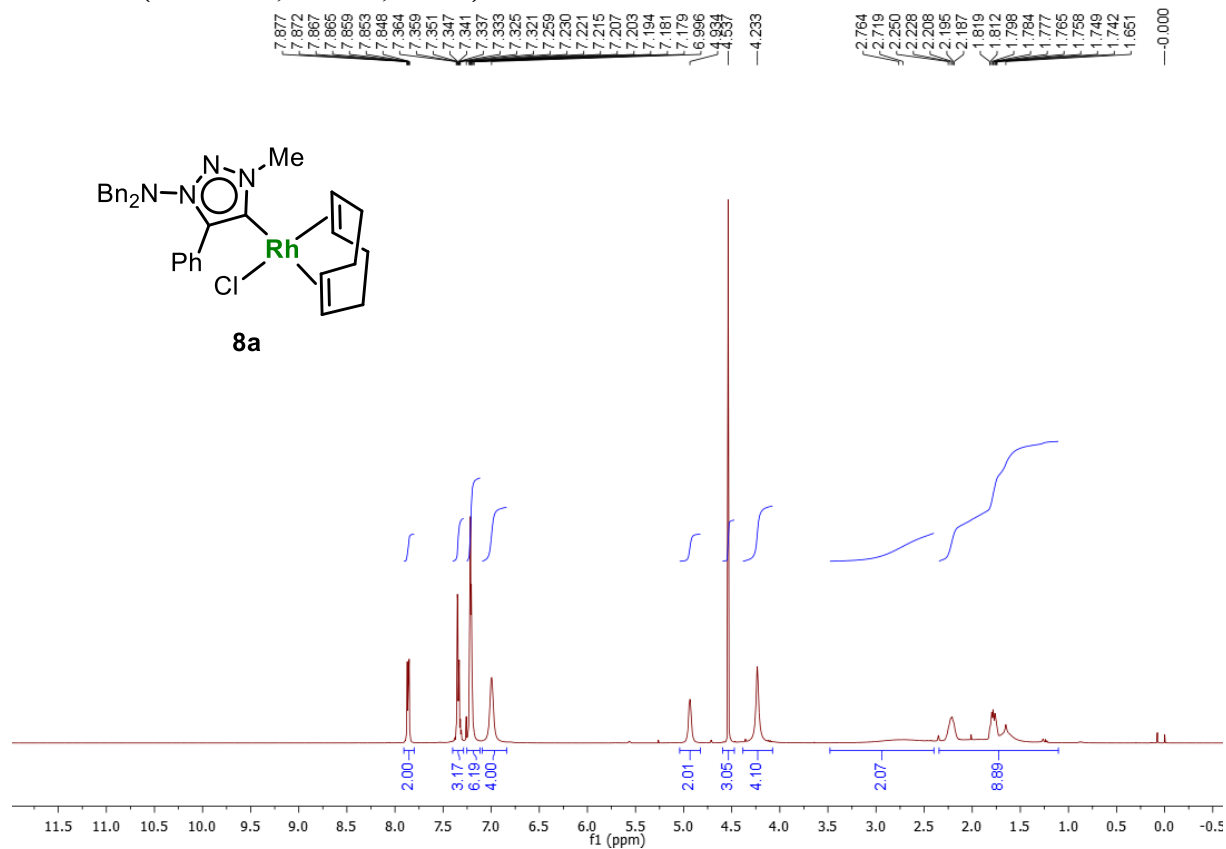

# <sup>13</sup>C NMR (100 MHz, CDCl<sub>3</sub>, 55 °C)

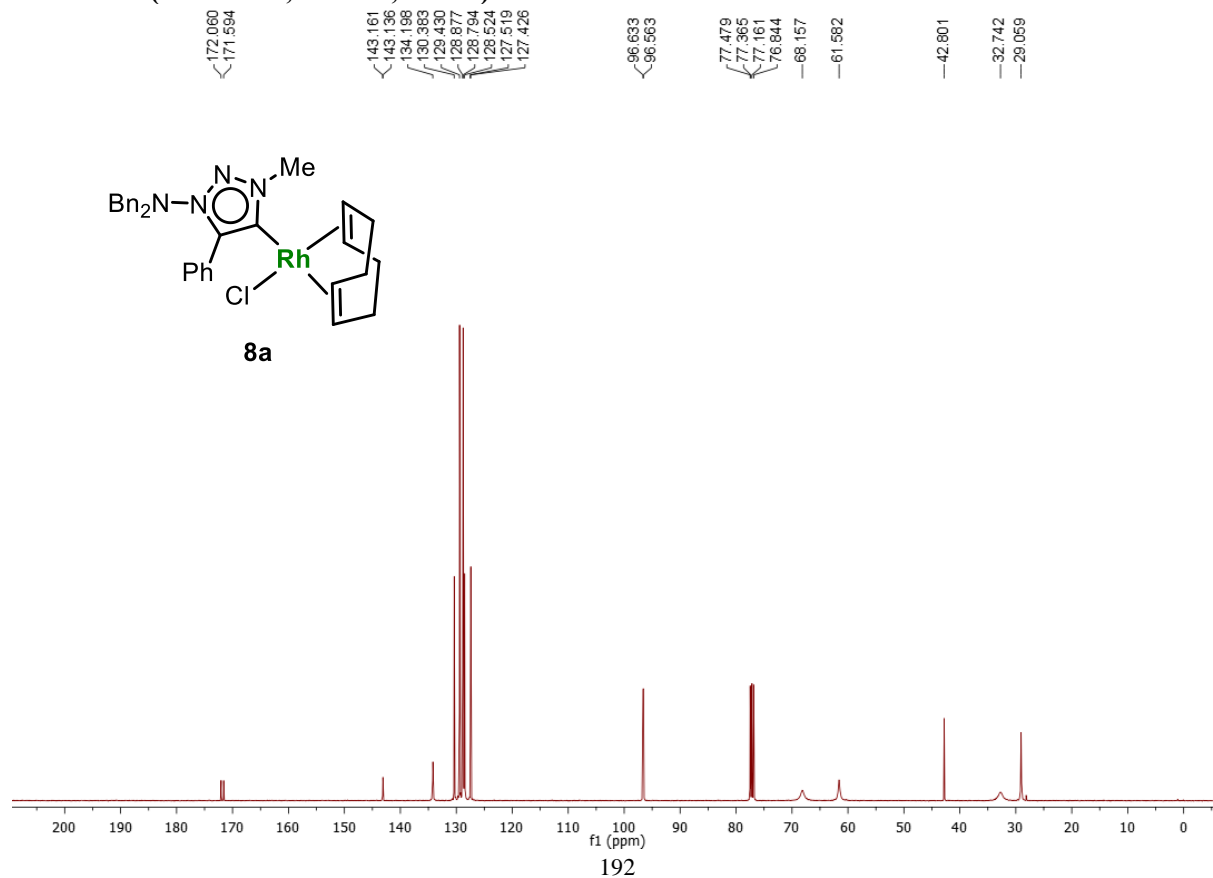

# <sup>1</sup>H NMR (600 MHz, CDCl<sub>3</sub>, 55 °C)

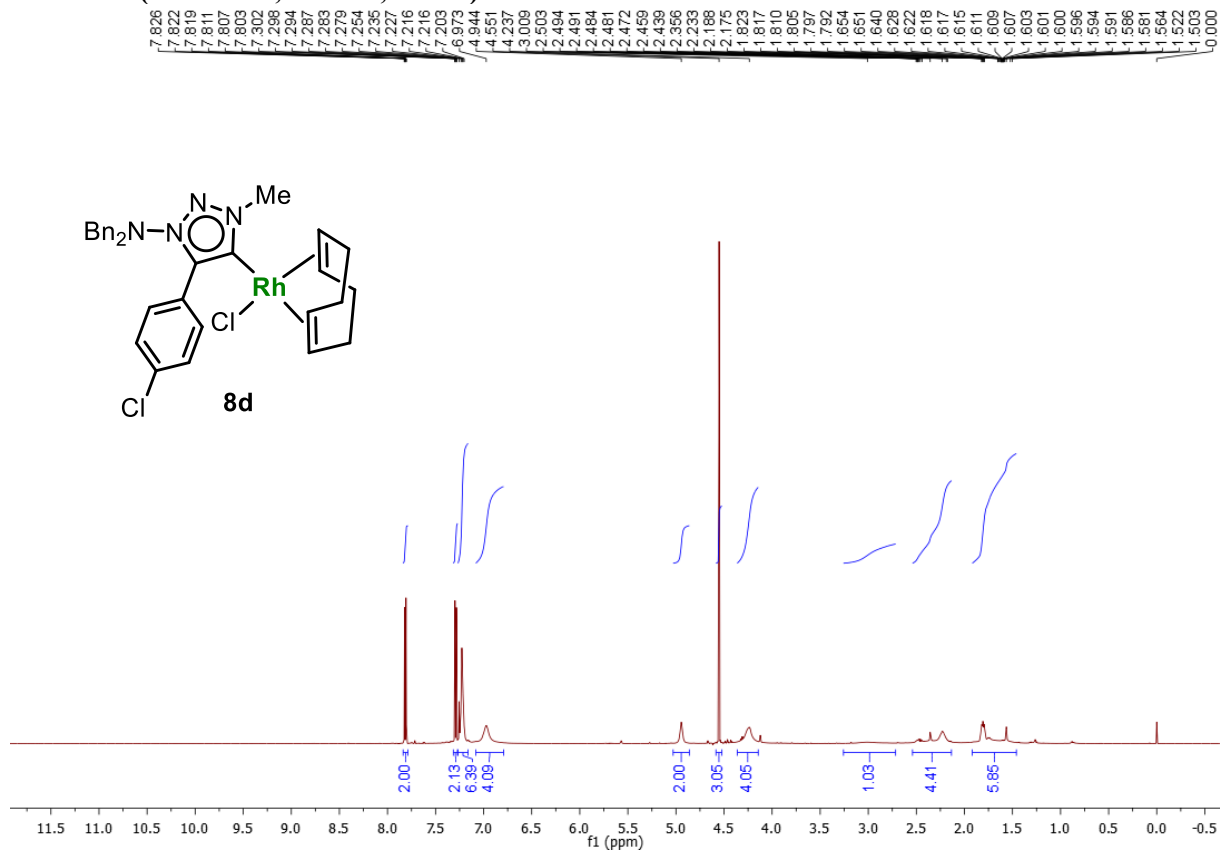

# <sup>13</sup>C NMR (150 MHz, CDCl<sub>3</sub>, 55 °C)

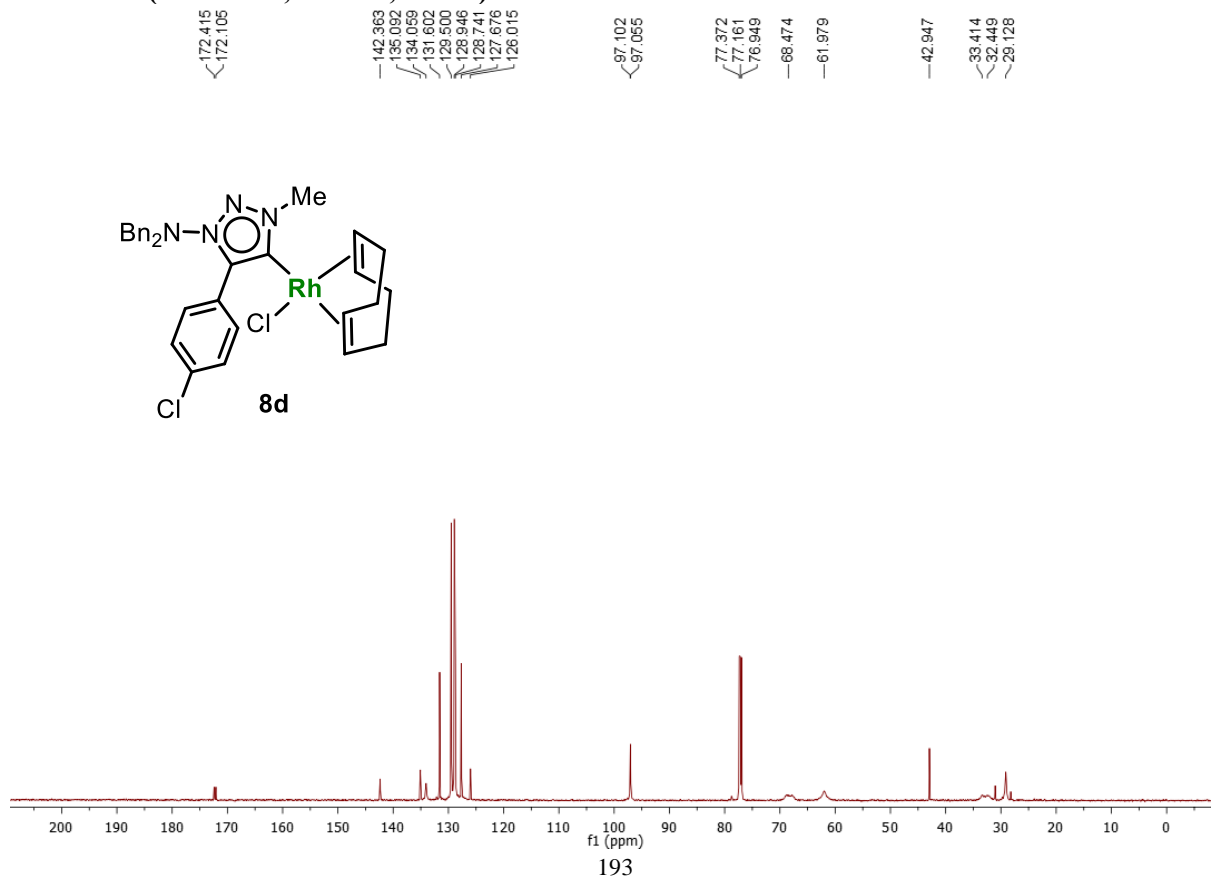

# <sup>1</sup>H NMR (600 MHz, CDCl<sub>3</sub>, 55 °C)

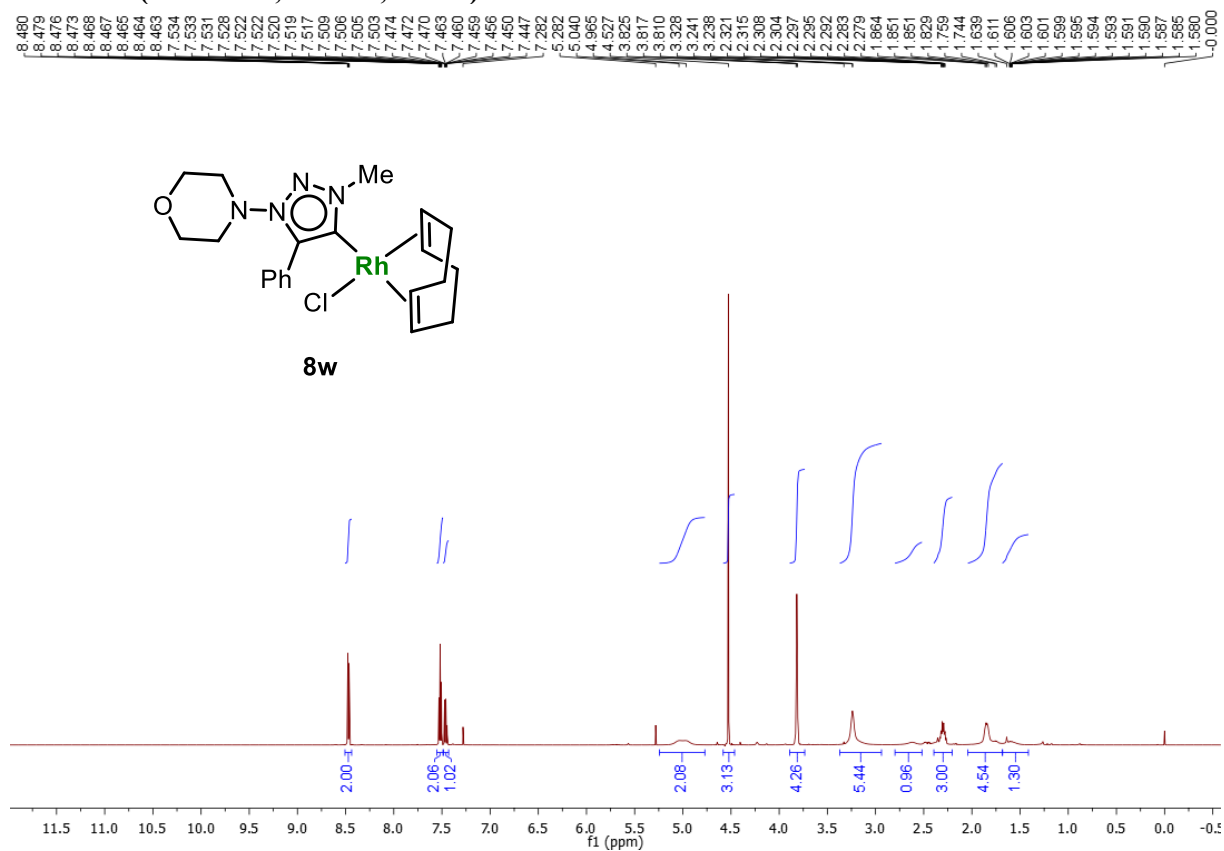

# <sup>13</sup>C NMR (150 MHz, CDCl<sub>3</sub>, 55 °C)

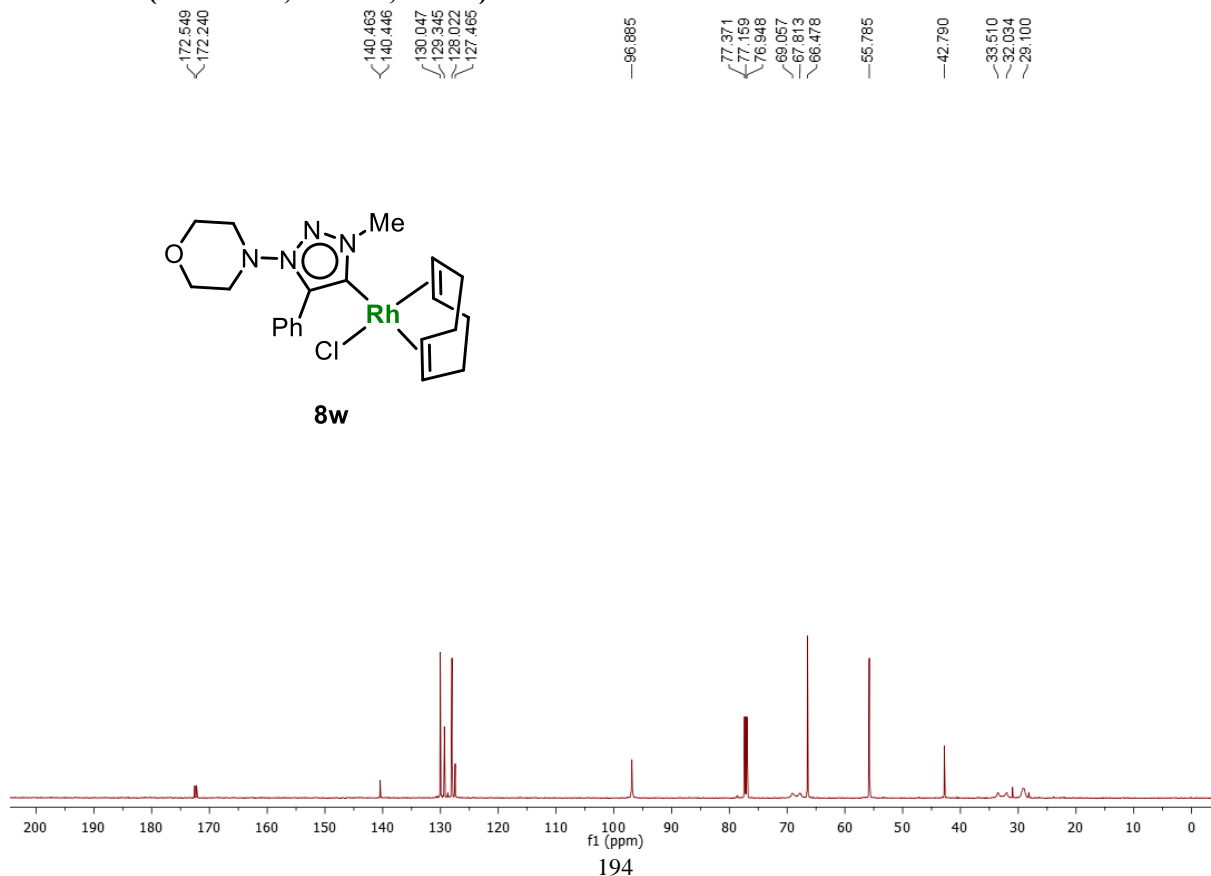

# <sup>1</sup>H NMR (300 MHz, CDCl<sub>3</sub>)

8.473  
8.466  
8.458  
8.442  
8.436  
8.427  
7.691  
7.683  
7.676  
7.660  
7.654  
7.645  
7.269

5.074  
4.948  
4.530

3.863  
3.847  
3.831  
3.274  
3.269  
3.237  
3.221  
3.206  
3.185  
2.602  
2.364  
2.350  
2.334  
2.309  
2.283  
1.893  
1.868  
1.866  
1.666  
1.638  
1.607  
1.564  
0.000

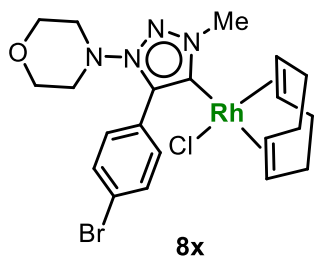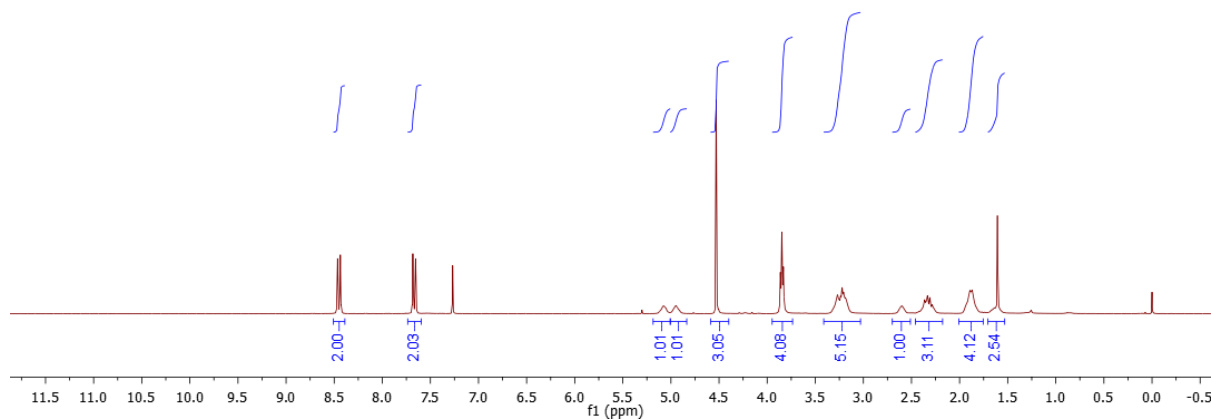

# <sup>13</sup>C NMR (75 MHz, CDCl<sub>3</sub>)

172.780  
172.315

139.390  
139.365  
131.390  
131.351  
126.240  
123.868

97.536  
97.465  
97.234  
97.161

77.478  
77.160  
76.843  
69.993  
68.246  
68.107  
67.962  
66.544  
55.804

42.979  
33.528  
32.104  
29.506  
28.853

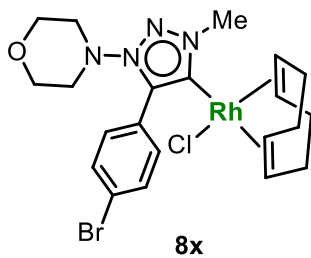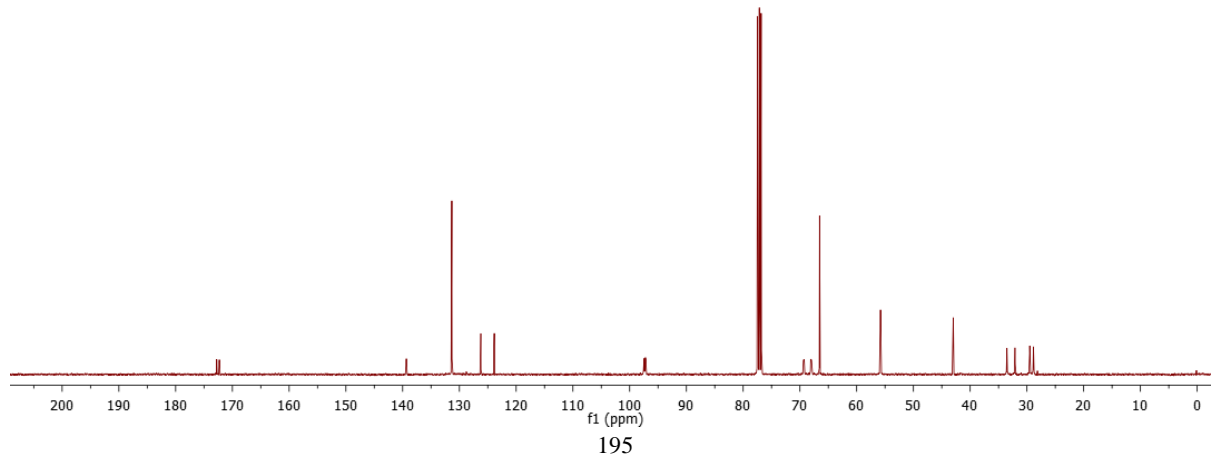



# <sup>1</sup>H NMR (300 MHz, CDCl<sub>3</sub>)

7.397  
7.386  
7.377  
7.368  
7.345  
7.342  
7.337  
7.326  
7.319  
7.316  
7.307  
7.298  
7.279  
7.273  
7.259  
7.256  
7.248  
7.240  
7.234  
7.223  
7.216  
7.210  
7.205  
7.028  
7.019  
7.013  
7.005  
6.994  
6.987  
4.426  
4.297

1.624  
1.426

-0.000

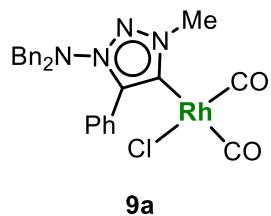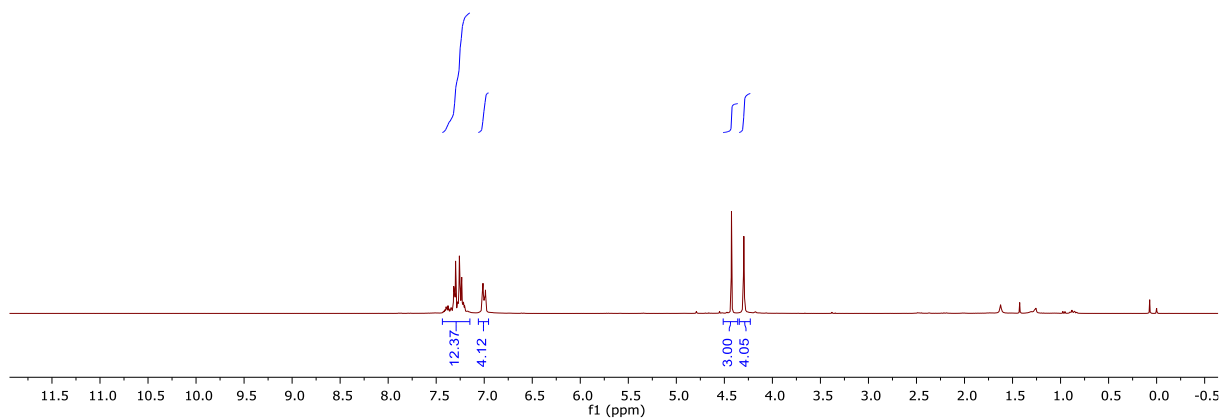

# <sup>13</sup>C NMR (75 MHz, CDCl<sub>3</sub>)

186.234  
185.516  
183.503  
182.506  
162.371  
161.847  
146.145  
146.104  
133.850  
130.556  
129.585  
129.347  
128.965  
128.746  
127.794  
126.329  
77.583  
77.160  
76.737  
61.815  
43.494

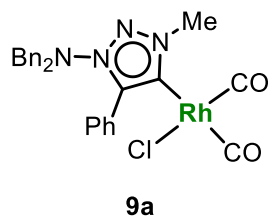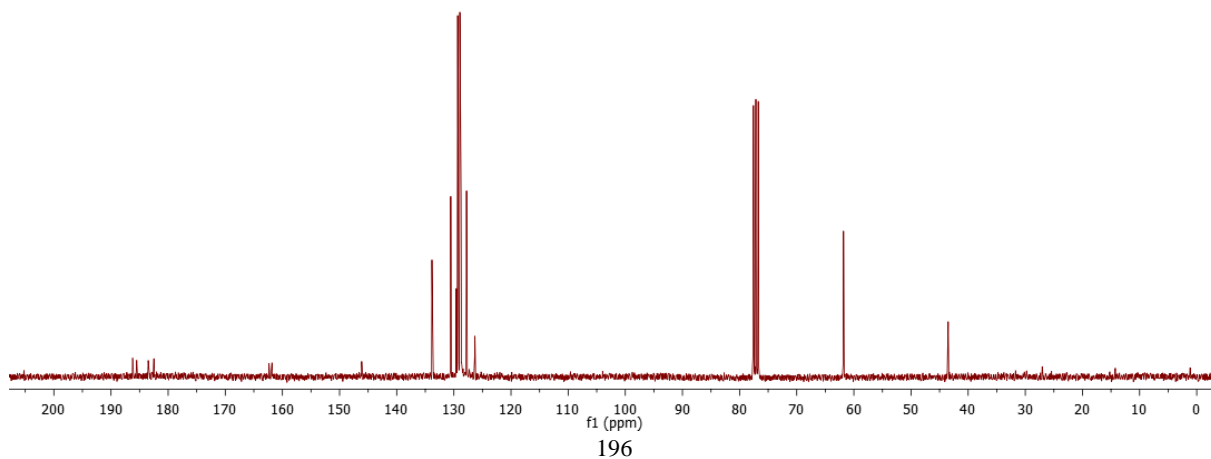

# <sup>1</sup>H NMR (300 MHz, CDCl<sub>3</sub>)

7.987  
7.980  
7.965  
7.958  
7.858  
7.851  
7.650  
7.274

4.402  
3.873  
3.858  
3.842  
3.317  
3.300  
3.286

1.632

0.000

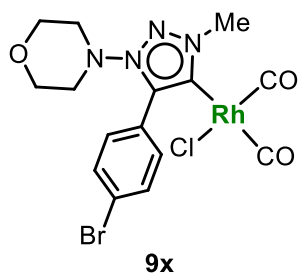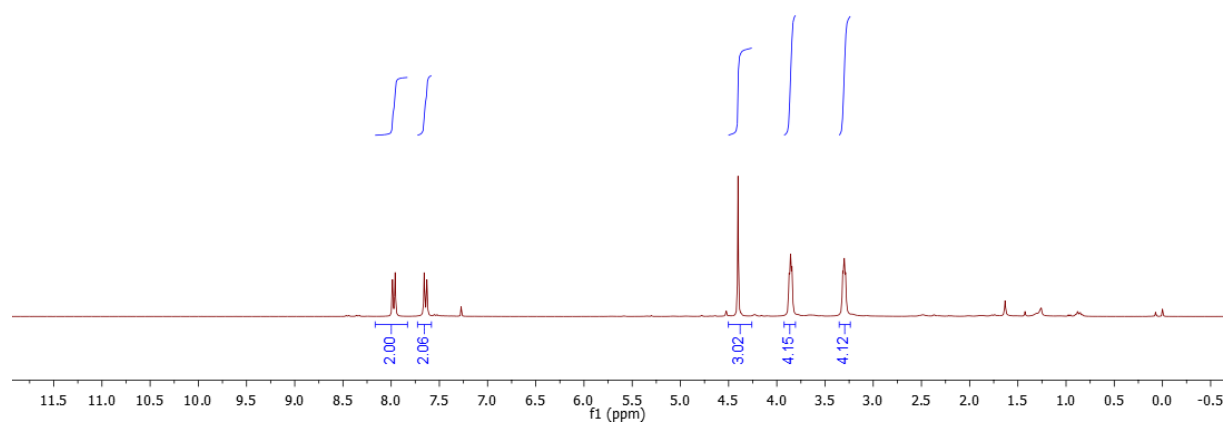

# <sup>13</sup>C NMR (75 MHz, CDCl<sub>3</sub>)

185.870  
185.151  
183.388  
182.363

163.196  
162.670

142.233  
142.182

131.784  
131.674  
125.077  
124.830

77.584  
77.160  
76.737

66.429

55.882

43.585

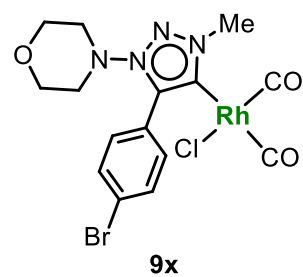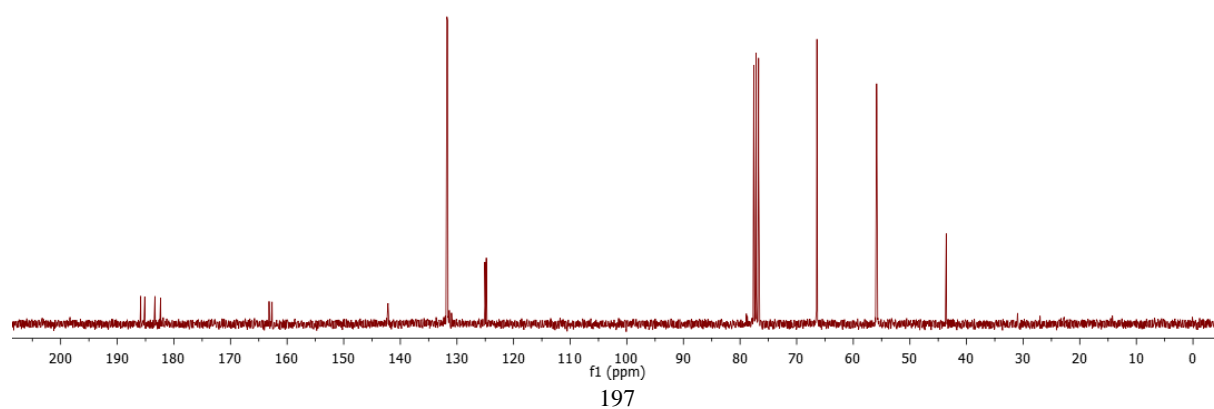

Supplement: ANIE-60-6943-s001.pdf [file ANIE-60-6943-s001.pdf]
